# Supplementary material for: ANGPT1 as a Key Regulator in Tumor Microenvironment and Immunotherapy Response Across Multiple Cancers: A Pan-cancer Analysis
Source: Research Square preprint supplement (doi:10.21203/rs.3.rs-8265672/v1), 2025-12-25
Supplement: Supplementary file 1 [file 2da13a78c5c7e981f35a2025.docx]

| **The top 50 genes with ANGPT1 were positively (A) and negatively (B) linked** | | | | | | | |
| --- | --- | --- | --- | --- | --- | --- | --- |
| **A** | **Query** | **Statistic** | **P-value** | **B** | **Query** | **Statistic** | **P-value** |
|  | ANGPT1 | 1.000 | 1.00E-64 |  | SUPV3L1 | -0.606 | 5.21E-53 |
|  | CD109 | 0.654 | 2.69E-64 |  | SEC24C | -0.568 | 2.07E-45 |
|  | DDIT4L | 0.627 | 9.35E-58 |  | PRR3 | -0.567 | 2.88E-45 |
|  | ITGA6 | 0.624 | 6.16E-57 |  | HDAC5 | -0.567 | 3.54E-45 |
|  | TMEM220 | 0.609 | 8.75E-54 |  | ZNF74 | -0.561 | 4.70E-44 |
|  | LOC100132707 | 0.609 | 1.06E-53 |  | RCOR2 | -0.558 | 1.64E-43 |
|  | FAM198B | 0.608 | 1.42E-53 |  | ZNF821 | -0.557 | 2.08E-43 |
|  | MDFIC | 0.605 | 6.96E-53 |  | BCAR1 | -0.556 | 3.93E-43 |
|  | AMIGO2 | 0.604 | 1.62E-52 |  | ASB13 | -0.555 | 4.42E-43 |
|  | C10orf105 | 0.599 | 1.20E-51 |  | TTLL12 | -0.548 | 7.86E-42 |
|  | SLC2A10 | 0.599 | 1.60E-51 |  | HMX1 | -0.547 | 1.23E-41 |
|  | PLS3 | 0.598 | 2.52E-51 |  | CSNK1E | -0.547 | 1.29E-41 |
|  | PGCP | 0.590 | 1.02E-49 |  | CBARA1 | -0.547 | 1.58E-41 |
|  | ACSS3 | 0.590 | 1.22E-49 |  | ANKRD16 | -0.545 | 3.04E-41 |
|  | MOXD1 | 0.589 | 1.82E-49 |  | TYSND1 | -0.544 | 4.30E-41 |
|  | LTBP1 | 0.587 | 5.15E-49 |  | NLGN2 | -0.543 | 5.70E-41 |
|  | HFE | 0.585 | 1.13E-48 |  | CWF19L1 | -0.542 | 8.79E-41 |
|  | C9orf64 | 0.583 | 2.31E-48 |  | STARD10 | -0.541 | 1.69E-40 |
|  | PLEKHG1 | 0.582 | 4.38E-48 |  | PCGF2 | -0.540 | 1.83E-40 |
|  | F3 | 0.580 | 1.12E-47 |  | EHMT2 | -0.540 | 2.43E-40 |
|  | GALNT4 | 0.578 | 3.09E-47 |  | C17orf96 | -0.539 | 3.37E-40 |
|  | SWAP70 | 0.577 | 4.86E-47 |  | BAT3 | -0.539 | 3.82E-40 |
|  | CCDC46 | 0.576 | 5.57E-47 |  | PDCD11 | -0.538 | 5.39E-40 |
|  | PIPOX | 0.572 | 3.10E-46 |  | RANBP17 | -0.538 | 5.69E-40 |
|  | DNAH9 | 0.571 | 5.08E-46 |  | FSD1 | -0.534 | 2.42E-39 |
|  | GMPR | 0.570 | 7.19E-46 |  | FXR2 | -0.530 | 9.71E-39 |
|  | SDC2 | 0.569 | 1.52E-45 |  | BMP2 | -0.529 | 1.65E-38 |
|  | CHST6 | 0.568 | 1.82E-45 |  | SOX8 | -0.527 | 2.84E-38 |
|  | SLC7A11 | 0.566 | 3.96E-45 |  | EDC4 | -0.526 | 4.28E-38 |
|  | C1orf110 | 0.566 | 4.97E-45 |  | H2AFY2 | -0.526 | 4.62E-38 |
|  | IQCG | 0.564 | 9.34E-45 |  | PPP3CC | -0.521 | 2.79E-37 |
|  | MEGF10 | 0.563 | 1.97E-44 |  | POLL | -0.521 | 2.89E-37 |
|  | C14orf86 | 0.562 | 2.98E-44 |  | TBKBP1 | -0.521 | 3.17E-37 |
|  | LOXL4 | 0.561 | 4.57E-44 |  | TFAP4 | -0.520 | 3.73E-37 |
|  | EYA2 | 0.559 | 1.15E-43 |  | PPRC1 | -0.520 | 4.51E-37 |
|  | EVC2 | 0.558 | 1.66E-43 |  | LOC254559 | -0.519 | 6.88E-37 |
|  | MSN | 0.557 | 2.23E-43 |  | C2orf27A | -0.517 | 1.40E-36 |
|  | FGF1 | 0.556 | 2.90E-43 |  | HINFP | -0.516 | 1.73E-36 |
|  | TMEM74 | 0.556 | 3.28E-43 |  | BMS1 | -0.515 | 2.36E-36 |
|  | SPATS2L | 0.555 | 5.46E-43 |  | BCL7A | -0.515 | 2.48E-36 |
|  | RGS22 | 0.552 | 2.12E-42 |  | RXRB | -0.513 | 5.96E-36 |
|  | B3GNT5 | 0.551 | 2.18E-42 |  | WDR74 | -0.512 | 8.48E-36 |
|  | CRB2 | 0.551 | 2.70E-42 |  | VDAC2 | -0.512 | 8.61E-36 |
|  | SLC16A4 | 0.548 | 7.34E-42 |  | RIPPLY2 | -0.511 | 1.15E-35 |
|  | PLA2G5 | 0.548 | 1.02E-41 |  | TAF1D | -0.510 | 1.60E-35 |
|  | ARSJ | 0.545 | 2.91E-41 |  | VARS | -0.510 | 1.69E-35 |
|  | SFRP4 | 0.545 | 2.94E-41 |  | C10orf2 | -0.508 | 3.46E-35 |
|  | IQUB | 0.544 | 3.87E-41 |  | SNHG1 | -0.505 | 1.04E-34 |
|  | C11orf63 | 0.544 | 5.37E-41 |  | MINPP1 | -0.504 | 1.59E-34 |
|  | SAMD9L | 0.543 | 6.34E-41 |  | LRIT2 | -0.504 | 1.59E-34 |
