# Supplementary material for: ANGPT1 as a Key Regulator in Tumor Microenvironment and Immunotherapy Response Across Multiple Cancers: A Pan-cancer Analysis
Source: Research Square preprint supplement (doi:10.21203/rs.3.rs-8265672/v1), 2025-12-25
Supplement: Supplementary file 2 [file 5990ea7ac1f61b3a8c6c2fce.xlsx]

## Sheet: BLCA
	Camptothecin_1003	Vinblastine_1004	Cisplatin_1005	Cytarabine_1006	Docetaxel_1007	Gefitinib_1010	0vitoclax_1011	Vorinostat_1012	Nilotinib_1013	Olaparib_1017	Axitinib_1021	AZD7762_1022	SB216763_1025	KU-55933_1030	Afatinib_1032	Staurosporine_1034	PLX-4720_1036	NU7441_1038	Doramapimod_1042	Wee1 Inhibitor_1046	Nutlin-3a (-)_1047	Mirin_1048	PD173074_1049	ZM447439_1050	Alisertib_1051	RO-3306_1052	MK-2206_1053	Palbociclib_1054	Dactolisib_1057	Pictilisib_1058	AZD8055_1059	PD0325901_1060	Obatoclax Mesylate_1068	5-Fluorouracil_1073	Dasatinib_1079	Paclitaxel_1080	Crizotinib_1083	Rapamycin_1084	Sorafenib_1085	BI-2536_1086	Irinotecan_1088	Oxaliplatin_1089	BMS-536924_1091	GSK1904529A_1093	Tozasertib_1096	PF-4708671_1129	PRIMA-1MET_1131	Erlotinib_1168	Niraparib_1177
TCGA-FD-A5BX	0.00773177	0.00671125	14.4106	0.394818	0.0121906	162.692	56.9075	37.917	73.2697	19.7918	18.204	0.219789	126.737	35.7857	14.4166	0.00153186	10.7611	6.61355	170.537	13.1073	137.554	105.948	94.9034	19.6079	0.481734	17.4857	22.2734	0.967531	0.0170654	1.70723	0.516899	0.0503937	0.934963	9.71502	1.53656	0.0945079	31.8749	0.0727339	48.5331	0.935272	0.356776	9.90481	1.50854	467.74	12.6256	50.7533	164.833	32.9709	36.6943
TCGA-XF-AAN7	0.0212245	0.0385095	8.03033	20.788	0.039305	380.323	16.867	41.5882	51.4105	3.12856	8.66947	3.07498	391.249	64.743	57.5658	0.0229986	46.7339	7.12569	109.688	12.6595	511.83	55.6231	84.2562	8.46118	0.23889	13.8241	18.5698	42.0214	0.0727711	3.64515	0.590715	6.27134	1.48997	154.706	83.7343	0.106305	7.76611	0.123225	17.9187	0.0524171	0.676324	41.0696	15.0391	75.9715	2.41261	30.2736	39.8641	95.7428	5.73893
TCGA-BL-A13I	0.0331787	0.00712823	239.529	2.28556	0.029701	85.5099	14.8981	125.842	22.4348	23.434	16.2469	0.769753	77.0852	28.7332	11.2743	0.00760107	22.0215	3.90314	43.4134	4.9182	273.326	157.869	87.1381	9.41855	0.0719343	9.20171	6.75635	13.9151	0.0226407	0.752334	0.653113	0.960093	2.39389	22.45	4.46065	0.0267715	23.587	0.021213	17.7292	0.0407092	6.30214	16.0098	4.00211	75.4941	3.01322	61.7847	72.2666	17.8293	4.67249
TCGA-BT-A20V	0.0246183	0.0251012	11.9057	1.35258	0.00833641	17.2661	41.8847	8.75001	155.106	15.9487	26.6794	0.400844	304.932	99.0441	4.951	0.038083	38.9645	14.9304	190.53	3.00842	1107.36	35.8279	257.608	16.612	0.794652	20.2054	40.2424	25.2622	0.0506909	3.26853	1.03938	3.21087	2.17351	46.0128	6.75087	0.0186632	30.8415	0.0984695	17.1015	0.485247	0.963329	2.56823	3.43786	52.1497	14.7471	81.2841	823.975	3.56692	122.149
TCGA-FD-A62S	0.0277428	0.0096944	27.2281	5.59818	0.00983831	41.8323	5.46145	15.9947	26.5741	23.7055	23.0216	1.36617	207.244	39.9577	5.27441	0.00485569	40.9389	7.61917	96.4486	11.2943	79.0992	65.5719	28.4629	12.9904	0.963854	18.6628	28.2252	29.4954	0.130232	2.512	0.734921	0.776803	1.5697	38.1541	0.277118	0.0327566	16.9	0.0892228	31.6778	1.34322	1.70509	28.4372	5.39645	56.3979	15.4938	54.8635	44.6612	15.8695	20.226
TCGA-GV-A40E	0.0168619	0.0127133	14.0149	2.7955	0.0121825	65.3127	69.1336	39.2557	223.434	50.6113	28.4362	0.998004	227.814	66.492	7.58749	0.0208473	122.035	11.4395	188.368	18.2484	315.601	109.884	498.101	15.8933	0.979573	19.4142	101.228	34.5779	0.137923	3.34971	0.756598	0.740903	1.06548	8.90565	2.74691	0.0588935	32.3159	0.101351	70.6574	0.604537	2.00767	19.1566	15.9785	181.215	17.8839	52.1454	93.014	19.7928	29.6126
TCGA-H4-A2HQ	0.0561922	0.055098	29.1918	3.06609	0.0221598	33.3519	17.0303	6.61721	72.4019	46.6084	37.4131	1.67598	259.222	151.666	6.8063	0.0985289	222.006	18.2144	95.7327	5.67217	842.973	168.48	78.5228	18.0815	15.4886	23.7829	75.1098	58.1374	0.153422	10.0589	1.12881	0.869925	5.72464	54.2756	11.5973	0.0748593	45.96	0.0271896	31.4502	0.996436	6.26113	28.3063	27.5037	108.057	24.8893	81.4626	113.455	11.3892	70.5044
TCGA-E7-A677	0.0700095	0.0449446	101.947	1.75532	0.0215221	26.6685	7.04777	5.34661	64.0784	94.7202	18.5732	3.72934	188.652	97.3111	6.14855	0.0945721	42.9362	16.1203	112.9	7.98292	47.3268	137.858	44.3479	21.305	4.41746	19.8986	40.786	23.7753	0.163093	8.29294	1.11483	0.372324	3.65093	117.988	4.85794	0.16106	25.9063	0.0796004	13.0752	1.17706	13.0314	23.5152	8.32683	65.2357	13.5252	38.653	110.294	10.4252	65.3519
TCGA-G2-A2EF	0.0054721	0.00336489	1.95747	0.481324	0.00673361	66.5491	18.9611	9.84845	109.698	17.2284	36.375	0.26509	176.187	85.2836	20.8555	0.0056245	56.1162	10.5906	205.555	3.64794	480.04	74.1369	131.723	23.2179	0.684646	18.4196	76.2936	31.3754	0.0328448	3.33757	0.768747	0.247664	0.628485	5.13462	0.108766	0.0170089	12.9695	0.0461661	27.6911	0.499158	0.35687	6.0642	6.34051	116.799	14.9142	99.9261	21.5782	26.3077	7.10663
TCGA-GU-A42Q	0.120509	0.00318351	14.3844	3.64193	0.00139629	3.42989	17.0692	5.82124	63.6803	142.653	25.7729	0.138975	173.452	50.2627	1.07167	0.0169838	65.504	12.0344	155.238	2.55816	246.329	113.886	63.7273	15.1358	1.7974	19.2709	5.4001	26.4387	0.170365	0.649546	1.04928	0.746015	3.40836	15.923	0.180156	0.00399888	12.3865	0.198989	28.8135	0.503797	34.3148	62.0336	1.32329	85.6071	12.0956	76.9299	1550.96	2.37318	78.2089
TCGA-K4-A4AC	0.0179793	0.0072049	2.29944	3.57976	0.00230501	1.94899	2.4077	2.25051	26.0839	32.7863	13.7071	0.29045	211.299	57.3188	0.730925	0.0232977	18.5122	14.6075	135.917	3.75608	61.1608	48.1832	28.7386	13.8871	2.11006	21.6923	14.8857	36.1127	0.472266	3.50177	0.882668	0.900346	1.68479	51.1328	1.32947	0.0106323	14.3987	0.0904294	8.74853	1.30438	3.40702	36.0707	3.76421	16.7229	16.299	38.6235	57.195	1.92297	31.9076
TCGA-ZF-AA4N	0.0294045	0.00970881	8.69439	6.6126	0.00258406	32.4329	25.5872	8.62973	74.7298	85.0493	17.055	0.433881	183.506	59.4221	7.15839	0.0109048	48.6105	10.3493	150.363	5.31668	266.655	183.342	82.3884	21.1285	1.05011	17.1688	10.8366	22.6486	0.0511788	0.666858	0.862927	1.56319	2.98768	50.024	0.927505	0.00594065	14.2147	0.119329	20.8415	0.623649	4.53957	14.99	2.06578	177.251	10.6318	69.9804	655.232	16.1595	62.1134
TCGA-FD-A5BZ	0.226206	0.123322	142.302	43.6841	0.101961	71.442	29.0108	16.1015	42.8649	85.6459	38.2289	6.15669	256.899	60.0533	21.1874	0.0154011	155.43	8.99405	71.0481	72.0069	255.87	397.001	42.7172	18.2552	18.457	20.3327	33.2033	58.4406	0.154854	4.34277	0.767857	4.11074	4.79975	170.355	1.59762	0.510488	69.5557	0.0542967	57.1172	1.09633	25.3728	152.749	6.38101	204.294	29.825	82.0412	219.907	39.2791	139.767
TCGA-GU-AATQ	0.173623	0.0340691	27.0887	7.51362	0.0102054	23.9693	19.0652	8.23338	64.8808	206.902	59.5491	0.834018	271.647	125.93	2.17211	0.0304653	163.382	20.3806	180.225	25.862	450.315	279.46	31.631	40.0756	5.85692	26.7523	10.3075	22.5363	0.256532	0.583305	1.13787	2.53653	16.605	22.1326	0.183153	0.0265215	32.5234	0.237753	37.0726	1.94768	26.8308	59.6266	2.7938	227.75	37.5513	60.3986	980.702	13.584	132.866
TCGA-K4-A5RI	0.0775366	0.0301036	30.4487	14.4397	0.00704244	26.9249	32.2868	19.5295	157.187	308.244	46.3994	1.46327	262.163	121.123	2.71314	0.0408991	210.807	19.2448	223.926	32.7299	915.68	543.648	74.6731	35.0986	1.97391	23.1837	11.7442	32.2715	0.160943	0.569488	1.12519	4.47207	21.8173	22.7967	1.66825	0.0206919	44.1811	0.202586	59.2782	2.05526	8.21074	94.5794	2.61408	514.803	28.5608	69.0204	1765.94	11.4844	167.51
TCGA-4Z-AA80	0.0950804	0.0167694	18.8067	9.55993	0.0163891	42.5831	1.2311	4.31444	19.4167	47.7	46.534	4.24548	331.376	213.136	8.98312	0.145529	221.589	21.6618	110.577	4.70046	449.21	315.484	25.2681	44.3102	16.1012	26.4774	18.3054	43.9956	0.160955	5.91587	1.01902	11.2799	5.11954	127.817	19.4565	0.0268802	40.8892	0.0580051	11.3391	0.818007	16.3695	26.6497	27.5775	40.9789	29.1417	91.8659	229.534	14.3348	143.408
TCGA-ZF-AA4R	0.0325506	0.0120565	3.40167	1.97992	0.00756703	23.1785	4.99403	2.11789	26.3202	27.4197	18.6866	0.866772	237.119	78.0428	8.94684	0.0202372	77.9605	11.1304	67.4505	5.92726	53.7907	82.3764	15.5137	11.1905	8.5871	20.0504	17.338	53.311	0.174246	6.34798	0.750125	3.56619	3.29241	63.6403	8.89413	0.0253124	13.9978	0.0439983	15.3921	0.673456	2.64674	40.352	9.72848	54.1351	10.9092	47.9583	67.2515	16.0481	16.6214
TCGA-FD-A3SP	0.0280828	0.00710784	5.86026	2.37693	0.00499749	61.8647	6.92652	6.51326	37.7328	26.542	19.9679	0.781746	148.6	42.2419	17.3494	0.00211398	26.9001	7.03724	69.6844	8.16143	22.4805	119.183	16.4315	9.92515	1.72295	16.8466	33.5995	23.6054	0.0707014	2.41719	0.641942	1.72968	2.11839	25.8015	0.0849986	0.0261019	16.7558	0.102542	28.4388	0.913422	2.80446	27.7981	3.2593	194.129	11.9896	58.0282	41.7055	28.2386	18.9057
TCGA-XF-AAN4	0.182186	0.0737542	198.695	8.23864	0.0182195	126.722	23.0138	3.18142	2.60132	72.4172	27.1437	1.32826	135.59	106.424	48.7542	0.0102397	63.5396	10.297	85.582	51.376	125.03	91.4519	14.5155	25.5603	4.94362	18.9308	8.66315	34.9842	0.118235	1.16052	0.653586	1.1774	4.00162	55.9778	2.79713	0.0376398	15.8245	0.0786425	19.0472	1.24555	56.7646	111.571	2.8801	90.9783	23.388	54.8242	28.8273	63.2329	27.9023
TCGA-XF-A9SM	0.0212039	0.0179267	6.01511	7.55488	0.0161671	62.7617	13.64	63.3486	97.5037	34.7598	47.3393	0.856924	193.727	63.6788	7.36097	0.00779151	127.823	13.4934	142.488	22.0833	406.667	141.286	84.2733	19.319	0.713452	25.8893	15.4738	28.7559	0.133659	0.983152	0.75106	0.980589	1.57473	4.36956	0.965626	0.0381539	22.5164	0.214735	50.168	3.45291	1.52311	11.3526	4.72544	159.768	26.3868	53.1637	98.7187	21.0841	16.4917
TCGA-XF-A9SK	0.149045	0.508826	125.68	49.0048	0.121655	88.8714	11.0168	41.8028	74.095	134.755	55.7442	4.49827	317.256	114.504	22.3644	0.0572371	221.768	17.0951	115.382	79.2434	373.096	274.716	80.2257	32.9385	10.5589	27.7389	26.5655	75.7573	0.150927	1.59635	0.922352	3.52677	6.12731	143.273	3.85223	0.456594	53.5161	0.0635555	45.8473	4.56898	14.9792	136.301	8.03689	349.103	53.8046	60.4343	162.224	51.2263	154.078
TCGA-KQ-A41Q	0.640986	0.0156443	3.37349	2.36274	0.00771564	2.41391	0.229286	0.335246	5.47804	99.6657	11.7813	0.804438	190.393	104.393	6.14451	0.384047	32.0067	18.5452	59.0743	2.77536	6.10518	175.808	4.31654	16.384	421.767	20.5056	33.8699	34.4093	1.30461	49.9899	0.845496	3.60208	10.6433	1305.19	2.40083	0.0727289	24.3802	0.179317	2.46483	1.11308	234.009	79.4666	14.2027	21.0983	13.3805	33.5115	150.778	7.42928	206.684
TCGA-DK-A2I6	0.0362809	0.00748193	5.54866	0.5518	0.00331862	13.1085	13.709	1.65822	18.6086	28.2634	15.4018	0.530078	201.779	63.6202	2.39869	0.0284613	52.2258	12.3667	123.177	3.13096	37.635	75.749	43.853	15.8448	8.88654	18.9378	24.2304	16.6101	0.0526207	3.42342	0.660338	1.70265	2.21028	34.495	8.24555	0.0113844	26.5135	0.0277928	7.32498	0.481649	6.49062	14.4563	11.8152	36.6722	14.5844	44.4446	57.8311	7.11232	63.6281
TCGA-K4-A3WU	0.136439	0.0552163	115.243	10.3016	0.0291075	66.2149	11.9277	4.03302	19.575	67.0196	15.0814	6.0191	138.549	57.8689	17.5815	0.155583	166.21	9.58646	35.9435	20	44.7506	169.739	65.9636	13.0647	17.339	18.0362	23.3556	45.8787	0.257297	6.95777	0.739787	6.17288	3.4234	333.079	17.7907	0.324858	40.2653	0.0563452	12.9863	1.1444	24.2394	51.6701	22.1337	32.8271	16.2925	36.3532	99.1543	31.1388	92.556
TCGA-CU-A0YN	0.207445	0.0401489	14.3523	204.717	0.0717262	0.316794	14.1942	26.7214	230.65	39.9072	8.23528	8.16198	171.886	30.1634	0.199953	0.023548	256.77	9.03047	110.957	34.5168	800.444	62.1602	912.502	6.83378	0.0158069	18.3327	59.2955	212.733	89.1581	2.98271	0.873308	0.592718	2.73589	123.445	20.4783	0.0944011	53.9255	0.23848	16.0523	0.9255	19.396	119.376	8.3676	82.0336	6.16044	25.5482	75.6931	0.258917	39.1899
TCGA-G2-A3VY	1.06316	0.176072	240.807	56.4755	0.055079	31.9257	1.00407	3.04586	40.116	264.836	42.2145	3.36203	303.472	180.966	10.271	0.704713	193.951	17.4448	60.8211	6.85765	731.05	443.647	46.319	22.1288	108.14	22.3163	14.3486	151.932	0.495817	5.48094	0.951645	5.78129	14.4433	892.428	30.4308	0.173913	50.9223	0.0921702	12.3922	1.63163	125.977	322.78	20.0472	99.199	27.7749	59.097	304.223	20.8482	477.384
TCGA-BT-A20Q	19857.5	13.0397	306654	132.657	0.144666	88.6659	38.8912	0.768976	0.00121821	675.925	64.2867	5.44278	172.11	450.787	85.0822	0.0198012	103.999	14.8993	84.6507	11715.6	342.397	159.503	2.4015	37.8005	500.652	19.7287	4.81048	82.235	1.72847	1.48154	0.691092	5.22995	49.0486	1602.11	1.30803	0.0339029	54.6364	0.204132	22.5147	0.688351	516062	8746.36	1.46698	76.9882	61.2159	60.3078	40.1187	60.7435	113.746
TCGA-ZF-AA4T	0.191799	0.0111491	3.49011	1.19163	0.00329329	0.586529	0.0213999	0.18443	4.05403	83.6976	15.06	0.12862	186.699	128.451	0.177986	0.111123	27.224	21.1801	93.1574	0.78551	7.083	46.2473	2.65613	12.37	117.949	21.6976	15.9153	91.9904	3.35752	10.2058	0.790392	5.50185	18.7119	584.149	2.00671	0.0157619	9.21504	0.124342	1.28591	1.25753	84.1101	125.727	23.1545	30.0926	12.1372	25.8725	60.9331	1.44244	177.88
TCGA-ZF-AA54	0.00549392	0.00327953	3.41067	1.32008	0.00563865	411.823	165.636	230.574	51.2854	24.3727	30.5686	0.560472	181.014	77.081	54.1692	0.0043743	108.581	9.49644	222.778	1.89126	262.313	91.6943	81.2731	32.6461	0.419431	15.8286	27.4353	6.407	0.0133403	1.46772	0.52629	0.408131	0.994185	0.797311	3.44569	0.00918889	29.4574	0.023278	20.7087	0.519203	0.387611	3.82342	5.82514	228.345	11.1482	74.3811	69.4389	236.274	27.4594
TCGA-DK-AA6W	0.110717	0.00556938	4.62656	0.160908	0.00486138	11.9998	0.134827	0.30648	7.22525	39.0028	10.7264	0.150217	233.335	333.001	2.79972	0.0595391	33.631	20.3268	97.166	1.24061	16.841	61.1752	10.81	18.7047	6.70321	18.671	9.28291	18.0687	0.169112	3.95589	0.963463	2.19524	7.13394	261.498	13.0196	0.0410024	8.23867	0.065486	1.73467	0.161196	12.6847	25.3641	9.3161	57.7722	4.83753	44.676	65.4704	14.4974	55.6839
TCGA-BT-A2LA	0.014237	0.0304161	15.1046	2.5893	0.00801368	58.2081	151.493	5.926	68.655	67.2124	25.6696	1.37158	187.669	124.133	7.19623	0.0284282	234.247	17.9261	116.315	5.31396	97.1992	70.9787	70.9232	38.1951	0.894568	24.8148	27.6339	28.2727	0.0657479	3.09813	0.959151	0.68907	2.17601	100.753	12.0433	0.0792463	17.8368	0.0701842	14.6494	2.44845	2.5488	6.97821	6.36459	118.56	38.4876	75.2191	129.972	20.5247	66.0514
TCGA-FD-A43Y	0.0593054	0.0479956	18.493	15.6147	0.0156768	37.057	34.3161	161.055	219.763	134.705	40.1999	2.20229	216.956	70.6727	6.5732	0.0224363	318.226	16.1332	199.347	31.5172	226.196	147.746	166.95	26.8468	2.98507	24.5756	32.7358	75.5823	0.750355	3.63333	0.906894	0.996972	1.88673	54.2088	2.69411	0.0993072	66.0293	0.170355	77.2284	3.29454	7.77404	63.5771	6.64819	304.641	28.742	66.2028	436.556	15.8535	83.4199
TCGA-4Z-AA84	0.12157	0.00697357	18.4384	0.427318	0.00254286	22.6197	4.97695	0.736665	4.84829	140.097	14.3139	0.216083	132.979	97.6313	4.52552	0.0328009	88.2008	13.8191	109.611	1.83714	38.1914	93.4631	83.6391	26.1927	7.67542	16.9109	7.28512	27.1572	0.114548	1.14009	0.663603	0.898783	4.56103	80.7702	0.675938	0.0163045	8.24518	0.0790171	7.9151	0.288677	24.7752	23.3167	2.94686	80.7088	12.1971	53.0873	43.0227	14.5783	129.795
TCGA-FD-A3B3	0.0121279	0.0328493	11.0755	9.22723	0.010323	21.5155	8.65675	28.1193	81.0381	9.04962	22.7515	1.32717	181.051	42.506	4.13999	0.00823296	50.6772	10.3886	120.072	9.15828	266.298	48.4172	78.5616	14.0253	0.0458211	20.9798	20.2179	70.3635	0.172689	2.44572	0.860212	1.06914	0.987996	26.3041	6.67537	0.0380483	20.5815	0.103106	24.8373	1.10191	1.04254	12.6299	7.69665	39.923	13.5318	61.4517	26.6189	5.43582	12.4435
TCGA-DK-AA6S	0.0693873	0.0164682	19.1987	1.67384	0.00771966	22.5333	1.5271	1.33953	25.7264	72.2605	22.6001	0.51565	157.99	76.0959	4.58546	0.0310537	32.1466	11.1452	61.6402	5.2223	13.3293	60.2092	57.0996	14.1412	8.74081	19.1661	21.4209	48.8794	0.194453	4.60924	0.829091	1.03861	2.85626	315.45	1.41944	0.0949258	12.2392	0.167274	9.06996	0.855315	9.02639	38.3775	9.57261	98.3574	14.4913	40.2623	36.6962	17.5171	46.4735
TCGA-GC-A3YS	0.0681376	0.0166151	17.5816	4.13451	0.00492897	34.0768	34.828	8.28971	36.0791	30.3057	17.1137	0.652582	186.232	54.683	5.51291	0.0109724	73.7466	10.3467	121.868	6.23223	253.269	154.736	63.2975	13.5006	2.43782	18.9354	17.4295	57.9618	0.101045	2.60232	0.705935	2.2485	2.77496	60.375	1.11319	0.0257425	23.3037	0.0515627	24.9275	0.699774	6.18528	31.4389	4.9792	46.6844	11.5928	47.7502	228.336	14.441	47.9223
TCGA-DK-A1AE	0.0693781	0.00278201	8.71828	0.364149	0.00133727	4.96067	3.08376	1.50075	13.818	51.0112	14.6755	0.323625	141	79.4957	1.79298	0.0348051	28.8783	12.9812	113.189	1.96901	9.87877	99.3979	14.5198	19.2568	2.07079	16.7596	7.91137	9.9028	0.0599306	1.50402	0.907728	3.87017	5.95641	143.479	3.70738	0.00397659	8.6604	0.0564689	3.55693	0.402359	15.8834	24.1516	1.93067	36.1466	8.58506	47.7088	823.426	3.71556	56.9926
TCGA-SY-A9G0	0.291134	0.0328613	153.828	6.57796	0.00846052	42.7964	6.17445	1.30412	5.92525	95.6936	14.0322	0.984668	133.22	63.687	13.8453	0.0202241	63.0219	8.44467	59.9489	6.6847	28.0135	70.9477	18.1063	15.7212	8.1784	15.4939	8.3012	40.6002	0.0769158	1.79197	0.660508	2.93438	3.72413	483.964	1.33486	0.0463088	14.8363	0.0742654	9.71865	0.521945	51.8398	89.983	4.24811	61.422	13.0838	53.5059	36.1343	32.3086	96.8684
TCGA-DK-A1AB	0.0265013	0.0277321	17.7991	3.25839	0.00701164	24.5701	18.3717	32.6731	57.4081	26.6895	26.2366	0.862571	152.012	36.526	4.37716	0.0109666	29.2415	9.53165	98.9171	13.4555	104.531	75.118	39.6704	13.1511	0.308703	18.8585	15.3286	35.221	0.128601	1.95971	0.81002	1.15714	2.2849	30.0578	0.688031	0.0288718	19.2489	0.0752404	36.0307	1.16988	4.03268	31.5886	4.19117	86.0032	14.0372	70.9041	136.457	12.5572	22.5381
TCGA-FD-A6TK	0.0257019	0.0403771	50.2092	10.4896	0.0250076	111.16	15.1784	35.444	149.983	32.8874	53.7027	1.65879	211.54	66.6566	17.2723	0.0106565	129.719	10.8513	143.053	29.058	425.713	225.482	292.385	21.6063	6.95676	21.668	81.582	69.8681	0.0897139	4.1244	0.738961	0.677956	1.91899	50.8443	1.81556	0.238364	49.2271	0.123169	92.0426	1.46086	2.99269	43.0793	10.0111	246.957	32.6512	65.913	75.4625	28.0991	51.8958
TCGA-XF-AAMG	0.0887058	0.00190172	1.25302	0.475667	0.00191034	8.59121	0.282964	0.252752	5.46127	40.722	6.76401	0.184126	176.688	64.4667	3.40944	0.0289035	34.8937	12.028	63.987	1.18436	4.16833	58.859	8.36736	9.12124	20.171	18.2403	11.439	18.603	0.151596	5.54559	0.709953	2.87878	3.37065	108.956	0.487906	0.00752477	1.76136	0.122435	2.72089	0.657566	19.6836	24.7142	8.81345	19.7529	4.00338	25.9844	74.5373	10.4818	21.1658
TCGA-XF-A9SW	0.677125	0.393438	528.837	25.937	0.0569944	104.851	21.4253	4.45248	5.67982	122.685	27.9397	2.55106	163.491	99.1637	41.7535	0.0196064	126.026	11.1051	82.5415	93.7624	127.537	155.736	47.2954	22.7539	21.9434	19.0808	13.7887	73.818	0.35774	2.04635	0.684851	3.51335	6.0506	172.116	5.04005	0.232011	37.8666	0.133007	28.328	0.988223	154.01	241.742	5.46482	112.719	25.7734	56.5605	53.5103	43.8582	75.4266
TCGA-DK-A3IN	0.124444	0.0100258	30.1296	5.02485	0.00570902	20.1153	7.0241	3.03136	21.3035	37.8803	18.3641	0.470641	221.172	51.4183	6.22038	0.0178064	49.6715	11.5404	94.0183	2.83368	158.69	111.422	45.4327	14.5734	15.0931	20.5867	30.0711	45.5343	0.12381	6.06574	0.798097	1.05078	2.02495	68.8369	1.95285	0.0277017	24.6541	0.146095	15.3843	1.26531	14.8206	45.5754	5.96428	52.203	13.2591	53.48	62.8166	8.98852	60.7654
TCGA-FD-A3B6	0.0140959	0.00813775	21.8301	5.16702	0.0127631	70.4464	18.0537	36.199	170.32	39.0953	38.5009	0.769411	237.735	69.7866	10.0135	0.00677059	236.142	12.3089	297.4	13.4855	1857.01	92.836	393.279	19.981	0.951012	19.4915	55.2413	43.731	0.0824405	1.90813	0.791958	0.503365	0.941042	5.60115	1.08966	0.069891	24.7802	0.139242	76.4104	1.13953	1.66942	16.2721	4.48184	157.504	16.9978	61.1265	104.814	19.2675	19.2141
TCGA-DK-AA6L	0.0554467	0.0950695	71.2401	40.4008	0.0138209	42.3998	73.5482	104.177	161.334	100.973	28.334	2.12767	338.176	64.1043	7.60956	0.0424081	153.7	12.4354	131.658	46.1492	4221.45	186.394	169.823	12.9203	2.67859	23.3248	15.0582	67.2458	0.216177	0.956599	0.942204	0.999723	5.16777	18.419	5.16165	0.0354916	37.259	0.0464799	81.1227	1.8041	6.05972	85.3437	6.55064	180.832	21.1928	30.5267	324.133	13.2251	227.756
TCGA-UY-A9PB	0.014771	0.0696113	22.4397	12.387	0.0234736	83.1448	62.0815	238.619	142.811	17.5853	34.2822	3.22265	203.049	50.6151	20.1269	0.00725055	106.837	9.10332	133.439	40.3551	643.197	135.646	135.309	15.8184	1.30626	20.6766	62.0477	66.6877	0.0775099	2.7601	0.786427	1.35987	1.10183	13.2653	3.44479	0.102405	42.7593	0.10185	78.1486	1.45984	0.798343	17.4192	8.86526	182.031	20.9947	66.3362	76.178	24.7359	22.3882
TCGA-BL-A5ZZ	0.0812799	0.0197167	25.2128	1.78464	0.00700761	91.6021	1.00088	1.53372	36.2823	67.4854	16.8196	0.74921	136.252	52.1716	38.6076	0.0149461	30.6183	7.5598	80.6185	6.49922	21.9365	96.0581	17.3617	19.3971	1.44161	14.1618	40.8188	49.4494	0.0939111	5.81584	0.598369	0.876666	2.68132	160.514	1.01738	0.0789592	10.4599	0.138391	11.0822	0.820747	11.8267	43.3421	5.99321	117.707	9.56229	44.2245	67.3407	57.373	56.0546
TCGA-E7-A6MF	0.0288401	0.0065213	52.9629	0.286111	0.00413834	9.02176	16.9122	2.85634	32.057	31.6936	10.9028	1.64919	146.65	113.444	0.827477	0.0823525	62.4465	13.2711	73.7068	2.7185	17.998	34.261	33.5765	16.2094	0.212906	18.2897	7.00436	9.95731	0.0479569	1.65311	0.978468	0.635243	3.54428	179.636	12.0784	0.0175132	8.69738	0.039563	4.30211	0.774092	3.88044	8.16493	3.79335	26.3539	10.6522	36.8292	160.195	8.38196	45.2518
TCGA-DK-A1AF	0.048935	0.023013	36.6398	4.68429	0.0139549	68.8329	13.52	7.87089	42.7388	43.4898	24.6973	1.88692	144.709	46.1741	12.3176	0.016749	60.5883	8.45701	74.01	12.5465	71.6389	108.269	48.0635	17.7214	1.72801	17.3808	21.2144	30.5426	0.0751822	3.38071	0.750467	0.716716	3.03045	85.4568	3.43252	0.103589	19.6756	0.118618	21.4821	1.64079	5.99372	38.3035	8.51315	120.554	19.3634	51.8	45.3095	34.2326	31.9119
TCGA-FD-A5BV	1.47549	0.0267675	17.717	1.36318	0.00354272	5.07403	0.0113144	0.147379	2.94226	204.439	16.6059	0.160731	171.143	101.469	4.41595	0.284123	40.9131	18.1589	58.891	1.47746	3.66359	97.1018	4.78673	26.0213	269.427	19.4285	20.0396	56.9758	0.823779	23.1287	0.827043	2.12938	15.2514	5745.28	1.0619	0.13002	15.2765	0.30967	1.67983	1.3414	452.978	255.109	7.97287	36.8875	21.1608	46.7424	73.8118	6.21059	460.336
TCGA-DK-A1AC	0.00909291	0.00155002	2.84911	0.333026	0.00299994	49.7339	2.55387	2.01554	15.6811	26.0527	23.2739	1.16602	158.562	92.3612	7.25965	0.0264226	156.127	10.9763	88.4003	1.85722	95.5527	113.39	86.9509	26.69	1.1206	18.1217	7.58979	11.198	0.0489812	1.53272	0.686754	1.70933	1.5056	11.7515	12.96	0.00531814	6.3332	0.0875982	12.1928	0.557358	0.791474	7.26446	11.2657	49.8208	13.1237	44.8921	51.93	18.3724	12.7952
TCGA-FD-A3B8	0.0383716	0.0388064	29.6449	8.49134	0.01926	85.758	9.15446	15.269	35.4311	32.5459	26.9468	1.52839	124.681	37.0268	24.6443	0.00854454	51.0122	7.88611	70.6217	17.9505	195.704	93.8323	30.2926	13.4345	0.935993	17.7854	17.607	56.9709	0.174819	2.4634	0.662807	1.70957	1.93575	41.1287	3.52682	0.0923261	18.8816	0.135403	27.8943	2.57175	4.6914	43.3444	5.67794	132.341	19.3493	48.6009	48.6511	35.3137	24.1031
TCGA-XF-A9T2	0.0167129	0.00411705	31.6114	0.18188	0.00237106	209.656	29.9047	2.85327	25.5007	37.3656	4.12928	1.72343	151.775	50.364	27.9675	0.0045729	19.6027	6.99336	113.336	4.70587	45.3395	28.9058	38.0858	8.43123	0.0478719	10.8622	11.5998	1.65833	0.0128032	1.15908	0.749423	0.139654	0.724502	13.1553	3.29926	0.0104526	4.20988	0.0346041	14.166	0.0410056	1.39779	1.70285	3.50079	33.6654	1.22175	23.8205	126.63	102.147	6.20094
TCGA-BT-A20R	0.17081	0.0309107	19.9194	24.3088	0.0182371	64.2251	4.60359	4.7868	39.7581	74.6982	31.9245	2.70173	191.15	60.6161	14.8406	0.0148878	124.697	10.1138	79.337	29.5962	84.8965	227.72	67.8554	16.5352	20.0855	19.6823	18.4795	84.7827	0.199213	3.72179	0.671232	3.84336	7.18004	165.622	1.11498	0.117433	23.6092	0.164818	35.2895	0.914975	20.7052	96.4169	10.4861	210.94	20.0931	54.4517	86.9283	27.6466	71.1881
TCGA-FD-A3SM	27.0718	0.4768	101.007	76.7212	0.0683795	41.4969	8.39381	7.6618	111.164	1529.25	129.112	3.35175	282.981	152.985	11.7996	0.0566214	593.669	20.2714	146.077	328.519	520.104	38030.5	11.8386	64.3557	313.492	27.7868	16.5378	112.372	2.72095	1.31606	1.28919	5.01633	281.125	126.824	0.046205	0.508275	88.5402	1.93814	160.138	6.97475	1189.39	644	1.50265	2633.87	108.163	81.2183	4626.86	28.6744	863.608
TCGA-DK-AA6R	0.0126216	0.0233536	9.46603	33.0767	0.036962	8.54931	56.0188	57.4135	387.63	35.9231	20.6146	1.52387	265.893	59.0263	0.542753	0.0156429	139.397	15.3747	194.961	10.9948	2690.53	43.3833	1059.19	14.4302	0.0529121	26.7642	107.935	108.516	0.656652	4.52751	1.13643	0.373319	1.48973	15.4198	18.2778	0.0407968	38.4628	0.198379	45.0381	1.15857	1.25475	21.2092	14.7148	110.405	17.8802	68.6686	42.0406	2.4009	12.4999
TCGA-2F-A9KW	0.186724	0.0745495	10.6422	7.8432	0.0302576	32.186	3.07817	1.337	16.6053	79.9599	19.182	1.85652	209.79	112.535	21.3899	0.179067	59.7977	15.3296	111.601	4.84504	12.3435	583.706	57.6157	32.8511	106.698	19.1153	41.5391	44.2246	0.220625	11.5476	0.884183	3.93638	5.86073	145.754	10.8162	0.205917	33.8695	0.080341	4.48975	1.12593	46.0607	25.8548	10.6112	37.9075	23.6718	43.8122	88.0326	21.0852	107.002
TCGA-ZF-A9RE	0.0565863	0.00814634	20.7952	3.70447	0.00412905	7.65984	14.7754	5.44512	43.4058	81.4177	12.4183	0.469657	178.915	53.5795	0.639299	0.050339	60.2912	13.1035	93.5597	3.0174	193.068	43.6254	82.3829	12.8266	0.817646	18.5615	7.34364	42.6445	0.491764	2.28522	0.980577	0.553152	8.21879	29.9735	18.2199	0.011362	11.7826	0.141542	7.7328	0.621108	8.7786	19.8861	8.53608	45.556	9.8855	42.9396	121.723	4.43888	57.9559
TCGA-XF-A9ST	0.0353638	0.00206791	5.1093	0.204397	0.00119214	12.4252	15.1322	0.625147	4.94368	15.6206	11.0387	0.221102	198.169	108.959	11.8843	0.0605834	35.031	14.1229	118.062	0.626972	9.65368	40.6224	25.1604	21.1757	0.512496	18.2247	16.7242	21.1517	0.0844506	2.95015	0.717863	2.61738	1.04862	12.725	18.5112	0.00494405	6.86794	0.0189035	2.1017	0.0590106	3.51567	5.98228	2.83083	12.2649	8.44725	41.9323	33.3671	7.39171	20.5616
TCGA-HQ-A5NE	0.0274523	0.0247155	21.6152	11.5022	0.010315	17.2257	71.5082	29.2029	102.719	29.1871	24.5064	3.05826	212.956	47.1603	3.20791	0.0332842	68.152	10.9332	145.69	12.6353	556.005	79.5852	180.996	13.1229	0.841985	20.1376	43.4946	46.8234	0.115446	4.3136	0.871321	0.880468	1.39053	24.1796	7.8309	0.0349507	33.0619	0.0412381	37.7741	1.26626	2.47838	21.0312	11.301	72.1654	15.3992	45.8092	101.27	5.01272	42.8941
TCGA-FJ-A3ZF	0.200092	0.00382047	11.5608	2.57949	0.00409743	8.46283	0.229016	0.492854	6.39131	72.56	12.2886	0.454149	173.228	112.481	3.01012	0.141438	55.7652	13.8742	55.4222	2.25303	8.93777	111.943	20.5187	10.5007	34.7377	16.2676	13.4322	32.21	0.400573	9.4019	0.758344	3.56524	4.27939	458.403	4.32191	0.0209428	7.44051	0.111179	2.96911	0.287278	42.0221	43.592	20.5622	23.4102	8.44261	32.0984	62.1594	9.28431	65.0129
TCGA-XF-AAMT	0.0152181	0.0234187	8.19004	3.46017	0.0107132	24.2136	30.7866	16.6548	98.3799	28.3245	24.3269	1.3482	205.125	68.3468	4.17572	0.0100643	47.6355	11.3795	132.451	19.8118	138.955	79.5222	80.4484	19.7832	2.72086	21.1692	40.4868	39.2036	0.193015	3.78361	0.908179	0.813861	1.72897	41.6721	0.537686	0.0577828	24.769	0.0989749	38.8605	1.00496	1.4322	17.0548	8.07835	87.0039	16.2619	67.5578	119.916	14.0685	22.6683
TCGA-XF-A9SL	0.186921	0.140423	301.071	11.3449	0.0195768	93.1915	10.6569	4.07916	10.3521	116.267	24.7217	1.83505	157.497	79.7338	22.4954	0.0223304	103.709	11.2577	78.2942	29.4868	80.1681	133.404	50.8246	23.0951	8.10582	19.067	6.49272	30.5788	0.147407	1.24149	0.616523	2.44293	5.43753	164.701	3.46455	0.123083	30.2098	0.104909	22.7885	1.86653	33.0471	112.243	4.40542	93.6297	25.3473	37.6305	57.9285	48.988	81.8079
TCGA-E7-A7DV	0.131558	0.221933	26.1113	53.9839	0.158944	344.15	100.644	1670.18	255.454	171.849	64.274	2.59896	271.867	65.4665	121.22	0.013412	429.921	11.5631	209.665	639.212	5670.95	8294.72	545.278	30.2492	18.4222	23.6731	136.085	52.5446	0.25388	5.18427	0.646264	2.57576	3.89092	15.0752	3.13664	0.87235	100.042	0.442189	240.063	3.74834	8.33706	97.647	7.94888	648.308	43.9111	63.0467	303.204	99.4998	73.7948
TCGA-BL-A0C8	1.3065	0.264547	3639.78	42.6027	14.7188	70.847	14.361	80.0961	25.5205	77.7063	18.1243	48.2514	115.385	49.761	13.1084	1.35747	91.7342	5.58235	32.6512	27.1572	707.443	727.94	237.469	9.13922	8.32148	10.4216	13.5225	84.308	0.118919	9.26812	1.05848	7.03936	3.55182	841.221	163.919	0.686627	53.681	0.0493049	26.8126	0.0579353	55.4696	52.3359	130.215	36.1656	5.92551	54.7187	112.158	19.0664	34.8051
TCGA-XF-AAME	0.0753684	0.052116	23.2704	6.52189	0.0230942	47.4455	7.86871	5.75752	26.4124	53.5856	15.8004	1.38372	116.492	41.5214	13.2617	0.016734	70.5715	7.92766	63.8755	23.1585	70.9633	103.964	39.5443	14.1413	1.9532	17.0706	10.7629	45.1683	0.173367	1.84984	0.638641	1.85047	3.21336	86.4645	2.18087	0.126776	19.3513	0.11622	17.5806	1.20955	8.8023	48.6966	5.13476	114.854	14.2897	41.7347	65.7721	22.4652	40.5643
TCGA-GU-A42P	0.228912	0.0738165	24.5316	4.44883	0.019989	18.716	0.473356	0.755197	23.3858	55.0955	21.9163	1.49716	254.495	139.263	5.72154	0.251125	104.414	19.3622	69.4531	3.62266	59.5128	101.271	30.8851	18.4759	32.7723	22.3427	28.1753	99.2482	1.09138	11.3907	0.961818	6.80894	10.3964	270.561	16.0481	0.0723857	16.8097	0.138177	5.2307	1.38105	30.1016	52.618	20.1258	36.6701	20.1225	35.9703	41.4557	10.7958	102.392
TCGA-XF-AAMH	0.110294	0.0394596	314.783	13.9718	0.0168106	365.052	334.082	36.1221	312.915	91.2203	15.3676	14.8315	298.161	85.8969	49.3897	0.0227081	118.363	11.8316	174.952	161.957	1358.05	58.8861	323.052	34.8838	0.0384127	18.3272	82.2562	12.1392	0.0490057	2.38635	0.836112	2.01245	0.852711	34.0405	9.22381	0.111222	46.3933	0.0396683	72.6646	0.487939	4.64055	27.71	9.79074	211.413	8.09499	23.99	650.925	172.629	34.6887
TCGA-GC-A3BM	0.0162366	0.0242376	19.736	3.27779	0.00596181	60.5385	10.3209	1.33308	26.6839	58.4291	21.621	1.49595	144.727	116.111	13.453	0.046516	159.399	14.3069	73.7219	4.29501	11.3093	51.422	23.5379	22.2425	2.49021	19.8043	41.0723	81.7215	0.164096	6.70342	0.988128	0.553438	2.52147	444.234	17.7421	0.141064	9.02736	0.131026	5.90872	2.30346	3.69713	20.4076	9.64665	84.8871	26.0573	70.484	57.8005	24.1357	48.3679
TCGA-CF-A9FL	0.700273	0.0151743	7.77524	1.77774	0.00646982	3.72906	0.172434	0.306425	7.37503	145.542	13.1401	0.380607	155.696	75.6645	6.22956	0.141386	35.8257	15.6322	53.7905	3.14098	0.449388	127.592	7.63007	18.4353	307.899	19.3863	36.065	40.6919	0.633278	48.5139	0.823193	1.195	13.0742	3295.32	1.62192	0.123648	15.5503	0.233439	2.9445	1.36912	250.955	152.173	8.34064	35.9722	18.323	44.0069	117	6.4803	153.002
TCGA-G2-A3IB	0.0511836	0.0120498	16.4689	42.8598	0.010261	0.528243	19.5404	31.3065	385.664	43.1239	11.8854	2.30689	180.943	31.1803	0.0648678	0.0157147	59.6687	11.0121	133.723	21.116	2550.46	48.9344	592.562	9.90616	0.0304972	26.9294	15.9928	39.1319	0.338094	1.3412	1.16249	0.400896	2.09881	31.5453	4.7907	0.0191419	25.0773	0.339332	54.5839	1.75676	2.80045	40.216	6.0105	70.3094	14.3258	37.8454	182.812	0.390503	11.8419
TCGA-E7-A6MD	0.193022	0.00947492	11.4665	1.29002	0.00545531	14.2379	2.1066	1.10359	9.47342	139.943	18.0287	0.389329	175.877	77.9342	5.39497	0.0435814	44.2333	13.1803	65.2245	2.46864	11.4482	73.0219	18.7069	23.3716	37.2199	18.8765	10.8186	9.95519	0.16564	5.65155	0.748913	0.737372	3.80421	74.4409	1.00581	0.0281607	14.4653	0.0994941	4.93691	1.62386	41.5181	48.1865	5.84869	53.4592	14.7477	42.0587	137.174	12.5489	117.615
TCGA-XF-A9T3	0.0746131	0.0679129	91.888	4.81144	0.016692	85.7033	35.3967	13.7001	53.6876	52.6883	43.9289	1.33904	227.732	89.8284	13.8772	0.00957435	144.276	13.8631	172.858	36.441	466.977	96.3999	120.765	25.1267	5.48168	21.9606	33.4325	47.0529	0.0820281	2.01649	0.769738	1.16772	2.75145	42.6337	0.689708	0.0947668	29.6882	0.141241	57.8543	1.62614	8.13839	93.7729	8.59982	147.983	25.9562	60.3568	62.4091	28.0276	58.0623
TCGA-UY-A78L	0.0502401	0.140768	2.39812	185.938	0.0164645	5.37002	68.7282	253.209	201.778	50.319	24.6469	4.72894	280.627	49.2612	0.370912	0.0147593	139.595	13.9267	122.192	91.0682	541.056	83.323	641.139	14.5101	0.0691242	23.8694	11.873	47.2655	1.37881	0.281751	0.764606	2.1794	11.2766	10.8221	30.1491	0.01142	79.9473	0.210601	12.6807	4.35658	2.54401	6.23989	3.77838	67.5601	18.6521	38.2941	22.2067	1.52933	73.809
TCGA-CU-A3KJ	0.0246939	0.0523316	3.2383	25.0501	0.0290261	5.6843	57.6371	914.315	224.316	87.4998	25.8617	4.14812	230.687	61.0919	0.68499	0.0327527	310.47	15.0239	116.193	25.6005	571.174	53.7554	822.238	13.0209	0.0861447	23.0828	45.2189	217.035	7.28069	1.35098	1.02071	0.434442	4.63042	27.8109	56.715	0.050164	61.7694	0.159177	17.221	3.13196	3.00126	28.2459	14.3318	110.904	16.5558	94.3996	24.2705	1.86566	51.5736
TCGA-GV-A3JZ	0.358564	0.00671928	2.45048	1.49523	0.0108919	5.18181	0.164781	0.39048	17.0857	71.3894	16.8982	0.540134	219.098	89.8043	2.61391	0.104069	43.9094	14.8262	60.7713	2.93196	9.6217	239.837	12.1443	13.4186	160.142	18.9844	36.262	26.4833	0.537295	28.1255	0.796172	3.09139	13.7606	562.938	5.35771	0.0402294	12.1548	0.230726	5.44083	1.1522	74.6723	51.2193	14.2903	50.9852	10.8997	29.0852	158.829	5.40274	74.5432
TCGA-BT-A20O	0.0255164	0.0215404	13.0724	1.81135	0.0218226	79.455	9.93712	55.6491	69.1044	45.7561	33.0016	0.978117	96.9413	38.0555	16.4347	0.0116798	104.175	8.82803	83.1856	17.1872	338.425	641.647	42.5401	21.9807	0.642517	16.8508	9.88781	31.5335	0.0745463	1.09521	0.647692	1.89755	3.4766	10.2486	2.81739	0.0728706	25.5267	0.158423	36.4816	3.50321	3.05303	15.0554	2.07816	299.231	23.2188	41.7575	198.62	31.4694	27.6233
TCGA-FD-A6TB	0.281997	0.327442	99.5777	20.2341	0.0842332	59.3651	4.77464	8.41108	64.1735	208.984	39.5821	4.47583	212.555	109.063	18.773	0.133596	202.469	15.7514	93.2243	43.7161	249.477	305.765	39.1164	26.5524	27.2026	22.8001	26.1795	86.0353	0.486696	2.80698	0.960283	3.17686	9.06577	204.854	3.59004	0.784999	36.9231	0.25791	24.1081	2.91077	47.7301	63.0391	6.41178	187.924	34.0931	52.96	268.15	28.5597	204.724
TCGA-DK-A1AD	0.713837	0.0502479	63.329	3.1548	0.0110328	8.92785	0.144876	0.448696	8.79929	172.828	15.6801	0.587159	157.235	96.249	4.47259	0.159236	74.9943	16.6619	64.7568	2.72815	43.217	75.5921	11.9509	21.0561	29.2242	20.6209	11.1977	49.8319	0.724222	7.33555	0.826279	2.62375	9.12698	2443.35	4.78608	0.151818	18.3103	0.251785	3.51611	0.901634	77.0698	85.1816	10.1674	63.0942	20.9885	40.8726	36.3819	11.5265	228.005
TCGA-G2-AA3B	0.228292	0.044012	15.6087	6.09561	0.0118518	21.1399	0.337504	1.87006	16.5743	64.6248	19.9819	1.06485	178.118	69.981	5.56288	0.114498	58.7456	13.0358	66.4847	7.0592	52.4526	188.363	52.0618	18.21	44.8295	20.7202	15.6759	47.2306	0.169266	6.55702	0.767451	5.01542	4.91769	373.357	5.56577	0.0695758	22.0911	0.129999	8.1607	1.12414	26.3241	66.1851	20.0327	59.1794	19.7862	37.2291	51.7938	10.6663	93.0756
TCGA-FD-A43P	0.0355725	0.0346423	12.0177	8.15642	0.0289242	57.3212	2.67192	8.88076	48.8472	64.7335	22.9146	2.24775	229.748	105.16	8.70556	0.0980295	93.0702	17.3099	80.1542	6.2212	235.943	139.769	65.5985	14.4985	8.59331	23.3535	10.2447	85.2977	0.147784	2.54357	0.778942	4.19297	3.21838	46.7023	28.7399	0.0552888	24.3609	0.0450296	13.3506	1.67099	4.87126	15.1244	13.6139	66.5994	15.532	48.434	33.7993	28.1471	54.8722
TCGA-ZF-AA51	0.138655	0.00859057	2.04298	1.63581	0.00298766	1.87213	0.0304375	0.226427	4.08044	145.058	12.7598	0.147419	136.47	72.0359	1.86108	0.0792614	21.3886	17.2234	67.303	1.45473	4.49747	72.645	3.23111	14.7191	103.596	17.5187	16.8841	40.4924	0.906952	7.39426	0.631255	1.01034	18.1029	497.497	0.816462	0.0249086	11.7198	0.26197	1.18872	1.9359	39.5199	63.7202	3.73682	42.5373	14.8097	28.3294	37.7154	3.99813	208.906
TCGA-ZF-A9RL	0.583158	0.00831833	19.5679	0.203733	0.00509041	7.00484	0.176987	0.471369	1.81659	70.3622	18.2739	0.317101	191.839	106.73	5.18383	0.10307	46.6438	15.6147	56.5244	1.56277	23.856	64.4468	0.620769	18.9453	22.7464	20.4142	7.36971	23.978	0.130983	7.28437	0.900518	1.60683	9.29603	438.825	2.10234	0.0306322	17.6298	0.0484243	1.77019	0.740853	100.454	37.8442	9.85254	20.6511	17.2074	42.3364	80.345	9.44377	121.277
TCGA-DK-A2I2	0.132925	0.0116855	1.80744	20.4395	0.00997085	2.51249	5.1097	4.12666	133.435	129.929	11.0447	0.933505	155.377	51.4166	1.99376	0.010545	79.043	11.3186	124.958	12.9894	40.9605	71.445	312.77	12.2031	0.741577	18.4821	26.8973	74.9189	0.935674	2.28952	0.733382	0.38635	2.93594	67.9785	1.37902	0.035826	25.5879	0.119701	13.5439	1.27422	58.4707	69.6636	5.48271	118.11	9.10591	41.455	54.8624	1.53491	69.2538
TCGA-R3-A69X	1.22112	0.376017	430.819	35.2067	0.120692	67.7977	18.149	14.7001	83.2	251.077	44.9428	6.94497	234.66	89.4176	15.3734	0.132165	473.471	14.3827	96.7122	97.5254	547.625	1025.93	40.0714	23.2414	90.8383	19.9124	27.7461	80.1813	0.293823	3.46385	0.980521	4.77224	19.737	125.189	5.29348	1.29189	125.736	0.166351	51.451	3.08342	139.9	237.567	7.82907	267.856	45.6552	43.4617	649.978	32.3672	430.774
TCGA-K4-A3WS	0.153314	0.0185007	27.2154	2.44226	0.00765523	29.2133	0.618682	0.927132	7.53935	88.8491	20.9663	0.467619	159.389	88.0674	10.0717	0.0219757	45.811	12.2832	63.9142	4.55463	11.4616	101.688	10.6425	17.8427	32.7966	20.0021	10.9843	42.0302	0.149104	3.49734	0.759826	2.71269	6.22094	304.462	0.468533	0.048029	13.8254	0.0696114	8.58519	1.35101	28.4004	88.5075	6.41535	72.4726	20.9881	52.3148	49.185	28.0636	81.3199
TCGA-XF-AAN8	0.0346618	0.028856	20.573	4.26374	0.0158562	203.425	91.0824	5.62083	17.0993	71.5495	31.9184	1.31317	102.858	44.8972	50.8741	0.00126323	145.686	6.14858	83.5987	81.1555	11.8962	145.424	10.0177	34.5397	0.377961	17.2364	8.71661	24.8042	0.0767897	0.299884	0.624213	0.904569	3.04557	17.6546	0.000126647	0.114507	5.70799	0.229632	65.4664	1.7031	3.62101	22.9934	0.991881	756.84	31.7597	70.2923	52.4182	137.607	26.5193
TCGA-E5-A2PC	0.372469	0.0572872	15.6645	12.3177	0.0112695	10.1551	4.58996	5.77319	74.0234	267.979	52.3738	0.98662	261.601	91.9959	2.93915	0.110954	57.1273	19.1267	133.035	17.0461	125	520.647	45.7708	24.8059	77.4428	24.0265	31.8835	56.6328	0.345836	6.29647	1.05463	2.11507	19.4002	77.7374	0.646331	0.0684424	50.2694	0.176791	38.8557	3.87309	71.069	175.864	6.03961	122.788	52.8207	66.1642	715.839	6.84017	152.22
TCGA-E7-A5KE	0.361903	0.0324432	140.718	18.3484	0.0134277	55.4498	29.5545	7.40492	27.2888	157.247	30.0741	3.9248	296.413	188.506	12.0917	0.151884	235.052	20.3338	86.4108	6.90303	348.285	189.142	118.408	30.1974	19.0276	22.4125	25.1139	32.469	0.253382	5.58588	0.916633	2.7604	7.05324	109.708	13.671	0.0977452	39.5597	0.0598072	15.342	0.783318	47.0905	50.1104	11.9814	91.9349	19.6462	53.5286	82.4234	30.9388	258.449
TCGA-4Z-AA7M	0.266574	0.0150439	12.0078	3.23935	0.00676277	3.33539	0.464615	0.746769	5.80127	125.464	16.861	0.319661	224.697	117.709	3.08144	0.133077	70.4317	16.8576	58.6903	1.46503	64.2165	126.29	8.34794	11.724	54.7082	20.2795	8.89752	55.8848	0.250936	7.20098	0.855349	2.78854	3.78145	89.1704	4.32106	0.0168531	9.27532	0.0391085	3.52545	0.850106	37.1901	57.1879	8.74355	28.3455	14.0176	43.4552	27.7328	5.08136	108.784
TCGA-DK-A3IQ	0.20972	0.019119	114.489	10.3296	0.0127223	85.1335	15.3333	3.03123	18.294	43.568	22.2613	2.47197	153.322	38.4452	30.2716	0.00229304	45.643	5.53625	53.3894	39.5515	7.72489	99.6069	10.9471	13.5949	4.72441	15.6234	33.1798	22.796	0.107884	2.81961	0.599092	2.94925	4.45416	231.67	0.099448	0.0654742	12.6116	0.0737568	45.8009	0.347748	33.6846	130.13	2.40985	245.286	14.0593	79.6837	113.411	80.3899	36.6301
TCGA-XF-AAMX	5.11511	0.00996177	85.5476	17.1562	0.0125604	4.65559	0.868573	0.423388	15.2997	300.794	11.5504	0.991017	205.224	72.7325	3.76857	0.414057	60.5184	14.5062	60.0423	3.32241	140.606	371.329	19.5706	12.8782	283.647	18.4124	37.0879	52.0368	1.18195	22.2666	0.788847	5.12813	13.9729	1476.24	16.9958	0.307317	19.3196	0.166669	4.52171	1.09985	371.838	316.09	8.66807	45.8223	12.421	26.7533	238.386	5.11196	467.579
TCGA-XF-AAMR	1.48551	0.237508	656.114	21.6385	0.05261	53.115	43.4675	6.0615	12.0579	211.534	28.6421	3.12188	212.393	106.048	19.5325	0.0884471	119.078	12.0469	78.8502	66.9474	169.081	300.79	22.815	24.7755	45.7784	19.894	15.6535	66.2684	0.291059	4.22986	0.864478	4.31285	16.2755	545.415	6.67762	0.157015	59.0982	0.103295	23.0693	1.64194	291.816	323.87	6.4093	110.232	25.5665	49.7489	157.742	30.8338	168.811
TCGA-SY-A9G5	0.0102111	0.0206041	9.11254	4.67322	0.0255776	99.6672	50.4818	54.1463	143.517	33.6167	40.5998	1.49863	236.777	84.9667	15.1217	0.020615	110.483	15.6975	110.077	14.5902	177.642	126.081	155.14	20.5873	1.16994	28.89	99.2888	22.3818	0.158417	5.15055	0.942302	0.536982	2.14985	15.0521	12.8642	0.0829139	26.1643	0.0897744	51.307	3.60599	0.860688	13.4613	11.0992	281.128	30.6008	59.0311	74.3497	29.9815	18.0086
TCGA-BL-A3JM	0.026349	0.00603935	10.0601	1.04216	0.00449638	59.6927	0.219945	1.65339	22.6067	37.86	6.71472	2.08105	215.002	76.0222	15.5213	0.0964197	28.7424	10.4511	60.1457	1.75413	58.8614	73.2994	8.69011	7.61571	3.39246	11.3255	12.812	9.89938	0.0329434	4.89196	0.779584	1.18086	3.02742	26.4301	51.6216	0.0281745	10.7055	0.0144818	5.52398	0.0912421	2.10621	5.5063	12.2036	34.5114	1.66754	37.4848	108.801	60.0398	19.181
TCGA-YC-A8S6	0.0309753	0.00900041	14.4777	1.6588	0.00667024	42.5123	7.10425	2.01425	17.4498	37.161	14.1003	0.916006	146.177	61.8068	6.61391	0.0176378	38.3461	10.0563	76.8459	4.14231	5.86485	55.5783	32.1151	17.3583	2.00345	17.9602	14.4766	13.744	0.0636227	3.97815	0.728446	0.189119	2.10203	40.9695	1.78696	0.051249	10.7406	0.0684055	6.72084	1.35853	4.50836	12.0715	7.45872	55.9858	11.433	36.2734	49.2317	23.55	29.887
TCGA-XF-A9SI	0.0555569	5.21743	865.061	39.9821	0.0150201	313	0.887522	72.5327	167.295	78.2625	10.845	3.42136	148.518	46.3491	29.4222	0.188406	315.173	10.2723	50.2358	72.6845	58.2809	41.4804	512.661	9.47138	0.415176	23.6449	7.10634	24.4592	0.623711	1.48993	0.700025	14.1974	0.660364	147.661	120.936	0.106109	27.3164	0.488626	32.4113	4.30964	74.7156	3.09259	63.8692	42.4059	7.4255	38.7393	52.7357	119.478	4.5431
TCGA-GC-A3RB	0.0227945	0.00374099	9.43422	1.67573	0.00317835	22.8728	86.6657	14.4647	79.0765	17.7986	14.7564	0.4701	249.439	103.968	1.53289	0.0193797	88.4953	17.1163	161.311	2.19307	471.798	88.4125	85.3319	17.6075	0.652713	22.2745	19.4641	12.3915	0.0736329	1.39979	1.03753	1.2727	1.81982	8.61644	35.0373	0.00424293	11.385	0.0267488	11.3264	0.377561	2.13814	9.42986	3.53473	42.6102	11.4063	61.9077	293.354	10.9115	35.1567
TCGA-CU-A72E	0.102167	0.0111556	27.6692	19.651	0.00765328	15.4618	79.3123	31.0682	78.1424	205.349	22.8685	1.60756	211.357	56.7991	0.691807	0.0238406	93.8423	13.0006	120.366	20.481	299.429	89.7581	323.551	18.0029	0.795147	21.0115	15.6928	36.0378	0.19436	1.38066	0.852253	0.592333	4.79263	57.469	7.32029	0.0263772	34.9063	0.11346	24.497	1.78495	11.4593	51.8451	7.23856	106.784	21.3966	45.3936	290.679	6.59213	51.465
TCGA-YC-A89H	0.0890885	0.0158283	44.7329	8.69303	0.016901	30.359	23.2064	5.86361	66.1748	59.0028	26.7499	1.4145	269.369	86.1437	4.92882	0.0679995	133.843	15.4749	94.0781	9.96103	188.441	122.75	167.284	23.6789	5.97298	26.5785	39.465	29.5362	0.188906	10.0619	0.952368	0.82211	3.0903	140.759	16.6549	0.0951227	45.9367	0.105052	19.5189	1.72815	19.2068	42.0797	11.9041	81.0375	32.4917	70.5225	130.786	11.4435	75.7452
TCGA-XF-AAMJ	0.416166	0.0260382	29.1769	3.42563	0.0084538	20.8698	0.539921	0.714396	4.50091	69.7713	16.3833	0.581713	141.128	47.5716	13.2728	0.0166541	21.5819	8.40865	52.668	5.11401	6.13124	107.502	2.62251	13.8381	30.1668	16.3041	15.8034	30.3453	0.225121	7.20818	0.700125	2.87636	5.19434	555.86	0.507544	0.0939209	14.8611	0.118903	6.71238	0.638547	53.7831	73.2069	4.52273	64.8937	14.0694	47.0903	78.867	20.9065	108.776
TCGA-K4-AAQO	0.330067	0.0312931	84.0563	4.35829	0.00749175	21.4218	3.17026	0.706048	3.48146	100.316	18.6235	0.813947	160.863	105.584	10.6555	0.0611496	70.7278	12.5872	57.7474	5.06412	32.6806	98.2228	6.55643	19.7104	40.9008	19.2416	8.16587	50.9012	0.221945	3.58663	0.728845	3.14408	5.57686	794.121	3.13232	0.0465726	16.7103	0.093502	5.51173	0.793368	78.1354	128.115	5.73193	42.7943	23.5169	53.4056	67.3167	20.521	122.578
TCGA-DK-AA75	0.0512826	0.00172048	1.44802	0.482843	0.00281908	16.942	0.274348	0.394112	14.7848	161.864	20.3374	0.203665	243.213	189.425	2.72847	0.0218419	104.712	17.9558	137.825	1.91353	7.23775	58.939	48.8126	21.5962	20.2913	20.9101	11.601	8.04832	0.0655743	2.38834	0.662923	0.617448	3.45344	49.6393	0.0388111	0.0097009	6.24285	0.149899	4.85377	0.727768	9.75241	25.514	9.08564	109.902	11.0998	38.9746	38.9101	16.9652	40.7095
TCGA-FD-A3SJ	0.290616	0.0404648	29.9123	6.40398	0.0237277	46.4051	9.8709	2.05209	10.9057	84.0602	37.1489	1.5577	255.727	169.561	7.73577	0.0545792	162.202	20.8501	102.457	7.9231	415.284	380.209	26.4029	30.883	26.9609	25.083	13.3155	57.0048	0.519379	5.4421	0.860086	3.26971	8.56743	98.136	6.30527	0.0523259	29.9366	0.0822385	11.3182	1.31057	45.9614	94.2995	8.52565	68.4233	30.1987	48.572	140.168	24.7468	179.407
TCGA-XF-A9SP	0.584413	0.0885397	173.513	13.0834	0.0185115	34.6756	1.60639	1.88416	11.0222	121.519	29.2427	1.0149	187.913	85.9266	13.3253	0.0414617	91.0925	12.7991	82.8978	12.9768	59.7172	131.04	37.5776	25.6134	26.4077	21.1628	13.6454	47.5683	0.20155	3.32305	0.734181	3.26511	5.24006	443.806	1.45753	0.18804	26.484	0.125168	12.8314	1.552	51.2428	115.792	6.81991	111.969	30.5208	48.0696	48.095	17.0547	171.383
TCGA-UY-A8OD	0.416238	1.38105	122.84	3.40793	0.0598098	39.164	0.716055	0.88542	48.7363	130.335	35.2311	0.565845	208.037	154.25	1.53582	0.0481761	156.4	20.0621	94.2271	17.0182	31.236	98.5443	46.9792	28.351	15.9358	26.593	6.32706	147.245	1.63313	1.66336	0.798297	4.29981	14.4687	714.401	3.49908	0.449847	45.2282	0.216535	20.024	2.48158	131.621	670.342	16.7566	180.672	42.6868	71.3597	40.2561	23.0301	185.506
TCGA-HQ-A2OE	0.0778943	0.0106198	19.3349	3.38378	0.0124228	35.2551	0.739693	1.15147	49.5107	65.8994	17.5227	2.41377	265.146	188.4	4.65493	0.412669	61.9674	20.4968	73.397	2.20633	107.034	93.9603	11.1053	25.473	5.13784	20.7782	27.3939	22.8786	0.275366	9.89211	1.14804	2.95865	5.04495	89.5436	65.0563	0.0268443	13.9591	0.200947	3.55428	1.02129	9.30005	40.2529	13.7928	60.5018	18.0372	68.7965	176.955	15.2505	104.655
TCGA-DK-AA76	0.108491	0.00958406	22.4554	1.29502	0.00582617	7.21507	0.829006	1.83108	23.7891	90.5154	23.1953	0.687466	166.966	130.613	1.99483	0.0996805	120.229	15.2547	75.6054	2.84325	23.2654	82.8194	34.2301	17.0386	8.46242	19.1241	14.9602	30.1018	0.208754	3.93626	0.831511	2.01142	8.46708	131.258	6.72586	0.026528	6.94685	0.0507882	3.55366	0.654541	23.8019	30.2234	12.0006	52.7004	15.4741	27.2071	142.047	6.36746	120.058
TCGA-KQ-A41O	0.255629	0.0215407	19.977	1.37037	0.00307402	7.64435	0.0929379	0.224729	3.05968	140.988	15.8096	0.170959	178.39	118.874	3.82272	0.10228	62.2552	16.9723	67.2843	1.48745	8.72065	55.8598	6.8907	24.4884	62.5439	19.4892	10.3139	44.1229	0.348618	6.38849	0.800604	1.77342	9.24634	1940.11	1.29137	0.0508126	11.9045	0.274638	2.12881	0.583658	61.3275	116.054	6.12347	43.6074	17.891	52.167	41.2004	9.37522	257.572
TCGA-BT-A3PK	0.396119	0.0383636	15.4314	11.0038	0.0138253	5.21	2.16587	1.98915	65.2216	173.159	19.2186	1.0354	175.008	62.3977	1.48878	0.0962214	103.844	15.6046	92.6809	8.65031	27.1167	73.3484	102.045	15.8429	16.5679	19.0937	72.8847	152.157	15.1005	10.2958	0.82845	2.15979	10.5252	520.902	5.92506	0.306618	42.7122	0.590966	6.42955	2.03272	87.2904	147.442	9.08674	91.5264	18.6879	35.2754	100.444	3.67067	248.605
TCGA-XF-A9SY	0.00806588	0.0152535	6.65775	3.43669	0.0109558	42.5851	10.6318	15.4462	74.0649	12.3401	31.0963	1.96557	167.473	50.6705	12.2728	0.00757762	28.2012	10.132	151.48	15.3504	244.25	85.806	93.8527	17.6122	1.105	18.4724	51.1548	42.3191	0.0602242	4.29448	0.772373	0.782932	0.723112	13.5302	1.2572	0.0377592	29.5826	0.0594959	34.4865	0.997983	0.86371	10.9582	10.0114	67.0003	21.3193	80.5614	30.2763	18.6822	8.98813
TCGA-GC-A3OO	0.356503	0.0570369	147.132	21.0289	0.0213662	59.2434	10.6014	5.78268	35.6897	79.7745	20.4557	2.22496	208.086	55.4471	9.76235	0.0555438	90.0161	11.4753	69.9925	10.0044	536.314	175.822	55.7571	12.3963	12.5377	19.9574	18.029	87.3008	0.1786	5.00523	0.819711	2.49186	7.82936	279.322	29.2226	0.15334	33.0214	0.21304	22.176	1.38303	46.7523	131.599	10.1594	81.2751	16.3291	48.0666	188.117	19.3932	138.769
TCGA-K4-A83P	0.0579304	0.0424252	32.3012	9.04445	0.0217992	53.7582	8.72605	6.88175	26.3747	41.3058	19.2692	1.64737	121.233	47.7437	11.5829	0.0380627	58.5068	9.24593	49.2386	11.8141	55.3938	124.877	47.9287	17.4385	4.0137	17.9039	9.37601	30.8403	0.108222	2.97719	0.69615	2.55194	1.96936	139.515	7.18042	0.120953	26.1658	0.110089	18.7771	1.74886	7.52619	20.7735	11.6752	67.498	18.6978	36.4422	69.9494	23.2636	30.4019
TCGA-BT-A2LB	0.123233	2.16223	459.91	430.572	0.600763	0.810915	69.2084	53.8908	1015.75	214.778	17.4811	37.9807	157.242	44.7554	0.00854692	0.12298	695.914	17.495	86.538	133.25	6911.44	31.66	3969.36	13.7078	0.390167	27.4236	155.092	221.655	3.69908	4.38854	1.13217	0.600958	4.49165	793.925	151.026	18.0867	159.974	0.154578	56.0334	5.4146	15.3957	56.5689	49.5581	341.939	36.9812	30.9952	63.1192	0.34893	42.1383
TCGA-YF-AA3M	0.0471499	0.0752869	26.672	23.8423	0.0222743	97.1697	38.8734	33.771	182.217	50.791	36.3134	4.84819	414.414	118.809	17.2391	0.0757715	204.31	19.998	194.807	25.4041	2987.96	207.653	318.728	18.7749	1.48164	24.2263	157.57	94.3369	0.148604	10.8536	1.05046	3.87923	3.48946	50.7833	31.1914	0.069402	68.0297	0.146647	42.5141	0.975897	4.80861	42.474	13.4124	96.5353	21.142	73.4443	252.101	17.1088	72.6863
TCGA-ZF-A9RC	0.183788	0.0097729	40.0726	11.7752	0.0170686	42.9487	19.9682	4.25033	33.9208	60.03	17.2457	1.41155	245.501	86.7881	14.728	0.0461408	72.5367	14.0711	70.1165	7.07845	137.722	190.987	61.7984	14.2384	27.8163	20.8978	39.6262	22.7188	0.163965	11.4511	0.791503	3.47856	2.79683	89.6505	7.07324	0.0586366	41.9806	0.122001	17.1832	0.89532	25.0633	63.9241	9.74643	120.131	14.037	50.027	109.902	26.1395	93.2527
TCGA-ZF-A9R7	0.0467977	0.0231281	17.4082	1.28928	0.0100193	17.2061	0.726212	2.34663	10.4236	43.5404	19.6143	0.576624	171.128	105.385	5.73638	0.0913932	57.1563	17.6235	69.9064	4.20726	23.5744	73.0739	26.0187	16.4839	12.8347	23.3659	15.3421	23.6288	0.144981	5.05491	0.942591	0.794407	3.5794	153.507	5.60374	0.101132	17.7187	0.0844614	7.14388	3.04397	5.03606	24.3661	11.4058	41.3365	23.9227	39.697	26.7841	11.4405	36.2375
TCGA-BT-A20J	0.0762496	0.066248	6.08128	7.01669	0.0261218	47.3619	3.22192	2.70416	49.901	144.658	18.9423	1.2073	190.617	57.4631	13.7616	0.0953999	118.457	16.6971	52.1406	4.7634	98.3823	327.81	85.1156	18.1947	63.2698	22.7701	29.979	83.6429	0.501283	8.71837	0.792702	1.44123	3.78987	326.279	9.63419	0.100736	22.1892	0.333335	8.41077	1.64186	25.9212	53.752	8.58622	163.717	32.6211	89.9017	158.987	30.9032	152.922
TCGA-2F-A9KT	0.0729921	0.00547411	80.2565	6.85013	0.00682494	23.9061	84.4757	11.1302	98.7545	60.1829	19.5908	0.554967	291.957	78.1074	3.64658	0.0259373	110.315	14.7334	95.8967	4.09725	414.079	93.1576	147.022	15.6685	3.38481	23.409	14.6168	16.9467	0.068427	1.58694	0.926205	0.350643	1.77102	11.4598	5.78316	0.018306	33.9755	0.0546473	30.1941	1.22842	10.7087	28.8493	5.06763	125.127	14.8545	61.5104	93.7403	12.9006	66.6239
TCGA-FD-A3B5	0.125056	0.0424194	32.3418	67.293	0.026036	2.72883	50.9006	58.3541	371.024	90.6734	16.9639	3.4093	230.668	52.5004	0.560087	0.0285559	189.755	14.1216	120.554	20.9241	378.609	48.0188	518.846	14.8067	0.115257	25.1788	31.0959	116.85	3.75679	2.5909	1.04606	1.49468	2.52836	40.0727	9.59174	0.105596	56.0861	0.248613	31.3693	1.37776	15.2434	77.8356	9.67824	138.409	15.3956	57.1172	135.613	1.33209	86.3373
TCGA-FD-A6TC	0.0390865	0.0240388	45.3039	10.9319	0.0106665	26.8609	50.7511	9.12526	70.2777	39.4124	29.0678	1.45669	276.222	70.0664	5.99672	0.0494578	70.3818	12.1481	88.8654	6.68288	361.02	76.2571	104.864	14.7619	2.60032	22.8304	23.2627	23.4883	0.0917646	2.88405	0.897447	1.02488	3.36674	38.4682	11.2806	0.0254859	44.1402	0.0595528	26.2678	1.36093	4.78438	30.8505	5.0462	80.3313	23.6281	56.832	115.693	12.0378	89.7422
TCGA-FD-A5BY	0.0194234	0.125588	13.923	10.6276	0.0245643	47.0193	102.469	203.556	224.382	46.2635	59.1248	5.65112	394.724	120.442	4.70191	0.0250876	393.444	17.8604	264.174	87.0691	1084.47	151.849	223.423	28.66	1.53337	28.9685	58.3964	82.1422	0.118873	1.84027	1.11239	1.1667	6.75396	31.4359	4.25559	0.0656491	74.932	0.0699021	70.2141	2.15811	1.40509	17.7216	10.9068	223.002	39.0478	69.0213	657.616	10.1322	90.4404
TCGA-E7-A97P	0.00510568	0.00586295	5.41072	0.777319	0.00829388	57.614	75.112	101.23	143.04	19.5606	32.1138	0.646875	175.942	50.4176	5.15389	0.00839063	67.9594	11.8384	147.494	10.3767	234.988	40.0146	207.479	16.4117	0.12552	22.6985	57.6352	17.9842	0.0793162	3.72913	0.832757	0.170418	0.720923	1.98211	5.50221	0.0366855	16.8281	0.111579	50.2556	1.68041	0.411311	5.70144	11.6436	125.281	19.7199	63.6881	34.9888	15.3922	2.16607
TCGA-ZF-AA5P	0.42926	0.137766	166.907	14.3094	0.0213732	50.3837	5.79467	1.56321	2.07315	105.266	28.9657	1.89304	165.965	108.831	26.5255	0.0306907	48.6426	12.7334	73.2997	34.5272	67.423	88.1341	12.0222	22.4788	34.1912	19.9801	12.5012	46.3611	0.186544	3.5878	0.73888	2.24344	5.61892	236.839	5.91634	0.0547255	23.5868	0.0796467	11.6671	1.24238	126.735	143.889	7.5338	60.7889	28.3272	48.9957	37.3345	27.0503	61.9451
TCGA-FD-A43N	1.01258	0.00600275	3.01445	1.22697	0.00298679	2.67044	0.028472	0.199829	2.07391	141.707	15.1234	0.154206	159.682	71.1834	5.53066	0.0796954	20.7738	14.4177	50.7568	1.77188	0.685236	150.953	1.5836	12.5049	321.573	19.9332	24.7143	43.5368	0.621157	35.2468	0.766559	1.71501	9.1117	1742.66	0.328236	0.0338889	8.95314	0.276904	2.39547	1.74651	437.877	183.973	7.45491	27.9135	22.9645	36.5382	120.864	7.72837	157.187
TCGA-GD-A2C5	0.154622	0.137358	103.589	18.5561	0.0277546	44.2897	9.01183	7.20842	51.8057	134.98	23.9216	3.30545	171.72	75.2174	7.77088	0.137868	207.889	13.8437	57.9535	13.5851	155.202	114.997	42.1915	18.4568	15.3045	21.1528	26.079	84.2779	0.381486	8.59719	0.826507	4.1108	3.68848	386.637	17.9827	0.646118	38.9766	0.158139	13.9219	2.68759	30.9926	121.302	18.646	89.6173	22.6336	52.7717	117.709	17.4073	129.508
TCGA-GU-AATP	0.223556	0.149841	18.4943	15.3429	0.0367695	44.3997	0.328672	2.43531	26.1996	117.11	34.365	0.987661	226.268	94.2164	12.8523	0.0506363	109.59	14.9605	77.3124	14.9987	81.2445	272.436	34.3255	22.5968	146.666	23.7263	27.248	80.337	0.328205	8.04955	0.84296	3.51476	7.18472	395.933	1.68928	0.483826	25.6257	0.1949	22.3383	2.01322	27.2037	148.687	18.4669	181.831	27.0376	54.8325	44.8397	30.1166	98.2142
TCGA-DK-A6B2	0.205377	0.0669957	80.9894	23.22	0.0371163	43.8792	13.9536	16.6215	71.3635	61.6358	39.636	4.0963	208.086	76.8866	14.6833	0.097604	156.361	14.1776	71.7261	17.9214	258.837	432.484	66.834	21.5399	20.084	23.5238	27.6795	58.3461	0.172739	5.11615	0.888304	3.37326	5.00484	131.16	12.4248	0.137232	70.0839	0.0808306	30.1347	1.68822	20.4073	83.5948	7.58481	125.679	37.8334	68.4306	191.611	19.1319	109.06
TCGA-4Z-AA7Q	0.0137573	0.019882	1.57684	15.867	0.00587724	6.90077	9.34472	15.9401	79.426	55.3652	17.4044	1.94807	180.868	42.9262	0.304215	0.0521004	82.3152	14.8013	77.6594	18.2144	106.103	27.9192	160.746	10.765	0.330132	19.9143	16.4373	80.5573	5.14552	0.768873	0.757987	0.999126	14.7915	24.8592	142.515	0.0146605	49.5845	0.123794	2.5444	3.39195	1.05228	17.6856	5.78008	60.074	18.3092	21.9862	13.5786	3.60184	76.3683
TCGA-H4-A2HO	1.18684	0.0172513	6.27626	1.68373	0.00403799	1.04422	0.00444024	0.0802542	1.25296	145.029	12.6393	0.395104	124.8	60.1833	7.08114	0.614525	14.854	13.747	39.35	1.61534	0.00385378	148.416	1.0883	20.0746	1073.17	17.9943	21.9816	53.2976	1.79311	81.8525	0.76289	3.83892	19.137	10522	0.965322	0.0675229	12.3183	0.490499	0.708876	1.92524	867.903	104.804	6.9705	14.614	28.4424	28.1821	128.54	5.58642	452.188
TCGA-FD-A30	0.140548	0.0633824	44.422	4.54597	0.0176007	20.7327	3.02779	3.74981	31.8153	87.0135	34.0207	0.64578	235.635	95.7833	8.71488	0.124387	100.065	17.8134	100.588	4.19321	355.076	292.363	41.7735	24.3815	24.4874	23.0697	35.7566	57.8204	0.198026	8.06428	0.980945	3.16864	5.10043	162.91	4.73066	0.1483	47.2422	0.122893	14.8386	1.77684	19.8209	97.9517	10.5744	99.8578	29.3712	67.8211	79.5973	11.0423	204.397
TCGA-DK-A3IU	0.0657611	0.129559	44.3052	15.4328	0.0416832	78.5356	10.2372	27.792	90.4475	46.8162	29.9629	0.64866	138.119	44.1041	18.1333	0.0158029	86.0883	9.46682	72.2642	15.3958	505.629	235.791	75.8615	14.4193	2.43773	21.9298	13.2499	84.1861	0.187095	1.52067	0.653935	1.80279	1.7303	78.1472	3.17441	0.338692	31.6643	0.268387	63.7273	3.23193	7.61117	54.9903	3.54146	187.045	26.1914	49.7132	49.028	21.8656	33.9755
TCGA-K4-A54R	0.0290454	0.031459	14.1593	1.99041	0.012506	29.3757	10.4963	0.917697	40.3124	107.143	19.4631	0.802231	137.556	97.7146	9.22666	0.0689327	151.818	14.7214	77.631	3.25427	10.0327	85.3237	22.4459	22.6902	8.81004	20.4432	65.6652	86.8545	0.191872	12.2601	1.08554	0.493997	4.61945	414.513	18.1968	0.216852	9.20805	0.149101	8.51893	2.21399	10.7967	37.4828	8.85681	91.5314	28.0352	68.4191	104.39	18.8165	78.6744
TCGA-E5-A4TZ	0.0764954	0.0181516	106.454	17.156	0.0135099	4.12184	6.79005	10.4975	82.2272	37.5364	14.0568	1.30116	266.055	63.3644	0.494209	0.0710762	141.05	14.5369	82.6575	4.54946	1819.42	46.9628	303.722	7.31379	0.34966	22.3505	27.7168	130.486	0.80518	3.28345	1.05022	1.04306	3.90922	85.2545	104.1	0.0272715	30.9438	0.136578	11.2738	0.956581	5.87622	67.0284	9.20247	46.5485	9.68479	36.1175	150.005	1.8066	81.1176
TCGA-BT-A3PJ	0.0158172	0.00498994	6.72304	4.88574	0.00312375	9.99198	59.1086	67.1195	112.123	13.8194	25.4745	0.961943	208.769	35.2854	3.59124	0.00338112	53.3546	8.60859	177.085	4.14208	938.013	51.3768	134.637	8.48293	0.344738	16.4317	34.2255	51.0759	0.0949412	1.50872	0.827141	0.930634	0.819168	31.3906	3.12899	0.01997	36.8631	0.071445	42.6638	0.585068	0.805301	15.0668	2.85672	56.4654	11.9581	62.8031	74.7497	1.45052	30.4186
TCGA-XF-AAMQ	0.0206677	0.0431651	33.516	3.99102	0.0325599	132.536	413.39	176.508	216.543	34.9975	30.1806	3.05921	257.383	123.632	10.2054	0.0326978	226.612	17.4548	127.415	17.0854	905.609	167.026	160.054	22.6734	0.569812	26.4652	23.9937	44.9725	0.0924479	3.2232	1.05351	1.02797	2.83165	49.888	50.9093	0.103859	37.3277	0.114512	47.3765	1.84333	1.92419	13.9911	11.7628	127.554	24.5938	62.5525	244.166	39.5539	29.3872
TCGA-E7-A4IJ	0.158865	0.0181237	4.20758	4.61616	0.00950687	10.7692	0.4221	1.59046	16.8354	62.0053	26.1839	1.1287	222.117	78.1061	4.85213	0.123511	33.6035	14.3777	63.347	5.29241	30.1301	124.843	17.181	13.4973	94.9399	21.9525	12.1898	42.9911	0.207432	6.44803	0.754642	5.31933	6.14576	93.7268	3.67918	0.0379186	22.6466	0.0673558	6.35151	1.74534	27.1107	64.4031	21.493	46.9131	21.8732	30.9965	105.694	8.33536	97.4847
TCGA-FD-A3SR	0.0575234	0.186258	94.1543	48.9296	0.10445	61.7123	50.7259	166.07	116.747	28.5306	30.4558	14.3548	246.773	94.9551	18.8353	0.0732856	237.916	12.9229	73.8427	45.159	864.214	555.692	166.956	8.53187	16.197	23.4983	12.6082	200.197	0.233448	2.67054	0.817773	9.26053	4.07625	145.718	50.9005	0.194378	43.0165	0.0626256	73.8071	2.02538	3.63915	251.221	12.9522	176.581	19.4308	36.5496	115.031	24.2932	61.3471
TCGA-DK-A1A5	0.0421145	0.0291799	32.5744	10.6787	0.0355832	21.0457	85.3326	56.7504	138.237	32.8005	39.7923	3.07491	247.549	63.7458	2.73668	0.03679	145.184	12.4168	87.7282	15.7719	400.229	191.551	81.7433	17.7164	6.29748	22.8589	49.4483	26.7459	0.322887	10.2423	0.850328	3.54968	2.86184	44.9845	20.593	0.0937763	45.5986	0.061166	56.1864	1.23406	6.8423	59.9123	13.1539	110.239	24.3692	76.2381	194.484	10.6718	47.3437
TCGA-KQ-A41R	7.78106	0.0573276	78.1537	4.68184	0.00702534	4.58451	0.00250809	0.121758	1.30239	352.025	16.5948	0.150416	145.453	103.091	7.23546	0.582089	52.783	17.9761	48.7482	1.42432	2.55064	106.317	8.36463	24.2311	399.482	19.4852	15.3086	109.387	1.84053	26.2872	0.757335	2.99957	21.9841	8472.55	1.43754	0.520655	12.2604	0.497393	1.09622	1.64031	884.789	500.753	10.5681	60.226	28.9835	31.9469	42.9872	7.09528	543.295
TCGA-GV-A3QH	0.358437	0.0662356	90.66	15.1044	0.0325072	9.35289	0.134987	0.965649	34.9049	104.262	34.1347	0.76586	261.419	176.844	0.589357	0.279045	110.517	20.4462	67.9653	3.23413	104.064	88.5125	18.5503	21.5124	71.6997	25.6268	21.892	116.336	1.05723	6.0671	1.04207	11.0444	18.6197	853.444	7.30712	0.178891	31.3089	0.131559	4.93442	1.67872	94.5119	138	37.4868	72.3873	31.1869	44.291	54.6727	10.9817	180.172
TCGA-G2-A2EO	0.0181826	0.00869485	11.6842	3.92155	0.00718656	104.767	148.719	35.4615	36.2601	50.0779	21.5197	0.975686	234.504	72.1297	10.3339	0.00849856	135.302	12.1906	131.316	9.40521	429.234	154.99	101.005	34.2971	0.599246	20.6767	14.5105	6.73872	0.0290832	1.02423	0.70464	1.41561	2.04627	5.47164	2.35011	0.0252642	22.3567	0.024872	23.5012	0.761238	1.77377	5.82737	6.15482	125.17	15.4866	54.2266	172.075	30.2845	62.5675
TCGA-FD-A62P	0.15603	0.0192888	21.5866	29.2193	0.0127669	17.4565	15.4567	8.32184	64.0608	101.393	22.9323	2.11144	222.523	62.2162	4.12082	0.100522	80.1315	13.988	89.531	12.113	178.035	136.879	105.431	16.6465	5.97043	21.1214	46.3715	48.7723	0.610842	5.78923	0.784924	1.3379	5.00105	130.456	15.7007	0.0445619	38.7527	0.102429	13.2196	1.83473	28.5989	63.0539	7.7244	82.1493	24.9371	38.5341	171.36	8.71276	147.212
TCGA-E7-A6ME	0.0205931	0.0810213	22.5312	10.2037	0.164842	62.2881	3.34923	10.166	77.889	19.8414	30.1812	2.21595	295.548	167.555	11.658	0.213782	144.223	19.562	105.493	4.40099	827.265	153.883	105.133	21.7526	9.20459	24.0578	23.469	63.2828	0.151092	4.09532	0.825091	3.61259	3.21266	74.0907	72.1267	0.305542	30.0629	0.0831542	22.8313	2.1355	1.34245	19.0572	15.6093	116.292	17.0318	30.715	34.9594	34.2327	23.632
TCGA-BT-A20W	0.0527121	0.018053	21.7104	2.6803	0.00934562	55.9223	11.9524	2.8518	18.8335	33.5867	16.3973	1.78327	116.838	53.191	17.1854	0.0189679	44.4265	7.16185	61.0397	10.5544	23.0525	73.2423	20.2004	13.5696	1.48754	14.6336	13.1918	32.1446	0.0762646	3.17381	0.618144	1.78501	2.42785	102.509	4.84931	0.0764149	11.04	0.0669963	11.7063	0.7196	6.84583	27.7747	6.26088	59.5164	11.0516	47.9141	57.5507	31.077	32.2933
TCGA-DK-A3WX	0.0126376	0.0120217	4.46396	3.29013	0.0123695	8.14233	2.90202	3.81884	79.6834	27.5506	15.6008	1.23349	192.888	51.6729	2.89889	0.0192363	30.6323	11.0571	98.4251	11.6961	74.0069	57.4841	68.309	12.2387	2.63081	20.0429	41.8267	57.2938	0.352799	7.43267	0.895296	0.715431	2.49844	53.8048	7.18882	0.0794522	19.4029	0.114022	13.6287	1.44175	2.51184	31.8653	8.76119	42.2302	12.975	43.1863	50.9125	6.81976	24.9233
TCGA-BT-A20T	0.0813623	0.0113261	15.3987	2.0904	0.00580703	14.7656	2.82107	2.24611	40.1522	72.4948	19.5885	0.823032	186.245	85.6567	5.72279	0.067098	71.8148	16.6582	81.786	4.58274	30.0364	72.9529	31.4266	20.7898	7.52005	22.3613	26.6838	28.2547	0.235911	8.25727	0.830231	1.47271	3.90059	225.86	6.4742	0.0441852	20.0092	0.110296	8.039	2.22915	13.4982	60.2628	7.99568	54.9035	21.5882	50.1312	90.9535	10.4958	69.8739
TCGA-FD-A5BR	0.140057	0.0340408	43.4879	4.33684	0.0079407	18.0727	1.48077	1.02711	15.3783	95.7038	18.6108	1.14693	170.853	81.3097	6.42942	0.0784519	79.3755	13.9293	63.7121	5.18381	61.5535	97.8356	28.5437	19.2417	17.5281	19.5185	14.6817	46.341	0.219996	4.70801	0.842554	1.66595	4.09751	908.575	3.84833	0.0802355	22.6774	0.143733	6.97963	1.26987	24.7103	103.192	7.12322	68.8727	20.1372	42.3603	83.1108	14.2976	131.831
TCGA-FD-A3N5	0.0229971	0.00494552	6.53429	36.8358	0.00286571	0.102422	2.66283	13.8243	197.296	6.95014	10.6867	0.884626	214.222	23.8989	0.129825	0.00567071	33.1622	9.32856	150.277	4.46138	1275.5	23.8304	248.618	6.1037	0.00276726	20.8445	5.24209	73.9437	0.228821	1.32474	0.700943	2.09915	0.724921	76.583	6.97429	0.00447583	34.5417	0.0576519	24.8277	0.29504	1.37422	45.7145	6.38071	24.3909	5.65019	37.6511	79.1125	0.064421	14.1827
TCGA-MV-A51V	2.28647	0.587889	133.957	50.8112	0.0859982	38.897	0.467997	1.89173	28.8992	324.7	29.1097	4.5934	217.647	114.104	8.16391	0.809368	177.2	21.4979	64.6031	22.8981	68.8956	332.981	91.8327	27.267	238.492	22.5209	117.501	251.712	14.2941	86.1381	0.904993	5.68809	17.0199	1937.98	24.9561	22.4743	75.2211	0.584518	7.37904	3.59093	254.472	313.208	50.6936	119.897	41.213	42.049	75.1143	16.9284	453.883
TCGA-FD-A3SL	0.774904	0.0926219	120.006	30.3567	0.0147324	32.3419	0.136472	1.14658	4.75942	175.124	25.8245	2.02871	176.24	59.7943	10.7027	0.0333543	57.8604	10.5864	52.8771	8.9696	68.305	275.967	11.9259	16.0027	188.876	19.2215	6.31599	121.468	0.408583	3.91008	0.70364	5.49573	10.6411	782.01	1.6725	0.268774	57.7983	0.162265	17.4451	1.24708	155.543	769.422	7.9875	67.5681	22.8595	52.3122	87.6059	25.9713	256.628
TCGA-G2-A2EC	1.11452	0.0693646	72.1868	2.792	0.0099019	10.2567	0.280074	0.460864	7.5068	208.696	21.6758	0.51076	155.548	90.8305	6.58369	0.124461	33.1791	13.3015	60.467	3.468	4.42444	112.166	6.76394	21.7903	126.077	17.9288	10.8343	45.6016	0.305669	9.70636	0.826653	2.57765	8.60871	3359.78	0.715734	0.254379	32.6914	0.265516	3.4184	1.19892	196.791	236.714	6.10562	53.1201	22.5424	54.1988	94.6615	11.89	330.982
TCGA-4Z-AA86	0.00661073	0.00889858	4.42173	10.2763	0.00965881	16.9539	46.5398	186.685	103.454	14.2865	21.4919	1.56185	183.217	47.2532	3.18308	0.00786803	70.3366	9.80443	149.358	13.8755	392.629	75.0238	126.589	8.9277	0.68258	18.2619	27.6249	44.1582	0.143862	2.24012	0.76517	0.809574	0.510149	14.7944	3.50218	0.0320032	24.9417	0.0654813	43.7959	0.970934	0.401466	8.02376	7.20004	109.257	11.4868	45.8106	51.4609	5.28488	13.2987
TCGA-FD-A3B7	0.0320626	0.0208261	5.86404	4.26492	0.0152479	21.4415	26.8602	6.95761	46.477	31.2612	18.3278	0.639132	151.05	37.6183	5.76844	0.00808624	28.6528	8.77605	89.3142	9.66051	89.3941	101.265	35.2659	13.4896	1.9474	19.2567	16.5978	46.4255	0.137193	4.64322	0.733994	0.579577	1.3146	44.4676	1.34568	0.0704838	12.5206	0.145374	25.4239	1.30305	2.92554	30.7226	5.21025	78.0061	16.3644	60.3212	37.6173	10.334	16.4929
TCGA-DK-AA6M	0.031223	0.0304723	64.4641	28.6666	0.0349263	119.078	77.2335	690.312	286.955	77.8421	36.719	2.28559	239.675	73.5011	15.0789	0.0126881	266.23	13.4055	198.151	46.7716	1418.4	122.503	989.512	21.4094	0.187479	25.4561	63.9057	73.2905	0.157404	1.48302	0.726689	0.422766	1.17172	13.3262	5.29624	0.156505	47.6309	0.160771	108.392	2.06826	2.88108	25.9382	7.21408	273.97	20.314	44.8101	123.159	27.0684	29.9872
TCGA-4Z-AA83	0.12815	0.00801093	14.0643	1.6063	0.00373835	8.75369	1.14884	1.20855	15.0794	90.8734	15.834	0.389254	187.141	69.9601	3.52023	0.0493255	35.7023	13.4857	75.6027	4.4586	8.11853	74.3319	10.3108	16.9379	26.0431	19.3327	14.2957	23.3896	0.178213	4.98615	0.857135	0.652312	6.24474	172.59	0.7273	0.0476358	12.7461	0.110829	6.82173	1.75693	32.3419	32.0776	5.18448	52.5157	17.4942	36.7297	62.557	10.8336	97.8436
TCGA-DK-AA6X	0.300326	0.126145	22.1648	4.2002	0.0318341	11.0507	0.22287	1.5219	33.2901	169.266	19.1446	1.2946	169.1	82.3791	4.66641	0.822381	109.823	15.3074	58.5353	8.8671	37.5687	332.298	32.6728	16.6857	135.902	20.3379	53.7469	172.22	1.19063	24.0287	0.880754	7.37547	23.8399	4373.15	12.1398	0.583823	37.6943	0.140602	5.13665	1.93483	50.5674	253.348	29.1535	64.2017	19.1986	32.3	262.704	7.71202	238.643
TCGA-ZF-AA53	0.0458486	0.015369	10.7307	9.49422	0.00698389	27.5445	60.8187	47.4341	96.1819	34.0428	33.1343	0.673035	171.906	36.9571	5.69803	0.0117176	73.0999	8.99464	150.364	14.0696	259.331	85.7579	140.668	17.996	1.26374	22.5466	22.7571	41.3532	0.1792	2.33216	0.666646	1.30968	2.05738	16.4447	0.779666	0.0248168	45.9926	0.20416	65.5241	1.60193	3.33175	19.5186	6.6423	166.268	27.4648	35.392	66.6977	8.73753	35.7283
TCGA-DK-A2I4	0.0151728	0.22027	19.1176	4.68287	0.0917371	134.517	7.60482	177.452	140.377	23.9794	33.5654	2.14121	143.774	42.6755	35.9428	0.0244626	146.66	10.2748	76.3191	35.4859	325.407	286.432	104.992	14.6763	2.61515	19.7597	56.3011	117.427	0.229137	5.87968	0.767272	1.53521	2.58248	17.9548	12.3796	0.615433	41.8157	0.331359	53.9258	2.94727	1.23129	23.344	5.93737	402.231	26.9294	43.1285	105.119	40.1204	30.296
TCGA-HQ-A2OF	0.88693	3.35786	322.472	10.9265	3.21943	51.3672	3.90662	7.16779	252.528	477.69	15.588	6.21804	245.076	186.454	4.9132	0.971441	724.095	20.0861	96.5829	57.4004	656.718	1108.48	131.504	33.0322	68.6177	21.6438	17.2772	86.9204	1.00605	3.3682	1.58111	0.956629	19.8054	104.941	208.712	3.42839	26.9153	0.595726	76.6479	1.05993	239.121	35.1248	30.0309	207.308	8.77019	48.3623	326.934	28.3367	206.434
TCGA-XF-A8HE	0.00846288	0.00272993	0.70308	0.24214	0.00192449	2.71072	8.99853	4.72861	39.3822	35.2773	7.74875	0.211166	134.304	30.6431	0.794005	0.0204374	19.5459	9.60141	82.6968	2.36297	10.6106	30.802	49.2383	7.90917	0.0952716	17.1288	13.2823	24.4345	0.230612	2.4657	0.824581	0.213669	2.87425	9.33201	4.52354	0.005786	3.19758	0.0733306	5.48814	0.908941	1.96748	8.61263	5.71167	17.035	5.30844	28.2503	95.2112	2.35153	15.1669
TCGA-4Z-AA7N	0.0996456	0.0149452	30.7879	0.95764	0.00473953	19.4835	0.170569	0.377736	3.53952	61.3408	11.0933	0.225743	80.7365	47.0232	6.49472	0.0398276	59.423	10.104	36.9476	1.40205	5.51484	42.7383	4.75816	11.3501	6.81669	15.8656	5.60244	42.6027	0.231412	2.91165	0.649602	1.48071	3.55277	615.539	1.87322	0.0603746	6.51586	0.166371	2.23138	2.68732	15.4002	34.0793	6.57072	50.742	13.0255	22.4607	17.6837	13.1874	66.6738
TCGA-ZF-A9RF	0.0197054	0.0204855	9.17778	0.612384	0.0150981	123.637	251.357	24.5822	106.985	27.0345	23.5865	0.624739	195.187	99.5273	43.1461	0.0220009	115.639	14.6054	213.242	8.36767	354.331	130.918	71.97	31.0122	1.38942	20.4375	44.8214	29.2326	0.0723061	3.71882	0.63442	5.95466	1.79233	13.9824	1.62389	0.100076	15.0885	0.0932518	42.7385	0.900012	1.53712	10.724	4.03839	87.5734	11.2305	67.0433	57.5324	55.0755	17.8073
TCGA-K4-A5RJ	0.0319487	0.889428	17.2191	33.6579	0.385196	289.852	143.414	6430.22	239.354	79.2752	26.4446	6.43728	144.085	51.601	73.7498	0.0840921	343.721	11.2171	125.632	465.951	4013.06	1264.06	432.722	16.1979	1.99037	20.1182	33.6215	106.694	0.286605	4.96635	0.603953	4.55001	2.69902	2.29366	68.1133	0.742836	37.588	0.0801039	62.2603	5.08015	2.67494	6.89221	15.8865	173.942	20.8915	28.593	146.042	88.8474	30.5686
TCGA-4Z-AA7R	0.0718005	0.00433802	7.15468	1.81189	0.00525911	17.1598	0.722884	1.26309	16.6032	50.8466	15.2845	0.272211	215.09	92.4445	2.55861	0.0229076	36.7892	12.6727	75.6288	1.97248	19.8201	61.5018	20.7971	11.2278	11.5736	18.7854	11.0319	16.6672	0.110697	4.69907	0.77223	1.37219	3.40558	90.4943	4.36297	0.0225204	11.4557	0.10535	10.6813	0.36775	9.35763	19.4485	14.708	50.5514	7.49168	48.4982	42.2189	8.0005	18.0814
TCGA-G2-A2ES	0.0139599	0.00526937	5.04971	2.08977	0.00425772	5.63669	66.4905	17.6306	100.091	21.4292	8.93117	0.605369	122.558	25.7769	0.947821	0.0167357	45.5319	8.95213	123.319	3.12342	211.415	28.6377	269.165	11.493	0.0579997	18.1608	22.1673	16.5291	0.0612526	1.73499	0.87807	0.310527	1.11152	3.48632	6.25885	0.0119985	12.0222	0.0891813	15.5543	0.432547	1.08905	4.79263	6.45766	34.5461	7.28971	39.4902	50.1648	2.87838	6.45075
TCGA-UY-A8OB	0.0141278	0.0298319	22.4095	17.0102	0.00732053	31.0577	55.7294	39.6255	241.965	29.2361	59.3289	1.60442	321.69	76.2936	11.3637	0.0559826	102.632	17.3585	243.574	12.1678	1062.94	78.3137	239.838	24.0842	2.38064	25.6549	115.651	59.1878	0.310834	9.77431	0.825663	1.44065	0.932304	31.239	6.10017	0.0473538	56.2157	0.108324	58.9841	1.53282	1.24593	30.4744	8.83028	102.064	39.3268	69.9281	132.722	7.51739	52.787
TCGA-XF-A9T0	0.0803197	0.0158344	68.8949	7.06423	0.00661652	36.568	36.7007	5.65227	20.6397	37.8442	21.1563	1.38284	180.966	75.4539	9.35437	0.0398941	113.618	11.454	75.1597	3.34286	248.601	102.052	100.739	24.8204	2.25185	19.86	12.1453	10.8707	0.0446285	1.97295	0.702596	3.72662	1.79035	67.4566	8.60611	0.0120227	35.3451	0.0265373	10.5745	0.655503	8.42249	27.5776	8.09804	75.3489	25.1038	51.0215	40.3101	17.6685	62.6915
TCGA-GC-A3WC	0.138614	0.0272613	8.62796	3.16453	0.00478865	5.90673	0.953623	5.74139	25.2283	62.9437	27.2547	0.48867	114.352	53.4749	1.49619	0.0273859	38.4434	15.2051	94.5454	8.78637	70.7778	342.557	14.1372	15.7691	1.4768	22.3183	3.45619	24.5971	0.139888	0.724311	0.963773	1.65171	8.67199	33.3133	0.887187	0.0123376	13.9016	0.171166	17.2486	2.71346	26.6698	30.9439	1.45707	99.6316	20.1258	42.2822	727.524	3.47986	44.6627
TCGA-K4-A5RH	0.0135049	0.0451164	10.3684	4.14312	0.0335192	224.132	8.38528	91.4904	112.338	13.8752	26.5541	1.18011	162.413	52.6958	60.8616	0.00877311	92.3392	10.0988	93.911	8.57215	646.488	189.555	42.9318	14.3106	1.07743	20.575	39.9639	103.072	0.180018	9.33213	0.56319	5.50731	1.26851	55.403	15.8973	0.218765	28.447	0.12347	29.7362	4.39597	0.71395	18.1276	10.5338	170.167	17.7722	45.2416	37.1066	81.6901	6.4577
TCGA-DK-A2I1	0.185316	0.0334948	22.2916	7.62063	0.00828919	18.7609	5.12897	1.50121	17.7237	80.3672	20.7502	1.22641	158.247	57.4691	7.79568	0.0465959	64.2795	12.5036	62.4087	9.4889	48.5365	144.848	35.2581	19.8923	33.3548	19.1762	18.361	34.4279	0.218911	5.90046	0.712808	2.74224	4.99078	469.069	2.7832	0.0598142	29.8162	0.135469	11.3663	0.863662	29.3082	66.6104	6.57523	62.9335	23.6114	47.0751	116.697	11.5141	165.571
TCGA-ZF-A9R2	0.0623678	0.00606281	14.4622	0.85467	0.00579426	26.5344	7.21689	4.50396	34.5756	63.4994	29.0457	0.614279	270.842	112.847	3.73266	0.0520759	49.8509	16.5423	75.6254	2.10175	31.6275	58.2449	24.9438	22.2176	4.18621	24.903	14.7924	19.2536	0.0627521	3.97023	0.92473	0.465712	4.32416	41.8005	14.8959	0.0238234	13.6136	0.0590004	6.74161	1.40988	9.01257	18.0919	12.4299	52.7872	19.4895	59.8899	100.755	13.939	53.7526
TCGA-FD-A3SQ	0.25049	0.209965	280.447	37.8607	0.0845151	71.6336	18.5599	20.3509	49.2975	113.763	32.1114	5.38935	220.238	66.8075	16.3775	0.0660149	92.7344	11.494	76.6893	53.8043	156.075	285.034	46.3012	20.293	15.3668	20.4857	23.6377	52.6958	0.16763	4.08924	0.898178	2.54737	5.99496	230.206	9.70108	0.437756	60.0494	0.0749016	36.216	2.29948	27.2751	100.726	7.95989	146.297	31.1881	49.0326	128.284	38.6339	99.7109
TCGA-KQ-A41N	1.60842	0.0338674	19.3524	2.69109	0.00431825	5.78317	0.033038	0.210634	3.41713	184.067	17.7544	0.273622	191.492	99.7205	4.82241	0.244386	38.7959	17.453	56.0497	2.64275	1.93203	106.401	7.91265	24.2703	301.583	20.079	14.8823	51.7762	0.648579	18.9831	0.771865	2.85602	19.9031	2279.91	0.801971	0.129323	18.2159	0.283713	2.3054	1.80705	274.229	262.847	12.4736	42.6664	26.3455	33.5997	52.1201	6.57696	309.277
TCGA-DK-A3WY	0.00552661	0.00979129	12.5522	1.17966	0.00712549	116.676	42.226	14.0547	28.439	5.28945	6.66034	0.48293	61.1337	18.2011	11.1167	0.007419	64.0102	5.50313	44.8343	4.96206	61.7275	38.5107	107.411	6.06533	0.0596321	13.6105	2.13531	5.99648	0.0207093	0.355889	0.438654	2.52833	0.492628	16.6139	3.02095	0.0174302	17.0125	0.0179734	14.0392	2.65663	0.564757	1.20362	8.78362	45.3682	3.28768	12.2877	12.0365	24.6114	2.11443
TCGA-K4-A6MB	0.98781	0.0154977	41.4059	11.4745	0.0143393	10.0392	6.76287	2.3742	33.8751	84.5069	18.4901	1.07842	217.538	87.7034	7.2575	0.136598	222.504	15.5889	57.0447	3.92647	82.4101	282.778	30.2444	15.057	83.1342	21.7342	35.8031	54.1476	0.610609	18.3227	0.877241	4.22288	9.34092	243.381	23.4393	0.0645751	31.2501	0.0978228	7.83337	1.53178	170.406	234.306	11.0811	66.1184	20.3354	37.1603	345.544	8.76341	236.632
TCGA-DK-A3X1	8.82901	0.0110184	3.59921	0.550222	0.00265866	0.267652	0.00057781	0.0449303	0.448994	270.587	10.9411	0.054185	128.555	82.2791	2.45358	0.292276	11.1389	16.7613	47.4581	1.0612	0.00408227	104.268	0.350792	16.0606	1823.93	17.8757	15.1957	55.487	3.48045	82.1298	0.771786	2.18611	28.3277	16367.2	0.104323	0.120863	5.4177	0.564193	0.538969	1.26757	2421.21	450.146	7.5365	22.6073	14.578	29.0486	63.0526	2.16066	418.826
TCGA-GU-A764	0.0362478	0.0134706	11.7008	13.2613	0.0149244	26.6881	7.39478	6.40673	57.4829	91.6256	24.6512	0.821599	206.754	62.3688	5.50964	0.0288728	54.8521	11.5236	100.48	11.9758	104.801	71.8601	195.294	12.4635	5.54711	19.8108	27.7569	61.3491	0.183248	5.00662	0.703558	1.01232	1.72646	116.888	3.33246	0.0868122	22.2595	0.134169	25.9173	1.21163	3.77863	44.1547	12.5084	70.1851	17.9692	35.4421	46.7404	8.73646	36.2296
TCGA-4Z-AA7O	0.141527	0.015954	9.67657	2.17871	0.0065241	11.1997	7.04904	2.78587	32.32	58.842	17.1351	0.808308	197.168	73.5684	5.64997	0.0681884	68.2985	14.6745	66.9355	5.26223	28.5121	120.077	19.8462	17.2558	22.771	21.8324	27.718	31.7994	0.24073	14.2472	0.904801	1.39997	6.00512	430.194	6.37886	0.0737345	29.1106	0.13588	13.2827	1.19446	29.5417	82.8662	11.3714	47.1635	17.5037	54.6441	180.711	7.34681	83.0311
TCGA-FD-A5BS	0.0429805	0.513372	245.467	39.9943	0.137816	174.837	12.6884	159.519	77.11	32.6546	25.9974	5.01623	140.45	34.5428	27.1505	0.0522599	65.2158	8.02169	49.2484	153.773	200.078	154.802	255.64	12.9544	0.7483	18.435	20.6969	72.0212	0.100897	4.26304	0.794681	4.09951	0.781423	200.696	39.4769	1.37426	53.3464	0.168854	62.3615	1.31342	4.55407	18.5864	26.9361	121.14	17.3365	48.3068	53.7622	38.5754	11.4957
TCGA-FD-A6TF	0.0851349	0.0228835	38.0657	9.55449	0.00982606	35.2972	11.4972	3.0967	26.8919	86.1596	24.5576	0.977889	220.772	100.137	9.96468	0.0386376	93.9888	14.8292	122.249	9.85255	194.197	69.1841	138.784	19.7529	7.71717	21.5337	26.3544	36.2075	0.136962	2.81881	0.658377	1.34893	2.68906	96.8445	2.66229	0.0688231	17.4239	0.107928	22.9047	1.11313	12.7749	50.1437	8.58241	104.925	18.4605	46.8149	69.7207	16.7013	85.494
TCGA-XF-A9SZ	0.108858	0.0108074	36.5702	18.7839	0.0106202	59.3892	88.0183	36.6199	92.2525	61.6164	21.849	3.03869	237.232	49.0362	14.5797	0.0503996	163.809	12.1425	82.6104	22.2005	367.794	144.566	141.429	11.8567	3.76692	23.035	46.1472	31.7402	0.120136	4.14054	0.677205	5.15556	3.37653	26.7887	9.17174	0.0360128	35.6551	0.0739293	52.5333	2.02246	8.51664	39.0535	11.7334	151.037	21.1668	39.8251	134.162	23.0173	78.5247
TCGA-C4-A0F6	0.283389	0.0222456	17.0454	8.48103	0.00839123	5.95683	2.7046	1.38853	15.9228	112.197	20.4555	0.989347	209.003	78.6964	3.77028	0.150086	44.637	13.7923	66.5648	5.93154	28.8571	173.124	13.2678	17.724	67.5249	19.6156	17.7511	76.6642	0.211523	9.5336	0.815758	5.28542	6.50553	1154.06	3.49273	0.0996157	40.0746	0.0717014	6.5418	1.04918	93.586	94.8627	10.2754	26.2304	21.4129	60.3413	156.777	6.13733	236.102
TCGA-DK-A3IK	7.50163	0.02144	5.59595	1.46555	0.00366784	0.503049	0.000868332	0.060474	0.346804	238.136	9.59322	0.107014	142.19	77.0349	4.07244	0.524177	15.1103	17.0707	35.9512	1.30764	0.0115481	163.659	0.280027	14.8512	2924.99	19.2473	16.765	100.132	4.03726	107.057	0.744265	3.86096	34.8169	21933.9	0.390723	0.15386	10.7268	0.377846	0.661541	1.85049	2884.96	457.957	8.23229	18.6554	19.8496	31.1593	78.374	4.08841	491.966
TCGA-XF-AAMY	0.140863	0.0120821	63.9334	1.47701	0.00884745	16.6005	1.97265	2.02884	11.0223	53.7203	22.7801	0.480509	180.992	78.4341	5.70392	0.0624702	59.4049	12.2901	52.3715	2.33992	29.3965	175.081	15.7367	14.4057	21.2567	20.7353	20.0416	25.558	0.12178	6.12575	0.892222	1.13452	5.0184	182.992	8.60519	0.0435317	19.5429	0.0530444	7.72501	1.26487	24.6802	51.6422	7.97668	39.4974	22.2088	50.0273	86.0101	11.0279	76.884
TCGA-E7-A541	0.516374	0.0278159	31.439	7.99297	0.00746864	7.78066	0.372404	1.15954	28.1059	100.369	11.4252	0.543664	197.116	54.8303	6.00245	0.200451	47.5729	13.5364	70.6748	4.88557	69.2002	135.26	30.9971	9.47977	82.5985	18.6462	23.8913	106.891	0.721005	17.7215	0.764112	3.86291	6.46055	722.712	4.7167	0.112299	21.1107	0.134908	8.63101	1.41817	103.948	147.005	10.9361	30.305	11.2205	22.1683	266.466	6.82479	209.334
TCGA-GC-A3RD	0.64453	0.0251816	14.6525	6.60724	0.00758361	3.88731	0.829696	0.865381	13.3577	84.1757	17.9866	0.724806	199.785	79.7452	3.36436	0.15221	31.8455	15.8504	69.2388	3.33283	80.9809	110.5	6.96224	16.6717	74.1992	20.1116	16.5704	55.8153	0.530901	14.3358	0.801789	2.54155	5.34321	357.27	3.20698	0.0515699	31.6333	0.0866657	4.28392	1.33988	142.005	149.691	8.2598	27.5353	18.579	40.2781	153.826	4.78646	275.203
TCGA-S5-AA26	0.737323	0.0136328	20.7015	2.36673	0.00388362	7.94814	0.531112	0.640598	3.9826	93.3587	9.07763	0.350174	166.704	81.7636	5.63033	0.0767792	38.7121	14.4574	72.439	2.66631	8.53479	86.4883	7.0852	13.6112	41.4798	17.6914	9.18833	24.7156	0.167746	6.82381	0.797465	1.5502	7.77724	606.154	1.53902	0.0338575	10.3389	0.114217	2.80396	0.615397	106.074	69.0218	6.85066	29.5315	10.2525	37.3297	76.179	10.0783	127.495
TCGA-DK-A3IT	0.357489	0.0503235	49.6587	16.1873	0.0267369	20.3793	7.76945	4.54306	36.9632	78.6976	17.0381	2.02693	224.676	68.4247	9.87701	0.303405	114.332	13.1532	76.5635	13.1468	96.3892	350.786	42.1629	14.8809	76.2549	18.4323	58.7697	57.6584	0.464662	23.6309	0.859488	4.13633	9.3808	541.288	17.7558	0.304731	59.9025	0.0766357	13.8594	1.03164	47.8997	132.588	18.0458	44.369	22.5125	41.8878	224.825	10.6467	185.683
TCGA-GV-A3JV	0.371378	0.0652065	46.4975	20.479	0.0620801	50.81	15.0843	11.0806	49.4355	54.7554	23.4335	3.16691	215.036	83.0976	20.1236	0.129866	97.4992	13.8788	64.3712	8.68649	42.8069	335.595	79.0982	23.7215	31.0296	22.5851	41.1766	24.0318	0.144828	19.9621	0.828657	4.02472	3.58277	200.158	25.3469	0.204708	54.6213	0.166457	13.1302	1.36987	41.0729	35.9774	12.3494	63.9676	30.1735	74.0125	100.532	24.0889	84.8042
TCGA-E7-A3X6	0.0433941	0.0460454	32.6167	8.45121	0.0334738	51.5987	121.11	130.127	226.242	74.1228	28.7019	2.29827	233.365	64.3644	5.90274	0.0569379	95.4061	14.4915	105.819	29.3276	677.083	147.734	191.858	14.3984	2.98218	25.3699	59.5451	49.3802	0.575644	9.62945	0.951017	0.981582	4.30893	84.5945	31.0614	0.234218	47.5739	0.195672	65.4531	2.56203	2.69765	67.7372	19.5376	142.761	24.8975	50.0682	180.179	16.6366	48.2018
TCGA-UY-A78K	0.0721998	0.0310735	83.34	20.0643	0.0403618	65.1824	2.5569	5.25095	33.7311	84.7048	25.2664	1.08817	222.893	84.7633	7.61172	0.091338	195.696	16.0585	75.0676	5.83728	606.665	159.024	138.843	16.0231	16.0074	20.6877	18.7686	75.2354	0.22257	4.75439	0.782278	3.48313	3.43795	154.556	37.4458	0.171738	37.7693	0.155114	18.5912	1.63982	11.1163	48.4904	17.7744	69.6012	22.3243	40.5916	78.9259	20.4847	84.5284
TCGA-FD-A3SO	0.0294522	0.0360748	13.2737	22.4267	0.0099383	5.06188	144.261	47.3549	117.512	38.3352	17.4832	2.92278	205.76	54.5783	1.19616	0.0199926	125.007	12.7685	121.722	17.1471	244.923	65.9882	179.111	11.9481	0.103403	21.0042	37.7021	67.3368	0.879892	1.72359	0.945952	1.29046	3.47696	31.4951	27.6788	0.0254121	31.5632	0.157384	20.6453	1.80475	2.1322	13.0145	3.02187	58.2646	15.1812	59.8923	89.8686	2.44601	41.9486
TCGA-FT-A61P	0.0311168	0.223367	15.1944	4.93507	0.0455746	86.589	16.8123	22.7092	179.267	53.3519	43.0033	1.19246	237.4	94.5283	32.1117	0.0388889	118.337	15.5766	150.45	20.8753	225.194	372.388	112.224	21.5267	19.7777	23.2796	146.754	91.6995	0.311538	9.98844	0.869207	1.11553	4.14995	38.8136	7.83039	0.443764	24.2185	0.47684	64.1814	2.23781	3.50995	50.505	7.03396	335.467	28.9853	77.7421	199.267	29.4239	63.7613
TCGA-XF-A9SV	0.187102	0.0306669	39.3613	9.68031	0.0194336	20.7054	6.8439	3.15372	24.0628	66.6533	27.2506	3.23544	217.216	69.3826	6.94727	0.141809	112.79	11.48	48.4777	9.90522	32.0174	171.051	56.5382	18.3345	45.8267	22.2655	29.5852	52.3174	0.252414	11.7082	0.790872	5.25246	6.15531	267.296	9.96931	0.129104	57.2383	0.0965895	12.3478	1.02915	35.1107	127.688	13.4363	43.0612	36.1524	56.1532	200.987	11.7885	152.086
TCGA-DK-A3IS	0.0863523	0.033038	71.6204	7.11332	0.0107011	50.949	123.953	68.2558	99.7814	67.051	26.5497	2.143	325.471	92.4048	8.64433	0.0525377	153.941	15.3558	85.7637	9.11214	658.799	113.342	65.7412	18.8838	2.15479	24.3358	35.3347	25.496	0.0740821	5.26277	0.997676	1.73768	2.9489	31.2272	17.0498	0.130746	40.3169	0.0535473	31.3681	1.73608	7.60373	56.0093	20.7867	60.047	25.5811	61.3638	339.454	12.0465	99.3604
TCGA-DK-A1A6	0.0444773	0.0893197	27.7962	19.1302	0.029886	29.7342	3.57001	6.37233	40.1871	50.8442	54.8751	1.72612	335.916	141.795	6.35544	0.0722133	439.939	18.1955	95.0112	5.30992	648.123	619.031	36.9366	34.395	28.5552	27.6651	43.3978	33.6984	0.116052	4.26838	1.11351	5.01619	7.50728	29.9097	25.426	0.102017	120.167	0.0866404	12.3922	1.83963	3.34698	15.0819	22.4141	99.2391	46.4285	99.8894	182.525	9.00052	221.47
TCGA-FD-A3B4	0.00630632	0.0224201	9.2663	6.13553	0.00494222	13.1739	52.2258	140.907	225.565	15.5226	25.2646	0.820528	180.262	45.6342	1.81434	0.00629323	69.7765	10.1739	166.719	14.0771	466.205	40.3077	226.367	13.4463	0.0179139	21.7226	18.7479	56.0656	0.213504	1.80789	0.956796	0.654308	0.430084	11.5891	1.82611	0.0181619	20.1858	0.0592337	66.291	1.02283	0.442505	11.2256	4.95799	61.4046	14.3196	60.2927	70.2664	3.35297	7.73561
TCGA-GU-A766	0.00649301	0.0327517	3.40185	4.80338	0.0189403	35.6395	11.7472	46.7192	101.238	15.6201	37.6503	1.23845	165.38	68.1287	8.96437	0.0137036	54.4974	16.6706	219.844	15.5058	246.869	50.6522	196.338	26.1591	0.0922188	26.6868	51.8009	36.5206	0.184819	2.38314	0.807243	0.503047	0.602648	4.37195	2.85248	0.125493	20.9616	0.0874543	27.8807	4.44509	0.525074	5.05876	8.98005	108.292	27.7177	48.1818	16.1817	14.749	6.01371
TCGA-DK-AA6U	0.11224	0.0351086	67.8376	10.1256	0.0320415	29.1586	1.03458	3.07373	33.842	88.725	28.1057	0.912379	343.073	195.53	4.96796	0.135934	132.736	20.0259	88.97	5.37729	436.721	161.65	80.2982	19.9865	26.307	24.4537	13.0543	54.0913	0.217071	3.38426	0.957615	2.97151	5.99992	108.875	14.9373	0.147331	28.7886	0.102	8.67276	1.66389	13.0387	50.5465	17.1886	83.8172	19.3755	44.7217	45.3966	18.5533	100.736
TCGA-2F-A9KO	0.0214365	0.0314198	11.7899	1.44581	0.00748096	17.8442	3.87908	5.5732	44.4316	52.1634	22.3529	0.823515	154.751	73.5025	5.63135	0.0890226	78.5171	13.6516	65.0769	3.64082	62.6258	100.572	32.3881	15.7445	8.29282	22.6148	16.6272	26.5664	0.120336	3.04797	0.893287	2.03039	2.92565	75.1069	12.3327	0.0438385	17.9433	0.0689182	14.1582	1.67932	3.2237	17.3619	11.634	63.1323	21.0138	54.6864	117.329	9.7165	42.6093
TCGA-FJ-A3Z7	161541	0.286138	677.21	0.279613	0.00137011	0.237186	1.86433e-12	0.00472992	0	2569.68	12.207	0.00314433	87.2018	286.212	5.45497	4.70765	50.1717	30.1282	44.8347	0.139785	0	33.3258	0.00360372	35.5386	4372.07	15.5658	6.07832	714.667	11374.6	77.387	0.784215	2.76447	1094.04	1.63728e+06	0.00749989	9.09772	1.42794	6.68865	0.0077651	2.0905	66966.1	5407.74	4.7858	120.407	24.4148	28.2499	2.35652	2.9357	4011.13
TCGA-XF-A8HF	0.778386	0.0588605	61.108	20.9601	0.0191178	32.0803	2.9333	2.29351	15.5223	185.394	32.0075	1.47563	217.352	83.8139	11.6611	0.0844637	112.387	14.1611	77.7987	12.3932	140.354	152.906	66.2186	26.8644	48.9072	20.881	20.7028	68.8382	0.292063	5.62484	0.783111	4.02962	4.49881	505.364	2.4901	0.254381	66.5465	0.188524	10.2247	0.963556	71.2874	178.037	14.0433	105.005	25.7728	59.6977	80.4617	15.485	259.381
TCGA-UY-A9PD	0.0921432	0.0061407	6.50709	1.81634	0.00660272	25.2906	14.8322	2.04322	18.7256	45.6094	18.4199	1.21938	188.616	76.3777	9.2497	0.0493108	69.8021	12.7462	64.3875	3.46454	38.1167	145.124	18.2699	16.4376	17.7652	21.0774	21.8387	24.3709	0.101804	5.14649	0.728336	5.76132	3.03128	89.9393	6.35634	0.0138826	22.2817	0.0405051	6.56333	0.580501	19.1446	53.8381	9.75252	47.5997	19.4588	41.5625	83.0994	16.0399	91.644
TCGA-DK-A1A3	0.875811	0.0818129	206.707	72.0659	0.0237492	63.4508	3.87916	3.6363	52.7619	176.895	41.0401	4.91923	213.637	82.4725	8.86227	0.0609557	160.563	15.3531	76.573	27.355	343.52	529.383	88.4526	29.4997	64.9026	20.4738	13.7482	129.106	0.542282	2.27835	0.752936	5.90432	8.85281	535.265	6.44405	0.260782	70.5257	0.264707	26.5293	1.87106	101.196	380.637	8.54326	302.709	42.8367	49.1638	78.31	29.3615	397.577
TCGA-XF-AAMW	0.0284954	0.0130769	8.31674	1.64254	0.0129731	36.7046	33.539	14.2373	158.019	49.4817	26.9226	0.531228	184.164	55.8113	9.38922	0.0106548	48.3696	11.8006	163.424	8.87187	155.444	128.408	139.558	20.6399	2.60966	20.3999	37.2598	29.1913	0.169925	5.90658	0.855455	0.0283092	1.4834	49.6866	2.86766	0.0647687	31.6351	0.163049	38.1328	0.937705	5.01287	46.6722	7.91076	236.074	16.2748	74.3456	151.989	17.2206	36.817
TCGA-FD-A6TG	1.58899	0.0263503	81.9734	19.2825	0.00752643	20.5188	1.11747	0.758639	19.8442	201.207	20.533	1.34748	183.735	84.4706	6.40285	0.0755631	84.7383	14.9845	76.998	12.8942	37.3943	176.425	12.8679	19.7939	69.0672	19.6167	11.267	34.9505	0.617276	3.19831	0.823279	2.07894	22.3739	719.964	1.975	0.0845711	29.9201	0.312913	6.79479	1.92696	217.158	174.333	2.61088	120.632	23.9267	33.6511	133.848	18.3731	396.617
TCGA-DK-A2HX	1.15869	2.94509	1250.46	146.672	0.36614	172.77	161.011	172.758	197.175	191.172	39.1968	22.2195	227.687	71.869	41.3825	0.0992059	260.328	12.4754	83.3811	333.093	340.19	1466.62	472.958	19.2412	28.7001	23.2013	54.2621	221.668	0.579395	8.96821	0.775962	5.45453	16.981	363.422	58.6454	6.04038	70.6449	0.390784	126.689	3.08613	116.164	241.176	9.87506	345.495	36.3296	60.1335	282.145	52.1286	263.478
TCGA-FD-A5BU	0.0141275	0.0123027	3.78558	14.3929	0.00354276	7.16778	70.8225	93.5904	93.2538	28.2784	30.4482	0.917472	212.848	47.6992	0.671275	0.00475865	69.105	12.4036	146.999	15.1033	79.6132	41.533	83.7685	15.5506	0.0388378	24.3053	7.76711	26.8289	0.225331	0.432622	0.949569	0.513992	2.20177	2.84175	3.25715	0.00484676	38.0357	0.0621425	19.7703	2.4675	1.42571	13.3591	1.61692	92.5995	24.1267	52.7676	68.9884	2.26119	17.2165
TCGA-FD-A6TE	0.0481321	0.569752	50.05	20.5785	0.0912384	41.8846	12.2985	51.9354	64.164	80.3239	31.4482	3.73261	311.248	86.2661	15.5018	0.207269	383.963	15.4543	83.7829	18.2669	693.077	568.392	139.882	13.5721	31.5743	21.4905	72.7397	168.988	0.549475	14.305	0.93717	9.42758	6.17873	68.1985	29.4313	0.789421	67.9689	0.0997834	23.8867	1.23819	5.69178	66.881	27.8795	106.501	20.4059	55.3716	158.047	8.99242	90.8558
TCGA-CF-A7I0	0.796133	0.00595367	6.98974	0.804759	0.00232171	1.74036	0.0534659	0.126601	0.994737	144.917	10.4842	0.21523	137.935	72.6024	4.31605	0.248348	17.0463	15.266	46.3738	1.23746	0.022024	77.385	0.801216	18.2526	218.669	18.5672	9.14149	17.6437	0.324863	22.2439	0.704193	1.72855	13.2472	2060.36	0.767046	0.0302273	8.17906	0.14482	0.843047	1.41862	392.051	93.7441	4.98014	19.3516	17.2637	34.9163	94.7793	6.70548	222.418
TCGA-G2-A2EL	0.00917442	0.00822506	3.20556	0.0785729	0.00909772	86.6466	0.106413	0.96817	15.0019	2.27225	4.82491	0.597262	240.817	124.483	12.2545	0.10659	70.1427	11.7384	67.4367	0.496778	256.29	58.2426	32.6176	12.8243	0.498297	14.3407	29.1645	89.8164	0.310049	28.8142	0.822564	9.42168	1.86849	487.34	90.1581	0.0401247	12.5398	0.205207	2.77216	0.0597327	0.376933	4.10821	21.5951	12.0814	1.67844	50.5641	25.6739	23.403	5.81161
TCGA-BT-A20X	0.0298257	0.0191082	11.3234	7.50749	0.0133176	16.9737	72.2374	42.3813	182.913	71.6835	17.4263	0.732134	189.501	58.5009	2.0272	0.013363	180.404	11.8732	146.365	10.9039	234.742	50.7208	516.732	18.9217	0.0436426	21.6837	19.4438	82.8886	0.474087	2.00284	0.952958	0.26459	1.15101	26.0026	6.92308	0.0424078	19.1951	0.154421	29.0834	0.608971	4.79494	32.0194	11.1889	117.653	10.4831	84.7842	63.1447	6.01744	18.6175
TCGA-DK-AA6P	0.272186	0.0103192	39.2585	0.636462	0.010974	10.003	1.67453	1.25226	10.6515	58.2933	13.772	0.362564	141.909	90.9987	3.19551	0.101594	42.7248	14.217	61.812	1.78408	43.6669	127.529	13.4059	18.6295	15.6334	19.2254	8.40133	24.5645	0.209415	5.5252	0.801441	2.88708	5.6217	263.05	19.185	0.0424564	10.4666	0.103169	2.97988	0.664573	53.419	23.2939	7.5015	31.4487	13.8124	30.3048	108.827	10.8483	80.9877
TCGA-BT-A2LD	2.00311	2.01018	185.359	139.565	0.605626	60.7632	4.0566	6.64185	185.157	224.751	65.7809	1.27957	331.736	152.346	32.9809	0.23576	280.627	16.1946	111.683	22.7954	473.917	6989.71	179.948	29.5503	169.53	24.5127	52.0233	310.357	0.704292	7.27738	0.858862	9.86726	7.06526	817.437	6.41255	11.8447	125.633	0.264494	59.5214	2.05881	192.874	610.155	12.4652	278.374	58.4711	76.8884	160.107	18.594	386.067
TCGA-E5-A4U1	0.0805101	0.0069806	70.8589	3.79331	0.00672365	32.2987	4.5206	6.0428	5.35986	38.1123	10.518	0.615953	232.704	136.837	4.12971	0.0558304	103.979	16.8346	77.7595	2.99329	114.017	89.9443	93.4902	21.2947	2.38428	20.2148	5.26725	5.88093	0.0320934	1.5685	0.764756	1.39389	2.47873	28.097	7.41029	0.017738	22.5467	0.0126663	3.85422	0.928581	9.32932	14.8139	10.4675	21.234	9.41381	31.4005	23.4182	24.3087	41.924
TCGA-XF-A8HD	0.0867755	0.644823	103.935	17.1598	0.0279505	65.9884	2.29169	33.1641	133.356	76.9682	47.9321	1.71801	219.008	74.2121	22.9603	0.114597	313.277	15.9125	122.552	15.824	683.585	319.855	301.107	20.4267	28.0507	23.4293	131.526	138.876	0.323871	8.59783	0.902373	1.9081	3.37127	88.8433	6.67646	0.750598	74.1282	0.384587	69.4718	2.71993	9.6258	131.199	19.1962	283.006	30.32	65.2204	49.6854	19.0803	119.636
TCGA-G2-A2EK	14.3768	0.0261899	6.73618	1.21711	0.00543696	0.752727	0.00152632	0.0718193	0.454559	302.894	9.33177	0.252584	125.249	72.7595	3.48978	1.03814	17.6108	16.4497	34.3816	1.72077	0.00886725	173.146	0.223169	14.796	2870.13	18.6317	17.9288	87.4619	6.02805	105.261	0.76265	4.22022	59.573	30300.7	1.23585	0.224577	14.4437	0.44815	0.491576	2.09746	6942.27	444.433	6.5905	14.6012	19.7844	29.8603	113.086	5.32961	550.855
TCGA-2F-A9KR	0.0339576	0.00605472	27.2758	1.93085	0.00652925	20.1645	42.678	22.8099	71.956	52.6811	17.5309	0.618956	207.082	79.5813	1.96306	0.0583877	72.738	12.9624	67.1251	3.29225	182.644	46.996	103.006	13.4355	0.664217	22.0883	12.4268	15.8901	0.110928	2.14625	0.861053	0.551069	3.15203	14.8131	39.4445	0.0141945	16.5036	0.0439122	12.6475	1.78288	2.8927	16.6131	15.9292	52.8671	15.3818	31.5584	48.4023	11.4424	22.6022
TCGA-BT-A20U	0.0743188	0.00352259	17.9678	2.29416	0.00203698	5.33823	46.2348	8.56163	54.153	87.2833	22.4397	0.780583	164.205	50.914	0.686743	0.0105296	34.5081	11.6127	140	6.24768	128.735	97.2168	30.5328	15.735	0.258757	19.9244	5.0375	7.50421	0.0479852	0.366245	1.0065	1.04309	6.55963	13.9189	0.315373	0.00506489	11.8339	0.122313	26.1137	1.13931	13.814	16.7029	0.880193	84.0875	13.52	46.6521	691.746	3.22119	50.6172
TCGA-GD-A3OP	0.490756	0.0896679	228.377	14.8873	0.023069	23.198	0.479032	1.55944	12.4386	165.23	28.2221	3.51248	181.612	115.198	6.82853	0.473341	163.663	16.8308	52.1887	6.66809	29.8897	241.024	18.39	22.4038	65.4206	21.3063	26.0838	135.752	0.998498	17.2792	0.912414	5.63197	11.2482	1829.84	30.9854	0.612807	57.5123	0.191538	5.64426	2.34909	117.779	310.293	15.8133	42.2349	38.1724	48.7382	81.3895	19.0814	312.677
TCGA-CF-A47V	0.507303	0.0191504	18.8055	1.89678	0.00555079	5.33582	0.0246518	0.341783	2.632	114.536	11.8038	0.262405	159.431	89.3898	6.75086	0.263723	19.1306	17.7998	60.2786	1.92848	0.752656	89.8382	4.85316	18.8112	112.74	20.1201	15.4125	31.2375	0.600044	22.6428	0.844687	1.13111	12.4635	1382.12	1.98674	0.137662	14.1278	0.193588	1.98	2.53344	115.041	131.986	8.72794	29.071	15.6272	31.4347	37.1226	9.04413	140.49
TCGA-ZF-AA56	0.0210761	0.0271754	16.5135	6.21821	0.00983738	21.1978	98.8301	69.6946	198.673	76.6723	35.5956	1.67149	193.639	51.1043	1.81171	0.0130808	154.221	11.7028	139.426	32.6319	509.334	199.931	100.737	18.6063	0.332836	22.4551	12.7524	33.035	0.130188	0.554695	1.04198	0.929536	6.04755	10.7646	1.30514	0.0359238	25.1437	0.120053	59.5556	2.01463	2.58059	26.6482	2.70038	267.647	24.0125	48.6448	765.527	7.60735	50.1382
TCGA-FD-A6TD	0.0160406	0.0152411	5.69488	3.13947	0.0106212	31.1771	22.2304	26.2713	113.43	38.7917	29.7203	1.01286	203.108	65.008	5.79416	0.0144099	79.019	13.1565	147.732	19.0097	233.698	103.246	202.651	20.2451	1.06456	23.3007	35.5625	40.7701	0.108607	2.45497	0.753274	0.736151	1.39998	13.2273	0.784044	0.0617547	18.0948	0.116053	42.4039	1.6974	1.90275	14.9734	9.71192	120.29	20.0059	43.8686	120.678	12.4232	21.6509
TCGA-K4-A6FZ	0.010537	0.0165583	7.08816	5.00197	0.0105893	14.4617	42.5947	36.1101	124.875	32.763	23.9683	1.67496	183.275	52.9058	1.24971	0.0272134	94.986	14.2501	127.034	12.2691	181.806	61.5201	166.754	16.4813	0.168253	22.8712	36.8045	54.6366	0.172213	2.3657	0.96646	0.462712	2.13526	12.2999	12.3316	0.0486284	24.7754	0.0862716	24.4256	2.27093	1.29277	11.7027	8.53233	63.8939	21.2818	51.2618	85.233	4.30325	23.1674
TCGA-XF-A8HH	2.54211	0.0211689	52.0648	3.55224	0.00605018	3.26918	0.0461125	0.164926	1.45035	261.541	14.9425	0.329829	141.696	80.3444	5.58297	0.30574	59.8918	15.073	43.1673	1.90503	7.72971	144.021	2.4201	17.6418	388.214	18.9066	17.5833	60.6569	1.10086	20.6193	0.755612	3.21055	18.4086	4871.31	1.3752	0.12996	17.8268	0.223018	1.98772	1.39129	740.302	404.258	5.67711	33.5651	25.0334	37.7986	57.9036	8.34738	527.479
TCGA-FT-A3EE	0.109632	0.00372587	4.17735	0.457096	0.00224679	4.21369	3.07735	0.674641	18.3561	80.8255	15.9849	0.206527	152.111	65.4077	3.84555	0.0351387	46.1405	12.1975	94.4083	1.59685	1.16917	88.2696	25.9005	18.6035	43.2354	17.1119	24.6535	13.7361	0.052248	4.34856	0.650794	0.241003	3.00534	66.2507	1.20035	0.0126151	10.929	0.0472158	5.12613	0.600488	36.1995	24.9603	3.78543	80.4546	15.3416	63.1167	95.4544	5.35313	93.7909
TCGA-C4-A0F0	0.0022875	0.00257179	2.0506	1.53263	0.00281806	66.7782	471.419	52.8874	172.435	36.4575	31.1436	0.476055	218.384	82.3687	3.94074	0.00456213	63.633	11.1647	358.482	7.98906	1423.03	76.3876	525.156	37.5252	0.0562507	19.0435	45.7794	9.8642	0.0342727	1.11383	0.732563	0.114604	0.419072	0.838442	0.0864597	0.00548485	28.9587	0.0568494	54.2098	0.0894989	0.195973	2.27314	5.48555	120.337	11.9107	127.282	41.9203	13.4304	4.84063
TCGA-CU-A0YR	0.400833	0.131678	594.437	17.3784	0.0214086	111.019	21.0131	1.8424	4.91657	92.933	21.7065	3.74185	124.601	94.0805	30.0764	0.0288684	94.083	7.91927	60.2119	38.8976	41.229	89.1569	18.8127	23.0469	7.45934	15.0625	5.68894	52.7548	0.119056	1.75519	0.625008	6.62115	4.87132	656.602	4.13088	0.125507	23.2358	0.115363	16.856	0.79914	86.9625	171.452	5.06296	68.9185	19.5232	58.2115	25.3264	57.6236	77.3312
TCGA-GC-A4ZW	0.027139	0.0501912	69.9809	5.52081	0.0144551	71.1679	19.7583	29.8928	128.358	36.0553	18.4905	2.79682	355.876	103.408	5.1137	0.0766227	92.6375	12.825	84.8224	7.00699	2069.15	132.911	86.9901	12.8684	1.98333	20.9676	4.44902	40.7432	0.0687516	1.46893	0.805711	4.27627	3.48952	40.7225	48.1331	0.03678	52.3042	0.0883672	19.9955	1.00865	2.74632	9.76825	15.2477	54.1996	9.34837	23.5899	229.155	35.1827	31.3483
TCGA-FD-A6TA	0.139845	0.0200936	38.4708	5.47985	0.0207204	31.2163	16.6223	6.79905	53.2119	80.2001	27.4734	2.57039	179.389	69.3782	5.9726	0.0833567	86.1343	13.0122	62.9604	13.569	111.416	150.428	55.3369	16.6537	8.16005	20.9705	24.786	31.1565	0.282094	7.71023	0.843536	2.07871	5.75033	246.889	18.7876	0.108066	44.4198	0.107336	17.7979	1.31353	17.4014	103.599	17.4513	97.025	23.4607	40.4864	126.703	15.1149	92.7313
TCGA-BT-A0S7	0.0498076	0.00391977	31.8734	0.607597	0.00269262	5.87531	296.698	7.06117	135.164	35.5737	10.9349	2.86238	147.925	97.9421	1.39075	0.0103755	312.208	11.8456	149.662	3.62945	83.056	22.3581	334.885	24.932	0.000143232	20.2664	6.17241	23.0043	0.0821044	0.121621	0.8299	1.31322	1.26904	124.762	7.34348	0.00591694	47.6576	0.0260728	13.1691	0.108021	6.31908	6.79948	1.46721	87.7274	8.27954	103.346	68.5857	4.05562	42.4048
TCGA-FD-A5C0	0.0483831	0.0143186	43.8614	11.5946	0.0161974	28.8141	56.8255	17.7415	46.3833	55.8483	25.7436	2.33089	286.512	85.194	6.55651	0.0788372	156.073	15.3543	85.7077	10.8084	444.785	110.146	100.021	15.812	5.73106	23.2108	24.0706	45.5811	0.359264	4.12372	0.948796	1.81929	5.89743	15.9234	39.7171	0.0383294	39.9461	0.0722777	13.2259	1.84358	7.32682	44.0929	8.52861	66.0214	22.2709	41.315	151.006	9.58261	91.6164
TCGA-BT-A42F	0.0256405	0.007229	1.78666	5.08071	0.00332161	2.86683	18.0344	3.75502	32.1917	89.3394	13.3085	0.595819	170.846	45.9773	0.637758	0.0264425	58.2342	13.7969	84.8426	8.12094	23.2656	46.4496	62.058	14.3186	1.04698	20.7993	15.9865	33.36	0.894304	1.63938	0.741426	0.394142	5.24356	79.1212	12.5769	0.014456	21.4515	0.143198	3.85465	2.52425	4.61056	11.7482	3.04492	27.362	18.4343	31.5475	51.3354	3.36227	83.5988
TCGA-UY-A78P	0.0439239	0.0265259	5.92272	2.50996	0.0113429	24.2974	17.5098	7.15281	72.0612	110.333	23.7514	0.406938	170.677	60.8056	5.09809	0.0228644	81.0677	13.4116	126.306	12.6117	228.627	88.2267	60.8407	23.1379	2.19888	22.1692	34.9107	31.8669	0.28045	4.44911	0.899827	0.703533	2.50999	34.2312	2.02158	0.0937452	16.8746	0.192253	27.4638	2.12243	5.15355	20.4809	8.02245	97.6616	22.726	42.1786	94.5695	15.1327	47.6636
TCGA-FD-A5BT	0.0337749	0.064959	47.8319	58.8062	0.0267426	242.504	225.752	165.59	104.165	108.579	55.5575	1.36476	234.175	70.1	31.3672	0.000983226	297.786	10.735	199.942	438.681	324.199	313.145	257.523	38.8373	0.419782	25.6032	25.9355	22.0155	0.0437168	0.340586	0.622995	0.899775	1.27427	8.39616	0.000440017	0.295351	34.0831	0.215243	241.402	4.64393	2.01959	22.3857	1.56613	783.261	45.7911	68.3537	45.3253	84.229	34.1305
TCGA-S5-A6DX	0.054254	0.0228256	66.5312	55.824	0.0271215	102.116	92.6265	88.4886	65.6347	66.7067	27.9805	5.86487	221.546	54.7273	12.2086	0.0283583	97.4731	12.1044	109.873	59.6879	389.271	164.902	413.048	25.2945	0.627897	22.4887	16.0307	7.08118	0.118934	1.72091	0.668689	0.494162	1.66568	29.0903	7.32961	0.0478594	56.7054	0.123346	25.8978	2.065	4.64179	24.2578	6.84417	118.885	28.0422	32.4744	114.728	40.6845	59.4017
TCGA-BT-A0YX	0.134389	0.0121484	17.7054	9.75937	0.00408788	1.80547	4.11498	5.16105	58.2491	148.729	25.8038	0.506743	158.215	45.6609	0.281784	0.052255	76.4199	14.9884	100.736	5.7915	50.8754	68.2393	108.051	15.0423	1.71702	21.0407	14.5153	89.7007	1.51244	2.81812	1.02364	0.899348	10.4571	80.7801	5.15883	0.0265512	22.4388	0.230318	7.65227	2.16215	30.0077	50.1182	4.82617	111.834	23.5063	42.5019	395.667	1.02835	101.472
TCGA-DK-AA6Q	0.0968928	0.018262	6.91848	5.86346	0.00418381	7.32748	2.39805	11.4095	67.8143	129.874	31.8848	0.475351	245.896	89.4995	3.85001	0.0437502	65.5607	17.9776	166.21	9.84207	135.797	194.498	61.6763	22.6483	14.7006	25.8368	6.37505	27.9357	0.123285	0.776957	1.13392	2.42155	10.6039	100.777	1.50541	0.00928639	29.589	0.122685	27.7211	1.86781	13.356	52.5544	2.14429	146.89	19.1924	69.9718	1141.39	4.86131	114.719
TCGA-FD-A62N	0.0106324	0.0586139	15.8711	9.2086	0.0284903	106.566	20.9652	156.699	104.672	26.3716	33.9925	1.98181	138.92	42.1975	18.7146	0.00933178	82.9159	10.9159	98.3675	35.5307	545.136	133.383	146.943	19.2015	0.276919	23.0149	20.67	35.0261	0.118384	1.76183	0.705046	1.44271	0.94053	12.9803	4.02509	0.132661	35.3518	0.183994	57.0937	3.89126	0.626875	8.5887	5.84812	198.714	30.8386	41.0703	67.2559	30.1402	18.0409
TCGA-FD-A6TI	0.858833	0.179369	173.091	52.3518	0.0309138	25.0123	12.2086	6.38189	38.7178	255.843	35.6871	5.65515	214.892	92.5945	9.71277	0.42725	211.09	16.6067	72.7083	31.1587	112.332	367.395	56.2892	30.9314	98.0616	22.5705	38.9044	111.125	0.407191	11.9812	0.850468	6.13932	11.2019	791.477	15.4415	1.30823	64.3694	0.118536	18.0758	3.23027	148.6	304.325	23.3259	92.1421	59.6501	51.6529	269.67	17.0454	315.005
TCGA-FD-A3SN	0.712813	0.0191599	28.6252	10.4906	0.007028	24.1297	2.89992	2.3944	34.354	107.644	25.6253	0.631538	251.881	78.1672	9.93234	0.0438712	57.623	15.4556	115.614	10.5316	285.715	204.182	45.2727	19.5811	33.3524	20.4277	47.5086	44.115	0.232938	8.40189	0.849948	1.31117	5.24544	286.138	1.17527	0.0665824	31.9075	0.145845	15.536	1.49026	171.718	127.146	5.54081	91.1613	21.4472	56.8941	192.285	12.2674	215.152
TCGA-ZF-A9R9	54.2659	0.0305219	13.1912	0.651648	0.00300559	0.937936	2.72761e-05	0.0243372	0.089339	527.058	9.41179	0.0605287	114.994	86.5722	6.85777	0.392597	11.2565	16.3358	37.2475	0.905988	7.82955e-05	70.4351	0.0807858	17.0163	1821.8	16.5717	14.085	80.0663	9.90672	81.416	0.746082	2.25569	45.0971	76266.3	0.114362	0.204449	4.62352	1.22791	0.282541	1.41412	8055.09	910.957	5.57948	32.4753	15.1969	33.6999	39.7497	6.41913	770.182
TCGA-UY-A9PE	0.317159	0.0152817	16.3422	2.86803	0.0058871	24.9856	2.06548	0.66237	9.33668	83.9592	12.419	0.706423	171.07	76.6483	12.0852	0.0643075	37.0887	12.3302	60.5925	4.21451	39.0457	109.969	20.7416	16.264	38.0086	19.3512	17.8694	39.7131	0.235869	7.51431	0.722645	3.99434	3.31921	1045.95	2.8601	0.0717695	16.8006	0.193889	4.87169	0.558547	49.1857	75.0357	9.88542	57.2433	14.2475	33.1585	108.613	18.6113	145.351
TCGA-XF-AAN5	0.00721878	0.00728127	3.33515	0.180007	0.00273467	11.7636	17.1853	5.89653	51.4678	26.3065	31.3517	0.41587	145.163	78.1319	2.91007	0.0125638	38.1884	14.6979	153.295	3.1098	21.9342	66.1789	63.816	26.3692	0.260382	21.0076	24.1251	18.8065	0.0596384	1.26016	0.939715	0.220061	1.35123	20.2316	0.401304	0.0121144	9.50485	0.110967	18.131	0.793969	1.08474	3.30392	3.03216	57.605	21.3647	89.1828	211.03	4.11569	21.5963
TCGA-GD-A76B	0.1921	0.0626235	12.7449	3.56922	0.0176891	12.936	0.26607	1.23085	13.6587	114.88	30.9018	1.12163	176.459	96.7412	6.55685	0.220729	68.8567	19.1254	54.8344	5.50246	16.7638	214.603	21.5863	21.8391	122.627	24.5123	28.717	72.2646	0.86999	21.6261	0.797857	4.03912	8.01228	517.673	8.07999	0.341011	37.6365	0.145147	4.57739	2.99169	48.3517	106.671	22.695	59.5678	35.5668	41.2911	65.3682	10.3156	174.702
TCGA-FD-A5C1	0.0144509	0.13295	5.44105	31.4559	0.0561561	36.0735	82.8062	1640.34	329.443	45.7126	39.5874	4.10157	236.013	64.2784	3.80862	0.023214	158.682	15.9114	171.26	72.3814	291.28	153.642	425.157	20.3529	0.308005	24.9961	60.6125	45.8254	0.326957	2.05851	0.774433	0.781746	1.868	6.27392	27.1135	0.120542	73.2342	0.122955	53.1096	5.01798	1.15454	11.4215	14.8532	169.326	34.4841	53.2235	60.3596	6.56081	28.2826
TCGA-FD-A43S	0.020849	0.0143919	49.0647	2.42845	0.00729245	110.558	169.89	15.3792	29.4097	50.0337	20.6696	1.19901	152.573	70.9673	11.9243	0.0106676	89.5752	12.1558	116.406	19.8759	135.86	67.7528	102.201	29.7797	0.200758	21.7434	5.49941	6.22366	0.0326723	0.483706	0.667952	0.743571	1.4609	24.1147	1.14157	0.0305423	17.1099	0.0674933	26.3707	2.54229	2.51215	8.92	2.56421	101.156	23.2363	37.9875	81.5053	50.7697	27.3202
TCGA-BT-A42C	0.687625	0.0261413	17.9755	11.1606	0.015673	16.7697	7.16536	2.243	20.8315	223.098	26.778	2.69387	240.956	120.737	9.3335	0.377876	231.687	17.61	95.6088	10.2924	44.1493	243.701	18.452	30.2248	185.296	22.4056	27.7433	73.1373	0.40126	15.17	0.885837	3.60463	16.1385	338.105	14.9394	0.10949	47.7016	0.0916207	11.0016	1.95603	93.0182	122.392	20.011	58.5136	31.0637	45.2452	276.65	15.4947	200.393
TCGA-XF-A9SJ	0.106174	0.0694902	20.0509	25.1751	0.0367628	70.283	28.1727	45.3086	137.047	137.188	32.7998	1.54812	257.512	71.942	12.0067	0.0473307	252.262	14.5739	146.651	53.5801	115.376	259.392	441.334	23.6213	6.11653	23.606	36.704	48.7301	0.300503	2.92659	0.752646	2.07855	5.90765	37.5755	6.15214	0.2216	52.4762	0.22487	50.041	2.66813	6.8182	39.0222	9.06139	311.744	30.76	50.0604	76.4342	21.502	95.2424
TCGA-FD-A6TH	0.41432	3.47606	200.957	173.101	0.204519	123.628	55.9354	171.451	270.861	214.886	138.219	4.01888	408.213	135.935	28.5993	0.0382979	557.405	13.8871	187.521	51.8351	2820.68	15233.4	668.294	35.5017	49.2481	25.7854	24.6146	302.979	0.190428	0.806283	0.910702	4.55512	9.96704	71.3365	3.88445	0.70669	158.192	0.149213	129.743	2.27225	46.5606	120.899	5.79753	1315.63	107.209	88.1231	520.106	34.7393	613.494
TCGA-CF-A47T	0.109017	0.00409802	4.30282	0.587057	0.00176396	5.86468	2.68825	0.552988	8.0168	68.8437	12.2263	0.198642	181.921	80.7085	3.14189	0.0334837	28.6105	16.4463	95.3249	1.64443	6.98226	78.3567	20.2734	25.7215	15.7508	21.3326	15.0559	7.41749	0.0720303	6.36385	0.744143	0.663221	4.85301	231.708	1.07567	0.0106635	13.192	0.0811081	3.38271	0.970018	31.119	23.5107	3.41329	30.5024	15.8207	51.8792	89.7878	6.27314	109.944
TCGA-GC-A3I6	0.0330134	0.110373	49.2048	10.5209	0.0137622	20.6645	7.22558	35.4101	92.1571	45.0646	25.0269	1.45093	209.533	53.2332	4.13467	0.182501	76.6398	13.2192	122.963	8.66271	674.582	78.0887	140.063	12.2677	4.13349	21.3421	55.4315	121.755	0.214574	6.51819	1.09827	2.37263	3.25686	166.669	11.3294	0.151394	38.6445	0.193787	31.7632	1.5972	3.71415	40.3488	12.7789	48.5937	20.1299	62.2072	177.896	7.17066	68.0667
TCGA-ZF-AA58	0.00425817	0.0146319	2.88035	1.02867	0.00997809	176.985	23.8387	114.574	51.5683	12.264	30.2401	0.522273	170.747	59.9454	66.8031	0.00320999	57.0332	9.68371	172.236	5.48454	375.087	105.955	78.7351	17.6946	0.417974	21.6543	45.073	30.772	0.0463752	2.77054	0.652904	0.740845	0.865197	3.3567	1.2293	0.0259546	26.9669	0.0873131	36.0094	1.99321	0.267474	4.97004	7.18215	109.923	21.4966	61.5275	14.4667	56.8579	5.8765
TCGA-E7-A8O7	0.031062	0.00984262	34.2398	2.03178	0.00992482	20.0007	6.47806	6.88957	47.126	37.8139	20.0731	1.99082	159.795	62.0446	3.58922	0.0666228	42.2867	12.7422	78.1177	5.06218	69.1151	95.6234	46.877	16.2222	3.27337	19.8935	22.9207	18.4344	0.0940531	4.96489	0.913377	0.472009	4.1548	48.2283	14.8464	0.0476736	22.4438	0.0681479	13.576	1.83164	5.5816	12.2999	7.38115	56.7542	17.0458	37.7264	83.7037	11.2351	37.9149
TCGA-CF-A9FF	6.70331	0.0267637	11.2065	3.08784	0.00556564	2.77769	0.0115696	0.163765	1.16643	238.711	11.69	0.190247	138.768	66.1695	6.92115	0.345528	24.0331	15.3023	45.6241	2.51009	0.242312	176.334	1.81868	17.1585	809.644	18.6224	22.099	68.7938	2.81331	85.451	0.751514	2.3025	28.731	9087.89	1.09338	0.274054	14.0256	0.543882	1.40792	1.69723	1583.67	349.522	10.5163	28.429	19.949	33.3146	96.0212	5.88595	352.187
TCGA-ZF-A9R1	0.0691518	0.0272594	107.645	4.04168	0.0211038	35.4055	4.11019	4.45274	51.6967	113.544	27.0328	1.15757	347.063	139.983	7.01141	0.246274	113.031	19.5896	86.9818	5.26628	302.627	143.463	74.715	21.952	44.5337	23.6447	46.7755	25.1286	0.211326	11.4222	1.11113	0.897162	8.75571	180.866	30.7739	0.176881	69.9338	0.113599	18.437	1.9727	13.3408	112.701	11.3468	63.3887	22.9989	62.2353	226.96	14.9737	189.75
TCGA-C4-A0EZ	0.0760731	0.0194929	5.48185	1.87362	0.0330266	275.804	0.606682	5.82862	90.0062	2.49837	3.67283	0.256578	431.742	256.458	24.252	0.0457119	258.063	13.3042	106.79	1.84037	255.378	66.1417	49.3942	5.66102	0.33911	10.123	11.102	19.1891	0.111025	5.78687	0.688013	12.7367	2.529	9.58749	119.153	0.0834398	36.636	0.0743239	11.4874	0.513037	0.599077	2.21161	55.6479	54.2105	1.02401	10.0631	43.2274	29.6295	15.0513
TCGA-XF-AAN3	0.277209	0.069077	86.1082	32.0852	0.00915627	78.47	153.45	22.424	196.412	731.946	94.8708	2.80268	212.154	119.965	6.60253	0.0163959	338.511	18.3594	195.625	211.049	1127.44	1617	72.5278	56.478	4.89258	26.1608	9.87499	35.223	0.264882	0.209088	1.28214	1.88931	45.4577	16.0385	0.0307538	0.0189354	41.2403	1.42764	163.643	3.26082	52.7375	129.165	0.52741	2991.93	69.7721	87.4797	5882.94	35.5595	407.947
TCGA-GU-A767	0.0611423	0.0100155	88.792	5.32985	0.00662766	79.3223	74.2243	7.65887	22.8933	87.7476	19.4712	1.46925	237.751	135.487	9.46495	0.0432081	150.417	16.8034	129.08	5.55016	186.679	65.1372	99.3024	30.9049	1.46246	22.885	9.64243	23.0649	0.0390202	1.04242	0.713279	1.86703	2.46921	78.0998	3.18459	0.0174252	27.8402	0.0392721	12.6531	0.911493	8.06651	24.4816	8.13852	85.4693	18.8733	42.2713	95.7253	55.1834	101.967
TCGA-ZF-AA52	0.0877389	0.0191905	29.3057	7.13298	0.0136554	52.0321	2.81161	3.48991	19.3493	78.7578	25.9527	0.654367	190.011	71.4806	9.43023	0.0119152	74.1981	11.5076	88.1304	14.4662	96.8036	126.245	75.1488	14.105	24.8638	20.4863	14.1638	37.3971	0.131152	2.39607	0.653264	2.01108	4.40787	79.1721	0.983776	0.113408	24.4208	0.203391	25.8748	1.32495	9.48157	45.643	7.71057	147.165	18.1154	40.4927	58.1643	17.9131	64.413
TCGA-FD-A43U	0.121361	0.0191036	16.4589	10.2039	0.0149689	30.7204	2.83989	2.55722	23.4733	120.875	19.0526	1.06421	152.322	56.3835	6.2192	0.0200789	57.0329	12.0596	73.989	19.6765	50.7821	124.663	35.728	19.9771	6.95911	21.0045	10.3638	18.7731	0.174891	2.25045	0.677298	0.854213	4.354	108.703	0.73563	0.0951058	15.3742	0.180109	16.8504	2.32366	17.5979	52.883	5.05713	105.83	19.3842	32.381	61.7069	21.8709	67.6028
TCGA-C4-A0F1	0.0127702	0.00459983	1.91665	1.35362	0.00372734	6.13267	111.849	10.9275	173.212	39.73	16.5404	0.514128	167.085	50.3714	1.01205	0.0104217	50.9222	13.3186	131.346	5.44122	11.6028	31.1412	231.802	16.2682	0.0540286	23.9643	16.247	25.8006	0.617954	2.59579	0.919258	0.133114	1.33339	11.9644	9.49662	0.0137721	13.7092	0.212257	16.5473	0.73415	1.69075	13.8001	6.5036	64.0556	12.7838	84.4656	53.2865	2.38851	11.2948
TCGA-DK-AA74	0.0084783	0.0145317	8.38372	6.89393	0.0106487	150.63	50.6783	330.344	118.796	34.4374	41.0828	1.18445	202.151	52.7515	14.9088	0.00256904	126.884	9.62049	160.528	57.6619	229.128	82.1577	186.668	20.8209	0.0934237	23.8915	13.4333	15.7266	0.0473894	0.484952	0.626374	0.709286	0.802264	2.74086	0.139117	0.0425841	24.1359	0.0923206	103.936	3.3377	0.331328	8.10343	5.01167	303.384	29.9264	42.2615	37.4511	58.6906	9.17828
TCGA-XF-A8HI	0.0467054	0.00719947	15.1286	0.61446	0.0057829	20.4565	7.09232	2.1302	23.4659	69.2443	16.287	0.622178	187.518	123.395	4.66636	0.0631416	73.3468	17.5925	84.8025	2.82263	13.9634	86.4751	24.7818	22.1868	10.822	21.3489	18.659	15.2768	0.109004	7.21964	0.926747	0.507069	5.94203	102.806	12.9119	0.0361521	16.2428	0.0657437	7.79348	1.65286	9.42766	30.7896	8.1083	46.0541	18.991	50.8692	67.9126	14.4889	37.5755
TCGA-UY-A9PH	0.0701535	0.0157056	14.4641	3.59865	0.0120439	25.5302	5.26534	5.85873	27.8154	48.1727	18.8049	1.01632	154.791	56.5883	13.5058	0.0797626	44.3939	13.8034	62.0419	5.24801	61.7361	180.358	46.4198	13.0947	12.7202	23.2935	25.8084	35.9469	0.250677	17.6009	0.762855	1.36801	2.90654	162.148	15.322	0.0667698	24.0419	0.160885	14.6809	2.36512	9.17122	34.317	12.2821	53.4572	21.1558	43.6607	84.0146	12.4949	53.7893
TCGA-LC-A66R	0.0315111	0.0207471	8.52854	3.56652	0.009589	22.9899	10.8653	12.5623	41.1748	19.8479	19.4777	1.01288	168.121	52.9311	6.3773	0.0304087	40.5234	11.8924	102.135	5.36125	108.277	100.053	121.584	13.2895	1.54696	19.6291	40.8877	44.2321	0.0750165	5.59533	0.852318	0.937522	1.47851	48.4359	5.89723	0.0356893	29.4942	0.138715	20.4383	0.813818	2.499	10.5983	11.5235	52.7592	13.0434	51.1286	65.272	7.77261	15.4082
TCGA-E7-A85H	0.161277	0.00670391	26.9238	2.66592	0.00552762	39.2133	6.99421	2.88839	21.1811	88.6083	24.7022	0.625324	225.16	119.603	7.71973	0.0912324	88.6915	16.6165	91.1154	2.773	116.023	128.896	35.5671	24.0664	16.2602	23.0993	10.985	18.3753	0.0921994	4.19096	0.757962	3.61784	3.53998	93.5665	15.4758	0.0158677	20.4085	0.0815709	9.95832	0.984074	21.9847	62.773	10.9323	28.1473	20.3755	44.307	147.657	24.9903	70.7021
TCGA-UY-A9PF	2.6373	0.0306771	19.8834	2.76905	0.00487317	3.27762	0.00554051	0.122643	0.753204	171.853	16.588	0.372506	144.958	78.1545	7.84473	0.542684	33.0562	16.2039	44.8693	1.54898	0.34942	132.784	0.528767	18.8611	705.078	18.0398	24.7889	110.451	1.64234	79.3649	0.838878	5.21417	20.9676	17680.8	2.43142	0.195249	15.9168	0.495665	1.09159	1.85744	686.06	429.415	10.6415	24.661	31.9224	44.5083	63.3478	5.55064	498.317
TCGA-XF-A9T4	0.0113395	0.0178345	36.5828	4.02686	0.00916709	65.0693	230.531	300.712	347.281	29.9532	31.4702	2.01665	243.066	52.3813	6.05359	0.00743518	87.9703	9.62687	158.625	21.3712	380.681	90.1661	372.468	16.4774	0.484728	20.8529	42.7374	31.5421	0.0373722	2.21147	0.902913	0.100066	0.924908	13.2063	3.1657	0.0438785	61.6253	0.0564508	92.0913	1.24428	0.881272	10.9312	8.42429	239.35	18.2809	86.3828	111.629	18.3604	28.9703
TCGA-XF-A9T8	0.00730661	0.0103481	3.77656	5.59187	0.00694198	17.8475	349.511	177.594	218.854	52.8226	19.2501	1.06673	177.586	46.3674	0.699803	0.00900686	124.681	14.2543	134.278	14.7299	123.87	35.6874	521.98	14.5489	0.0107113	24.5721	20.0339	32.7791	0.389833	0.701874	0.912837	0.276056	1.82648	3.81788	8.82723	0.0167391	16.5568	0.164264	15.1798	2.07121	0.667391	3.36869	4.67215	126.732	16.2441	38.9066	49.5843	5.2083	10.0048
TCGA-KQ-A41S	0.326955	0.030109	27.5702	17.1227	0.0132192	25.881	2.61724	3.05153	26.3087	114.66	18.2665	1.53404	175.301	55.7887	8.05474	0.0643247	92.1835	11.1753	59.8934	14.7771	52.9005	185.852	66.1184	9.99437	35.5008	18.1108	17.179	106.736	0.272917	7.88175	0.715096	3.56401	5.84838	341.093	9.75467	0.128244	18.7517	0.1938	17.1977	1.40098	58.6572	117.696	16.5431	72.9935	14.9779	34.4205	114.05	18.3394	86.9599
TCGA-BT-A20N	0.164347	0.00711407	11.144	4.84982	0.00347945	11.34	85.5498	7.65928	31.3085	36.0256	13.4505	1.4076	185.889	64.5613	3.54924	0.0639363	125.837	13.3909	95.617	2.8838	692.824	96.6176	38.0223	17.0545	6.51676	18.1503	33.8928	42.3449	0.103602	5.97059	0.848485	1.70749	2.74588	20.6438	7.70139	0.015304	30.0836	0.0209519	16.1224	0.299829	13.8784	26.6572	13.5254	28.5981	9.53881	78.4454	301.437	6.37327	110.344
TCGA-XF-A9SX	0.0165829	0.0854954	134.648	18.0074	0.061047	260.52	55.8508	465.108	264.18	89.8339	63.7748	3.18516	230.624	100.909	37.6801	0.0114122	689.41	14.0325	208.908	52.0334	1777.29	230.273	639.656	32.7549	2.60389	24.0679	121.991	89.7355	0.0760205	2.16502	0.63157	1.4776	1.25956	44.2157	1.01485	0.427587	55.4275	0.279944	200.865	3.08209	0.973172	47.5735	9.79369	558.488	34.8642	68.7026	80.5327	66.6395	40.0178
TCGA-XF-AAN0	0.512701	0.0663875	27.7263	24.3331	0.0261128	6.46674	0.669016	1.3897	56.4601	142.245	14.2904	1.24747	164.465	65.3031	2.7518	0.194908	198.748	14.9985	64.2649	10.7471	80.5117	239.598	138.803	10.5937	14.0247	20.3037	24.9834	176.32	0.996946	5.72207	0.921281	3.64685	24.232	1280.04	23.4616	0.423146	18.9168	0.32061	10.9998	2.92257	89.3314	195.013	9.79222	168.81	15.2015	24.5346	106.057	4.81793	212.786
TCGA-GV-A3QI	0.0936701	0.0774943	88.6602	25.2489	0.020369	21.3385	2.19768	9.98476	28.4593	68.0551	7.82536	5.79768	219.93	60.2348	6.19263	1.17818	237.58	9.07658	62.0595	4.99256	135.009	282.741	142.445	7.28936	22.0791	11.2942	14.6054	110.416	0.0979999	4.09769	0.687172	16.6122	9.36311	96.2698	136.46	0.165109	20.2983	0.0310101	11.617	0.106171	14.0198	21.8518	27.3056	22.4275	2.46161	28.0398	174.794	10.9403	90.5712
TCGA-C4-A0F7	0.144827	0.00948557	13.8896	1.229	0.00170594	5.93535	1.32211	0.673442	20.247	133.323	9.6795	0.16743	176.874	79.6743	4.32365	0.149832	118.748	13.61	71.8298	0.977442	32.9528	59.2659	30.4415	15.7061	2.94153	17.6194	16.2513	53.6433	0.589178	12.0966	0.866641	2.46308	5.77705	2136.16	27.8569	0.0138437	14.5493	0.103057	3.77271	0.256164	25.8438	134.847	9.62202	29.9123	7.2956	73.5424	221.792	5.09465	150.432
TCGA-UY-A78N	0.0938086	0.0182401	68.2721	9.09096	0.00935643	39.5831	29.1147	5.70709	35.9223	82.3604	14.2232	1.8763	263.2	152.232	6.54931	0.0611302	162.402	16.2652	120.64	3.75887	319.643	94.7939	120.263	22.4479	2.01752	18.8356	12.8752	28.7069	0.0591098	2.13223	0.795609	5.85542	2.58224	71.8347	16.6135	0.023428	40.6395	0.0397095	8.74647	0.303631	13.0206	19.169	7.26552	53.6603	8.92603	61.6784	161.736	18.0918	132.366
TCGA-DK-A6B5	0.283205	0.298702	178.469	92.1262	0.0232028	31.965	8.75328	46.7655	131.579	151.389	32.7426	6.35946	281.55	67.741	3.49152	0.0811118	191.649	14.6909	112.29	47.693	880.907	94.0982	217.805	13.4222	8.59174	22.5494	26.658	128.761	0.600481	1.29295	1.01098	4.45774	8.36242	21.4811	22.7729	0.0757689	82.1227	0.136211	22.5669	3.23055	23.4074	89.9156	17.042	153.591	25.3917	45.2203	109.547	11.0166	185.911
TCGA-CU-A0YO	0.300427	0.0191823	15.6976	2.38325	0.00461017	4.20037	0.336635	0.495775	13.5788	133.041	13.1486	0.627607	129.322	56.5634	3.1565	0.221418	37.6314	12.6336	55.047	3.43705	5.75133	109.564	8.91721	14.2943	37.9539	17.8874	29.1742	85.1482	0.639221	20.4775	0.832909	1.64462	8.36446	3958.99	3.47834	0.0786191	12.5391	0.258359	3.90255	1.5242	111.074	136.036	8.67288	34.1908	17.6879	36.717	140.94	5.65084	164.492
TCGA-ZF-AA4V	0.0215414	0.00871213	4.05782	9.16772	0.005302	25.4306	108.957	11.7789	96.2761	43.8142	21.5526	0.934131	224.803	88.6723	4.96647	0.0166697	144.625	19.6557	161.875	6.04095	116.735	103.813	311.156	25.0758	0.849484	26.5403	15.9546	27.6013	0.192111	1.26948	0.748357	1.82722	3.96757	22.0735	31.3797	0.0153916	18.3837	0.101967	29.8523	1.72217	1.68139	9.88367	3.3603	90.3908	20.0454	69.3455	64.2371	7.0021	37.9739
TCGA-DK-A6AV	0.444969	0.0151732	22.9292	5.06554	0.00719333	9.12399	0.117837	0.401159	10.5679	180.836	21.4327	0.318935	241.048	104.412	7.09299	0.299148	72.1674	18.4044	84.5691	2.11153	33.82	102.529	6.10948	21.9717	140.742	19.868	27.1373	41.7116	0.752763	19.0241	0.86728	1.39461	7.65904	462.516	4.09616	0.0999532	18.1845	0.176753	2.5469	1.83675	114.041	123.011	6.4508	48.7967	22.5366	37.101	110.816	8.28094	361.474
TCGA-DK-A6B1	0.0116763	0.0800999	60.126	8.17314	0.0274455	40.9608	16.3187	11.8398	50.401	31.5093	28.3579	5.91249	221.935	98.0485	9.83767	0.150857	112.633	13.4644	74.2465	8.75525	247.778	85.4918	123.246	21.1741	0.715936	22.8199	11.6191	25.4925	0.0545064	2.85986	0.767102	3.52004	2.09378	21.1267	65.5834	0.068626	16.7583	0.0301537	11.9711	1.18144	0.825818	6.03413	13.0916	49.8324	25.8049	42.0143	46.1315	22.5932	39.6573
TCGA-CF-A27C	0.0555631	0.010323	30.9332	0.920547	0.00520629	20.5858	16.11	2.60271	26.4211	55.3564	20.3723	0.614948	181.123	119.428	4.3237	0.065666	103.413	16.7962	83.9937	3.10523	51.9599	64.8194	26.7345	24.5695	3.20758	20.7838	17.5449	12.3545	0.0848647	5.20646	0.933953	0.61112	4.18658	105.361	12.3232	0.0280229	20.5818	0.0653017	8.02359	1.02199	11.5756	28.0438	8.8372	47.2116	23.0021	56.4116	71.5542	11.4961	63.5919
TCGA-DK-A1AG	0.0259939	0.00447625	17.8918	1.24427	0.00470795	47.0216	58.4443	13.3037	50.2759	65.3982	16.7089	1.1077	231.385	104.982	3.55773	0.0255367	60.1165	14.4419	107.747	5.83302	55.1785	71.9243	88.2697	21.5623	1.37242	20.8412	11.9201	5.5474	0.040769	1.85012	0.839277	0.452179	2.743	15.9918	6.47772	0.0139616	22.8032	0.0372925	13.6874	1.47075	2.95165	13.6858	7.03779	69.3754	14.7885	47.4026	110.059	22.4127	27.8512
TCGA-GV-A3JX	0.0611793	0.451851	32.1773	15.3252	0.044984	70.0256	0.610181	12.9102	61.9787	81.0943	21.0849	6.76158	290.407	80.4751	14.4623	0.190232	141.844	14.5566	66.7568	20.974	739.228	266.169	65.862	8.37991	19.1844	19.3078	45.421	193.652	0.486662	9.01271	0.974703	2.87445	9.34531	93.1712	78.3626	0.431623	31.7828	0.172548	28.5862	2.23404	4.78404	40.461	31.9587	69.6108	12.1554	27.7202	153.283	24.3296	66.6955
TCGA-ZF-A9RN	0.0860872	0.0153731	7.91028	1.2522	0.00178074	85.2794	2.22043	11.6115	154.548	47.2022	24.2982	1.13651	194.961	101.519	13.4516	0.0523886	330.265	13.7934	159.203	2.49716	276.645	59.919	415.271	10.8595	0.417	20.3744	3.60385	25.5761	0.119314	0.647521	0.635475	3.364	1.41351	7.79162	7.92074	0.00262845	19.2908	0.0662088	14.2526	0.609937	4.4087	1.23143	68.1525	56.247	8.23751	47.6922	23.5639	35.5937	2.61737
TCGA-ZF-AA5N	0.099048	0.0460029	157.683	22.5433	0.0172729	40.2902	1231.87	79.5846	270.743	81.7309	38.6182	2.34978	280.252	86.7806	7.15965	0.06573	165.37	14.1167	157.057	15.8888	668.289	286.132	880.88	34.8092	1.39756	25.1897	24.1886	18.4204	0.0552806	1.23234	0.806648	0.970028	1.32455	44.0917	4.63931	0.0576128	119.56	0.0555225	82.6093	0.980997	9.9442	31.1498	6.27961	146.346	54.8538	76.5248	195.966	13.9388	130.866
TCGA-KQ-A41P	2.09653	0.0446736	29.615	5.0745	0.00511849	5.01925	0.0282625	0.237776	2.84529	338.048	17.1028	0.291445	162.38	90.1669	4.52368	0.185806	37.3155	16.5191	67.955	2.37376	4.98197	131.419	7.89984	25.307	281.589	19.6729	16.3116	83.3783	0.563721	7.34844	0.783307	2.67779	26.7895	3710.44	0.370022	0.129641	17.1253	0.312322	1.74191	2.10458	430.82	242.037	5.4773	60.1952	29.2929	36.3015	106.308	9.09831	522.919
TCGA-FD-A3N6	0.0234246	0.00950921	20.4745	18.8379	0.00701126	0.942976	15.0237	22.3577	148.558	12.557	9.38884	1.36991	135.484	25.1597	0.258018	0.00655187	57.8615	8.86262	118.021	5.28908	493.961	17.4958	412.334	9.09495	0.000245201	22.555	9.59652	29.9765	0.323904	1.14671	1.03417	0.453035	0.64219	6.23689	3.17874	0.0148033	11.6809	0.096769	22.0472	0.366635	2.06852	15.6521	5.6068	26.6031	7.59949	51.0919	48.6112	0.444849	3.13702
TCGA-K4-A3WV	0.0597161	0.0135706	71.3716	1.54868	0.00482558	21.7885	13.199	2.00721	14.3565	70.444	17.8796	1.60783	152.294	113.91	3.72978	0.0913003	79.2511	16.0107	76.7443	4.02931	20.9152	65.9439	28.9278	28.4257	2.94177	20.4309	9.58973	19.0667	0.0956642	3.06735	0.86363	1.93887	3.80398	342.419	8.663	0.0360991	23.5682	0.0707626	7.14993	1.28768	13.2534	21.4929	4.79319	33.675	24.5678	51.021	75.823	16.8545	92.0232
TCGA-UY-A9PA	0.00872604	0.0360244	18.8723	10.8749	0.0163391	56.2717	41.9573	52.011	165.825	31.8284	50.6171	2.8208	233.8	81.0694	9.90457	0.0652645	115.215	18.5539	122.706	9.1152	612.911	69.7355	75.6678	22.6452	1.01322	28.5127	106.346	59.4633	0.149479	10.3091	1.26717	0.433933	0.97442	28.8207	27.5178	0.147005	22.5819	0.0507884	38.7381	5.54244	1.00178	10.8533	16.5608	69.3967	58.0589	84.2352	123.707	18.267	19.7239
TCGA-ZF-A9R0	2.47359	0.010392	5.87915	0.945106	0.00221538	0.233507	0.00227439	0.046057	0.273136	233.1	10.102	0.0663972	142.702	71.3217	3.3377	0.346891	19.7708	15.8072	37.4022	0.936155	0.0184888	87.6092	0.102621	13.473	1494.94	18.2625	15.2276	72.3663	2.12613	57.5342	0.789801	1.88846	22.323	14254.8	0.270088	0.0476539	9.29949	0.339429	0.601416	1.63956	1496.66	355.328	5.27359	16.6998	20.2058	32.2872	63.805	3.40907	445.761
TCGA-DK-A1A7	769.743	0.0113636	1.59857	0.19538	0.00130405	0.00612191	2.60054e-07	0.00931116	0.00260526	731.573	7.16189	0.0142162	96.528	79.7469	2.81644	2.01147	6.34821	19.1515	29.7238	0.400954	0	100.988	0.00095005	14.7462	18587.9	16.3516	16.4088	238.589	115.004	586.592	0.66776	3.72077	182.523	518022	0.00854089	0.236597	2.69237	1.69095	0.0630473	1.71534	116345	1877.62	5.97474	14.3323	15.8837	23.1363	50.1156	1.49892	1357.69
TCGA-DK-AA77	0.0194871	0.00748906	33.4632	1.3357	0.00904565	83.2642	103.252	75.6099	143.206	49.7296	21.1102	1.34864	199.88	61.0644	8.82431	0.0297989	165.761	12.1817	113.363	5.13839	484.091	78.1464	116.776	20.018	0.444959	21.4082	21.9711	17.3187	0.0802614	2.06738	0.868423	0.73	1.79759	25.928	29.9677	0.0431076	31.7728	0.0416856	33.4123	0.964389	2.33063	15.4323	7.03237	106.209	16.8358	56.8024	171.864	21.3732	29.7221
TCGA-5N-A9KM	1.99406	1.21387	177.092	67.1033	0.089105	50.3208	6.16723	8.44497	34.4563	449.279	52.9781	3.29376	222.627	96.9887	22.9405	0.176689	251.322	14.7619	117.746	64.0948	579.961	1682.17	22.2418	47.4699	116.862	21.2507	16.7443	205.873	0.785832	2.84762	0.910705	9.92357	17.5504	704.017	1.17826	2.01723	85.7037	0.223191	41.3189	2.3974	233.091	613.473	7.91597	249.231	52.9237	60.5755	873.043	34.5689	697.44
TCGA-XF-A9T5	0.0217497	0.0194845	12.6958	2.38739	0.00557678	35.6625	11.5342	34.434	117.179	28.398	20.7673	0.409816	147.778	48.5238	10.3291	0.0560556	78.3855	13.1431	116.778	6.88569	230.766	156.399	123.893	13.6862	0.277164	21.5916	14.248	54.3112	0.114801	2.23534	0.756525	4.63137	2.19901	29.28	22.5298	0.0361441	17.9225	0.0838004	22.1503	2.48582	1.72178	11.8264	8.53974	64.4311	17.023	40.414	226.088	11.7604	31.7746
TCGA-ZF-A9R3	0.473921	0.123957	739.722	47.3832	0.1004	30.8436	8.92021	7.6451	60.3905	169.857	37.8385	7.47846	222.641	109.542	8.78148	0.861431	264.907	17.3994	83.563	27.1825	311.186	233.882	85.7268	27.8416	30.9868	23.2701	46.0581	88.4283	0.336598	10.4533	1.04484	4.15899	8.24265	646.332	36.0157	0.792011	71.0961	0.0752561	16.3255	2.58121	46.4397	181.052	33.5948	81.1379	47.5206	45.1123	147.196	23.8148	220.066
TCGA-XF-A9T6	0.022777	0.0164978	43.0984	3.56638	0.00713175	77.8602	532.702	53.1988	113.012	74.7954	35.5729	2.0657	305.716	117.095	10.454	0.0553178	344.556	20.2458	355.82	17.2379	1886.67	128.207	1137.8	39.8006	2.09611	24.3817	232.25	16.6076	0.131274	5.87294	0.780949	0.988924	1.2486	8.49489	4.27601	0.0363319	62.9269	0.23741	94.8737	0.73669	2.20347	29.1561	10.8814	114.028	27.9896	79.1085	257.824	17.8502	65.8206
TCGA-4Z-AA81	0.076171	0.167684	68.167	9.32326	0.0510139	99.3035	9.11252	36.2186	200.824	75.4371	48.0669	1.97928	268.564	104.854	33.3552	0.0729208	213.579	19.9266	168.907	15.5151	251.073	347.062	467.613	23.3371	6.99803	25.4306	163.97	78.2499	0.269822	10.8513	1.03866	0.461355	5.30646	71.6261	44.1973	0.370231	45.2223	0.532031	49.1924	2.32443	6.02518	44.4985	10.1235	358.513	35.1984	76.0499	187.844	23.4403	121.972
TCGA-XF-AAN2	0.013261	0.0438484	14.9336	10.0161	0.0238006	26.0482	40.9466	197.005	182.168	34.5959	37.53	2.57303	191.783	77.3208	3.42292	0.0400108	279.509	16.2765	150.868	12.3932	401.082	93.9921	384.943	20.1146	0.211033	25.3765	62.9588	81.3155	0.295794	1.93193	0.929149	0.63336	2.46499	10.4142	41.0421	0.0517002	32.5815	0.0981015	40.3901	1.8548	1.72457	11.8148	8.11172	114.314	25.3223	59.7604	56.7289	7.42533	20.7369
TCGA-4Z-AA87	0.045018	0.0074039	14.9282	1.67807	0.0066196	59.5341	39.6255	5.15257	16.6801	43.6141	27.0228	1.44714	236.611	158.55	17.7056	0.0398356	234.878	18.1494	104.651	3.34288	182.832	177.55	99.7241	26.5416	2.0337	25.8287	14.0517	18.2107	0.0316008	2.00878	0.776463	3.16278	2.15899	39.4228	6.36297	0.0125365	26.6342	0.0249175	8.08669	0.448605	8.82362	7.22751	9.07145	49.2874	21.0369	52.8088	110.92	25.6023	101.12
TCGA-CU-A5W6	0.33972	0.0479227	39.8999	16.2456	0.0315321	13.7235	3.23526	2.35106	54.5248	224.98	25.7905	2.55136	199.396	89.906	3.00438	0.433873	126.75	18.5527	74.848	8.93738	202.354	125.864	99.8353	27.29	28.7059	24.6328	31.6017	50.8823	0.623063	8.09363	0.823502	2.62751	11.7034	276.346	10.4753	0.242042	26.1141	0.180467	12.9318	2.87965	44.7964	85.2246	19.525	92.6672	31.6817	31.3025	74.1754	10.8777	157.311
TCGA-CF-A3MH	0.485391	0.0235354	86.8425	10.7453	0.0130166	62.7459	6.53586	3.37186	51.3894	188.161	25.8609	0.972475	253.97	115.606	12.6757	0.211529	121.031	18.3048	91.3764	8.17919	105.963	148.837	83.8702	27.3453	21.7222	22.5725	39.6316	31.4756	0.453229	17.5177	0.904037	1.97315	7.20163	544.095	16.5044	0.238355	30.8744	0.371449	14.8704	2.15367	53.3957	136.41	15.2398	112.413	30.7359	50.0112	241.355	26.8417	194.108
TCGA-CU-A3YL	0.432706	0.0205724	32.8164	3.65815	0.010369	7.60446	0.427204	0.698543	12.0069	134.309	15.5294	1.05851	209.82	101.192	3.42146	0.222411	44.4094	16.8707	55.602	4.92668	3.35629	130.902	13.2805	18.6871	52.3178	22.1582	12.3303	23.3368	0.284453	8.59527	0.918773	1.90888	11.7259	845.652	2.15244	0.0736803	19.8544	0.072692	3.08218	2.38252	94.2105	87.7521	10.7654	43.5931	19.5733	32.8017	70.8713	14.3636	147.148
TCGA-E7-A3Y1	0.615298	0.00646311	3.05092	0.325153	0.00200455	1.42694	0.0339752	0.146251	1.58686	152.089	8.78595	0.106323	134.353	90.1797	2.64268	0.124878	18.5591	17.4819	54.8736	1.23232	0.0247224	84.0081	2.53705	17.8093	193.821	18.5414	15.15	24.5893	0.500389	25.4033	0.750464	1.00139	15.8949	2308.15	0.796405	0.0371792	7.32048	0.158036	1.03819	1.3251	219.953	88.8586	5.4942	23.1653	13.6066	33.2986	69.5353	4.29642	170.619
TCGA-FD-A62O	0.330283	0.0286175	56.0279	3.77963	0.00680045	7.1144	0.334579	0.612242	10.5181	138.269	19.2357	0.890679	176.836	95.554	3.79648	0.25168	48.7265	15.6437	61.1467	3.13964	14.2858	118.034	14.1004	19.9508	28.7058	19.9224	17.9113	48.1469	0.231611	8.90291	0.943888	1.72935	5.91169	1627.37	4.83299	0.0616595	25.8006	0.145322	4.14985	0.886621	95.1024	101.309	7.4141	34.0686	24.7532	56.8576	84.2963	8.20896	221.794
TCGA-GU-A762	0.00712122	0.0368467	14.2264	3.87914	0.0115218	99.2915	39.5051	550.912	195.477	23.1458	56.8187	2.02767	220.831	72.8808	16.162	0.00685551	67.9276	15.0344	257.548	30.993	484.091	99.0489	244.376	24.5197	0.405836	24.2658	63.0494	19.9993	0.0883133	2.24143	0.781115	0.91835	0.681255	12.2055	0.903073	0.0810017	55.204	0.112823	80.9884	2.70135	0.277339	11.3034	8.05893	169.003	30.5779	47.7697	101.867	24.5048	18.4554
TCGA-2F-A9KP	0.104312	0.0124801	64.7046	9.04012	0.0122776	13.2882	72.0031	4.82648	41.2881	85.3053	17.0928	4.09149	229.728	103.767	1.92129	0.159973	100.099	15.4055	82.2781	4.57512	175.418	181.351	45.8037	17.1769	24.9276	20.0059	21.1691	20.2975	0.13965	5.72139	0.862904	4.18657	5.77764	109.635	29.9029	0.0296696	39.8554	0.0231776	8.09804	0.562369	25.6721	32.0611	14.1665	30.556	16.8893	50.6471	217.146	16.0894	143.742
TCGA-ZF-AA5H	0.0910227	0.162826	79.7691	8.94439	0.0602448	96.3467	57.4065	104.427	260.478	63.6038	59.4262	1.45585	246.714	69.6083	25.6137	0.0214028	266.505	12.7126	178.519	33.05	1423.44	439.897	301.076	24.8883	25.7117	23.6233	89.4673	122.309	0.606031	9.81459	0.904729	0.873618	2.66247	97.3381	4.13665	0.574436	69.2372	0.644184	221.563	1.1986	7.48327	142.311	15.7858	494.833	31.4741	115.605	259.187	22.1748	109.309
TCGA-XF-A9SU	0.0534933	0.0144468	36.1268	5.44688	0.00795013	47.7208	36.3196	6.81958	27.402	53.7443	21.7584	1.28497	221.117	75.631	8.41109	0.0215754	66.3792	12.988	101.055	10.9167	74.3607	112.213	79.4045	26.1593	4.69722	21.6509	13.029	15.0339	0.0492917	2.00947	0.713755	1.0532	2.14524	44.2646	1.40143	0.0359973	29.4502	0.058168	18.7753	1.30119	7.84377	22.5048	6.62633	82.6119	23.419	48.4633	79.7018	23.5799	69.8891
TCGA-DK-AA71	0.0205322	0.0452358	57.6888	14.2236	0.0312955	87.11	347.246	132.552	227.905	98.5519	42.2787	4.73371	318.209	164.647	3.88949	0.0534462	337.713	21.1141	152.08	27.2864	632.744	233.236	505.612	37.1734	1.93177	27.5372	30.6156	19.7479	0.0931223	1.67723	0.926395	1.76047	5.33808	27.4772	56.7246	0.0712463	94.8516	0.0992301	36.4675	2.17316	2.11885	14.4975	12.4765	184.78	38.5109	61.2998	262.27	29.0484	93.8285
TCGA-XF-A9SH	3.11812	0.0253613	19.6975	1.08136	0.00389288	1.96256	0.0299531	0.134326	1.59827	239.66	13.4456	0.275922	123.706	90.3349	4.4831	0.271588	23.8351	16.2066	53.81	1.79006	0.253732	78.4094	1.75526	21.9714	280.822	18.6658	13.7939	40.1025	0.96513	30.9318	0.80182	2.95084	12.9162	6421.15	0.960099	0.124266	14.5076	0.305651	1.01017	1.0026	668.823	152.34	7.28515	27.5932	22.5729	44.9872	92.5068	5.72383	363.977
TCGA-GV-A3QK	0.16572	0.0127886	6.51044	1.05659	0.00521105	3.07381	0.042256	0.324481	4.66708	82.5063	15.5869	0.631268	133.136	66.4655	3.55296	0.31097	24.965	14.4046	45.7056	2.00528	0.915036	69.657	4.06676	15.7169	93.083	18.7037	21.4655	47.4467	0.722333	30.3385	0.803486	2.04254	7.12555	1874.6	7.33511	0.0849943	13.2612	0.191869	1.75596	1.41426	54.7262	66.2135	15.2922	17.7933	21.2788	35.5266	67.9794	4.19471	151.688
TCGA-5N-A9KI	0.115755	0.125847	50.4555	49.1881	0.0367433	55.9395	20.6291	26.0809	100.743	79.2571	25.8583	2.67405	171.697	42.3982	10.5944	0.0705837	134.546	11.7165	75.771	60.6689	746.703	164.052	287.081	11.581	8.40778	22.7907	23.3674	150.076	0.293072	2.60879	0.648246	4.12447	5.4775	53.8006	9.22994	0.529587	22.3383	0.0872078	68.6167	2.8168	17.6191	112.55	23.1664	122.26	22.9912	27.5571	113.212	14.6142	62.8797
TCGA-GD-A6C6	0.00717377	0.000286927	14.173	0.988755	0.00134025	269.976	1050.21	351.408	232.985	111.314	26.2764	0.382054	281.866	76.5328	2.98471	0.00296722	188.046	11.7302	358.205	8.28741	907.292	28.7753	2030.05	21.5624	0.0049422	21.0467	9.83376	0.940482	0.00641762	0.187228	0.456773	0.0547495	0.244309	0.181117	0.00479672	0.00315221	5.91448	0.0244826	132.785	0.561299	0.258324	4.72838	7.37779	423.473	9.1166	32.2634	57.3399	142.939	1.02317
TCGA-DK-AA6T	0.0237144	0.00262558	1.34419	0.13545	0.00166999	11.8747	0.120758	0.185387	1.52636	13.2106	3.674	0.031435	75.4642	39.2961	2.19202	0.0187088	24.5768	8.66978	45.8735	0.442185	1.17992	37.2171	11.424	6.18933	8.14682	12.5093	2.14194	7.86793	0.0389622	0.939961	0.441614	2.29442	2.51317	229.734	0.601611	0.00763055	6.84201	0.0428682	1.38984	0.997096	3.89344	4.87229	10.6496	24.428	2.71257	13.0933	4.97736	7.5312	15.9344
TCGA-DK-A3WW	0.00124454	0.00249296	0.526292	0.146115	0.00201125	27.5155	93.371	109.934	144.384	11.7495	25.6159	0.244265	151.233	49.1888	2.87072	0.00258793	41.3046	11.9302	222.138	4.67153	84.0075	23.681	155.908	21.1533	0.00459437	21.4549	21.2275	10.8758	0.0834854	0.649674	0.833667	0.0346294	0.326238	0.417903	0.77823	0.00673297	7.68163	0.0838912	32.9832	0.814194	0.0803195	1.03878	3.28255	77.9476	14.1406	72.9561	24.2371	10.0706	1.22144
TCGA-E7-A4XJ	3.67982	0.0102311	14.3045	0.32402	0.0016451	0.819268	0.00110493	0.0475674	0.153691	242.55	10.4814	0.0436442	124.294	100.739	3.13177	0.324208	16.0909	18.3212	49.1849	0.61757	0.00675114	66.4265	0.502061	20.9409	430.547	18.2577	11.0542	30.8341	1.04185	27.0554	0.764501	1.45624	25.5206	12004.3	0.322012	0.0419721	6.31732	0.473549	0.32423	1.28783	1202.44	194.972	4.1654	25.1871	20.8001	33.7874	31.516	5.06497	491.936
TCGA-HQ-A5ND	0.0228591	0.0149648	4.17482	0.661682	0.00773973	17.3233	177.969	11.6293	101.033	83.0434	32.7052	0.402082	313.793	73.8867	3.5436	0.0587157	83.8631	15.6938	183.369	4.78098	605.286	123.224	119.771	18.9905	1.77738	21.4819	36.7158	31.8593	0.159569	7.37988	1.12696	1.12636	2.69607	16.2914	7.61567	0.033747	14.5667	0.0355975	42.4444	0.636165	4.35445	23.9941	12.4481	45.5102	12.403	77.6623	597.843	4.23133	63.1289
TCGA-GU-A42R	0.498249	0.0254845	64.545	5.65958	0.0173669	18.1637	2.29043	3.76313	42.7853	147.627	34.1877	1.63502	223.916	156.649	3.18006	0.20705	216.104	17.8187	78.1411	7.80851	55.414	169.271	60.7376	27.3349	24.9413	23.5192	39.6319	70.8864	0.264182	6.57957	1.02463	1.50258	16.609	353.742	24.2661	0.161734	48.1977	0.107172	8.56095	1.4582	53.3843	107.789	14.3899	105.142	29.4748	52.2398	96.5759	9.17037	240.251
TCGA-XF-A8HB	0.162046	0.0949169	67.0505	21.0214	0.0141367	50.1707	74.892	22.8337	53.8266	121.125	21.1382	1.25942	264.506	85.6796	11.0463	0.145175	187.981	15.9942	185.699	16.6917	780.746	181.203	141.264	25.7214	9.50004	21.8669	28.7787	72.1888	0.137605	4.28235	0.865366	4.34186	6.08855	97.0685	19.2732	0.0578347	54.7844	0.105343	20.7316	0.884348	33.318	30.8225	10.8836	36.5717	18.9304	52.0515	607	19.2128	332.23
TCGA-G2-AA3F	0.2148	0.00921741	38.6545	6.36181	0.00815285	8.4325	1.25935	1.53166	10.765	51.6603	17.2239	1.19946	186.075	83.0165	2.44297	0.114181	42.7219	13.6498	64.0211	2.80447	19.2525	150.258	27.5061	14.3839	48.124	18.6805	16.5777	29.6601	0.173512	9.41005	0.8665	4.21811	5.70667	354.635	11.219	0.0322578	28.3169	0.085466	4.71117	0.925967	38.6055	43.7153	16.1094	21.901	16.7669	30.623	188.229	9.259	113.224
TCGA-FD-A3SS	1.56165	0.0338	22.123	17.6254	0.00803431	9.52344	0.351721	0.726905	16.1285	184.641	19.6217	0.424045	243.904	85.8776	7.54608	0.0928171	90.8833	15.4849	92.7636	5.47891	230.288	318.526	28.0286	12.0072	181.001	20.5648	27.8336	255.016	1.55401	14.5074	0.749974	6.00695	16.3225	1354.25	1.67804	0.187647	21.3614	0.531005	13.1337	1.2466	193.653	403.077	9.19513	73.5932	17.7958	45.3294	185.584	7.01087	302.684
TCGA-DK-A3X2	0.0214931	0.00967517	67.1176	15.8317	0.0100892	23.3956	57.8873	11.3946	64.3128	40.1523	12.3428	1.81711	335.096	97.2499	2.23766	0.0674333	115.08	16.6869	143.468	2.95787	2312.59	95.7785	148.214	10.4703	0.211431	18.104	73.0873	50.3505	0.260576	11.1582	0.990483	3.80394	3.35725	14.3281	125.694	0.0164516	27.824	0.064206	8.31675	0.333219	1.76172	35.0912	13.1419	33.1129	8.15687	56.3615	313.63	7.56771	67.8363
TCGA-GV-A3QF	0.980851	0.0536092	8.92706	8.94575	0.0219391	7.65829	0.307659	0.800274	16.9564	208.446	16.7446	1.13572	195.608	82.544	4.27967	0.176262	75.7968	14.3211	59.4299	9.90402	31.7405	500.816	8.29009	12.3023	230.944	18.9528	27.499	69.9681	0.669719	11.3075	0.794453	5.26394	16.1849	645.326	0.978734	0.120243	19.9335	0.123392	5.81505	1.24911	153.985	94.4337	11.6373	99.5384	17.4775	32.7282	149.75	4.83121	370.133
TCGA-GD-A3OQ	0.146642	0.0261547	137.516	7.62759	0.00915623	27.4117	6.5732	1.81978	8.00627	84.0924	17.599	2.81507	131.266	87.6502	8.74113	0.0832179	78.0235	10.9305	51.5384	7.8061	19.0723	77.0888	9.89643	15.2776	7.15324	16.6058	15.3478	44.3221	0.169556	5.85298	0.83555	2.035	4.42105	543.427	12.7086	0.0618264	16.6088	0.0734699	5.83699	1.28646	41.0279	62.526	6.29359	34.1611	19.1881	49.1387	77.2424	21.9887	69.9349
TCGA-DK-A1AA	0.0755502	0.00717266	44.3499	1.23078	0.00460968	24.09	31.3662	4.50471	48.5864	85.6494	21.7331	1.10121	179.942	88.7317	3.62081	0.0388931	83.6113	13.9086	101.834	4.24429	36.0411	75.6702	46.7349	25.1745	3.4963	19.8503	17.2226	15.2354	0.071029	4.13137	0.894078	0.457217	3.02423	135.458	4.66879	0.0348897	25.2836	0.0786391	14.2416	0.974573	15.5807	35.0625	5.10143	71.4561	19.4631	58.955	177.839	14.0689	59.3623
TCGA-E7-A8O8	0.880223	0.01602	8.62499	1.00207	0.00222122	2.99282	0.046366	0.153099	1.72591	172.562	11.0275	0.153297	143.235	75.9411	5.34233	0.122668	25.1467	15.5625	57.1029	1.42912	0.36471	82.2365	3.77904	22.1012	150.591	18.3937	13.8273	32.5277	0.450397	18.1301	0.691927	1.7157	11.3149	4250.64	0.598575	0.0432973	11.4318	0.3417	1.26211	0.870179	275.768	113.66	4.78712	30.0176	16.7309	39.4681	54.7705	5.7359	323.243
TCGA-DK-A3IM	0.0100795	0.00318157	1.6103	2.83665	0.00222565	0.842358	141.658	8.25985	124.672	22.1945	13.4692	0.497683	187.059	77.3325	0.195107	0.0136938	83.3504	15.7122	166.139	1.99084	393.129	35.4296	265.808	17.3759	0.0144076	23.9378	20.732	35.0651	0.354977	1.72746	0.940252	0.171453	1.00281	11.5101	2.05804	0.00345601	19.2368	0.188882	12.9328	0.470171	1.02167	4.5896	5.29386	39.2558	9.32396	67.7306	45.3199	0.585602	14.3554
TCGA-4Z-AA7S	0.0729727	0.0199195	59.8899	5.65282	0.0173616	39.1018	45.6078	10.7419	28.7637	51.5845	22.4996	1.50475	246.829	124.343	2.9634	0.102289	101.094	15.195	71.8453	4.60448	113.142	114.968	89.5948	25.1905	8.04022	22.5658	13.4402	18.6129	0.0677457	5.77208	0.898842	4.24729	5.93759	90.2702	35.4911	0.0550572	32.9566	0.0552301	8.79219	1.23753	11.3519	15.4046	18.3756	51.5195	29.2628	57.656	100.511	15.9695	73.8908
TCGA-UY-A78O	0.339841	0.100388	120.559	12.1551	0.00803919	35.8658	16.9534	2.57702	18.801	148.771	21.9552	2.65253	226.046	88.8166	7.63708	0.065347	273.23	13.8081	75.4205	6.70086	186.152	108.942	50.3868	35.0601	13.2955	21.9242	17.8334	26.2878	0.0884732	1.77025	0.761452	2.67532	4.90235	284.961	2.63245	0.0722492	69.8958	0.107787	10.0849	1.09112	38.0316	42.2312	6.98241	77.145	30.1162	54.0354	105.763	17.2899	407.313
TCGA-GV-A6ZA	0.0547263	0.0201988	12.934	2.15087	0.00838173	26.8313	4.99746	8.80714	29.5471	51.2693	19.2461	0.784249	220.573	91.7226	7.70023	0.0754323	88.9579	17.4543	99.7875	4.11675	51.8513	142.408	60.7349	21.2182	12.1592	21.9453	28.0945	18.2169	0.1464	7.46297	0.797469	1.57004	3.64147	38.112	11.3827	0.0395401	22.9328	0.0316356	10.7242	1.06918	7.0954	24.5975	12.9823	36.9621	16.2107	43.5264	91.0318	13.6252	58.4255
TCGA-GV-A3JW	0.235223	0.0276669	44.1805	7.06694	0.0126623	6.69157	0.912823	1.2768	6.63018	73.8269	17.9549	1.89027	196.932	92.5736	1.74734	0.149533	116.937	15.4356	63.8117	5.70917	73.0423	98.3299	23.9646	16.4899	44.6443	21.7373	11.1412	45.6954	0.197436	9.60338	0.86032	2.29514	5.5212	275.758	13.764	0.0512641	18.1006	0.0439622	5.85483	1.01339	28.6123	50.7347	18.7764	28.981	18.6285	45.6703	56.648	7.08946	109.995
TCGA-BT-A3PH	0.722546	0.033781	108.831	31.4914	0.020607	17.0625	79.9849	10.1853	88.2491	159.083	32.9476	4.37189	252.241	55.2441	6.46387	0.22649	296.959	16.5389	83.9426	16.4402	659.997	197.154	108.735	22.6067	22.9168	26.0491	53.5829	59.8193	0.327868	9.92373	0.880541	2.28594	12.3987	145.053	51.7257	0.14064	101.742	0.127914	31.2913	2.85518	65.977	108.739	11.5539	78.9753	57.7819	53.8809	384.001	8.10389	356.853
TCGA-CF-A1HR	1.23944	0.110043	117.595	14.1767	0.0231205	18.3751	1.0801	1.08531	29.1953	420.436	36.331	1.47792	233.711	110.429	6.99569	0.6406	161.302	20.8028	76.2506	8.45953	55.6911	216.829	17.1788	29.7941	157.625	24.7012	22.6948	97.8637	1.08114	10.6681	0.919763	4.78999	28.5084	1730.26	9.90901	0.57888	42.6186	0.332355	8.36335	3.44863	210.799	276.96	11.632	106.023	49.1072	48.1881	198.649	13.8014	521.12
TCGA-G2-A3IE	1.35232	0.0357098	166.221	12.4562	0.00581123	15.8077	0.432293	0.753725	2.45995	164.882	26.021	0.396116	209.391	97.532	5.35521	0.129056	55.9073	17.4668	58.8176	2.34362	78.2586	173.845	4.70436	28.9624	155.424	21.2749	10.6891	43.948	0.347821	6.61531	0.888594	3.15197	10.1543	574.122	2.20332	0.0866166	28.8767	0.287759	3.9035	1.86472	151.411	113.483	4.05602	44.8351	35.3638	49.1946	57.5307	13.2985	360.15
TCGA-CF-A8HY	0.016801	0.00274665	9.57316	1.87657	0.00292105	76.743	1098.09	58.8951	127.343	64.2433	18.6219	0.823685	241.716	107.742	5.25976	0.0151603	159.368	15.1346	174.87	9.14218	114.93	62.1073	350.689	26.0395	0.099689	20.534	22.5533	4.26573	0.0479824	1.10536	0.650089	0.201839	1.53315	6.02656	2.57625	0.0142166	19.5956	0.0649277	30.654	1.24901	1.37947	6.57785	5.09479	232.114	17.8856	36.2185	195.592	36.0773	42.1652
TCGA-CF-A47X	0.878985	0.0149685	5.19713	0.272339	0.00296374	0.609987	0.00277828	0.0700714	0.626886	186.958	13.5743	0.0545332	132.522	117.904	2.52222	0.225465	33.145	20.9912	44.7564	0.657087	0.013299	76.5904	0.400815	22.2486	631.768	21.3298	11.3818	37.5799	0.612759	24.2726	0.873008	1.57454	37.0908	4395	0.435404	0.0603186	6.11957	0.200841	0.475066	2.36029	465.358	106.535	4.46308	21.9129	24.4774	39.6099	58.2988	3.41673	281.603
TCGA-ZF-AA4U	0.0447507	0.00896025	20.1385	3.2787	0.0100609	32.6078	38.3828	13.7561	64.6601	107.111	20.5355	0.741538	217.069	85.6378	4.16414	0.0345409	145.318	14.8481	108.772	5.81366	222.55	105.56	87.124	19.6735	3.57636	23.0065	30.8406	17.9378	0.101013	5.7368	0.840916	0.491368	2.68673	38.8565	13.8447	0.0447295	24.9504	0.0498133	23.3719	0.96965	8.29234	27.2532	9.2138	72.9262	18.1172	61.9032	100.838	11.841	40.8078
TCGA-CF-A3MG	0.149212	0.0830672	304.834	46.0093	0.0601911	64.2591	164.557	43.91	114.303	157.183	40.8682	3.57929	323.031	84.8933	7.96646	0.218782	348.061	15.8962	97.7018	21.7465	1111.5	306.399	120.198	27.1491	10.7457	25.4609	31.3273	37.8598	0.160619	7.20001	1.05966	2.15884	6.71268	61.9898	48.2623	0.2713	71.816	0.107488	42.2193	1.78214	20.8184	58.6522	15.2305	124.829	45.3079	73.0463	453.338	18.5166	243.148
TCGA-DK-A3IL	0.689965	0.0254276	12.5538	6.0038	0.00754831	4.56683	0.163446	0.400059	5.52633	134.005	15.2144	0.542052	219.345	86.1758	5.02144	0.21747	28.3583	15.7866	55.9582	5.78306	15.0335	219.614	7.66755	12.6422	347.751	19.5539	19.5158	70.61	0.477635	25.251	0.830601	3.48226	11.8184	2374.13	2.44089	0.0903947	24.4106	0.178964	3.78756	1.82177	189.11	192.129	11.1532	25.0194	20.6559	36.734	119.931	7.01917	267.085
TCGA-E7-A7PW	0.313744	0.0127031	7.98459	3.48958	0.0118199	8.33947	0.118838	0.621571	8.95531	203.907	17.3475	0.38375	213.22	128.411	3.64434	0.20603	74.3239	18.7119	70.7856	3.59043	11.0931	133.378	32.1561	16.3394	138.286	20.5913	21.3416	60.5445	0.612154	19.3505	0.781876	2.01215	8.04522	332.578	3.48142	0.129	12.6046	0.234978	4.4676	1.28673	49.4322	107.227	20.1187	61.7965	16.919	36.9799	60.4946	9.28465	90.0524
TCGA-CF-A5UA	0.14002	0.0106593	196.129	23.2734	0.0141499	185.137	1136.63	236.529	107.675	111.702	36.575	2.75206	343.772	108.807	24.8003	0.0601172	180.687	16.6924	173.623	26.5212	917.516	123.551	629.204	53.7242	0.655567	27.0995	26.1209	6.84566	0.0429619	2.60244	0.720291	1.8233	2.26936	40.2777	24.8528	0.037597	53.6705	0.0601126	66.5087	1.4693	10.3671	29.0062	7.07932	95.7007	26.1074	60.2398	674.305	66.61	100.781
TCGA-FJ-A3Z9	0.605562	0.0115783	15.8177	1.00499	0.0053569	6.61137	0.350787	0.432338	8.75673	121.814	15.7199	0.234823	175.829	99.3612	4.44953	0.12159	52.5574	16.6427	67.2864	2.08396	5.44865	141.27	12.6331	20.6294	98.013	21.5088	28.4226	21.8251	0.446401	28.4181	0.898643	0.654711	9.79834	724.858	2.40201	0.066168	15.6766	0.265837	3.32949	1.14116	133.315	82.9908	7.91432	44.2979	21.7387	47.2588	104.425	6.99245	170.033
TCGA-LT-A8JT	0.0939946	0.00503575	15.5541	0.230111	0.00263406	7.11386	1.67891	0.819805	6.0174	60.5527	14.0639	0.362934	157.55	97.866	3.79318	0.0534849	34.0789	15.1989	70.6144	1.71043	2.72052	60.2999	3.82356	22.3835	13.1022	19.3441	8.69897	10.7252	0.0866294	4.98548	0.819635	0.886075	4.17968	394.584	2.41915	0.0198313	14.2927	0.061481	3.21132	0.982293	31.2964	22.2259	3.35931	22.5444	18.4327	42.9717	82.9086	11.365	104.289
TCGA-DK-A3IV	0.0585903	0.547265	78.271	11.729	0.0712988	24.7857	0.536113	7.84938	23.4388	56.7916	21.0572	2.97571	233.357	95.7874	9.24552	0.693928	126.568	17.9087	71.4882	7.63771	454.735	338.313	43.453	11.9882	40.5033	23.3216	19.9106	152.245	0.347491	8.89419	1.08566	3.97591	9.57043	157.887	17.8212	0.199198	22.5283	0.134727	19.6735	3.84411	9.75629	43.9353	21.7797	29.9285	14.2179	35.1255	90.8141	16.4046	95.7638
TCGA-ZF-AA4W	0.0141669	0.00336262	7.7484	1.02817	0.00153735	8.40586	53.7259	7.96725	76.5376	49.6219	22.6345	0.179498	176.88	57.3744	1.29017	0.0128982	39.7399	12.9994	202.235	3.82325	369.867	32.7242	251.841	23.6685	0.0674078	22.867	11.7415	18.2698	0.123158	1.60532	0.803287	0.136196	0.807898	5.55274	0.459829	0.0041224	9.26091	0.113156	26.0912	0.738928	1.37409	18.363	5.70707	38.2933	15.352	47.9101	58.0332	5.00463	18.061
TCGA-BT-A42E	0.0722242	0.0178448	2.89002	1.38587	0.00432356	4.81983	0.293418	0.61764	11.714	67.5148	19.0643	0.251202	151.235	82.2994	3.07252	0.0335691	31.9898	17.254	98.3053	3.47936	6.23261	71.0145	19.3317	20.4306	25.1017	22.3543	17.6965	85.0757	0.578898	7.672	0.864109	1.01983	2.95525	235.275	0.233607	0.0396922	13.4006	0.204257	4.05148	1.61152	20.8688	28.5189	10.675	54.0515	21.0796	52.7361	57.3912	5.04238	96.3959
TCGA-CF-A9FM	0.0208988	0.00691401	28.4947	1.11453	0.00532259	13.3642	37.0486	7.91918	41.6524	61.9169	23.0185	2.00637	184.294	99.762	2.05972	0.0799163	63.5886	15.5704	94.7557	4.81174	44.5055	63.9622	45.861	27.2694	2.33629	21.9997	17.9496	9.67764	0.0573897	3.67467	0.947089	0.668329	3.30938	38.049	6.93459	0.0288723	28.1286	0.0391115	12.5511	2.31281	3.3032	9.4204	6.3487	38.6781	25.6773	48.2911	123.521	8.16327	40.1965
TCGA-ZF-A9RD	0.00852028	0.0169264	7.01721	31.2087	0.0132611	10.6826	196.784	785.524	447.075	28.3017	22.4693	2.71883	199.509	43.7388	0.996268	0.0157717	259.273	12.6197	179.012	24.7399	1046.41	51.8168	1212.33	18.2176	0.00321997	24.7444	53.1173	76.2854	0.81621	1.28325	0.945177	0.407374	1.15991	8.87088	9.95017	0.033856	52.1216	0.164133	58.898	1.77618	0.666877	10.7423	9.27765	121.357	18.3969	46.5818	83.1809	1.68758	11.3173
TCGA-4Z-AA7Y	0.100521	0.0233044	51.5328	19.0591	0.0194947	55.4983	122.526	228.33	99.3265	95.7642	28.8606	5.41893	257.489	55.6215	7.85976	0.065879	252.672	12.4685	96.7711	29.1034	603.903	345.123	59.2093	23.4896	3.55241	21.3958	29.4777	24.3184	0.119771	7.6431	0.993044	1.41813	5.86161	24.6032	23.7668	0.0871539	43.5604	0.0591185	39.4218	1.89837	22.2057	37.6828	12.5339	116.816	23.0983	73.8312	780.248	14.2538	72.7148
TCGA-XF-AAMZ	0.0228391	0.0119104	45.7711	2.34134	0.0099545	78.2643	14.9782	10.9508	30.5888	53.1758	20.195	0.739621	296.283	150.034	7.95309	0.0706332	168.436	16.6899	110.305	2.55584	348.07	108.578	71.5239	25.4937	2.08642	22.9709	11.0486	13.4328	0.0475819	2.65949	0.905004	1.07909	2.6988	34.7871	23.967	0.0242435	29.883	0.0489337	11.5013	1.00458	2.17393	14.6773	10.0701	59.9732	18.4558	53.9351	33.9159	39.3178	57.0471
TCGA-UY-A78M	0.0630089	0.0102426	37.7807	5.64776	0.00611853	29.9045	105.326	7.40777	48.1125	63.0842	17.4193	0.768465	235.239	66.0275	3.51091	0.0158581	117.726	12.6857	102.858	7.94233	227.655	92.674	219.25	18.3088	4.34589	22.1085	15.9915	9.52712	0.0593713	2.11562	0.744966	1.01582	2.09619	30.1659	5.9473	0.0223992	23.8287	0.053914	20.3826	1.10423	7.10616	21.7745	7.21503	93.507	20.74	42.1597	89.9138	13.0035	52.1971
TCGA-LT-A5Z6	0.36304	0.0948865	118.554	13.0866	0.0244844	11.2844	0.115008	2.21528	8.95972	102.556	15.5112	1.77281	174.78	79.2771	4.80557	0.482689	97.9304	14.1818	68.1353	4.16964	89.5312	96.2606	38.6715	12.4825	33.6037	16.9775	13.1123	78.7646	0.499114	5.90257	0.806377	5.58966	8.65276	1057.66	30.915	0.314754	28.104	0.136883	4.71215	0.965068	49.8932	80.8866	17.0879	30.5712	12.4076	24.9953	46.839	6.00635	187.168
TCGA-BT-A20P	0.26829	0.0583745	91.8702	12.1399	0.0250126	60.1076	6.17875	6.04109	60.2293	510.583	36.7165	1.10926	312.284	182.637	13.026	0.147621	213.845	23.3743	143.034	9.44892	206.704	363.801	68.2449	58.4392	28.5495	24.925	27.7524	32.5857	0.250359	5.17059	0.952308	2.32248	11.6821	216.276	3.0025	0.492765	36.6625	0.273402	21.445	2.69217	58.3953	107.794	7.82036	237.696	27.8984	70.1511	241.162	29.044	255.438
TCGA-ZF-A9RM	0.0823278	0.0126897	114.554	7.55915	0.0105028	20.7037	15.0015	7.79372	24.0973	35.9602	19.4408	4.66199	227.649	93.0128	4.10373	0.379328	119.582	15.4821	67.5552	3.68635	953.658	128.736	60.409	12.1403	9.73762	20.8517	19.2487	38.6807	0.124807	6.73134	0.993683	6.4003	4.9825	54.8821	65.0763	0.0226339	24.6414	0.0479299	10.7024	0.747961	9.73624	47.6706	15.0974	17.4662	15.9488	43.4688	102.321	11.2678	102.535
TCGA-CF-A1HS	0.0221203	0.00615053	1.34892	5.18	0.00438666	6.22521	7.09141	6.13573	63.8432	49.9045	14.0335	0.212985	191.423	59.4395	0.978929	0.0128816	29.3027	13.0717	123.645	2.6762	87.8517	73.5559	129.357	13.0251	0.858203	22.5923	9.90848	66.4191	0.291968	2.60284	0.910657	0.670437	1.59021	33.9011	2.9246	0.00850502	15.1283	0.172168	10.1853	0.842033	4.07117	16.6754	7.57546	59.1478	10.3939	57.4798	29.0808	3.73983	23.4872
TCGA-GD-A3OS	0.0337153	0.0304782	28.499	12.0034	0.0109952	175.24	46.582	11.7956	49.0923	24.0008	19.2487	0.496713	263.96	89.2471	32.985	0.00361028	79.5856	10.2203	131.062	13.0241	671.48	89.9551	29.2405	22.1171	0.624709	19.2989	19.0785	57.5798	0.0416268	1.05143	0.703266	8.43299	2.26815	31.9717	1.81424	0.0573501	27.1633	0.0318209	29.3489	0.910752	2.32426	60.5065	3.55602	63.8594	10.4699	95.6069	29.9202	84.4977	24.8383
TCGA-FJ-A3ZE	0.455767	0.012206	44.0356	1.86314	0.00759321	15.3222	40.707	2.98453	18.8754	79.1802	13.0101	0.623914	160.584	86.5755	4.68418	0.125744	166.7	14.4098	54.4324	4.48176	191.055	115.693	52.6086	20.9344	28.3701	23.3383	44.3556	57.4904	0.407289	14.2198	0.820454	2.90343	6.20757	401.725	5.947	0.0576594	19.837	0.0694276	11.3722	0.651869	49.2957	42.9058	19.3391	34.7372	13.9388	58.4214	96.2891	8.32178	88.3368
TCGA-4Z-AA82	0.0296378	0.0916415	14.5808	4.37472	0.0195457	27.8442	22.2995	7.05131	120.525	50.0856	32.4835	1.20467	216.02	88.7992	6.24941	0.038751	109.263	15.7648	135.823	14.3209	195.797	196.381	195.769	18.4246	5.72763	21.7879	91.8815	64.8339	0.280605	8.15354	1.00978	0.75424	4.13176	59.7066	6.17313	0.125584	30.1495	0.134237	23.4686	1.75186	4.90198	30.9237	10.2213	144.444	27.0025	56.521	217.267	11.403	75.6251
TCGA-FD-A43X	0.0560483	0.0102838	26.7379	1.96599	0.00544233	15.6456	17.8208	2.2901	36.5465	120.342	19.807	0.59134	268.81	139.217	2.41879	0.0605965	77.5778	20.1783	93.939	4.05309	42.0322	88.8621	44.9156	27.5702	7.29905	25.3656	10.6623	9.28927	0.0951981	3.10188	0.90619	0.430133	4.05757	116.108	3.02971	0.0273986	25.9556	0.0570194	11.2554	1.85889	13.9228	39.1719	5.36691	77.0455	21.2388	47.1217	65.2029	17.8785	91.1919
TCGA-DK-A6B6	0.289558	0.0536711	81.7192	5.9994	0.0155726	6.03354	0.0783898	0.84687	9.75868	112.945	22.3947	0.830016	135.447	75.45	3.45916	0.405336	47.8129	14.5574	51.9055	2.99802	14.6747	96.2297	11.4163	19.1905	47.5664	19.4127	12.055	74.4581	0.550737	12.5218	0.836794	2.78005	7.74258	979.584	14.6697	0.25782	18.0363	0.131586	2.4709	1.62842	52.6184	88.9773	15.5565	37.4827	27.0473	34.8911	55.0433	6.93546	222.796
TCGA-CF-A3MI	4.27503	0.0288038	6.2918	1.56858	0.00358979	1.06525	0.00306727	0.0956796	0.996323	232.11	12.0462	0.138298	133.035	64.3081	5.04271	0.481674	16.1382	15.5734	38.9327	1.76414	0.0326371	133.887	1.86827	16.9241	1195.51	18.1239	26.7788	90.8442	3.14846	119.079	0.754387	2.28814	23.0951	19362.9	0.676392	0.224864	12.8355	0.636614	0.916908	1.50787	1291.31	411.739	10.3072	27.9908	21.5443	38.951	74.2864	3.39161	377.323
TCGA-E7-A7XN	0.00236684	0.00332551	2.00938	0.483547	0.00435154	16.2745	28.1495	75.6291	111.642	12.7826	22.9571	0.309355	164.669	45.406	1.77335	0.0121899	23.6099	14.0504	168.33	4.18533	67.4299	25.6578	129.59	13.3718	0.0268059	23.7691	19.4862	12.3521	0.097653	1.38102	0.947171	0.0764868	0.603033	0.885789	6.3251	0.0203788	8.58383	0.0464276	20.0424	2.66068	0.169433	2.82066	5.65814	46.3506	16.6378	36.4388	37.3424	5.92744	2.90486
TCGA-4Z-AA89	0.021011	0.00710262	36.2038	1.60864	0.00508513	40.2708	83.8465	19.3107	59.4376	56.7553	21.7487	1.14622	209.214	96.9066	3.92594	0.0295114	109.099	14.8731	113.282	5.25725	76.0931	61.6561	95.3879	25.2073	0.500956	22.8012	17.6606	7.16693	0.0575225	2.47585	0.920126	0.620573	1.95143	37.6441	8.39158	0.0206915	22.2584	0.0332356	19.837	1.231	3.07851	9.43815	7.8781	55.066	21.5807	53.2214	91.7901	15.9253	34.1155
TCGA-FJ-A871	0.0047835	0.00218038	9.26618	0.390681	0.00327235	528.659	297.987	53.601	175.879	20.9987	18.3768	0.430078	285.035	119.459	37.5444	0.00286972	59.4297	10.1335	378.324	10.1214	450.714	38.5254	501.375	34.722	0.010637	16.4268	31.1311	1.72526	0.0122897	0.8256	0.523465	0.145553	0.543947	1.17845	0.627244	0.0104201	8.11878	0.0435791	60.4877	0.242783	0.390804	3.18455	4.77516	243.394	6.06054	61.9725	19.4898	219.384	2.32414
TCGA-G2-A2EJ	0.308739	0.167747	38.9654	233.396	0.2152	3.37009	38.3872	410.707	812.045	37.6708	19.5029	6.87285	183.202	30.892	1.27033	0.0215476	304.078	11.0082	202.562	87.5806	1503.08	48.5989	1964.26	13.2154	0.00213575	24.1477	72.1385	352.937	46.3798	1.59132	1.18425	0.431247	1.26466	20.1861	23.9935	0.491474	85.7446	0.220607	59.2966	1.50891	46.4323	187.834	9.72795	135.399	14.3257	51.0598	48.429	1.12179	27.8466
TCGA-GV-A40G	0.717862	0.00863824	5.51613	7.37293	0.00676119	8.96344	1.70952	0.450024	6.46232	175.553	8.95861	0.472822	232.448	107.263	9.6139	0.354426	60.3704	18.1367	58.0191	2.30719	57.6424	148.734	10.3292	11.9717	274.606	20.4903	13.1288	62.8606	1.24641	18.9829	0.748015	4.64935	24.4727	310.451	15.3558	0.0339741	11.3365	0.108269	3.384	1.54755	200.746	118.225	18.152	27.4229	11.3075	23.2802	101.892	14.7421	356.254
TCGA-CF-A47W	0.0669168	0.00809708	81.8382	3.38435	0.00481909	46.1371	65.4038	7.86453	41.6234	100.676	23.4967	1.0631	211.044	108.83	4.46932	0.0464737	90.6445	16.4159	129.616	5.86235	95.9684	69.7366	190.443	34.7155	1.20637	22.9297	22.2704	8.77292	0.0786363	3.96444	0.793029	1.12707	2.28056	110.74	3.91283	0.0392781	32.9349	0.0774948	13.9773	1.36366	7.20989	20.002	8.55975	73.9283	26.2597	48.5537	99.2215	19.841	81.4452
TCGA-GC-A3RC	0.00973019	0.0213712	17.7673	19.8552	0.00767005	3.52945	11.6188	223.23	210.208	28.2541	18.945	1.11697	205.127	31.5386	0.926803	0.0120215	34.6731	8.10176	139.277	12.8106	842.759	52.889	183.507	7.14245	0.0310909	20.1836	26.891	109.234	0.340548	3.11284	0.910086	0.227225	0.557874	17.1429	1.71908	0.0217892	21.3763	0.111386	43.042	0.737706	0.895119	18.4613	5.19822	39.9916	8.45642	44.7392	77.5678	1.83044	16.6861
TCGA-PQ-A6FN	0.0207318	0.00645323	13.1257	12.2788	0.00476775	46.6799	178.84	76.8323	131.952	63.7743	31.3154	0.761638	302.561	75.0218	2.56162	0.00505892	171.146	13.1366	310.865	24.9226	1635.28	67.7457	643.799	26.4936	0.0823924	23.4945	19.0993	25.0679	0.0623313	0.485751	0.798318	0.345446	1.27622	2.96698	0.551935	0.00871453	37.1296	0.0535276	58.7764	0.790955	1.00242	19.5366	4.66821	167.901	22.7541	52.6945	62.8475	11.4303	23.3769
TCGA-2F-A9KQ	0.466801	0.0193021	40.4863	3.39279	0.00654193	11.8016	0.223003	0.820081	12.8097	97.2016	17.8013	1.19969	172.761	87.2313	9.98402	0.336075	44.8822	14.4417	54.907	4.1243	0.72401	119.112	7.11843	16.5577	101.423	17.1239	27.0555	32.8921	0.395691	26.8482	0.868651	3.13223	10.965	744.076	6.92593	0.100755	24.469	0.162777	2.65946	1.09027	74.9898	42.0397	11.5683	47.8393	21.149	37.9457	131.926	7.55279	246.064
TCGA-CF-A8HX	10.9909	0.0116657	5.17163	0.388165	0.00214556	0.305807	0.000151687	0.0334344	0.144076	328.91	7.65806	0.0496398	129.278	89.0986	3.80705	0.705717	8.83997	18.5993	38.3264	0.762448	2.23836e-05	70.8232	0.0773469	14.4528	1955.95	17.3423	13.8532	73.1424	3.61563	81.5144	0.777377	2.17509	47.0377	48657.2	0.263706	0.121974	4.16028	0.748791	0.292226	1.47462	4043.16	432.895	6.20806	14.3577	14.1575	28.3225	51.7823	3.78519	426.562
TCGA-G2-AA3D	0.190017	0.00670611	15.7702	1.31004	0.00367515	5.26668	0.410292	0.989734	12.0629	133.805	19.189	0.296751	185.525	85.2366	2.47559	0.17316	41.2515	16.6016	72.847	2.11314	9.99655	83.2554	14.2937	15.5843	40.3472	21.6592	21.2259	24.3481	0.23424	6.92317	0.882778	1.27772	8.67021	351.282	3.88247	0.0394406	13.444	0.0902587	3.78085	2.26751	52.2674	69.8992	8.59954	27.6434	20.6258	31.4993	107.746	7.02677	144.04
TCGA-XF-A8HC	1.10043	0.0284219	2.32721	6.53169	0.00935627	2.5313	0.133454	0.188089	2.45521	216.441	9.35826	0.570658	208.481	90.9077	7.64525	0.905368	33.9601	17.8976	48.5229	2.89857	1.82924	171.394	2.49163	15.2587	720.383	20.8813	14.0925	71.8279	1.01893	35.1784	0.732937	8.61428	51.6276	2101.77	5.86083	0.047191	7.53951	0.217121	2.39938	1.46859	469.169	103.532	13.3604	21.8496	16.8784	29.1478	112.985	8.44901	349.29
TCGA-CF-A47Y	7.20697	0.00685193	1.88698	0.141155	0.00109364	0.105154	0.000233426	0.0273942	0.0852523	335.19	8.49986	0.0300085	112.245	80.2513	2.01787	0.344744	7.08648	18.2896	41.1763	0.648794	0	68.8132	0.0584618	17.6819	2245.57	17.7722	13.7499	46.6458	2.5479	75.7065	0.741748	1.58161	49.4908	34493.3	0.0217881	0.0457598	4.76666	0.60282	0.249223	1.80131	5164.72	338.968	3.84859	15.1402	16.7205	30.6409	66.3105	2.23289	513.449
TCGA-CF-A5U8	0.13398	0.0091806	32.9864	2.27995	0.00513298	18.3291	3.46509	1.56943	10.1385	154.657	13.2728	0.601669	185.209	68.6715	5.545	0.105764	61.4456	13.9885	78.4392	2.73991	21.2348	90.7624	35.455	23.3494	27.1175	19.8822	12.6794	13.1975	0.215219	7.8587	0.774206	1.03223	4.27652	444.977	4.40525	0.0498751	30.9711	0.0982046	5.87822	1.12939	51.9648	83.852	6.74041	38.3932	14.6406	47.3796	102.656	17.1731	110.512
TCGA-E7-A5KF	0.00956486	0.00820337	24.2191	0.88513	0.0122279	43.1418	246.955	61.964	84.4806	28.0382	21.5506	3.06211	228.512	163.777	1.95964	0.0497294	137.938	18.5776	122.208	7.22434	86.4564	91.4158	87.2718	26.9832	1.44705	22.9719	16.2825	4.44849	0.0528285	3.18341	1.03183	0.487318	2.87946	7.63359	26.8968	0.0307805	33.8411	0.0385024	22.4804	1.67314	0.833162	5.08793	11.0351	53.6395	24.508	46.0166	118.704	20.4791	18.6165
TCGA-4Z-AA7W	0.00262715	0.0121538	1.2231	10.8331	0.00894734	36.1758	278.754	7053.16	267.455	37.5468	35.6981	1.96129	263.773	55.4157	1.04417	0.00851887	150.137	16.1073	161.106	43.6307	427.42	46.0683	966.262	17.0701	0.00494612	27.8455	21.8677	13.656	0.223172	0.352863	0.709536	0.269331	2.23543	1.11319	47.7495	0.00769656	37.3249	0.0694119	29.5342	6.58067	0.0996929	3.68722	7.03901	148.24	27.0303	35.6489	21.6049	9.44328	12.4941
TCGA-GU-AATO	0.0125812	0.08952	26.7285	20.3973	0.163649	96.3789	42.862	193.039	229.115	150.201	68.5831	3.63123	333.314	108.304	2.08744	0.0321141	314.17	15.9797	134.311	95.8383	947.552	121.335	837.787	22.5847	0.900565	25.7958	8.87625	86.9666	0.0857823	0.34646	0.759371	0.986591	6.85814	8.91243	14.142	0.304382	48.7414	0.0806469	79.1782	3.37689	0.837381	26.612	16.1605	495.504	47.0521	41.1503	46.2992	26.0943	31.0824
TCGA-ZF-A9R4	0.0335456	0.014186	22.3887	2.07627	0.00960213	24.0375	109.706	11.5529	70.4425	26.3965	20.7377	3.0133	177.905	101.791	6.29451	0.0464114	159.644	16.4426	77.5484	3.9083	159.245	179.492	67.7198	23.9642	3.96711	23.4521	17.2648	24.5265	0.0913174	2.87897	0.868227	2.09205	2.57094	38.0775	36.9672	0.0426253	26.5244	0.0561428	14.0769	0.80351	3.20525	8.46158	7.468	67.9489	23.943	55.9848	154.424	13.5298	65.914
TCGA-XF-AAN1	0.0381169	0.0135536	39.3407	2.38193	0.00799007	41.6866	31.4932	6.30514	37.4066	95.457	19.9157	0.919461	244.05	132.269	8.28043	0.0782856	81.1597	17.4164	111.89	4.78726	55.0187	90.4162	71.5639	30.7806	5.32462	21.7617	17.0431	11.4997	0.0985245	3.80952	0.85798	0.953591	3.35791	125.872	10.9715	0.0366961	31.4913	0.0757686	12.7199	0.782826	8.78794	20.7145	5.89234	68.332	16.3206	55.8209	101.494	32.1376	88.7348
TCGA-G2-AA3C	0.019512	0.00348184	4.22948	2.41696	0.00503916	428.424	39.7285	18.8902	55.6854	193.178	57.2597	0.13716	238.199	85.4265	27.46	0.000672402	273.262	9.46373	303.693	31.568	424.163	544.788	93.5682	43.6558	0.189671	22.7936	5.67498	4.15232	0.0230149	0.0999661	0.652755	0.0752966	3.96643	0.617576	1.82448e-05	0.0179588	6.79219	0.333514	147.026	2.26462	1.23091	10.4728	0.324757	1399.05	33.6851	44.8432	114.498	195.742	17.4108
TCGA-CU-A3QU	0.0967987	0.0944258	17.4791	37.3001	0.0565459	34.4144	7.15485	7.02638	40.5373	63.3076	17.9755	7.18416	264.784	66.7489	13.6347	0.253761	132.804	14.9776	71.1013	13.7102	444.29	292.577	68.8509	12.2865	18.2382	21.4694	12.8531	37.1699	0.252029	6.95879	0.799318	4.82383	9.39692	47.814	115.372	0.0560845	17.3141	0.088438	21.9227	1.7164	13.3906	32.0466	21.1453	47.8961	15.1649	35.0727	118.718	18.4377	88.1577
TCGA-PQ-A6FI	0.00225534	0.00555028	2.1712	1.67141	0.00368653	17.9875	167.106	181.208	304.345	23.1616	25.2515	0.350126	265.932	75.638	1.38721	0.00702828	100.568	15.0477	283.029	5.08677	722.918	51.2394	475.938	16.7894	0.016032	26.0492	25.8025	32.9782	0.106228	0.852652	1.08887	0.216838	0.624717	0.717537	6.37093	0.00689345	20.4498	0.103214	52.1054	0.529266	0.14755	4.80638	6.63886	51.0344	12.846	102.772	31.9411	5.92483	5.70596
TCGA-E7-A7DU	0.0856053	0.00680779	10.8876	1.51757	0.0048184	16.4829	5.62903	2.05995	22.7053	107.437	15.8716	0.361916	224.555	89.0258	4.82603	0.0705905	44.4759	16.424	78.3515	3.05148	42.0835	105.277	28.7298	19.3488	17.5042	23.3088	16.4421	11.9395	0.133107	8.61222	0.808525	0.594359	3.7207	178.222	3.58172	0.0302906	19.8412	0.0689182	8.33758	1.79366	25.5973	55.9457	7.04757	40.1732	19.9037	48.0047	134.596	14.5761	77.8983
TCGA-YC-A9TC	0.0150236	0.00127267	1.82013	0.0627948	0.000756314	25.4419	5.9996	1.64488	5.40842	19.8862	11.1711	0.195672	165.918	83.6611	2.42358	0.00852357	37.4103	14.9068	142.735	1.46575	6.51664	86.1413	24.7252	28.2447	0.435373	16.441	2.86149	1.33222	0.0207206	0.563206	0.691007	1.26054	2.03155	1.8495	0.626869	0.00184949	4.62527	0.0548578	4.29578	0.420399	1.28999	2.5152	1.06916	49.5127	7.19323	34.5602	190.703	16.2671	19.0974
TCGA-DK-A6B0	0.0217251	0.00494548	30.8723	0.797045	0.00342122	39.8286	78.9778	8.30109	45.047	56.8287	20.4212	0.868774	211.515	107.529	3.63256	0.025302	82.2262	16.8088	129.362	3.77113	96.5529	51.3086	121.075	35.1924	0.603174	23.1036	15.7537	7.33179	0.0455046	1.90283	0.848459	0.467719	1.94066	48.1939	3.63235	0.0177577	24.2421	0.0549776	13.2464	1.52235	2.88538	8.5766	4.31432	59.9788	20.2899	50.4893	104.616	17.832	38.4275
TCGA-E7-A519	0.0371919	0.00754221	65.7079	8.25418	0.00576544	85.9762	174.013	26.1172	67.7377	133.412	29.0978	1.68113	212.508	66.3949	4.5134	0.0212522	73.4262	13.1644	135.436	22.7325	198.056	60.0508	445.014	30.932	0.735938	23.9449	12.1621	5.31344	0.0486754	1.1043	0.69425	0.366592	1.2764	20.374	0.480872	0.0657099	33.7188	0.160609	33.8192	1.74039	4.61277	24.5283	7.09795	156.694	27.6282	43.9383	67.3322	46.8186	42.5742
TCGA-XF-AAML	0.0256627	0.0162877	5.27582	5.31529	0.0181414	8.98013	28.0373	50.8785	60.6255	24.2468	19.86	1.83923	233.224	71.6468	3.31095	0.0576992	131.039	20.8347	115.138	3.40648	374.245	74.3492	130.634	14.68	1.27485	29.1214	39.6824	23.3108	0.550318	5.25881	0.788292	1.42861	2.43085	4.99299	34.3148	0.0486702	14.5424	0.0561185	17.8886	4.32024	0.749377	8.52449	15.343	48.9096	15.9402	35.6875	79.9109	4.097	20.7057
TCGA-ZF-AA4X	0.153586	0.0777663	53.9798	13.1251	0.022449	5.26731	0.62639	2.13623	16.4968	84.9469	12.6984	1.65773	207.024	73.651	2.11143	0.412033	65.9857	13.7516	61.7074	4.49575	132.578	120.254	30.0421	9.6268	33.7704	18.5162	14.9306	76.9232	0.211679	7.67398	0.817073	5.76308	9.14267	230.221	20.2831	0.119358	20.6089	0.09841	8.48421	1.14142	24.7966	56.6248	19.8668	34.8431	11.5463	27.2239	88.4185	5.26809	113.987
TCGA-YF-AA3L	0.308114	0.0474458	206.061	34.0291	0.0200773	92.109	181.299	43.0632	99.1153	189.336	30.7081	6.0746	306.38	126.707	10.8669	0.162892	275.735	18.6017	116.382	48.8347	610.21	195.065	384.49	31.1182	5.43225	24.4321	37.7306	54.1922	0.251307	6.12399	0.763487	3.63812	3.89218	81.4075	22.8553	0.284238	67.3412	0.131329	24.8649	2.29192	18.4875	163.944	16.4393	126.464	32.0555	41.8435	179.227	29.6048	185.52
TCGA-E7-A678	0.0283405	0.00852806	85.1342	1.35895	0.00368444	61.6218	562.442	24.8992	62.393	71.6692	21.4192	1.49141	184.562	106.221	4.70923	0.0232431	150.17	16.3836	141.439	5.72158	147.868	57.5951	233.92	39.1802	0.268363	23.2606	17.1272	9.74647	0.0526364	1.5337	0.849065	0.84044	1.84773	86.2576	6.48604	0.025996	41.5701	0.0393078	20.3851	1.27337	3.4283	10.1173	4.98414	63.091	26.0599	58.988	163.924	21.3669	72.8183
TCGA-CF-A3MF	48.7868	0.0185304	2.52895	0.793813	0.00293079	0.0751621	2.00909e-05	0.0272364	0.0494314	289.848	7.83968	0.0589167	107.414	56.2156	4.84174	1.35439	3.51955	15.0866	26.4776	1.01765	0	129.599	0.0343895	11.7214	7295.21	16.0954	21.0503	138.138	12.3668	494.294	0.751853	3.69114	46.0435	197405	0.221666	0.29576	6.4495	1.03557	0.232931	1.30538	17178.7	848.587	10.6925	11.6688	14.814	27.7936	68.2666	2.04513	563.696
TCGA-CF-A47S	0.183995	0.0143605	18.3371	2.23341	0.004884	8.43556	1.16915	0.839765	13.8549	120.526	16.9722	0.506906	168.593	81.1761	4.02375	0.127966	39.0061	16.3668	80.2064	3.65248	9.76107	94.2454	17.1527	26.6343	41.5305	21.2522	23.7705	21.5061	0.235023	12.3942	0.810465	0.995472	7.93568	509.413	2.09432	0.0697573	22.3829	0.185406	5.34655	1.98818	55.6524	42.4269	6.43	41.8023	23.9634	37.6227	99.2479	8.41158	145.329
TCGA-ZF-A9R5	0.0106392	0.00480602	23.3289	0.0705068	0.00288578	30.3635	71.106	10.451	34.7345	29.0383	14.4682	0.545221	148.968	133.226	3.74313	0.0166617	82.4963	15.0558	118.117	2.13985	39.7008	38.2795	64.5204	30.2037	0.0762102	20.2119	8.05571	4.27165	0.0297867	0.841448	0.897945	0.438495	1.49619	29.7238	6.5591	0.0115666	12.5596	0.00818711	8.23883	0.591671	1.1002	2.051	3.32156	36.643	12.9382	50.4734	42.7384	21.8786	25.1396
TCGA-XF-A8HG	14.1497	0.225325	46.7744	4.65939	0.0145394	2.27619	0.0155503	0.153374	2.55475	343.744	16.1375	0.414419	141.8	94.1232	5.20059	0.711423	55.7484	16.7691	46.6041	2.57775	1.94739	161.584	3.25088	20.5049	534.096	19.3085	16.7031	111.98	5.3939	49.1356	0.874385	2.80671	18.0902	11183.8	3.448	0.670389	26.4271	0.428717	1.47854	1.08398	1720.73	410.895	14.7706	35.1965	24.9595	48.6504	74.8886	4.85402	691.541
TCGA-GU-A763	0.0169246	0.00498474	25.9999	0.996443	0.00231031	45.2474	510.536	15.8404	47.5735	59.6212	16.8048	0.662784	193.845	84.8436	5.47664	0.0127525	100.056	13.8547	168.496	4.46229	110.085	39.6145	145.869	40.0086	0.0975191	21.0278	11.1671	3.75728	0.0296236	1.13198	0.693988	0.844558	1.38269	51.7682	2.28698	0.0118686	21.9946	0.025346	19.2706	0.547227	2.36635	5.70625	3.07619	60.8781	20.8123	48.0031	116.998	26.8898	49.2158
[truncated: 149 more columns]

## Sheet: LAML
	Camptothecin_1003	Vinblastine_1004	Cisplatin_1005	Cytarabine_1006	Docetaxel_1007	Gefitinib_1010	0vitoclax_1011	Vorinostat_1012	Nilotinib_1013	Olaparib_1017	Axitinib_1021	AZD7762_1022	SB216763_1025	KU-55933_1030	Afatinib_1032	Staurosporine_1034	PLX-4720_1036	NU7441_1038	Doramapimod_1042	Wee1 Inhibitor_1046	Nutlin-3a (-)_1047	Mirin_1048	PD173074_1049	ZM447439_1050	Alisertib_1051	RO-3306_1052	MK-2206_1053	Palbociclib_1054	Dactolisib_1057	Pictilisib_1058	AZD8055_1059	PD0325901_1060	Obatoclax Mesylate_1068	5-Fluorouracil_1073	Dasatinib_1079	Paclitaxel_1080	Crizotinib_1083	Rapamycin_1084	Sorafenib_1085	BI-2536_1086	Irinotecan_1088	Oxaliplatin_1089	BMS-536924_1091	GSK1904529A_1093	Tozasertib_1096	PF-4708671_1129	PRIMA-1MET_1131	Erlotinib_1168	Niraparib_1177
TCGA-AB-2859	0.032166	0.00887608	46.0553	2.08473	0.00648504	23.4196	75.209	3.38619	29.391	58.1801	28.0514	1.95461	173.447	120.604	2.93528	0.0189437	72.9051	16.2257	143.54	4.36599	149.094	57.9349	48.3688	46.3193	1.64903	18.2386	6.47335	9.007	0.0405071	0.996824	0.837189	1.28181	2.71731	54.4078	1.73034	0.0242831	16.8879	0.0461283	21.7781	0.746135	5.45678	15.967	4.04061	44.3664	18.3424	38.66	69.7295	9.57215	58.7021
TCGA-AB-2814	0.174611	0.0129581	15.0065	1.13371	0.00487441	4.64354	1.34855	0.722028	9.89365	105.195	22.7301	0.655759	167.701	133.223	1.97635	0.0716955	40.2305	17.4046	116.242	3.30773	7.011	68.6468	18.9408	79.2968	22.5617	18.1983	9.18312	38.9142	0.210995	5.05596	0.845821	3.04356	4.80621	407.235	1.02129	0.035621	11.6393	0.132634	7.76024	0.202868	58.2265	39.7203	5.95279	19.4549	21.7154	48.6472	80.6218	7.4795	78.092
TCGA-AB-2909	0.0186401	0.00877077	15.3166	2.09862	0.010338	32.2068	14.9789	4.61779	30.9386	32.6107	17.4487	1.2352	217.949	100.781	6.78725	0.0515406	72.6321	14.083	138.938	3.7598	59.1531	83.8672	53.663	27.4326	1.16808	18.6211	48.782	37.1237	0.156075	7.22899	0.926235	0.795799	2.78117	78.6547	11.2106	0.0301226	16.5761	0.0682236	18.2277	0.564564	3.17866	14.379	13.9916	47.748	11.402	49.4733	28.5707	14.3944	25.9376
TCGA-AB-2949	0.0126607	0.0056163	15.719	0.917144	0.00388051	45.0693	255.937	10.5807	42.5288	22.2481	29.1503	1.16019	208.956	120.531	5.16368	0.0163619	124.166	16.8849	164.74	3.25045	255.519	50.4267	125.429	74.1684	0.170579	21.9953	17.8307	14.017	0.0612458	1.279	0.906789	1.22069	1.35337	18.6414	4.01507	0.00905296	20.3942	0.0402428	28.3488	0.250052	1.43794	4.90894	7.83286	33.8252	31.2691	71.5899	80.7126	16.687	16.9737
TCGA-AB-2929	0.00734352	0.00612761	34.046	0.398207	0.024917	93.0481	228.228	77.7536	43.2093	9.9063	34.2331	2.88183	276.385	174.316	3.74379	0.0170028	84.6123	14.9765	172.244	12.1651	307.029	76.6926	27.777	64.2666	0.227563	22.7599	4.61382	3.68139	0.0243925	0.847807	1.06703	2.28697	1.4643	2.5667	6.6234	0.0235991	25.9363	0.0200948	39.2236	1.22436	0.498231	2.26035	10.2459	32.5844	24.6686	48.6236	24.9059	27.1767	7.55239
TCGA-AB-2839	0.263268	0.0313717	64.8827	3.59105	0.0100126	12.9347	2.23473	0.954318	15.4659	134.64	29.0694	0.962596	210.331	134.502	4.382	0.0778711	82.6069	17.6051	130.832	4.7948	47.0951	100.085	38.473	59.7396	19.2339	18.6016	19.6146	52.7285	0.35883	8.53154	0.942901	2.29548	6.29564	805.772	2.66813	0.112687	18.1953	0.182181	9.36925	0.183089	56.5609	83.6057	10.7682	44.3987	23.6601	50.4244	80.1846	6.77289	112.025
TCGA-AB-2863	0.0837496	0.0323845	68.5549	5.23965	0.0138009	29.7893	7.67746	7.86238	25.2666	77.5878	35.0998	1.35365	208.898	93.5088	6.26942	0.0836869	145.021	12.865	124.124	4.47211	343.375	124.926	77.8153	37.701	4.5073	16.9035	27.7724	57.0547	0.1173	4.08306	0.976287	5.67414	3.3863	137.062	7.65337	0.0565131	23.8821	0.0998208	22.6684	0.0644184	12.9581	48.2993	10.0384	56.2217	18.1772	102.458	114.075	10.4571	71.9748
TCGA-AB-2853	0.151146	0.0115463	18.299	2.12208	0.00506732	8.00714	3.24416	0.991692	16.8117	110.298	29.7686	0.720963	172.506	119.208	3.25443	0.0526401	79.6915	16.8341	114.252	3.20643	35.7304	95.4286	34.7176	65.2554	15.7911	17.7958	22.5515	41.0008	0.198571	7.62913	0.843579	2.82952	6.14851	296.431	3.07028	0.0251381	17.6846	0.106597	7.85845	0.0766861	37.667	55.6956	8.38768	32.2663	22.6427	66.2116	137.419	5.52211	93.1604
TCGA-AB-2928	0.00445363	0.0053019	30.0073	0.371535	0.00884764	85.8813	245.379	35.6603	26.6177	10.8338	25.4912	3.293	279.295	229.553	4.02904	0.00905394	95.0064	17.6206	250.016	5.33518	283.66	43.3218	80.5951	37.2947	0.0413507	23.2839	15.0021	2.73423	0.0264793	0.528469	1.09022	0.570077	1.73473	3.71565	4.20913	0.0113043	22.4207	0.0201596	37.9133	0.470957	0.222703	2.28597	4.62381	30.2136	10.8563	90.7822	40.1819	27.561	6.12168
TCGA-AB-2865	0.0752828	0.0439661	55.0077	17.4171	0.0587887	55.3178	36.7393	35.2738	85.6964	38.5486	41.7381	3.77868	267.628	94.6747	11.4735	0.0576757	90.4596	18.7655	129.961	19.746	687.784	156.711	73.2571	46.4246	4.70207	28.0234	30.0468	78.7063	0.232133	3.1259	0.990506	2.29023	3.50024	35.2029	14.0659	0.154478	34.1385	0.142715	42.2531	2.11342	10.1773	32.367	14.0378	76.6874	42.3154	49.059	88.8193	23.0248	47.8985
TCGA-AB-2944	0.019798	0.00618263	22.3832	0.632676	0.00610957	27.6397	99.0579	3.65083	24.0291	27.14	33.344	1.59378	218.905	164.393	2.98469	0.0219141	103.494	19.3802	169.362	4.10308	81.2662	45.1145	30.665	107.853	0.804204	23.007	13.0667	8.90841	0.0474074	1.54268	0.948247	1.23581	2.10385	23.9734	1.15155	0.0226411	16.3328	0.0534047	20.899	0.476301	2.50762	6.4925	7.4531	35.002	35.0994	51.2655	60.3385	15.6976	19.1598
TCGA-AB-2885	0.0144665	0.0106418	50.7435	0.877391	0.0120604	33.5745	73.0047	13.8885	41.7672	19.198	33.8879	2.33555	316.72	164.35	2.50081	0.0285329	81.1714	15.0634	159.853	13.3925	435.585	135.209	24.3954	42.6358	0.440166	18.9455	6.15687	8.51242	0.0380937	1.39304	1.23017	5.43463	3.22807	44.0492	2.27683	0.0348247	38.17	0.0452017	28.3997	0.743922	0.867943	13.6445	5.89047	45.6628	17.0994	39.1586	59.5442	18.0173	20.7698
TCGA-AB-2936	0.0449117	0.00917113	48.4041	0.630857	0.0159479	16.8597	2.34929	8.60176	6.93686	40.2047	48.8052	0.769127	313.566	153.352	3.2226	0.127185	48.0752	15.3414	98.1847	4.44546	40.0772	168.737	8.11941	19.4948	5.19887	16.727	4.40256	6.59463	0.0676054	2.56642	1.10182	3.63052	2.7927	49.39	0.994694	0.0498426	22.8008	0.0507618	11.8261	4.47103	9.92233	26.2482	9.4569	26.3857	11.0739	51.4081	45.8552	6.24969	40.4403
TCGA-AB-2914	0.16386	0.0686135	59.9854	8.9313	0.0325337	34.8714	5.22101	6.21833	60.1411	94.5458	27.6053	1.5874	176.679	85.9378	7.28569	0.059656	133.244	13.5085	107.069	10.1864	189.772	196.954	136.004	32.1084	6.60819	19.9862	37.0931	75.406	0.376182	9.0818	0.91049	2.10392	4.2747	417.982	11.442	0.128099	31.3016	0.282016	26.7773	0.183484	24.272	55.6864	16.3948	95.6398	18.5453	80.5428	105.995	14.327	82.01
TCGA-AB-2918	0.0361941	0.0045048	4.23789	0.613635	0.00278831	5.58696	1.44689	0.801789	10.4482	46.1192	20.61	0.224871	236.379	122.61	2.88598	0.0348075	29.9481	18.9673	154.719	2.29265	5.7142	50.1398	21.1721	41.2952	5.96512	20.99	16.0786	12.6313	0.109252	4.16467	0.839504	1.59534	4.85645	69.1338	1.7533	0.0113471	9.08919	0.063602	3.5655	0.464938	10.0219	14.8833	3.93254	19.5707	21.8183	41.3986	100.072	6.85261	52.9831
TCGA-AB-2963	0.0991409	0.0139053	20.4008	5.80456	0.00580077	19.2151	17.9117	2.98761	44.0254	121.376	26.4092	0.883393	168.841	75.8432	5.10706	0.0596478	128.185	14.5776	80.1746	4.59467	141.046	147.496	72.5055	30.5501	7.35825	18.5139	30.5317	51.4492	0.199792	5.19616	0.732517	2.5886	5.14625	116.409	9.75054	0.0242965	27.1476	0.114101	9.46184	0.153656	19.3657	47.6858	7.45662	68.543	25.3209	73.0945	183.825	9.90737	99.1984
TCGA-AB-2822	0.0884076	0.0219634	97.0091	4.84573	0.0215754	26.7802	9.24306	6.61669	26.6118	77.8188	34.6558	2.81711	206.255	152.549	3.33734	0.0678191	122.13	14.6135	127.705	9.45708	122.563	122.873	83.105	76.7032	4.73074	18.9342	21.513	39.5036	0.152215	3.75265	0.958447	3.11807	3.56946	252.747	4.75188	0.0566495	27.5927	0.106243	24.1098	0.0873276	13.8607	39.6056	14.4043	39.1818	17.9847	63.6581	80.2443	10.9294	43.2046
TCGA-AB-2871	0.0236463	0.0037858	15.6044	0.294214	0.00366979	6.65596	5.64519	1.40235	6.34559	44.1279	21.4215	0.644178	205.483	123.391	1.2717	0.0400263	21.9867	13.9153	105.533	2.38283	11.5342	52.4189	6.82856	21.51	3.73929	15.4712	2.76903	3.37782	0.0384456	1.46366	0.922019	1.24876	2.41365	58.3823	0.378149	0.013098	9.68837	0.0230681	6.19211	1.35195	5.90736	12.1123	3.4956	20.6148	8.62904	31.0016	51.1124	5.03804	44.6726
TCGA-AB-2915	0.0151155	0.00881983	19.537	1.67537	0.0088747	44.1731	101.471	50.8039	39.4162	18.1906	60.8717	1.30452	291.604	112.342	4.04612	0.0290693	117.317	17.3961	126.834	9.93807	167.333	121.761	40.6751	40.8325	0.969446	22.4491	12.0848	8.94275	0.0465649	1.31518	1.00828	1.04351	2.6329	5.33344	3.35862	0.0299724	26.4515	0.0492791	25.0414	3.60393	1.43526	7.95145	7.65374	107.699	39.7278	61.3413	62.3792	11.0165	21.3611
TCGA-AB-2901	0.494736	0.0264788	51.3792	6.72101	0.0183904	21.0885	3.45824	1.88694	9.29913	135.184	35.495	1.14454	331.774	169.39	6.29819	0.112671	122.186	19.2844	158.419	6.29749	104.913	257.314	48.5438	67.2726	46.5973	19.4952	32.9748	70.4267	0.128771	10.1768	1.03404	5.03172	11.3649	396.933	0.586381	0.13255	19.493	0.114239	23.1807	0.231014	128.466	130.813	14.3203	60.0823	23.4119	70.5428	127.43	11.1237	154.627
TCGA-AB-2966	0.31053	0.047833	23.4498	3.81669	0.0162424	7.24899	0.324815	1.15529	16.22	94.2068	32.3209	1.38754	194.937	99.632	3.86319	0.123512	39.63	15.4465	88.8579	7.54912	16.4808	120.184	27.7198	46.2426	33.1804	19.9011	19.7276	64.727	0.49911	16.8074	0.942777	4.23908	4.56395	1551.8	2.56786	0.167129	21.0302	0.22996	15.2707	0.331303	76.9586	108.963	13.8222	29.517	21.1793	51.8069	88.6036	5.35529	81.2818
TCGA-AB-2820	0.167188	0.0325454	15.3413	3.45223	0.0204122	12.9888	0.5934	1.15456	14.0941	54.2301	21.8071	1.41572	259.739	150.643	4.2432	0.0548524	45.4479	18.7923	121.923	8.01204	44.7341	136.974	13.564	45.2682	29.0328	21.0796	14.9571	42.5116	0.229488	7.64292	1.05663	3.3572	5.08315	390.194	1.72767	0.123476	14.5458	0.153049	9.08762	1.25837	29.7241	76.8277	8.10597	32.6207	28.6996	32.6757	39.1777	13.406	44.8644
TCGA-AB-2895	0.0284864	0.00879152	69.3713	1.52702	0.0108438	22.7256	20.4724	7.13221	12.7479	51.2511	32.887	2.82535	266.403	193.415	2.82794	0.0358162	53.7332	18.9598	164.665	7.20262	143.213	68.5494	41.016	54.2343	0.984202	19.9978	7.01913	7.96862	0.0510274	1.28816	0.966116	1.7666	3.75626	37.0413	2.06713	0.0190845	15.0068	0.0251209	16.1789	0.394052	3.5232	13.5723	6.72371	29.9655	17.7543	40.1511	58.7008	11.7138	34.1451
TCGA-AB-2988	0.0223118	0.00367506	11.7825	0.44254	0.00326284	12.1836	9.01552	1.76354	8.09066	41.1099	26.8016	0.41693	213.515	159.23	2.43872	0.022992	51.4486	18.4381	184.53	2.11741	49.9838	48.422	25.5465	45.0909	1.3024	18.1836	11.583	6.04313	0.0586751	1.69187	0.874363	1.40063	3.06287	29.8983	1.70625	0.00820529	9.01163	0.0198329	5.20389	0.209981	4.11316	7.47393	3.6629	20.3746	16.9457	44.9534	55.0091	7.22665	33.2935
TCGA-AB-2867	0.120421	0.0512055	57.5698	10.3974	0.016466	32.1234	4.08927	5.66984	56.1549	124.948	25.1028	1.62813	176.814	69.2718	6.76582	0.0773258	146.233	11.52	86.1403	6.63084	154.133	149.047	110.283	21.1325	8.36708	19.1711	34.2183	88.2836	0.57679	8.05657	0.914881	1.9776	4.34008	403.35	8.65666	0.116142	35.3561	0.27079	28.7811	0.836358	20.9315	74.798	12.5025	125.41	15.9517	67.7354	121.919	10.4311	113.7
TCGA-AB-2874	0.0306566	0.0351612	18.6221	1.88911	0.010679	50.1845	6.94035	12.4143	54.8227	50.8341	4.58005	2.49022	86.6819	33.3832	8.71823	0.030129	99.547	5.51277	60.2818	5.76881	319.471	139.262	113.95	1.01273	1.35709	21.0027	110.998	44.0385	0.472914	5.23462	0.773456	0.501833	3.25	107.782	7.046	0.0572475	48.3732	0.107589	16.2473	7.57525	2.09231	20.0242	4.27266	116.927	1.60495	63.0361	139.911	25.3656	52.6605
TCGA-AB-2898	0.112604	0.0481375	155.289	18.8717	0.0184791	70.9002	25.1343	28.5918	53.1419	86.5883	40.6191	5.2606	237.61	122.837	10.4182	0.0959211	168.781	16.7789	94.0602	23.1995	351.418	138.857	130.977	19.1045	2.82479	22.9396	19.4673	44.2838	0.16308	1.81206	0.955849	2.09079	2.96459	115.394	12.0788	0.0676594	35.1148	0.113217	34.4386	2.74477	9.21265	35.0823	13.4329	129.466	28.3556	52.0685	106.213	31.3018	70.706
TCGA-AB-2955	0.316962	0.0197655	12.7557	4.24759	0.0132579	5.08634	0.284781	1.1451	18.8231	107.116	19.7207	1.24108	151.947	72.7645	3.00836	0.07493	36.2337	11.264	75.808	8.06668	19.6003	141.51	23.4815	29.1191	21.4608	16.0536	21.1089	40.2873	0.394249	22.084	0.875688	4.11772	4.32062	1799.08	3.52461	0.0738762	19.7329	0.196758	15.028	0.136605	78.7734	135.522	15.4898	36.5699	11.3998	45.5516	122.466	5.3432	70.5374
TCGA-AB-2882	0.0679429	0.0255943	28.7824	6.68471	0.0165795	36.1718	10.1475	5.14667	33.3269	33.1973	26.891	2.15245	193.084	99.382	9.17497	0.0274609	87.7737	14.8643	105.719	13.5123	62.1129	104.604	25.6128	27.2064	4.89003	22.4801	11.3063	22.5922	0.116123	1.99797	0.921042	1.33488	4.00922	73.2469	4.14607	0.129574	23.7753	0.0874921	24.3641	2.77952	9.37088	28.7764	5.31889	125.738	21.0089	32.9696	57.8716	19.9837	58.541
TCGA-AB-2946	0.0327496	0.00942175	13.4265	2.29304	0.0046152	22.8368	16.109	4.30712	28.0856	59.0241	14.209	0.767608	167.061	56.7983	4.31857	0.0269945	98.6774	10.6409	87.8673	7.0149	101.965	94.1072	56.1749	15.5521	1.24371	19.8938	17.9354	20.4621	0.141433	2.69963	0.758295	0.860513	3.11172	69.0703	3.84642	0.0219347	20.8687	0.0693558	17.7065	0.744836	5.46655	20.1842	4.67777	51.6972	10.3312	47.1429	122.288	10.8895	51.3116
TCGA-AB-2920	0.187952	0.0393296	57.4925	5.57265	0.0107027	20.2903	0.300006	0.837483	18.9531	76.7122	39.5339	0.340013	377.845	229.782	6.01513	0.0716518	44.7979	29.1097	147.929	5.99857	66.5861	58.4343	31.5795	62.141	24.9313	28.2265	11.1814	36.7963	0.204246	3.52374	0.950663	1.50787	10.9542	224.861	2.09018	0.228135	15.8049	0.318737	8.089	2.495	21.5463	66.0511	4.66063	78.3512	51.5104	30.1514	51.9352	14.4188	137.223
TCGA-AB-2851	0.13589	0.0294446	25.2301	31.3416	0.0138342	24.4332	14.8139	4.92154	77.5905	144.216	30.6225	0.830088	218.484	77.3911	5.67973	0.0290509	147.976	16.9538	105.724	14.6732	188.418	113.26	62.3784	56.3839	19.6556	25.8372	15.5333	42.0555	0.220514	2.3752	0.808593	0.593844	8.32352	27.9655	4.54835	0.076108	23.4811	0.202998	14.1721	3.0684	33.5681	71.7782	5.85323	180.072	57.1477	35.0928	130.162	15.5537	136.34
TCGA-AB-2896	0.0288722	0.00483858	5.70582	0.499086	0.00306292	8.38354	3.33251	1.05841	11.1217	53.7387	21.6367	0.283121	206.885	155.033	2.47645	0.0195353	33.4552	19.4391	163.187	2.54081	21.6203	56.973	27.7639	54.0277	3.44928	19.492	11.0054	7.19925	0.0805834	2.6834	0.804788	1.48018	4.68378	52.8326	0.741178	0.0110398	10.0901	0.0453839	5.84545	0.252439	5.65989	12.2719	2.93653	30.4198	19.4332	39.1418	71.4466	7.35452	55.7429
TCGA-AB-2881	0.0440716	0.0145489	18.5773	2.04941	0.0080779	27.8342	6.14709	4.20257	39.2157	58.636	19.5983	0.640211	170.351	88.4136	5.65171	0.02728	83.8606	13.5017	121.439	4.56263	75.0184	90.6984	72.4008	20.6381	3.48116	22.5594	19.5943	21.15	0.127622	3.20409	0.843303	0.886387	4.21802	47.6666	2.81705	0.0346795	19.6759	0.115024	15.7508	1.51476	6.35531	23.8343	6.69049	75.1055	17.8049	49.9281	75.6664	14.6403	63.4815
TCGA-AB-2818	0.0594463	0.024589	55.9362	30.2396	0.0239631	64.7195	178.26	97.2064	101.515	85.2294	31.4628	4.08043	169.611	47.1164	8.41897	0.0339166	286.32	13.403	54.3952	33.3478	651.792	181.034	216.381	45.8785	2.01448	24.2455	31.4549	45.575	0.127064	2.49264	0.756522	0.710278	3.83503	14.0252	36.0679	0.0421943	39.6541	0.0730096	34.5677	0.698545	6.57549	39.9657	16.589	189.698	48.276	91.8144	122.883	19.3137	51.5142
TCGA-AB-2986	0.250414	0.0290126	28.8896	1.44811	0.00294905	9.03025	1.05932	0.372366	15.4577	202.798	39.9087	0.209324	209.617	207.387	2.8052	0.0511433	59.0842	24.6312	199.752	2.34653	7.59684	62.0577	40.9455	134.19	20.1881	21.4053	9.31234	39.0279	0.294627	3.76084	0.850144	2.50106	8.03859	1586.72	0.335457	0.0778921	14.2827	0.325187	7.55974	0.26758	71.3314	57.3312	3.45771	73.4333	45.5577	53.4567	86.8359	8.29456	234.428
TCGA-AB-2942	0.134711	0.0311199	14.1384	4.44867	0.0109123	20.2138	1.43247	1.67592	34.9193	92.3855	23.2888	0.578653	191.744	87.7897	6.24461	0.042679	88.9502	15.5615	104.217	5.69201	48.6661	121.667	68.2336	31.9126	21.0284	22.3942	26.8235	59.1331	0.325553	8.77841	0.855804	1.21172	5.81838	300.163	4.03976	0.0879889	23.6143	0.284669	12.5785	0.780405	26.5277	69.2818	10.4547	78.5992	25.4226	56.2781	93.9594	11.5235	99.0742
TCGA-AB-2870	0.0255952	0.0192632	19.241	7.77818	0.0168255	41.0019	13.2092	16.1673	83.6788	35.0244	20.0387	1.11663	217.942	80.4452	6.93884	0.0331484	101.935	15.1338	105.717	7.8217	235.818	111.686	87.1671	14.4822	1.51564	24.3154	32.4649	36.1462	0.130655	3.09981	0.864973	0.667559	4.03013	23.6707	19.8516	0.0479813	25.6611	0.0946668	17.3479	2.31626	3.28027	21.0142	7.22853	93.3833	19.4396	37.2132	67.8561	18.0549	43.7088
TCGA-AB-2924	0.0570728	0.0111046	27.0951	8.27246	0.00734002	35.3683	20.5816	5.9291	51.4345	101.254	22.8196	0.734569	202.232	57.0379	8.00309	0.0309011	141.036	16.4667	58.316	6.28225	111.434	105.646	84.9179	43.0257	4.24076	25.4826	24.0022	22.8747	0.153138	3.52721	0.822076	0.421231	5.86672	23.9408	14.2971	0.0238428	24.9289	0.103257	7.8374	1.07801	10.6054	34.967	5.94144	125.569	54.7309	105.248	178.093	17.0578	82.0359
TCGA-AB-2943	0.192892	0.00748246	8.39427	0.39445	0.00406977	4.19949	0.0665734	0.682522	1.97542	59.7244	25.157	0.298767	275.239	97.7718	1.4156	0.156569	16.7966	12.7361	73.8797	2.34931	14.2103	137.352	0.60219	9.33838	94.904	13.0427	5.07934	11.5343	0.206284	8.60976	1.16194	4.52884	5.32124	565.494	0.414191	0.0531382	25.3485	0.142957	3.40085	6.43101	46.4672	100.088	7.26212	17.1913	7.88366	30.8716	48.9351	2.59336	111.287
TCGA-AB-2876	0.0959744	0.01986	15.518	2.5164	0.00735818	13.3205	1.98472	1.40598	21.4971	104.812	20.1056	0.776138	155.159	82.0588	4.98623	0.0549201	79.9271	12.8912	97.2077	4.42523	37.6315	114.158	51.2354	24.9604	10.4269	18.0267	33.8231	55.9999	0.489743	8.00018	0.851479	1.81046	5.21427	610.434	3.4631	0.0540558	26.3255	0.237104	12.6792	0.279786	20.6526	60.5267	6.21347	62.3005	14.5905	62.95	188.017	7.41324	92.2382
TCGA-AB-2821	0.182266	0.0259581	40.1503	7.94727	0.0107557	12.4157	3.38526	2.44015	24.4966	80.3893	26.6815	1.22457	193.692	85.2932	4.77303	0.0772302	62.6037	15.161	83.3983	5.85354	52.2551	100.717	27.8367	24.8981	15.0421	19.8984	14.2179	44.0114	0.20552	3.43767	0.885307	2.37059	4.77023	282.929	6.70322	0.068785	20.8079	0.068547	9.21868	1.48368	37.7953	84.4679	6.55188	56.304	22.0829	50.0551	90.8758	11.9949	97.4017
TCGA-AB-3011	0.0405906	0.00959355	30.6454	4.16434	0.00973649	36.8627	17.1957	5.96699	28.6104	43.2338	12.1211	2.11895	235.064	127.173	8.37137	0.0419705	74.9337	13.1611	112.697	5.98469	166.739	59.9884	78.2073	10.8575	1.69969	20.5269	24.0061	20.5329	0.150726	3.56389	0.8964	1.16608	1.70351	46.8393	21.5307	0.0216296	17.3616	0.0258802	10.7646	1.15096	4.5926	22.6575	11.1982	35.0178	6.09999	28.9774	50.6327	20.8556	27.4669
TCGA-AB-2890	0.0799572	0.0129906	27.6295	2.80317	0.0139518	13.9467	3.84503	3.13827	29.6028	56.2981	24.8723	0.756023	193.666	96.4038	3.86158	0.0644392	71.1582	13.5789	84.2214	4.58652	46.3582	109.007	32.5209	34.1574	9.8612	19.3166	9.96894	24.6061	0.134492	4.14657	0.882017	2.6648	4.21471	79.1434	2.01526	0.0778999	17.992	0.0912699	18.2628	1.70484	17.9552	29.4889	8.40787	63.6252	22.0455	35.9392	41.2974	8.68867	55.5458
TCGA-AB-2995	0.0486777	0.0107593	40.1187	1.36181	0.00565576	13.3884	26.4503	7.47611	13.0599	33.6813	32.3133	1.59419	265.073	127.942	2.67635	0.103593	54.2934	13.5533	99.7429	5.47808	83.6476	108.558	12.547	18.8456	3.81252	14.7297	3.60346	11.1574	0.0495303	1.62559	0.955927	5.91858	2.4094	221.874	2.18052	0.0347585	29.377	0.0444689	17.5543	2.18319	8.08197	25.8696	7.31755	30.217	8.93031	36.8753	60.521	7.77217	68.7423
TCGA-AB-2931	0.0348361	0.00761923	18.5939	0.972073	0.00605609	16.7473	6.55458	1.95949	14.771	43.2586	33.5277	0.589561	271.655	160.649	4.00167	0.0248947	55.3569	17.9141	142.663	3.55214	52.3265	89.393	29.1703	57.6468	4.6504	19.5965	10.5946	11.8647	0.0608626	3.05135	0.922796	1.63032	5.46077	40.3299	1.05788	0.0239329	9.4178	0.0462273	8.80587	0.450616	6.34959	18.6132	5.25459	44.3522	23.7778	37.9276	78.6229	7.98666	54.0873
TCGA-AB-2830	0.024156	0.0133482	20.0128	1.44509	0.00589549	33.3589	5.22687	6.86404	29.5932	42.3683	18.9408	1.0405	289.228	93.2936	3.74753	0.0322895	61.9666	11.9686	144.264	5.66131	132.737	85.0401	38.1807	9.27197	2.0242	16.6055	8.16527	7.05947	0.0648515	1.34627	0.943752	2.12974	2.28983	45.4933	1.09434	0.0286621	30.3558	0.0643779	9.7872	3.58109	2.68624	12.702	3.92391	45.4259	6.27402	40.2196	87.5029	13.414	67.8285
TCGA-AB-2917	0.154092	0.0538832	70.8717	4.89113	0.068003	38.3445	28.212	11.1317	58.4672	83.8484	36.6366	4.87227	205.936	120.474	7.92447	0.124322	269.147	14.5717	106.176	12.6926	300.654	241.207	73.7866	45.5486	8.81867	17.8725	30.7293	79.0355	0.370881	7.14487	1.01046	7.05694	4.94212	462.558	7.38665	0.199447	32.2017	0.157107	53.0271	0.0539831	21.7813	84.3293	46.028	105.234	13.1256	81.9643	70.0637	13.5478	64.8087
TCGA-AB-2889	0.0748156	0.0196077	10.9414	2.93294	0.00732887	17.2283	2.6398	2.77259	42.4732	68.7627	11.9969	0.658863	137.981	57.4381	4.74729	0.035213	65.5296	10.7356	77.8022	5.24705	66.2576	98.6797	64.8328	7.81721	6.01722	21.7462	34.5319	48.8676	0.286736	4.46133	0.755296	0.661254	5.21471	169.499	4.59693	0.0405988	23.8443	0.157841	8.34085	1.99801	12.5149	35.5025	5.13271	63.804	10.2128	43.5435	140.248	12.1161	79.6878
TCGA-AB-2878	1.25362	0.0695002	36.6826	5.21635	0.0092581	7.64659	0.239229	0.801504	7.74322	143.358	40.0827	0.461158	214.919	101.358	4.99294	0.232119	66.1191	15.7357	80.2111	4.94122	50.9092	263.853	6.96008	18.8461	164.737	15.6312	16.767	115.933	0.561192	17.0156	0.973039	10.4216	8.05203	2923.41	0.925022	0.306958	30.699	0.35552	8.21551	0.893204	237.111	318.047	11.6749	62.3464	17.9192	51.6718	131.06	4.25346	290.962
TCGA-AB-2965	0.290283	0.145235	120.665	41.5022	0.0529453	76.8841	37.4567	22.6587	178.5	159.986	27.8603	2.90841	207.137	38.2639	18.585	0.113142	396.595	20.611	31.7674	22.5231	697.337	437.328	278.608	74.8353	12.9663	31.9562	67.5894	180.223	0.351509	14.3029	0.841093	3.78349	6.36844	181.029	56.1851	0.307658	58.426	0.218966	26.7196	0.159043	25.808	141.775	28.2863	349.584	128.432	436.04	312.599	27.0665	137.327
TCGA-AB-2940	0.26904	0.00889835	5.85434	1.07701	0.00350069	3.03318	0.271505	0.661668	5.94033	115.228	14.385	0.432036	196.859	72.7338	1.99062	0.100506	30.2598	12.7712	70.7982	3.66124	5.11522	167.166	6.08605	12.8383	41.6348	17.8529	10.8405	21.8918	0.241435	9.36035	0.791001	3.42071	6.87068	486.044	0.473545	0.0312936	12.7783	0.0935409	5.88626	1.81937	95.3543	57.1027	5.34134	24.2936	9.28661	33.5773	103.631	4.72606	127.096
TCGA-AB-3008	0.0217748	0.00649527	10.0936	0.392227	0.00382994	10.6522	2.63809	2.04425	9.29688	48.7266	22.6904	0.559564	325.246	136.321	1.89102	0.0515118	30.0401	15.4119	151.162	2.34437	16.0394	87.4182	12.991	18.5148	1.4272	18.8408	5.92419	8.33679	0.115801	2.76081	0.986464	2.15615	2.75067	109.62	0.721407	0.0173603	12.3782	0.0762881	10.8047	1.16247	4.57158	11.3561	3.94444	19.4469	7.77965	46.666	63.4334	5.69838	39.8586
TCGA-AB-2959	0.14109	0.107314	206.181	18.5096	0.29472	54.7817	22.9451	53.0402	88.3296	55.3646	38.1378	5.8742	195.295	86.7757	11.8488	0.113785	227.32	11.3236	94.7849	25.4418	604.993	279.185	180.593	41.3148	4.08569	17.4487	34.5185	99.9378	0.297614	10.2666	0.975141	6.15273	2.1286	242.678	24.8645	0.352435	36.6989	0.141839	84.2681	0.0773937	15.8435	55.6052	41.4911	102.281	17.0764	63.5746	79.7888	18.6094	33.9754
TCGA-AB-3009	0.0917192	0.0270189	54.5664	5.28254	0.0163746	27.5902	1.53569	9.31326	35.7539	38.5238	6.53601	2.16613	117.396	38.8961	8.56721	0.0475657	40.9607	5.97241	54.0512	7.79424	155.603	114.334	53.1088	2.31272	1.5149	16.311	27.6326	39.2959	0.332805	6.40757	0.777031	1.21262	1.94409	148.862	19.8884	0.0507231	28.731	0.0869057	14.8358	1.47204	9.39933	42.5741	8.68814	36.756	2.31738	36.8465	61.7453	19.9568	33.7196
TCGA-AB-2976	0.253215	0.0499669	79.1275	10.011	0.0152901	17.824	3.0223	2.04967	24.7577	128.696	36.3937	1.49337	213.31	121.836	5.77607	0.0932169	85.7098	16.063	126.191	8.33863	97.2862	137.322	65.0127	44.9192	15.4218	16.9231	18.0539	76.8165	0.264054	6.63056	0.883097	6.25578	5.52142	785.503	5.75668	0.168984	23.2674	0.160571	12.1118	0.0923825	34.3582	98.2874	13.4106	68.8703	21.2762	44.1119	120.017	8.83635	152.259
TCGA-AB-2975	0.104575	0.0236924	13.0863	3.64519	0.00876284	12.2185	2.75434	1.49714	23.0344	104.613	17.7354	0.9913	173.246	87.9043	6.74853	0.0849605	50.9031	13.7314	102.281	5.84704	35.4825	113.702	60.0252	15.5894	23.526	19.7047	40.2311	61.8941	0.39338	11.4105	0.841802	2.72567	4.70684	531.576	5.17343	0.0890003	18.3053	0.190656	10.5979	0.75333	21.7344	67.4478	9.23028	46.728	13.6646	37.179	163.681	9.06612	100.344
TCGA-AB-2869	0.0278433	0.00836716	17.5677	1.064	0.0049244	12.3689	5.43933	2.27234	13.0428	50.7419	28.6094	1.10598	223.914	155.344	3.1133	0.0463958	31.107	18.2416	135.157	4.36712	36.5556	72.0818	25.4544	32.7235	3.25819	19.6187	7.87417	11.6666	0.078653	2.14227	0.807833	1.96794	3.49835	100.471	1.38886	0.0208347	10.1186	0.0377377	8.49775	0.501626	4.6628	15.3153	4.59864	34.5782	14.8993	36.1871	65.0377	8.03476	54.0514
TCGA-AB-2857	0.0664788	0.0146606	19.3983	1.46207	0.00693059	20.4963	10.4904	4.53707	8.94676	48.3334	24.8034	0.961971	198.775	85.4226	5.78562	0.108979	72.7721	11.8866	74.2634	4.80904	264.273	242.07	10.5699	9.95762	5.99864	16.9431	11.268	17.8991	0.0884907	4.34729	0.844522	4.61299	2.55503	113.934	0.328294	0.0552414	18.8914	0.0304093	20.4149	3.44802	10.4061	55.8685	9.26919	57.7765	7.07773	37.4338	101.877	8.2801	62.9171
TCGA-AB-2934	0.23356	0.032705	21.2667	11.4071	0.0110871	11.0481	0.424368	1.4988	24.9135	122.173	32.8793	0.590727	221.087	113.612	5.22395	0.0919346	94.847	19.4411	100.48	6.24893	35.7065	102.467	33.2945	50.7286	51.4495	24.0053	18.0183	64.6273	0.317647	4.98143	0.863465	1.82753	9.40569	167.686	2.69986	0.161255	18.7081	0.169291	8.22176	2.46583	61.0561	122.807	9.62215	86.7059	46.3307	32.7393	66.9833	10.3027	152.572
TCGA-AB-2930	0.0182452	0.0041893	6.97315	0.690546	0.00313569	10.8828	2.41702	2.08212	13.4758	26.3445	13.365	0.38992	201.488	109.486	3.27068	0.0233834	31.9695	14.2996	134.904	2.35584	47.683	56.5463	35.6175	14.3705	0.825301	20.7265	13.2189	10.2911	0.0935838	2.31401	0.802909	1.19544	2.72027	26.6258	3.65692	0.00859943	12.7071	0.0438783	4.59758	0.989348	2.41829	7.56415	4.41841	18.726	8.80922	38.598	66.4801	8.80223	29.8211
TCGA-AB-2983	0.121774	0.0292548	33.078	9.91608	0.0185953	18.4538	11.592	4.342	51.6392	53.6423	28.1137	1.67105	210.651	91.6198	6.01298	0.056751	84.753	15.0117	101.936	9.96203	92.0631	120.368	63.0787	44.7544	9.66489	19.53	15.9565	49.3634	0.149496	3.98392	0.852314	3.64233	3.68602	252.522	8.73167	0.0875573	31.621	0.105363	15.7774	0.288491	18.3468	54.7621	10.7744	54.5558	21.1663	45.57	125.53	10.1045	73.0316
TCGA-AB-2970	0.197707	0.0300435	28.5218	8.86988	0.0232412	20.6469	2.93358	3.89649	43.0167	70.4724	24.6358	0.750281	205.141	69.7986	6.95615	0.0653224	108.55	14.4229	83.9105	6.4094	67.4638	155.335	58.1768	29.5766	21.4801	19.0067	19.9829	58.852	0.210174	5.66382	0.820459	4.10522	4.69494	194.559	5.50024	0.105092	26.644	0.1551	13.4303	0.278836	41.4401	63.4102	12.8531	68.5233	19.3415	51.6008	117.99	10.6589	76.8354
TCGA-AB-2884	0.0400125	0.0109448	25.7199	11.7076	0.00937516	46.1754	180.983	17.2005	82.5131	52.4336	23.9261	1.50002	211.24	80.366	7.17605	0.0250564	123.667	12.8136	120.423	8.56677	290.794	110.585	108.819	32.2841	2.25842	20.4672	18.7695	19.9768	0.0730344	1.95144	0.795523	0.878334	2.95803	7.89517	16.8221	0.0247814	21.6259	0.05911	20.5195	1.05069	6.06155	16.7342	7.58834	95.1372	23.0942	36.97	101.091	17.9268	50.787
TCGA-AB-2935	0.0470089	0.0152888	45.9382	8.63722	0.00745707	43.8636	27.2412	9.37719	43.3484	37.5799	23.2305	1.26924	174.89	60.3046	9.73415	0.0207762	107.063	13.0567	72.1723	7.33798	255.733	59.3941	62.9338	26.8217	3.04754	20.1113	8.88139	35.8381	0.043012	1.20388	0.753274	1.79798	2.01986	32.7462	11.5813	0.0258669	20.1431	0.0367506	20.1774	0.562535	4.84238	34.0605	5.06772	106.733	28.772	49.5398	68.6068	21.7926	66.5941
TCGA-AB-2836	0.0487461	0.0201776	28.768	28.0837	0.0134269	42.8638	26.9471	16.5852	77.7619	72.4982	32.2267	1.12244	219.997	75.2643	8.32169	0.0300869	189.452	16.3825	91.3047	13.2835	288.344	136.697	57.616	41.3951	4.60897	25.3204	13.4741	35.8862	0.126839	1.72113	0.865357	0.786011	4.2317	8.70393	7.45088	0.0486322	21.5563	0.104564	17.5624	2.86753	8.22092	29.448	8.57017	162.118	53.4299	43.6618	90.9151	20.4264	69.9798
TCGA-AB-2819	0.071756	0.0341366	24.3504	3.49382	0.0093053	29.3128	14.2643	6.98339	53.3192	38.7336	29.7226	1.64466	133.746	84.0721	8.08539	0.0415553	59.8439	12.5543	136.549	5.14041	198.017	89.8536	117.235	11.7007	1.62978	18.3978	52.4828	57.7681	0.333999	4.5519	0.748799	2.097	1.39361	120.086	10.6863	0.0568351	38.0689	0.0890028	13.1111	0.812592	5.59247	14.2614	9.3255	56.8813	12.0975	56.4641	65.3501	13.1644	49.1143
TCGA-AB-2845	0.0245172	0.00556898	4.69566	0.735006	0.00303743	13.8506	3.17284	1.98978	17.6222	36.8982	11.8553	0.362349	157.934	74.5503	3.27144	0.0180228	38.7125	11.958	110.137	3.23791	34.5357	55.2865	42.69	10.913	1.07059	20.7692	17.2622	14.0473	0.153749	2.97019	0.749645	0.834291	2.61731	57.4499	2.33653	0.0115839	13.9003	0.0550848	7.55524	1.2348	3.90531	10.559	3.01356	33.452	8.12016	39.3173	59.7403	10.627	34.1557
TCGA-AB-2847	0.0346752	0.0161934	77.6149	3.76392	0.00837284	49.4604	42.0787	13.9635	55.9673	38.5244	28.533	1.80837	250.402	131.594	6.4218	0.0441819	122.374	16.7936	155.516	7.30961	208.475	74.3541	67.957	31.4776	0.640231	21.8109	8.74433	26.5606	0.0757724	1.06521	0.934906	3.79105	2.32751	64.5931	4.28707	0.0550176	27.4946	0.0944231	27.7947	1.03592	2.84395	10.8985	7.05441	66.7678	19.5026	43.4239	96.1358	23.1045	45.2959
TCGA-AB-2806	0.0564132	0.027991	75.3042	3.98014	0.0302077	60.2087	94.3625	26.8074	35.0009	44.9819	16.0844	5.64739	124.249	77.2534	6.83054	0.0439597	142.356	9.41817	91.0199	9.31401	432.51	112.079	174.899	9.60608	0.527706	19.7538	51.2254	60.9139	0.315656	5.17486	0.872343	1.26839	1.58005	99.2323	23.4621	0.0553614	38.79	0.0840502	25.9803	0.602943	4.12775	11.4956	18.2405	50.7218	5.99814	72.1988	41.7223	16.9633	23.8128
TCGA-AB-2977	0.107595	0.0236382	20.3171	5.84304	0.00317936	34.0569	3.77615	1.26471	25.7274	205.381	41.5143	0.206214	251.037	170.426	4.45163	0.0163578	101.204	22.4793	197.609	5.12801	61.8892	45.2779	89.8086	83.0895	8.35559	27.6896	11.2303	19.4773	0.199683	1.43422	0.734241	0.449189	5.47828	81.3179	0.0870691	0.0585993	16.348	0.290397	10.9398	3.49073	19.5226	38.5844	3.51014	182.083	62.6805	41.7566	40.7167	14.7055	154.616
TCGA-AB-2938	0.235198	0.0307457	68.0074	11.5872	0.0135152	47.4973	35.2537	22.2321	5.40701	61.9163	29.2037	4.76057	200.229	76.4368	4.93362	0.079305	62.5518	12.5156	109.231	38.8142	538.943	1503.28	54.0601	25.9888	4.36447	16.7177	8.65949	35.9227	0.0508943	4.41774	0.734897	6.93217	3.27814	350.811	0.106117	0.173032	17.7971	0.0552023	77.8287	0.829288	27.2792	141.709	19.4004	71.6116	7.4975	30.7813	132.949	7.89433	76.9089
TCGA-AB-2916	0.144802	0.24818	140.757	95.6724	0.166274	83.4514	62.7463	245.659	236.911	127.224	42.8461	10.6908	184.616	49.4901	10.5667	0.117826	320.339	11.9207	68.5385	97.0312	1082.46	371.462	343.008	41.7968	11.7918	20.6652	50.0335	183.076	0.43839	6.03744	0.868246	1.47383	5.61675	85.2098	54.0762	0.519014	82.4223	0.434676	85.3434	1.26241	18.2106	121.258	36.7895	405.307	49.1691	73.7175	177.124	27.5663	104.8
TCGA-AB-2815	0.216435	0.14288	48.7612	34.2876	0.0588223	53.2485	11.0009	20.8375	143.489	110.414	23.4263	1.82978	202.691	46.068	12.1197	0.0722318	256.767	13.8147	52.5419	20.7803	388.321	277.493	180.093	16.9143	15.7853	25.5921	63.8836	176.234	0.609652	8.51434	0.836909	1.80856	7.5023	176.603	40.0765	0.321969	63.5827	0.359218	25.3101	0.774201	30.7708	139.54	19.1051	199.835	34.9806	98.0229	223.451	19.7113	121.33
TCGA-AB-2984	0.899287	0.151732	36.628	11.4751	0.0140032	18.6209	2.38808	1.14503	45.8089	213.112	39.8263	0.619089	294.634	151.566	7.1945	0.0860191	110.835	19.1129	124.513	11.5922	47.8211	93.9149	128.793	67.3278	92.0144	22.788	26.5852	238.078	0.805388	17.2852	0.888004	5.73171	3.71531	2567.28	1.82591	0.499364	17.804	0.487984	18.6929	0.42294	160.08	201.553	22.3432	91.4189	33.7809	61.4818	199.075	7.76359	236.825
TCGA-AB-2812	0.769301	0.0502954	42.0573	4.93944	0.00977024	7.15063	0.190362	0.423694	12.6158	256.439	28.9951	0.545646	171.234	127.189	5.38762	0.143193	78.679	17.0278	103.494	3.22913	10.8876	93.3973	31.5306	44.1262	74.8038	16.901	29.3931	114.888	1.14748	17.8655	0.898349	3.59627	8.99654	2196.85	3.33181	0.178369	14.3541	0.291813	4.43761	0.172325	197.162	189.315	12.8026	72.1315	25.2675	49.0129	72.9379	6.97221	215.869
TCGA-AB-2952	0.06099	0.0169238	45.268	8.18991	0.00662379	51.1058	11.1156	6.25125	24.1425	46.8675	56.3098	0.360168	453.213	156.359	5.25575	0.0392935	56.9647	22.8935	155.265	7.93232	241.249	94.5703	11.9499	21.2613	5.69223	26.8151	4.54557	14.3337	0.103794	1.53139	1.0046	0.79477	4.60103	35.374	1.00512	0.0868607	30.9607	0.1643	13.0953	16.8591	7.2642	26.6884	3.86088	120.917	35.8797	33.6325	50.5196	14.4011	102
TCGA-AB-2990	2.05866	0.0100103	4.38316	2.00763	0.00176237	1.68001	0.0788182	0.1505	7.4805	212.905	8.70921	0.122071	140.224	83.7337	4.06522	0.0668587	38.4467	15.6249	66.5592	2.23713	0.859509	116.076	14.5044	11.5097	359.737	18.1226	25.1015	67.3364	1.01132	18.2284	0.651083	2.39469	16.6354	3969.7	0.722433	0.032451	14.5892	0.193361	2.42208	1.1864	707.975	182.239	4.59891	39.9805	11.447	19.2214	198.265	5.46335	337.496
TCGA-AB-3002	0.0899145	0.0197743	24.3815	8.59468	0.0082476	24.015	13.5195	2.62665	71.9219	66.2595	41.117	1.16613	267.253	126.839	7.03885	0.0466172	107.216	19.4588	129.557	6.28936	121.199	83.0651	71.1205	65.4942	5.33573	23.105	25.3608	62.4053	0.274864	4.88629	0.861091	3.47969	3.00653	168.836	6.75465	0.054887	23.0165	0.144783	23.0941	0.983141	16.8195	44.8511	8.97373	66.7952	39.2714	58.7068	86.9416	14.4936	71.1579
TCGA-AB-2908	2.18019	0.0260111	15.6632	2.34081	0.00332417	2.95062	0.0317635	0.215401	7.02314	182.621	22.3897	0.163096	193.043	101.404	3.25073	0.106885	33.6194	17.3129	69.0755	3.84014	5.13121	107.484	7.61809	25.6339	203.458	20.3061	9.82413	99.7353	0.681074	11.8646	0.857203	3.8176	13.2543	5618.05	0.731314	0.12179	21.8776	0.387748	3.63716	2.66896	407.742	258.109	5.18173	43.1046	27.8564	28.7663	118.875	5.10261	354.469
TCGA-AB-2921	0.0288154	0.00665412	15.8751	1.34037	0.00370988	16.8175	7.44464	2.04614	18.3364	63.564	29.6784	0.291981	184.025	141.91	4.03618	0.0247395	70.009	19.7742	140.91	3.30417	26.5546	46.7496	46.6806	60.6207	1.41963	20.9394	12.9619	10.5362	0.0921795	2.1753	0.724096	1.31534	3.91749	20.2714	2.59797	0.0166949	12.6495	0.049169	4.2928	0.735046	4.81971	11.5977	3.37908	51.236	35.5141	39.6818	46.7898	9.21147	58.2239
TCGA-AB-2950	0.473577	0.0345711	16.6658	2.45737	0.00884725	9.89615	0.342678	1.02183	17.3738	97.4748	16.8574	0.74456	131.504	74.5999	6.4876	0.0885441	48.8078	11.6645	77.1992	3.23731	24.1776	121.451	39.3853	6.19038	32.7057	17.7347	34.3182	65.4042	0.667677	9.72845	0.771685	2.31441	5.19353	724.363	3.44109	0.0934367	25.5897	0.175038	6.82561	1.911	61.0544	78.7429	9.27233	54.793	7.9123	43.0578	66.8328	9.74219	126.775
TCGA-AB-2981	0.0172941	0.0522556	11.2242	107.575	0.051197	130.261	220.071	2531.96	335.061	53.2513	46.8118	3.07159	174.379	32.4052	20.3785	0.0220393	444.584	14.4134	69.9128	78.7951	1341.86	265.851	230.787	50.1585	1.6938	30.5993	50.2209	109.269	0.230357	1.98579	0.773443	0.47588	3.6953	1.09241	60.2321	0.0894722	46.8194	0.188435	66.3583	4.41738	1.78348	22.3565	16.5125	605.551	158.399	65.5706	137.895	39.4821	35.2598
TCGA-AB-2900	0.103625	0.0268022	35.9872	16.8183	0.0131636	53.9235	31.2245	6.64581	71.1199	123.884	20.5517	1.00254	225.346	78.5344	8.99158	0.0408684	153.498	12.8034	120.505	9.18366	273.553	161.479	111.351	23.4989	12.0622	21.4476	29.3833	42.2155	0.170069	3.94632	0.832397	1.15321	5.78401	40.7997	8.42134	0.065665	27.8842	0.164759	26.5625	1.34886	18.915	63.9986	9.24412	131.964	22.8703	43.12	161.706	22.3378	103.749
TCGA-AB-2834	0.23591	0.0653935	24.9279	22.2176	0.0199317	36.901	7.03886	9.27387	100.164	120.117	28.2416	1.28792	229.96	59.9687	9.90589	0.102834	334.764	15.5397	52.8428	10.8044	487.479	378.668	121.686	19.1936	15.1209	21.6011	58.2282	124.808	0.801727	6.66767	0.754729	4.31947	10.3412	201.275	28.9113	0.100692	67.3176	0.348948	19.2406	0.450875	30.9187	142.264	13.1306	148.338	41.4681	89.1559	220.451	13.9961	138.967
TCGA-AB-2808	0.109422	0.0248083	12.2364	4.82934	0.0100981	13.961	2.46428	3.82256	31.5727	87.0533	22.3039	1.6344	156.96	67.3156	4.23853	0.0963694	123.275	11.9342	61.6608	8.15811	106.378	217.162	63.9415	18.3697	7.0991	18.3926	43.1506	78.6126	0.639636	11.4126	0.829264	3.01486	4.76617	257.467	9.545	0.0567553	28.2066	0.151379	14.5047	0.366379	22.0776	65.2305	13.5289	53.9859	18.2695	69.2246	113.14	6.89218	73.0503
TCGA-AB-2843	0.05506	0.0102214	11.719	1.90993	0.00642193	18.1092	9.52198	5.87461	24.8385	28.9421	39.5322	0.349846	310.093	90.3766	4.89539	0.0619036	39.9179	14.7252	129.13	4.28968	68.93	93.2985	13.9208	19.2848	4.26202	20.1077	5.87377	13.4309	0.0619575	2.15872	0.923335	2.87293	2.21557	40.3143	1.62437	0.0267206	15.9406	0.0416144	10.6208	3.62752	9.04723	21.2838	4.6119	38.309	18.0453	33.6389	94.1252	9.25204	44.9294
TCGA-AB-2892	0.420905	0.127976	34.9326	16.3997	0.0232956	22.6184	2.12106	2.68063	69.5242	147.525	26.6783	1.13384	174.468	68.2929	7.80494	0.0736758	109.788	15.7228	71.796	11.698	87.0024	165.985	98.6643	26.1321	31.9355	22.6429	39.1597	129.915	0.669811	9.45697	0.833559	1.86899	7.97352	813.285	10.4879	0.30601	39.5825	0.515726	15.5997	0.661629	71.0438	150.365	12.3063	169.025	35.5234	66.7556	135.294	12.1207	175.999
TCGA-AB-2941	0.275062	0.0165445	22.6492	10.7761	0.00417283	8.63986	5.84359	2.49745	1.90773	120.006	9.12198	3.23043	166.714	101.557	2.69016	0.17348	65.4707	13.3891	176.46	8.50924	295.637	388.754	20.8317	29.7232	56.8589	11.6442	19.7764	247.566	0.0910926	11.8966	0.692002	2.70876	19.1799	1745.51	0.0920765	0.0435105	15.6564	0.0503805	30.8569	0.0286302	50.8231	252.971	11.6648	50.2244	6.79635	19.8444	105.328	12.855	145.262
TCGA-AB-2810	0.0407821	0.0116298	8.17294	1.24438	0.00194176	25.9229	8.01169	1.05442	31.7199	118.07	10.9651	0.262855	167.488	106.268	3.80568	0.0203326	70.6573	15.1715	125.969	2.13608	39.8256	42.7073	127.216	12.4004	1.71133	22.9224	23.0552	26.7018	0.287915	2.21195	0.680722	0.522531	3.30339	127.916	1.18304	0.0136934	12.0327	0.142202	7.99697	2.40731	6.72528	20.446	3.90716	65.8083	15.2382	29.3376	105.212	16.8668	73.6142
TCGA-AB-2849	0.478999	0.0399314	205.185	1.41641	0.0825447	21.2713	3.15209	8.67488	23.5653	96.5482	56.3986	4.84562	257.494	149.519	3.32652	0.250767	119.936	13.7511	73.555	14.4881	107.272	199.851	18.6652	25.5635	5.97403	15.079	6.7697	40.3084	0.348159	6.41265	1.10193	16.8082	3.18848	578.353	6.82476	0.256219	27.4263	0.152738	23.8898	0.369167	52.7702	188.068	41.4348	40.8613	9.8637	60.1619	59.2025	5.84874	84.9468
TCGA-AB-2992	0.638006	0.0558558	28.7746	22.7047	0.0105523	16.8298	1.31838	3.01207	35.0199	138.574	22.933	1.24412	167.749	47.4137	7.88012	0.107651	94.9103	12.3491	46.2272	12.8571	68.4287	230.08	38.8634	8.3395	54.2121	20.7495	23.1295	92.3195	0.727083	5.89872	0.818133	1.72209	7.44431	438.005	6.65866	0.110103	33.5514	0.297216	11.3303	4.81096	105	136.848	9.06852	138.697	20.0493	43.9329	176.464	12.3971	204.36
TCGA-AB-2996	0.377013	0.034595	47.2151	8.48454	0.00895184	16.9198	3.1767	2.91856	31.5486	129.663	27.0803	0.945832	197.119	70.6002	5.71797	0.0829951	103.512	15.347	66.7832	7.54171	83.9596	170.743	47.6138	21.3632	19.237	20.6652	12.7598	59.3726	0.2679	2.91563	0.85661	1.94416	7.75628	457.813	6.1741	0.0945132	25.6736	0.142171	12.0557	1.44922	61.4333	107.696	5.6248	95.7545	28.6898	60.1181	151.896	12.5699	156.367
TCGA-AB-2933	0.323491	0.142688	24.1459	18.2025	0.042558	23.6421	2.99803	4.29795	125.484	145.244	33.3396	1.97776	205.655	70.4056	8.49406	0.135644	166.109	16.7395	76.8399	13.1842	179.677	265.774	92.3693	38.6072	28.8423	22.5334	39.7425	180.521	1.01137	11.2258	0.836159	4.68551	7.87272	725.631	10.1342	0.363925	40.064	0.427489	29.0147	0.595048	60.6026	184.44	21.1315	202.455	34.1873	66.4731	179.977	13.8521	142.473
TCGA-AB-2971	0.26305	0.0656056	40.2346	21.0285	0.0250687	28.8211	4.05215	4.45149	74.6393	152.827	22.9145	1.28633	173.783	66.1971	9.97754	0.0816767	132.917	17.4079	54.9345	9.97402	163.539	144.591	118.212	44.4036	23.2601	22.8582	31.9558	88.6619	0.393327	8.52565	0.845715	1.83101	5.53097	285.783	19.6894	0.156296	29.2877	0.243042	17.1621	0.70235	38.7551	145.586	19.4688	183.05	45.1378	67.263	123.956	20.461	116.864
TCGA-AB-3000	0.0197452	0.0117146	11.5801	1.27489	0.00674589	24.2789	2.76794	8.17828	33.3936	31.8537	7.18297	1.15866	146.72	51.3535	4.04682	0.0290163	54.4184	8.19817	84.3693	6.01098	175.433	81.8567	58.8671	3.16335	0.336699	21.6955	30.3926	19.0624	0.189316	3.62215	0.778361	1.13271	2.06902	43.4079	6.4007	0.0247281	22.6461	0.0614592	12.0639	3.66955	1.75017	10.5669	4.95226	30.4482	3.16218	42.2692	70.0179	12.0321	26.9927
TCGA-AB-2846	0.0366506	0.013271	15.3841	3.54518	0.00687058	36.0942	29.2175	8.34388	68.0625	45.3451	16.2746	0.787708	140.061	61.7399	5.93831	0.0157791	96.3134	11.4254	89.4718	5.71051	146.519	67.7503	123.648	9.84399	0.830571	20.7887	26.6214	26.0618	0.178767	1.91266	0.718181	0.416592	2.48646	32.3425	13.1991	0.0212671	22.7939	0.0840659	10.8922	1.57616	4.27544	16.5341	4.80998	90.6066	13.9349	43.8219	89.7829	18.3689	41.5103
TCGA-AB-2891	0.0255965	0.00745265	7.54303	5.27505	0.00563059	24.4767	22.8924	3.71156	61.0985	41.5911	14.6361	1.11455	246.222	58.4176	5.40383	0.021088	90.5076	12.1693	111.391	7.55298	68.2977	84.5013	56.068	17.45	2.72607	20.3471	10.9553	23.7286	0.094192	2.54434	0.795542	1.34417	4.07819	40.66	11.9214	0.0190138	20.9406	0.0549749	17.8254	0.960614	3.88013	25.4724	5.98261	56.8881	10.7828	33.1293	81.7983	13.9437	45.2681
TCGA-AB-2828	0.108198	0.0627329	40.8857	28.0057	0.0392124	58.0005	27.8814	31.8792	149.117	76.1572	23.1693	1.84937	168.309	40.6477	12.8647	0.0506393	267.073	11.2516	49.5304	13.281	429.097	274.413	188.037	19.6121	9.55039	23.4801	49.5585	113.01	0.306472	5.30044	0.799903	0.978622	4.5039	53.6318	52.7648	0.117843	54.7071	0.247112	21.879	0.551354	13.5682	59.614	14.6279	214.375	33.3516	103.538	212.707	19.6522	83.625
TCGA-AB-2939	0.0270095	0.0265628	65.1806	2.44566	0.0238043	68.2741	12.7825	25.4527	38.4689	20.94	9.98077	2.7607	138.239	74.3012	5.61538	0.0233072	77.2309	8.95867	85.55	11.5685	442.694	92.2885	77.0887	3.23691	0.226235	22.2957	21.7851	30.298	0.157691	1.70821	0.874554	0.687805	1.90308	25.5269	14.3302	0.0924027	45.1671	0.0520227	11.7472	4.86588	0.837539	9.80048	7.10594	91.2192	4.13702	45.5528	49.5014	18.4338	28.2255
TCGA-AB-2880	0.0527882	0.00686102	4.06951	1.24563	0.00478717	7.76998	0.562719	1.22245	18.4118	63.0616	12.0412	0.520027	178.903	70.4137	3.68904	0.0410712	37.3018	13.1578	91.2839	3.09873	28.0334	89.5726	23.8364	13.197	7.05833	21.1736	30.2212	22.6009	0.283362	10.3696	0.822097	1.29459	4.65542	147.091	3.04042	0.0225983	14.1155	0.0956969	7.97607	1.27905	14.4227	37.4349	5.49458	33.8313	10.9017	44.4723	86.451	8.19236	53.9726
TCGA-AB-2932	0.0504592	0.0261053	39.108	54.0117	0.0196258	130.65	383.459	133.688	299.548	110.824	21.3526	1.22582	279.645	42.5075	16.3288	0.0166913	359.695	17.5838	62.0051	33.3376	945.284	138.737	246.298	49.5992	2.75275	35.7783	23.731	27.4165	0.124431	1.32818	0.758687	0.441365	5.67456	2.52417	34.6071	0.0510802	46.3758	0.151311	34.5928	2.93609	4.75604	37.5587	5.41132	460.622	99.064	114.904	292.282	46.468	73.5174
TCGA-AB-2912	0.337864	0.155259	179.96	50.1037	0.0980891	84.9185	54.7827	44.5017	165.393	98.4732	39.8374	3.47727	250.693	57.1541	18.6414	0.0947927	409.716	13.7992	80.0967	26.6089	951.115	332.823	311.641	49.8214	9.07858	20.5413	44.8351	133.309	0.1999	6.86351	0.922159	4.74208	4.09978	268.682	54.3837	0.282164	63.125	0.207646	64.9235	0.0504938	30.2481	136.82	31.448	238.686	35.0326	136.397	227.653	28.3859	97.2956
TCGA-AB-2805	0.0762142	0.0320289	56.9909	25.3534	0.0697932	69.2126	190.778	141.347	155.613	59.5218	34.0984	3.08499	193.229	52.3277	12.672	0.0564039	297.115	12.0847	71.6829	23.231	1081.85	278.288	188.286	46.2263	3.93907	23.4905	48.6467	72.0471	0.142964	4.88382	0.83324	1.69903	3.30532	11.2152	33.114	0.0691548	42.4103	0.13379	56.8832	0.39383	9.4135	36.4191	23.1725	133.797	40.5711	97.8744	219.612	20.1268	36.4767
TCGA-AB-2886	0.0497092	0.00762972	12.0741	0.643549	0.00786626	11.0829	2.95134	3.34109	10.535	36.9054	11.1073	1.46978	138.193	87.1704	4.16083	0.0497441	21.2013	11.7489	101.613	4.31439	58.2385	59.3432	35.5056	6.74392	1.69465	20.7231	26.5945	19.5635	0.200627	4.30931	0.782288	1.10738	1.94217	98.3841	3.41834	0.0210257	16.7082	0.0543196	7.57151	1.93266	6.64682	15.094	7.15691	18.4298	5.16178	34.9504	34.008	11.0795	26.5303
TCGA-AB-2826	0.206892	0.0775818	21.3681	45.6423	0.0208925	29.9925	6.68978	6.01437	119.139	141.735	23.665	1.2579	175.806	53.7625	9.72418	0.070141	164.893	14.2518	54.7968	15.2446	182.081	306.69	144.531	27.8421	38.7222	20.9887	54.2814	189.095	0.782074	9.51994	0.717117	1.69679	8.80074	236.201	21.8816	0.173176	55.6069	0.44184	16.7108	0.736581	38.1126	148.202	14.4724	226.838	42.063	49.5611	347.61	13.1876	157.473
TCGA-AB-2844	0.0263932	0.00732752	10.6994	1.17411	0.00335511	23.995	5.17303	3.22012	20.3188	45.1222	9.64234	0.446213	126.192	57.1462	5.56436	0.0284782	59.2157	8.59973	65.2382	2.88157	72.4449	55.58	62.2683	4.07786	0.835278	17.7017	25.8198	13.31	0.14238	2.16024	0.683568	0.612389	2.17192	35.7111	5.08005	0.0111618	15.2177	0.046547	4.52673	0.74594	3.28231	11.3024	3.59319	41.0265	6.08742	43.7464	83.5919	12.7333	35.7223
TCGA-AB-2811	0.0187615	0.00482652	6.4399	4.94076	0.00195914	56.4086	49.3538	2.4274	55.8238	170.623	38.3687	0.111332	238.908	146.362	3.53693	0.00644824	113.485	21.2027	280.096	3.31715	45.9181	35.7342	84.0698	85.6052	1.68547	30.2139	7.85546	4.05568	0.0653221	0.365027	0.627794	0.246975	4.59705	3.34673	0.125395	0.00703636	7.29339	0.105861	16.7532	3.93122	3.75329	9.91474	2.45754	169.121	67.4005	38.1926	71.6526	30.3711	60.4225
TCGA-AB-2842	1.05305	0.0598155	50.0924	24.2526	0.016886	22.9072	6.98251	2.29129	81.8948	222.874	42.978	0.610066	179.972	61.252	11.3451	0.0682897	182.438	15.2209	60.6924	7.33824	103.167	184.827	66.765	49.8818	82.2673	19.8309	32.087	147.611	0.648118	10.4715	0.749014	4.40899	10.0846	610.098	12.6947	0.154879	44.4002	0.424294	12.1241	0.364841	177.202	308.145	9.43795	136.095	51.9939	83.2993	256.665	12.0049	219.622
TCGA-AB-2835	0.096462	0.0179732	34.4549	61.6821	0.0108202	69.8306	169.064	19.8345	199.371	102.24	24.769	0.760794	291.617	48.4791	14.7963	0.0203452	257.136	14.2412	89.2988	13.2331	616.696	137.42	193.645	44.1606	7.03277	24.8349	39.7314	39.4177	0.170211	3.79525	0.751515	0.567768	5.43008	8.82285	27.4559	0.0333414	42.9881	0.168028	21.0371	1.58447	13.9934	49.9876	5.98947	327.67	58.2323	55.4235	245.551	27.5514	118.262
TCGA-AB-2979	0.00902389	0.00637001	11.7156	0.280468	0.0028694	25.4819	0.810486	5.83515	3.07623	27.5214	20.4143	0.232867	330.533	102.657	1.8497	0.0316403	10.362	11.6126	123.202	2.1768	33.1488	59.333	8.765	3.27042	0.14656	21.3307	3.53752	3.42853	0.0856416	1.15605	0.986787	0.417895	1.42262	15.1174	0.173584	0.0225116	17.0093	0.0666574	3.5248	25.4166	0.826835	4.7024	1.91617	23.0176	5.56367	46.5182	21.6128	7.59879	29.1118
TCGA-AB-3001	0.0596325	0.0319502	33.5374	3.36449	0.00771926	54.1455	6.66461	7.93185	27.5136	63.7653	6.06846	2.38388	103.446	35.2195	9.41176	0.0272073	43.1103	4.72975	49.6189	8.21333	127.715	89.6039	64.4435	0.927814	1.93831	16.9293	23.116	28.4591	0.255032	2.61531	0.691576	0.541734	1.52062	123.343	3.22738	0.061153	28.7607	0.0654228	16.1188	11.811	5.10956	24.568	5.0065	76.4713	1.33207	35.7879	68.1033	24.3042	53.5302
TCGA-AB-2875	0.052442	0.0150274	20.3127	1.8362	0.0103805	22.8054	3.68815	5.68707	25.3959	38.5487	14.2784	1.9431	126.662	72.5847	5.41736	0.0459374	33.3414	11.5288	93.2457	4.91749	144.159	76.2377	58.1372	4.62066	0.77634	21.0746	30.279	25.9237	0.279667	4.12351	0.755708	0.691052	2.00998	110.413	8.79001	0.0413973	25.8986	0.0761917	8.94636	4.74348	4.31836	16.2062	5.68709	38.9543	5.90915	42.2149	45.2093	14.283	36.0473
TCGA-AB-2817	0.0125778	0.0102232	18.33	0.684568	0.0133619	47.5308	72.3981	10.6383	53.9049	14.0932	25.8186	1.81969	183.857	124.648	6.23805	0.0169523	99.5306	17.9129	160.807	3.79078	108.824	56.2633	49.9817	38.6531	0.328311	23.5704	11.482	11.1667	0.0519944	1.19843	0.869988	0.832335	1.83451	14.2172	3.37542	0.0296336	21.0564	0.0435755	27.7457	0.954427	1.41129	5.24281	5.08593	60.319	19.8087	48.4386	53.0566	24.961	12.9783
TCGA-AB-2825	0.067382	0.0237981	28.7526	48.2391	0.0213942	49.4277	131.083	49.0258	140.75	76.4449	24.5316	1.2328	223.498	43.1253	8.06837	0.0280541	166.869	12.7786	74.083	17.174	406.179	151.397	142.925	35.0239	7.07356	24.8162	22.6704	44.7445	0.113766	2.56453	0.780488	0.889984	6.05468	3.44295	23.3747	0.0488282	38.5456	0.103937	22.0637	1.37293	12.3322	44.3835	8.20058	240.518	45.3014	56.626	239.288	18.8855	75.8814
TCGA-AB-2911	0.55196	0.247387	70.1376	56.8928	0.0677132	33.9666	8.20066	8.52211	90.6751	135.738	47.4482	2.90108	247.901	80.0196	10.873	0.0927621	114.651	15.5139	87.7944	44.3606	196.436	220.45	113.789	48.1788	37.643	22.6836	27.1116	150.404	0.409612	8.79459	0.932815	3.04471	5.70686	467.647	12.4286	0.831553	41.8837	0.501348	38.3601	0.807346	84.6545	228.497	25.4131	173.771	52.3055	46.3568	163.051	15.8246	148.066
TCGA-AB-2919	0.0195621	0.00395447	13.5466	0.487589	0.00274014	14.3536	5.84085	2.92148	8.81836	32.729	12.7018	0.867044	245.501	158.51	2.45797	0.0329596	31.3521	14.3774	122.187	2.69846	42.7251	47.0074	38.3251	12.193	0.821564	20.4774	7.79734	5.50226	0.056875	1.14223	0.848676	1.25284	2.53596	27.6513	1.90937	0.00587899	9.15616	0.0146457	8.02219	0.713433	2.34248	6.2803	5.27172	16.1318	5.04016	33.2263	47.1606	11.6151	27.6202
TCGA-AB-2937	1.06144	1.72567	288.913	44.3767	0.23743	52.1444	17.408	8.27685	103.389	135.138	44.3931	6.2282	263.747	108.159	11.3956	0.162529	54.9179	18.1929	129.659	80.3729	262.18	218.034	170.593	26.0747	26.9598	26.174	47.208	297.372	1.6439	13.3388	1.01594	4.75427	4.81491	3069.82	8.71086	21.9374	65.5355	1.11487	37.3855	2.3156	63.4134	193.438	25.0818	146.889	31.1339	52.2321	106.106	18.3179	178.48
TCGA-AB-2899	0.0581224	0.0345108	67.2271	13.8331	0.0444291	60.2213	210.419	115.945	145.565	23.7426	34.8339	3.12411	255.708	69.6453	9.86083	0.0332973	187.036	15.7398	83.3853	28.7485	533.05	171.52	146.831	29.1257	1.45248	26.4239	8.58186	24.1911	0.070321	0.880848	0.75879	2.27725	1.92823	19.1673	32.3394	0.0572755	38.97	0.0366225	52.6994	1.66211	5.70667	9.39373	9.31219	130.126	34.7659	54.7115	64.338	27.4894	20.6834
TCGA-AB-2927	0.0933449	0.0346059	22.2255	10.0521	0.0146503	26.991	17.8114	4.84921	65.4603	45.5028	31.5874	1.19857	236.97	95.1595	8.72783	0.0391572	109.155	19.072	131.965	11.6729	79.1296	94.4246	55.0536	53.7676	10.5251	22.9178	13.4342	52.1992	0.122044	3.24455	0.820157	2.18249	2.93974	116.941	9.9381	0.0983804	29.9227	0.089628	24.9042	2.25097	14.1264	35.2023	10.9607	78.0326	36.5958	32.2764	78.2341	19.0505	63.4342
TCGA-AB-2980	0.519401	0.029378	8.098	1.52647	0.00563356	4.19084	0.0256593	0.379925	4.58158	164.754	12.5829	0.388545	156.658	58.0289	5.23461	0.161836	35.6286	9.46892	66.0525	2.75939	5.30701	171.024	9.39093	5.55771	139.937	14.7302	31.2138	78.8925	0.835285	29.9895	0.783269	4.74525	7.65092	2808.27	0.609207	0.111553	18.9483	0.19293	5.30909	0.915929	143.128	197.005	9.59217	35.8378	4.49985	46.1137	117.418	4.34313	205.032
TCGA-AB-2991	0.061333	0.0285233	9.44302	2.64787	0.00552726	39.5756	0.380128	2.41164	30.2501	67.2198	4.32969	1.40676	69.4567	22.83	13.1545	0.027252	38.3178	3.94424	33.1182	5.07275	75.2255	81.0012	71.7297	0.488542	2.26022	17.8824	68.1988	56.7348	0.861178	6.89744	0.546632	0.512951	1.74229	214.512	7.81061	0.0599798	33.1992	0.10904	8.63928	17.3605	4.27746	36.6705	6.89833	83.5319	1.2157	29.5393	57.4955	23.8704	60.018
TCGA-AB-2925	0.122514	0.0259277	10.8457	11.3822	0.00600205	23.5232	7.36549	2.2676	75.8146	125.115	16.217	0.336156	225.861	56.6145	8.84903	0.0390033	102.98	20.0199	67.796	5.03872	57.7833	83.1197	79.5873	25.3005	11.613	30.7954	23.8255	42.8205	0.217418	3.30628	0.739536	0.817864	7.1373	50.6752	8.00499	0.053179	25.2634	0.138093	4.21868	2.25769	18.0433	42.5172	3.74522	133.045	50.0883	80.9376	185.829	17.1712	150.552
TCGA-AB-3012	0.0997689	0.082258	61.182	6.72118	0.00773462	81.446	3.06398	6.23435	47.6435	103.71	7.84459	2.60609	70.5164	29.6559	15.7733	0.0206162	79.0278	4.89614	39.3959	11.6069	318.613	92.1205	182.779	0.781645	1.02604	17.4944	52.8448	87.1256	0.642636	3.65085	0.561098	0.426901	1.78855	380.805	5.22253	0.150943	34.5154	0.108184	15.8342	14.6492	5.01154	53.3672	5.84351	182.12	2.31046	30.3223	79.0083	34.3693	82.4217
TCGA-AB-2862	0.0782889	0.0181132	8.02713	1.21615	0.00380753	14.743	0.203063	1.04148	11.0673	79.313	5.34207	0.674467	102.727	47.1809	6.42132	0.0365704	20.0005	7.76129	65.2882	3.51158	15.1083	62.5747	40.4789	1.63008	5.45906	20.3892	30.8326	30.7742	0.388426	5.06234	0.621714	0.694051	3.15541	281.742	0.830372	0.0504052	21.192	0.0921359	5.42552	8.1396	8.77325	28.6659	4.41971	47.8967	2.56101	25.7229	58.666	13.1157	79.7376
TCGA-AB-2948	0.0464806	0.0175931	25.0193	12.8332	0.00895535	44.9765	38.6579	28.3947	74.2345	70.1186	19.7811	1.22815	226.284	51.0524	7.0533	0.0513403	172.927	13.3884	63.4029	9.40038	290.773	133.896	84.8756	12.149	3.70853	24.0124	19.59	43.4165	0.150326	1.95744	0.817487	0.524724	4.13422	25.2824	17.6352	0.0409915	34.98	0.11616	17.7749	3.49752	7.53576	37.0056	7.90012	148.823	22.8567	58.7911	200.159	15.5682	84.0512
TCGA-AB-2823	0.0947165	0.047463	25.6592	8.73301	0.016688	56.8728	3.29743	9.29065	42.3893	71.2619	8.57707	2.36812	110.209	33.98	13.6294	0.0265569	66.0857	5.54169	58.4775	12.218	316.276	157.354	122.033	1.67293	3.86922	19.5865	71.2559	47.2678	0.406669	7.44713	0.627041	0.590798	2.49004	82.1399	4.15416	0.107153	40.1218	0.113817	23.56	5.4609	8.50697	38.9599	8.04175	116.052	3.25058	41.3187	86.6148	21.1104	55.2773
TCGA-AB-2913	2.64758	0.0525478	17.5279	3.38062	0.00997872	1.56012	0.0210521	0.211119	6.71965	288.189	23.6547	0.442548	182.913	114.653	2.80392	0.227838	36.9801	18.8171	83.9597	4.22563	1.55136	126.449	8.80187	48.921	427.442	18.1356	21.505	90.2089	1.00294	29.5068	0.898265	6.38881	20.5766	8826.81	0.894994	0.275187	14.2256	0.343297	4.08747	0.191551	1086.6	397.496	11.9507	29.9708	22.8687	40.7628	136.82	4.03477	282.781
TCGA-AB-2987	0.225847	0.691826	68.3998	215.8	0.180443	150.624	122.618	211.921	393.937	162.004	66.4673	5.93197	168.903	52.2542	24.8497	0.0386166	789.081	11.9321	104.329	155.446	1205.69	1108.87	166.731	73.9909	32.0337	24.6481	16.2434	242.462	0.261107	2.63591	0.815233	2.26185	4.58007	22.6108	16.9855	1.02652	70.4938	0.502274	243.633	4.01037	23.3164	97.7966	22.8866	1608.67	96.4175	44.083	244.179	60.7916	148.673
TCGA-AB-2866	0.0316361	0.0242041	37.0749	30.4213	0.0227825	91.217	97.1321	55.3476	159.619	57.2734	23.9091	1.30564	298.262	65.895	14.3638	0.0226346	226.301	21.7451	77.2859	16.0257	478.201	113.465	252.623	49.4491	1.66394	33.5723	36.8219	40.3514	0.112517	2.66949	0.852797	0.541374	3.4643	7.60073	39.2095	0.0597182	30.495	0.0842142	19.8803	2.06013	3.50596	27.5748	8.42078	211.321	78.4519	90.9807	126.769	30.2808	40.9014
TCGA-AB-2973	3.20497	0.142926	18.0311	50.1938	0.0317527	10.1178	0.981319	1.6777	69.9171	305.723	27.4404	1.04878	163.768	49.2536	8.65372	0.135383	125.582	14.5012	51.4933	20.897	32.4212	343.827	50.7777	43.8997	452.58	21.8302	35.1969	195.026	1.25322	23.039	0.785706	2.76668	18.3064	1147.56	6.0759	0.402706	44.3153	0.667597	17.8696	1.06755	910.762	535.342	20.1507	186.076	55.4055	50.1037	360.707	12.6033	307.702
TCGA-AB-2877	0.0494865	0.00735357	10.7901	1.65537	0.00392256	13.7118	2.15452	1.20559	18.3178	63.6523	22.118	0.742317	219.497	145.788	5.53303	0.050529	41.7806	16.7018	97.5161	2.94371	19.4263	60.7898	37.2975	24.8285	8.29783	17.8163	27.2198	18.8936	0.217819	6.17123	0.776562	1.61344	3.17328	96.8778	4.91305	0.0126738	9.22159	0.0538105	4.72103	0.515376	9.11437	28.3041	11.9361	35.5126	14.0482	22.4203	64.298	12.3379	42.7743
TCGA-AB-2813	0.409175	0.0610238	49.3361	110.36	0.0207866	51.5587	90.5264	20.2583	179.896	103.886	24.2422	2.72386	194.751	33.5765	12.8185	0.070998	248.261	14.8925	38.2775	69.3705	1050.94	436.417	168.066	22.5948	23.7536	28.2841	36.9293	184.692	0.538169	6.22195	0.754468	2.31351	7.66406	156.05	62.9993	0.116307	70.208	0.290063	44.8375	2.26208	38.7102	210.333	11.3613	312.012	75.4791	81.0475	328.149	23.922	178.105
TCGA-AB-2999	0.615604	0.0430999	15.4115	1.40336	0.00383949	7.48285	0.0187259	0.305862	6.56248	214.853	8.48839	0.285442	86.6746	50.3019	5.71195	0.0817567	47.4801	8.41734	43.776	2.27164	7.91755	91.937	25.3446	2.77783	61.133	17.0535	33.3565	100.022	1.51939	12.0494	0.650587	1.0736	7.9878	3340.92	0.723619	0.141703	16.8337	0.25193	3.26528	4.71162	98.69	183.945	5.75911	74.7856	4.75915	28.138	76.945	8.45524	236.497
TCGA-AB-2841	0.190296	0.0575393	8.00703	3.11305	0.0057207	25.7585	0.00461095	1.62894	9.59406	153.646	12.4345	0.216599	105.711	25.0231	7.6136	0.0608991	17.9456	5.4336	25.5271	4.51488	41.8862	136.442	12.9992	0.308744	25.993	16.2487	29.8908	42.442	1.30254	10.7158	0.636917	0.530854	2.9819	409.155	0.658104	0.235243	37.1404	0.284564	2.47627	79.1636	17.2662	179.295	4.7749	124.836	2.21206	33.5257	61.6942	13.956	154.205
TCGA-AB-2888	0.0466434	0.0193134	20.0925	31.364	0.0170189	75.3233	106.894	51.6447	164.399	65.7594	21.9504	1.76002	133.923	39.6839	14.4016	0.0324136	410.099	13.6503	47.2019	16.2021	583.666	132.741	176.797	27.094	2.97527	27.2469	49.2191	93.3394	0.244477	3.51788	0.739364	0.347357	3.91341	9.30774	48.4432	0.0606667	29.1964	0.130724	28.1157	2.93657	6.35981	36.7992	13.5512	352.204	64.465	66.4676	127.414	29.6497	68.1372
TCGA-AB-2873	0.405427	0.121283	83.625	143.48	0.07511	95.2616	258.796	130.444	188.114	189.747	24.2433	4.16694	203.853	32.4009	16.1395	0.0705246	467.349	14.1424	37.4431	63.9601	1006.52	654.639	195.054	32.987	21.0708	29.0944	21.0016	134.762	0.257886	3.14411	0.811434	0.898233	9.07344	23.9228	64.7955	0.234966	58.3082	0.205418	55.8331	3.38025	51.816	154.861	15.5014	735.557	92.6312	112.224	295.829	39.469	191.523
TCGA-AB-3007	0.0513297	0.0305893	10.5124	3.05173	0.00521017	24.4942	0.346503	2.73413	19.1365	52.4053	3.9201	1.58052	60.0913	19.7919	8.6233	0.0305031	21.9151	3.23814	30.4096	6.1021	82.9763	84.8502	35.4067	0.316538	3.17625	15.1528	45.4708	39.7819	0.367433	4.23672	0.439193	0.604669	1.37628	200.113	2.56527	0.0365329	23.2	0.0426257	5.22519	12.9641	3.38878	29.0507	6.25771	48.8221	0.550065	17.8713	61.5494	19.0808	42.0691
TCGA-AB-2858	0.103309	0.0205192	17.6372	1.26439	0.00523702	12.8923	1.09825	1.1443	16.3111	79.436	14.2245	0.891666	132.831	79.4942	5.05332	0.049393	40.8547	12.5666	92.546	4.49004	13.6657	68.7592	45.827	10.9653	8.68069	20.2173	20.0897	31.2162	0.325388	5.61973	0.752983	1.14433	3.67475	370.171	2.21983	0.0534858	17.9153	0.139582	8.46946	1.63758	16.5845	30.7433	5.80617	45.5349	10.1115	38.807	64.5428	11.0171	85.1946
TCGA-AB-2998	0.0487736	0.0499172	22.1712	10.3272	0.0253352	93.5058	5.51044	32.816	67.6905	64.4937	4.4307	3.26535	110.491	23.5494	15.2738	0.0468574	92.9256	4.56872	47.1078	19.3275	605.682	186.694	216.623	0.650386	1.68247	19.141	104.302	88.1408	0.599028	8.98519	0.603438	0.953016	2.39969	44.9678	17.3784	0.181172	38.8131	0.0805586	27.4258	6.48712	3.08349	34.8051	14.1781	158.105	1.30495	32.3786	127.285	31.8569	54.7348
TCGA-AB-2840	0.361128	0.0349336	14.4124	5.27935	0.0129209	14.3161	0.197763	1.07564	19.3577	134.561	12.9928	0.792965	153.914	58.0251	9.47815	0.0972204	49.4356	10.322	63.1256	6.90567	27.5053	134.899	47.5086	5.71638	48.5579	17.0613	40.0935	100.964	0.6794	15.3274	0.700329	3.81948	5.42156	948.627	3.54281	0.219595	21.827	0.198102	10.0208	0.820839	57.1565	164.541	13.232	71.0958	6.94289	29.3695	104.047	11.7857	132.274
TCGA-AB-2883	2.78447	0.043416	16.2204	7.76225	0.00518123	3.18118	0.0497531	0.290791	9.55974	258.641	25.0072	0.190415	139.706	88.064	4.45644	0.0774262	39.2757	18.6571	63.6521	3.80784	1.9134	80.2606	17.3323	28.0892	139.246	20.9458	9.42427	130.606	0.403524	5.5642	0.650303	2.4573	11.206	4312.53	0.750758	0.121129	15.9257	0.297152	2.03622	1.1615	445.878	329.209	4.88171	81.9498	30.8497	32.0615	115.443	8.68699	331.388
TCGA-AB-2856	0.0266745	0.0123103	7.67658	3.37977	0.00333971	24.9889	5.14098	2.57856	40.0862	67.0355	17.3847	0.255649	209.317	83.8548	4.77857	0.0167263	54.5095	16.2056	138.217	3.94079	67.1154	62.0812	70.6337	15.6903	1.45295	26.2768	16.7487	14.8687	0.100499	1.77184	0.704997	0.390993	3.93515	28.2169	2.21442	0.024415	18.8543	0.100733	4.97743	4.36527	3.63749	14.0206	2.17125	93.243	23.1808	42.0476	98.6618	11.8251	85.999
TCGA-AB-2897	0.0635365	0.0501239	39.7562	6.96242	0.00692992	68.4053	4.13314	5.33209	51.5074	129.742	7.31728	1.63131	91.8	42.4865	13.4542	0.0287754	78.8564	6.64903	64.0344	9.5945	292.165	97.309	194.722	1.71435	1.13013	20.0573	67.0299	68.4479	0.673235	4.74166	0.628604	0.516932	2.71607	328.963	4.13848	0.108524	37.0372	0.170339	15.8427	9.5427	4.77802	46.2259	5.96805	143.018	4.47109	31.9178	103.128	33.8256	98.9369
TCGA-AB-2872	0.800565	0.0381259	5.02498	3.58619	0.00434634	4.85632	0.0220078	0.429969	11.1892	253.153	7.63578	0.377539	72.3491	35.2437	5.79459	0.0675049	22.6724	7.48817	31.0577	4.68877	4.61808	139.427	25.1542	1.16113	85.9357	17.2988	46.6229	85.9679	1.96144	15.1751	0.556683	1.00633	6.09364	2680.32	1.12653	0.0710701	21.0272	0.253285	2.68299	11.2406	116.222	199.785	5.44497	61.4631	4.70606	22.2891	166.615	14.0339	162.873
TCGA-AB-2994	0.0907832	0.0160066	24.8946	15.771	0.0143688	67.9732	4.10373	14.5162	45.8193	77.9708	10.8917	1.10607	127.641	34.7904	17.3817	0.0280438	69.0029	8.63227	30.8986	10.6359	373.025	164.891	99.9521	1.84504	5.15053	19.7634	59.6875	37.122	0.248695	7.42975	0.575223	0.481843	1.98298	40.1101	10.1346	0.0528327	35.9049	0.117013	12.2724	11.4773	9.70288	87.3962	8.88612	175.547	9.1715	27.657	100.374	28.9124	58.4866
TCGA-AB-2893	0.0786895	0.0400266	17.3452	48.0874	0.0151049	52.9248	36.5925	19.3832	170.813	60.0009	24.9808	0.608492	285.95	53.123	14.7661	0.0261691	206.16	14.596	79.4542	13.1801	316.669	140.34	182.326	95.8503	7.38812	23.4827	26.074	59.9959	0.161599	4.64026	0.647335	1.3212	4.52568	11.3959	43.8803	0.0815096	61.6142	0.16027	11.6386	0.940956	6.74814	55.2508	10.5675	145.915	55.2744	48.2487	184.794	15.5655	102.776
TCGA-AB-2861	0.105027	0.0107063	6.77519	6.47936	0.00376412	7.69791	2.59013	0.733778	23.9431	64.5907	15.5713	0.120503	213.607	70.344	5.95151	0.0329111	54.3679	18.3422	93.135	2.38113	2.22781	42.3459	37.166	45.8573	14.645	21.5281	16.0562	26.707	0.117278	4.05363	0.768657	0.708431	4.5595	46.8227	11.2872	0.0245435	12.854	0.0781735	1.33193	0.447016	22.6893	28.172	3.79508	51.278	37.3432	39.9076	86.6338	8.31405	75.9012
TCGA-AB-2894	0.0594896	0.0182669	18.3107	7.88474	0.0112641	28.4221	125.195	4.78724	51.2847	50.5719	28.8408	0.794683	215.292	108.953	6.17645	0.0293147	88.6448	14.8381	144.339	5.5476	40.8723	50.4867	73.7129	58.4734	5.45605	17.9723	12.9055	16.6902	0.089595	1.92909	0.861242	3.081	3.22322	28.4933	8.18165	0.0323344	33.2604	0.0665018	9.7981	0.196615	7.2035	12.6739	6.0688	53.1373	21.1279	41.7084	85.5296	13.7941	39.9395
TCGA-AB-2910	0.0371118	0.0143324	8.21783	15.8964	0.009296	21.3568	14.4894	4.97971	105.836	58.8216	9.14589	0.274864	290.134	51.0143	6.05485	0.0279187	99.937	12.4686	104.62	4.15183	39.4319	68.8013	83.0597	18.0436	8.26104	21.6857	11.7152	19.6983	0.0821797	2.03632	0.725126	1.21937	4.20986	2.81421	35.165	0.029928	26.6082	0.0607225	3.58169	1.55964	3.00248	12.8614	4.97722	122.341	7.78884	31.8088	149.865	13.3995	96.2897
TCGA-AB-2956	0.0195928	0.0109853	12.243	26.7616	0.00832524	41.8519	259.134	26.5335	112.95	30.3363	21.8284	0.788027	257.603	58.1772	8.09324	0.0133639	163.735	10.5605	148.432	9.34707	120.956	47.7616	131.755	37.4197	1.06796	18.6747	14.2097	18.955	0.0476347	0.984264	0.726571	0.479007	2.26182	0.843614	28.2414	0.0161743	25.1029	0.0244394	11.0861	0.576171	2.54284	7.86997	5.45452	99.9243	17.347	29.1016	74.0265	16.7993	40.5618
[truncated: 149 more columns]

## Sheet: LGG
	Camptothecin_1003	Vinblastine_1004	Cisplatin_1005	Cytarabine_1006	Docetaxel_1007	Gefitinib_1010	0vitoclax_1011	Vorinostat_1012	Nilotinib_1013	Olaparib_1017	Axitinib_1021	AZD7762_1022	SB216763_1025	KU-55933_1030	Afatinib_1032	Staurosporine_1034	PLX-4720_1036	NU7441_1038	Doramapimod_1042	Wee1 Inhibitor_1046	Nutlin-3a (-)_1047	Mirin_1048	PD173074_1049	ZM447439_1050	Alisertib_1051	RO-3306_1052	MK-2206_1053	Palbociclib_1054	Dactolisib_1057	Pictilisib_1058	AZD8055_1059	PD0325901_1060	Obatoclax Mesylate_1068	5-Fluorouracil_1073	Dasatinib_1079	Paclitaxel_1080	Crizotinib_1083	Rapamycin_1084	Sorafenib_1085	BI-2536_1086	Irinotecan_1088	Oxaliplatin_1089	BMS-536924_1091	GSK1904529A_1093	Tozasertib_1096	PF-4708671_1129	PRIMA-1MET_1131	Erlotinib_1168	Niraparib_1177
TCGA-DU-5847	0.0134672	0.0313932	29.0768	87.8809	0.0482308	152.229	106.418	336.468	238.468	61.6777	18.2866	5.91129	274.555	67.9258	20.8374	0.0183143	137.754	14.6225	160.193	138.913	797.85	211.391	149.899	3.49535	1.53223	19.1134	48.5416	28.6491	0.14378	2.31928	0.759437	2.95236	3.75742	5.34154	32.8346	0.0453736	32.8979	0.0464277	67.2573	1.25819	0.973068	39.0555	9.60629	170.621	6.44947	31.6886	246.487	31.1087	50.5256
TCGA-HT-7680	0.247975	1.4402	185.753	450.073	0.962598	106.004	186.505	606.518	332.594	184.98	56.0876	120.337	178.706	67.3498	24.377	0.249806	446.202	14.1691	112.973	4934.27	1045.49	434.058	131.632	24.9484	24.5787	21.7747	73.718	257.014	0.293692	4.06251	0.880473	22.33	4.44489	398.482	42.256	1.15433	179.34	0.0961561	94.8728	3.02964	22.2135	495.293	15.1554	465.827	61.365	68.6039	1271.84	32.384	123.304
TCGA-DU-7290	0.0459523	0.0312806	14.2668	16.5474	0.0208533	66.3462	39.0904	7.66668	71.2334	92.954	22.6657	2.67045	132.972	63.3649	11.1944	0.049552	132.264	14.958	78.6686	14.5513	146.042	196.862	81.2024	7.77157	29.0827	18.3789	51.8188	104.413	0.277928	9.48073	0.715285	3.56423	4.48586	23.246	4.39213	0.0447411	72.6056	0.203657	24.0182	2.02153	5.37646	39.3903	6.20717	111.85	18.1435	50.8186	546.654	23.2966	102.956
TCGA-HT-A5RA	0.00610429	0.0425497	31.6156	45.2797	0.0352571	331.525	823.507	127626	401.575	46.2199	34.4397	12.5861	272.821	63.2908	31.797	0.00979594	204.685	13.3508	196.722	377.767	1032.14	184.825	278.822	7.76285	0.0695246	22.2657	31.2165	28.3741	0.0275806	0.760776	0.760804	1.85568	1.17047	1.20031	26.5719	0.0741489	38.5546	0.00251804	180.517	0.851491	0.36557	9.17698	9.92418	343.456	11.2888	57.8767	182.449	82.354	16.4063
TCGA-DU-6405	0.379628	4.66544	112.925	317.412	0.156627	74.9495	30.1108	509.039	405.858	227.81	29.4139	10.6772	302.787	79.5685	24.9762	0.0815148	305.212	15.0824	131.253	1054.93	879.291	474.056	153.249	7.24955	7.79677	24.0934	79.5844	111.603	1.38021	4.78219	0.945036	5.44484	6.48507	277.497	22.3706	0.308598	83.0251	0.128538	61.3533	1.74809	79.2084	39.6981	20.2949	133.75	14.3348	53.9761	253.022	26.8846	68.1764
TCGA-TM-A84B	0.00987084	0.0401688	41.3982	12.8047	0.0382351	100.615	1148.42	7292.7	340.265	16.3862	14.1522	16.2272	247.009	68.9382	13.5201	0.056826	114.214	13.7809	91.2956	64.7303	161.494	113.198	159.354	5.40561	0.499939	15.5789	25.732	37.1521	0.0497722	1.37269	0.679152	2.91218	0.849679	6.80511	47.425	0.15156	48.0321	0.00681109	55	0.239183	0.28758	5.80891	6.1702	103.064	4.36002	25.0673	271.688	26.295	10.4116
TCGA-DU-8161	0.0917362	0.0358894	12.8643	66.1975	0.0305548	40.8291	0.259525	10.6035	55.1224	118.054	18.6234	2.27326	158.432	59.8146	14.5245	0.0897383	59.3337	14.9281	90.0165	44.9056	82.1657	234.512	50.262	6.83258	14.2729	18.3345	32.7037	52.157	0.354606	5.47497	0.701728	2.51535	3.44255	82.791	51.167	0.244084	17.2365	0.0232792	11.6129	3.88754	23.4053	76.7498	4.02104	126.533	15.2338	26.6386	170.126	20.9832	116.241
TCGA-CS-5397	0.288562	0.566351	411.412	120.238	0.239417	74.485	11.025	36.9483	181.28	305.441	36.7525	3.55808	222.631	73.0688	13.5985	0.109887	270.237	14.8363	113.773	74.8671	790.723	381.38	199.737	17.1961	25.5714	18.4232	72.0813	218.398	0.712489	8.73797	0.820255	2.99633	7.89265	332.396	17.1675	5.95071	122.575	0.205274	56.0371	1.68672	37.5484	263.588	14.4472	422.069	20.5568	62.1616	182.769	22.133	270.932
TCGA-CS-6188	0.0983912	0.288569	328.154	184.576	0.266643	104.463	62.9922	548.681	288.334	356.996	24.0027	7.23343	204.954	54.8295	16.61	0.0593411	335.56	12.9434	112.221	215.177	1653.76	586.593	163.054	7.96832	9.16989	18.7878	38.9919	204.018	0.228588	2.09994	0.668303	2.17068	4.9857	138.008	9.14976	0.81278	73.9214	0.0914019	135.249	1.23688	13.8146	281.014	6.49339	460.201	13.2809	56.6945	344.537	34.5831	116.766
TCGA-DU-7012	0.149249	0.163507	48.4031	138.998	0.124682	85.4124	40.6679	155.13	164.955	111.749	24.3891	8.58698	112.477	41.4558	24.1133	0.0346691	158.716	13.0019	75.5083	439.927	580.308	437.679	113.85	4.37868	3.28529	18.1339	23.2543	75.7561	0.394876	1.94907	0.624883	4.16207	2.48186	51.9587	15.0707	0.192119	60.7279	0.106121	40.5538	2.51956	20.6526	66.2517	6.44655	159.275	17.4344	31.5638	287.286	24.2842	60.8614
TCGA-HT-7860	0.0362252	0.0419365	82.4273	115.232	0.120903	48.3754	63.368	468.811	192.8	75.8136	16.551	7.25715	174.329	55.3579	9.14343	0.0432572	105.887	13.3831	83.7427	294.162	756.653	185.321	109.293	3.37525	1.15272	18.6232	30.4285	69.682	0.081191	2.38987	0.80658	0.905357	1.86269	21.9939	18.1094	0.462988	29.3297	0.00885058	86.3524	1.18123	6.04018	27.4284	20.7431	123.816	9.32305	32.2771	45.3908	21.2684	24.2503
TCGA-CS-5395	0.128971	0.235229	168.697	38.0671	0.17394	52.9285	47.895	64.7906	173.848	110.167	17.6758	16.3387	194.951	63.5605	6.78467	0.0983941	162.541	13.447	63.416	127.173	1397.08	409.522	176.157	5.90609	9.64244	15.8651	30.6543	190.835	0.299847	4.76124	0.798983	1.56109	4.19669	433.634	5.7072	0.737804	56.9396	0.0698276	52.7058	0.448023	19.3884	88.621	24.666	87.7756	13.8779	38.3571	105.969	19.8253	96.6286
TCGA-DU-7006	0.0459679	0.169911	261.151	114.935	0.228958	259.803	439.154	58074.1	649.264	266.156	54.9846	7.54454	216.539	59.5987	28.1114	0.0470213	314.501	13.4512	173.755	428.054	1435.91	1209	451.042	11.5629	1.93959	21.0565	93.1957	77.6464	0.0922805	1.95469	0.658743	0.367403	3.59151	22.6499	100.244	0.40263	101.707	0.0283742	233.443	2.21463	5.90045	73.5746	9.63178	1596.61	21.804	66.1394	459.233	60.8492	108.557
TCGA-HT-A5RC	0.0523589	0.15781	208.928	303.173	0.141831	109.612	31.3965	511.093	349.223	189.943	18.8594	6.36607	233.846	61.3181	8.81938	0.0246334	364.833	13.5285	148.586	856.007	1067.12	181.743	176.749	5.5836	2.27046	19.0179	40.4252	137.962	0.129386	1.36732	0.725831	0.603818	2.47124	75.532	24.212	1.13676	37.5979	0.0258082	110.957	1.32127	11.1511	73.1228	4.10154	348.065	9.68278	35.7475	91.2491	35.3634	50.9803
TCGA-DB-A64O	0.28084	0.0730018	12.008	137.573	0.0430564	23.0464	0.379437	3.06126	60.1889	295.678	21.9144	3.79558	196.841	89.5766	18.9353	0.434191	207.379	15.9838	102.115	91.4402	34.3455	201.421	50.1208	13.0129	106.76	19.2641	52.2872	76.8712	0.732078	14.0404	0.744422	7.87042	7.38395	187.432	40.9671	0.52062	27.8762	0.0527361	8.81828	3.19034	58.2462	187.402	7.65858	143.451	23.2545	27.9885	223.42	12.4801	245.349
TCGA-DU-A7TJ	0.00734886	0.103983	94.165	27.6004	0.0961846	70.3286	436.06	17018.3	229.058	49.6873	17.6297	5.11946	293.486	61.4975	2.65253	0.00678671	122.262	13.1552	134.357	120.016	1574.09	163.26	282.057	4.05188	0.136343	18.1992	25.3276	90.0177	0.10468	0.755065	0.708849	0.222804	0.968683	12.0107	3.04042	0.170014	29.9927	0.019398	90.0054	0.450895	0.452122	6.32306	7.76094	149.585	5.21367	45.8296	92.4524	14.0743	17.9868
TCGA-CS-4944	0.196232	0.341499	33.8031	4095.9	0.135244	122.114	8.33688	215.367	361.039	245.009	68.0403	61.9583	295.011	129.636	78.2913	4.3733	1811.53	16.9667	274.645	4615.37	548.409	724.576	129.551	100.111	34.1886	30.3389	276.823	257.575	1.04081	6.86403	0.686246	171.659	7.13817	403.933	1147.86	0.69346	118.204	0.02429	21.3076	5.50502	40.0023	1810.02	3.17401	1779.66	77.194	59.4459	2703.31	31.1733	446.239
TCGA-HW-7493	0.549358	0.191133	113.499	37.1203	0.0794206	33.7497	10.4895	8.55266	74.91	94.5324	22.5711	3.61124	160.677	64.0672	10.8919	0.129508	152.149	14.2698	56.0925	15.0218	368.274	352.525	70.3187	16.0461	45.2077	17.8821	52.6693	216.863	0.754619	18.5904	0.873206	6.9414	7.56189	941.846	15.9054	0.772511	80.2981	0.43068	28.5238	1.06051	62.2082	209.302	25.9897	134.027	21.6724	71.6325	258.458	12.6131	159.236
TCGA-HT-7857	0.0407184	0.230323	53.5214	6.84361	0.0807556	159.462	16.0452	80.8834	74.4523	124.145	50.8046	0.684938	143.566	46.0452	15.1218	0.0103316	50.0115	14.1646	121.961	40.9275	60.5097	214.883	138.675	17.0263	1.91001	24.3236	16.5121	54.892	0.267377	1.32363	0.772993	0.00533946	4.03124	8.18342	0.712095	0.226507	23.138	0.459151	38.3021	9.13578	4.65791	27.6796	3.924	525.614	38.8837	39.3452	147.7	50.6658	72.6808
TCGA-HW-A5KK	0.249833	0.0414393	5.7512	16.7167	0.00864487	10.3072	0.0662508	0.84665	18.2526	308.545	26.1634	0.4025	169.388	78.8669	5.62116	0.0612457	66.9913	16.4879	98.5114	12.0372	11.8517	137.803	16.9435	14.3795	156.952	23.7991	26.839	70.759	1.18925	6.2833	0.844297	0.736562	10.6354	254.946	0.309211	0.0757915	15.316	0.389711	7.75437	4.94903	78.9377	176.227	3.27101	117.311	31.4183	37.8222	145.697	14.2675	211.211
TCGA-DU-8165	0.00489452	0.00961509	12.9934	9.81338	0.0285374	99.6829	160.126	452.953	231.955	12.2514	15.3861	4.73138	249.931	63.2696	10.8428	0.0194934	122.55	13.8974	99.2388	14.6076	4645.59	273.835	126.079	2.54192	2.04335	14.4838	33.9829	99.1412	0.0967856	2.22864	0.84257	5.03691	2.79278	4.86553	30.9666	0.0140774	100.899	0.0502632	60.5986	0.43045	0.143353	10.1378	10.2676	68.9765	4.00531	50.9929	719.816	24.1722	49.4028
TCGA-HT-8104	0.0280998	0.665555	138.129	100.16	0.300012	132.176	460.606	8930.13	245.732	110.31	27.2503	19.784	249.3	62.2359	18.3557	0.0325956	296.709	13.5532	149.738	368.688	2464.32	244.798	243.608	7.58538	0.482294	19.0979	43.5117	109.969	0.0994294	1.96947	0.740662	1.39022	1.76344	22.277	18.1517	0.436094	64.5987	0.0217417	86.8733	0.747988	2.50467	30.867	16.724	185.128	10.7162	47.2946	246.33	37.5136	43.5016
TCGA-VM-A8CD	0.0348831	1.08707	66.5819	745.383	0.685664	382.118	72.5105	2056.12	609.123	283.424	43.0822	6.64916	329.668	78.7578	102.526	0.148805	419.697	15.9149	253.092	1415.7	1803.54	635.541	281.292	15.8595	10.3445	24.7819	274.332	110.015	0.493918	8.60778	0.977939	2.00071	3.5788	60.8976	190.942	3.12147	73.7498	0.0442049	134.162	4.47085	7.1497	225.108	10.5055	640.141	36.2199	46.5007	930.497	117.44	97.5464
TCGA-FG-A87Q	0.0470818	0.0479685	14.2097	12.5466	0.020933	27.0953	5.4756	16.5924	53.6117	99.321	21.4221	1.50497	147.988	56.0445	8.06253	0.0421158	51.1127	14.549	104.392	27.3727	69.7801	85.3033	72.28	9.53712	6.06205	19.1094	30.1289	56.1094	0.222767	5.09648	0.704482	0.57785	2.76461	39.3855	2.19025	0.223989	20.0959	0.0880784	18.7319	2.40723	5.62405	45.1671	8.04997	81.9919	21.6977	24.1601	128.253	12.2547	46.7148
TCGA-DU-6402	0.0157253	0.161276	34.5637	82.374	0.0347821	306.587	438.299	5292.72	819.089	250.053	36.2852	4.17762	267.342	58.6719	26.4323	0.0135149	352.133	14.1744	245.594	923.551	1007.44	539.35	469.742	10.1955	0.818648	22.5604	81.7361	52.1027	0.077147	1.82027	0.739221	0.158961	2.37814	62.1783	18.2546	0.329045	34.2277	0.0322602	278.757	2.96106	2.12869	46.579	3.43634	731.384	19.4817	50.3133	447.298	108.686	65.8999
TCGA-HT-7882	0.00950955	0.0239936	3.94336	3.59593	0.0215883	153.763	324.901	235.358	59.6706	149.253	128.099	1.01818	101.055	33.2799	17.9378	0.000296136	313.853	10.9639	124.05	336.159	70.0639	3271.24	17.4997	18.6986	0.320735	25.3101	7.22303	11.1918	0.0678055	0.0720767	1.00262	0.0429069	16.0321	0.0750904	4.85623e-16	0.0224415	10.17	0.190749	225.961	4.93543	0.863538	25.362	0.138788	4381.64	91.1492	80.9183	396.91	82.967	86.1404
TCGA-TM-A84O	0.0694727	0.00445251	9.81038	1.56534	0.00410696	4.98352	1.1699	1.62825	13.0975	47.6994	14.2359	0.481559	140.552	79.8342	2.71506	0.041477	23.4246	15.1428	71.6439	3.70412	3.63543	59.4298	31.3356	16.5636	12.8764	20.0027	13.3514	10.2047	0.0988353	3.1128	0.669278	1.14431	3.86635	63.2443	2.36727	0.0207874	16.3605	0.0509854	5.95162	1.22589	15.5514	28.2313	5.89788	42.3253	14.991	35.8575	56.1357	5.43988	40.1773
TCGA-P5-A736	1.02808	0.122039	10.0793	11.771	0.0128551	6.72672	0.0464403	0.621839	13.8319	328.225	31.3411	0.412232	174.464	83.4509	6.12034	0.113024	69.3549	16.6734	96.9688	11.5899	15.7006	173.686	18.6772	30.1018	278.553	24.9503	21.8378	107.409	2.08942	7.65001	0.879192	3.05704	30.6749	1160.28	0.160872	0.283653	20.7798	0.724462	7.06686	4.27277	254.974	341.931	3.14762	110.821	50.5928	39.2813	172.686	8.71017	357.997
TCGA-S9-A7R2	0.428005	0.0291494	9.39393	3.34224	0.00713871	10.0055	0.175849	0.520567	9.52176	247.597	22.9457	0.2561	135.849	73.6126	5.80595	0.0826834	37.169	16.1737	75.5765	4.37229	17.4984	146.515	20.6846	13.2181	147.311	20.3272	16.2455	52.9691	0.704585	9.10063	0.755999	1.13729	11.977	352.36	0.340053	0.0615306	17.9438	0.44966	5.6164	2.42869	68.944	159.053	3.52258	60.0425	26.9034	39.0698	152.6	10.5022	285.094
TCGA-HT-8564	0.0428806	0.0366308	63.5586	8.93316	0.0381141	46.0508	23.1092	26.6378	105.35	58.2559	15.6308	1.09382	190.636	66.5329	9.41967	0.032457	89.8442	14.4859	80.9017	10.6279	701.404	215.002	93.2782	8.9367	4.38682	15.3552	16.7332	38.4223	0.245014	4.91836	0.847271	1.97023	3.33928	60.4795	25.2624	0.313073	55.4287	0.0724798	20.153	1.50573	3.13336	63.56	9.00103	91.4206	10.3035	24.469	172.45	18.7404	66.5305
TCGA-HT-8015	0.607262	0.258725	73.5035	22.7137	0.0524004	20.7324	0.125591	2.16402	34.3516	201.966	19.0032	0.698632	166.764	63.7687	11.3049	0.138171	194.468	14.6985	62.7468	7.67088	54.9554	144.945	55.1292	16.0824	44.4994	15.6987	32.2093	181.711	1.57905	21.4082	0.783844	2.53922	11.4092	758.445	5.80327	3.45577	57.0394	0.754044	11.4883	2.50884	52.2567	202.071	17.6511	167.465	20.1328	27.8863	156.53	10.876	191.192
TCGA-DU-5854	0.197861	0.0834026	36.6276	28.4868	0.0290787	35.7733	3.28038	6.74169	63.1061	184.762	30.2048	1.17407	166.747	63.4895	9.02061	0.0516357	69.2663	13.996	101.67	24.4627	127.824	248.402	45.7199	13.1418	10.8263	18.9101	13.5207	48.0862	0.20718	2.22877	0.761514	0.640325	6.1436	92.9869	1.78633	0.155304	16.2091	0.147226	26.5504	1.89865	30.7777	125.896	4.52405	204.308	22.9372	41.2666	96.8362	18.5976	160.428
TCGA-E1-A7Z2	0.150408	0.116212	48.4362	40.612	0.0387662	21.9013	0.5546	3.47244	69.2541	150.37	22.4466	1.81353	274.427	96.4101	7.44775	0.158872	140.723	16.5328	105.296	27.5286	147.223	118.758	80.459	11.8241	36.9336	20.8297	28.55	73.349	0.550616	8.545	0.911906	3.01572	5.64725	126.986	11.6244	0.920851	32.5488	0.118792	16.3807	2.20211	21.2043	121.464	12.5454	99.6415	20.8365	26.9212	58.2971	9.4588	136.221
TCGA-DB-5280	0.128403	0.0216418	120.451	14.6133	0.0184003	46.8126	126.038	12.5264	74.6846	43.2173	38.6074	4.72602	243.796	114.865	7.81578	0.0488538	99.8638	16.0342	84.55	11.5824	492.497	230.35	63.7483	66.3341	9.21947	24.5018	20.6822	29.4801	0.0723189	2.49683	0.890582	3.59195	5.11777	140.853	21.6736	0.0338369	50.8124	0.0445058	21.9508	1.77164	15.4801	44.493	8.70915	83.0442	35.3656	110.868	119.347	16.474	72.6546
TCGA-S9-A7IX	0.0723381	0.069061	29.5253	17.0442	0.0267749	33.8704	1.82618	7.87692	52.9697	158.784	20.9971	1.32234	191.251	68.4205	6.6801	0.0481242	96.1375	14.9956	100.088	15.4537	74.4591	104.478	93.4874	11.01	7.32061	17.9367	37.5155	102.867	0.503967	6.91881	0.733216	1.46529	4.17938	96.0883	3.88652	0.279521	28.3574	0.17242	14.4334	1.89553	8.4847	68.6212	10.4987	149.142	16.1852	29.3286	131.085	14.63	123.879
TCGA-E1-A7Z6	0.304747	0.0835171	60.1543	34.0876	0.0779929	33.5801	10.9926	6.40511	98.0119	124.991	29.937	6.83834	196.531	94.1783	12.0028	0.248492	210.321	15.7812	84.933	29.1042	420.95	280.85	73.771	21.2167	62.8757	22.5343	37.3112	100.12	0.25028	7.73431	0.995217	6.9388	12.3634	765.613	49.34	0.867058	39.1208	0.107495	25.1424	1.94195	56.052	230.443	11.3527	109.823	36.0314	60.0543	199.498	16.0442	130.02
TCGA-DU-8158	0.417784	1.84475	76.0295	381.296	0.347407	77.3129	6.53375	21.6776	222.024	340.273	48.5676	11.4566	198.349	91.4774	43.1673	0.301885	367.362	16.2688	123.438	389.49	420.044	429.237	117.065	12.7515	32.1702	23.5018	58.6031	133.434	0.607822	4.7732	0.836342	13.3717	6.79505	134.896	44.6174	0.934936	97.2517	0.10876	25.9337	3.64953	84.4321	213.404	9.10263	557.684	28.7858	68.0799	420.489	33.7526	303.033
TCGA-DU-7013	0.0313562	0.0717466	88.5219	34.3279	0.0896519	117.363	338.721	766.868	291.532	71.4588	36.4345	4.06122	240.199	75.1056	6.44437	0.0354633	204.316	13.9294	150.656	32.008	2315.39	180.518	186.176	6.52685	0.18779	18.962	38.1384	129.396	0.11493	1.36964	0.703489	2.26974	1.34155	32.1359	24.4657	0.0718948	39.4397	0.0533991	64.3159	0.355619	2.4287	34.2162	13.2975	183.694	7.97463	80.3515	158.53	19.8673	42.7282
TCGA-QH-A6CZ	0.369835	0.00963522	16.5634	2.528	0.00393869	4.4318	0.162136	0.684163	7.91856	74.3024	12.0435	0.427984	136.328	78.1587	4.10704	0.135464	53.0318	14.9886	51.271	1.93682	8.89446	97.2714	29.9975	20.2123	35.1964	16.2885	22.0525	38.734	0.390206	12.7648	0.672066	3.73172	6.95939	524.181	6.64639	0.0503682	22.0323	0.153902	3.70581	0.859029	65.248	68.5634	11.4192	33.2348	13.76	36.7564	68.6686	5.32941	110.539
TCGA-HT-A617	0.270885	0.136402	12.117	46.5123	0.0397962	33.4765	2.16486	5.43593	58.1932	594.964	27.8086	1.49386	176.15	73.387	13.829	0.106771	117.087	16.0131	103.188	74.7517	70.186	518.843	46.663	11.7036	100.065	20.3371	39.6998	81.2392	0.980767	11.1214	0.820556	0.895002	12.3404	110.848	2.0759	0.415738	22.662	0.226323	19.0989	3.73954	53.3177	151.903	5.53973	221.175	33.4048	28.8598	607.326	17.929	280.087
TCGA-QH-A6CX	2.71135	0.0926148	4.08809	18.3341	0.0112239	0.204241	3.42932e-05	0.186865	1.08006	1414.65	26.2772	0.105949	167.258	84.0748	1.50104	0.379182	72.7338	17.1434	115.434	5.06118	0.124345	147.378	10.4566	21.2621	1404.39	21.9934	16.7575	128.112	44.9281	21.7911	0.739906	0.813904	22.5233	4620.17	0.0822821	0.348222	3.87002	0.554721	1.35296	5.73489	591.622	806.1	4.53621	65.5844	44.4557	25.6779	40.1579	3.24321	834.845
TCGA-DU-A76R	1.44916	0.0572455	33.6932	14.6006	0.0198663	6.59472	0.399649	1.24954	27.1955	165.755	15.1953	1.61607	133.59	83.5271	6.14957	0.379931	124.969	15.5872	54.1551	8.98293	32.0922	333.375	37.5865	30.8162	120.74	19.7917	31.2088	86.3589	0.494135	16.4888	0.786667	7.15429	19.5763	2641.05	13.4689	0.267983	32.5785	0.151895	8.24239	2.20176	179.339	295.95	16.9959	58.8033	29.1021	42.874	200.261	8.28252	238.253
TCGA-HT-8111	0.118254	0.0291596	68.4377	18.1777	0.0238123	56.4462	36.0511	14.8027	81.7053	69.3757	31.3113	3.18936	196.788	79.5991	9.70881	0.0679354	120.729	15.1715	103.924	23.7493	460.166	186.742	74.8848	18.9954	3.89965	21.5185	17.2608	36.1908	0.146252	3.00556	0.815048	3.12234	3.19272	108.336	17.8784	0.0722492	52.9588	0.0722292	32.863	1.81169	13.1762	86.9964	11.5812	129.556	23.6237	50.9024	125.682	18.8588	64.4543
TCGA-E1-A7YN	0.02156	6.8488	13.1387	138.201	0.405224	188.459	49.7635	13344.5	211.346	96.337	59.0872	6.20456	144.341	48.3216	65.8541	0.0275504	558.367	14.8148	215.495	2969.64	3284.39	264.715	96.7439	9.16972	0.504131	30.7319	16.374	73.785	0.522394	0.639971	1.13141	1.22453	1.89541	1.35588	2.8942	0.416349	31.7022	0.111801	119.261	15.1553	1.98366	14.3795	7.02449	320.139	53.2495	29.6354	108.106	54.4293	15.799
TCGA-E1-A7YM	0.14829	0.0441235	12.8485	3.38848	0.0116891	13.424	0.244536	1.12965	17.2361	177.264	19.3689	0.661381	179.764	83.5425	6.63483	0.117792	51.1809	15.8906	90.0323	6.94951	20.7549	89.7273	41.7118	11.1475	51.1401	17.6819	22.3498	61.4765	0.545937	9.28989	0.805822	0.765675	8.34058	210.755	2.20302	0.138976	12.5701	0.208538	7.25929	1.23494	21.8144	127.038	12.3036	67.2679	17.8233	24.9696	93.194	12.4677	139.343
TCGA-HW-7491	0.133423	0.0123985	59.2954	23.166	0.0120447	27.3333	135.651	6.76068	63.2353	44.4799	8.52661	4.80777	155.811	67.2762	5.6988	0.0768921	77.7118	13.4883	49.1882	6.87095	144.696	142.589	93.8781	10.6098	7.73939	15.2818	21.8034	42.0841	0.132748	7.79779	0.688892	3.82305	4.58078	274.96	18.7123	0.0440545	45.2026	0.160615	29.6422	0.383897	16.2406	34.6683	26.6475	58.3986	7.69439	50.2833	210.82	19.0529	44.1878
TCGA-TQ-A7RP	0.765063	0.982405	32.5376	194.48	0.676438	34.2444	5.61479	8.21498	65.136	683.777	26.5031	10.177	218.061	76.8649	15.2046	0.423254	198.236	15.4191	90.8694	229.304	303.605	359.642	75.9635	15.6695	108.202	21.1671	21.7873	237.015	1.00784	7.13286	0.873608	1.74856	16.0457	877.225	2.71158	3.98284	30.9481	0.293299	36.2913	3.81368	66.4169	242.969	12.7207	169.1	47.0426	25.5948	204.543	25.0676	199.054
TCGA-CS-6186	0.0292386	0.0315215	20.3146	56.2926	0.021409	51.2703	9.30061	42.3405	77.924	70.8991	21.8881	6.31772	285.588	92.2129	11.9196	0.0677724	57.7807	15.5598	88.4023	109.136	107.483	135.572	60.3772	6.35182	8.01198	22.9374	15.94	56.7394	0.111326	2.58053	0.742339	1.91294	1.82669	11.2917	6.06116	0.18409	17.1818	0.0212341	20.1488	2.13013	3.40387	26.3559	17.4047	85.1305	19.8098	25.7482	123.068	27.1174	45.301
TCGA-HT-7602	0.518125	0.0447299	19.4405	7.90493	0.0183419	11.2833	0.784337	1.40848	25	143.483	25.0049	1.36654	156.631	70.6556	7.42752	0.148629	32.85	15.1862	68.9544	9.99552	71.9915	158.736	31.049	13.9401	81.661	18.956	35.5502	84.5812	0.604244	17.8705	0.787504	2.25801	8.82086	1022.7	2.89012	0.165445	24.1478	0.248205	12.3435	1.33277	81.9299	282.638	13.9794	64.0086	25.4698	44.4487	139.978	9.373	131.961
TCGA-KT-A7W1	0.00704248	0.0739409	11.0979	5.80562	0.025437	84.7923	20.417	151.774	139.17	20.3207	24.2664	1.44514	348.427	79.8821	11.3672	0.00972703	49.6298	15.2959	213.83	22.9534	227.273	81.9434	116.492	5.87307	0.681498	20.2595	39.5119	45.2881	0.0853083	2.15607	0.900111	0.122895	1.44102	4.72889	3.22118	0.137836	15.3163	0.0125307	27.254	0.791901	0.683269	5.45221	15.094	56.009	7.43945	33.5493	48.0291	26.8997	9.37044
TCGA-DU-A5TY	0.024289	0.0161654	3.38274	7.39766	0.00902617	2.44148	0.734055	9.62299	23.6771	139.317	25.5984	0.478552	143.711	57.7601	0.391541	0.00698673	156.045	14.54	175.291	38.0419	63.6279	141.033	44.5325	6.39044	3.58787	19.1682	3.85587	40.4473	0.151875	0.296358	0.785018	0.121048	1.67318	7.65255	0.00868731	0.01969	3.28855	0.0533436	14.2769	1.27143	2.41231	10.7111	1.33053	106.983	11.4116	30.1209	45.1254	2.02359	62.3599
TCGA-HT-7879	0.0354139	0.00459539	14.6139	1.42272	0.00510937	19.5529	12.0074	2.7386	21.1185	24.3972	18.8585	0.710517	201.357	96.9914	4.06984	0.0189046	31.9878	15.6357	77.7916	3.89904	89.2329	55.3571	23.3458	11.1535	1.93593	21.5097	12.744	13.3584	0.0833776	1.74549	0.852437	0.910962	2.28652	33.0929	2.82769	0.0124171	12.3754	0.0434173	8.60623	0.87317	4.62633	17.8489	4.40186	31.8451	13.4543	42.1303	48.3261	14.5071	29.0565
TCGA-HT-8110	0.106434	0.0205668	3.90977	3.45104	0.0158399	6.40215	0.390823	2.55031	22.0557	123.384	13.1837	0.710782	109.19	45.2089	4.05125	0.0379296	36.9627	14.0627	66.332	18.6166	32.7064	179.718	28.7154	4.08726	29.6632	16.8666	18.0407	59.8896	0.949752	5.51455	0.695308	0.722781	6.3788	160.738	0.220296	0.118349	16.6924	0.181506	10.622	2.49987	29.9425	46.8805	4.39969	45.4101	15.0306	18.0788	165.258	5.1309	94.602
TCGA-DU-8166	0.0864907	0.0104167	43.4102	5.9725	0.00995017	24.8975	48.4335	12.183	55.006	34.4436	14.731	1.41773	148.005	68.1761	4.49511	0.0393861	74.5701	14.1158	63.4485	4.16527	326.404	98.5742	71.0932	9.45817	1.86544	16.9907	18.0394	50.6199	0.131852	3.07089	0.81584	3.14574	2.50014	102.869	10.7309	0.0297265	22.6422	0.0750729	20.3709	0.488439	10.0685	28.2919	16.0277	57.4192	8.86014	56.6734	78.1798	9.30373	37.1487
TCGA-QH-A6CS	1.35262	0.0189784	1.53973	23.8119	0.00575747	1.8949	0.000147355	0.182309	5.28589	577.796	19.4135	0.368548	150.449	91.124	11.6417	1.08713	28.781	16.9499	90.5701	6.56729	0.00218272	153.357	3.64067	16.2014	1718.37	19.7023	62.6001	113.627	15.8875	72.7968	0.620854	7.13176	29.2756	3284.24	7.29391	0.288899	11.8682	0.200659	0.721411	5.02894	715.002	1197.97	2.20988	76.154	31.5273	21.0155	418.138	4.97909	820.276
TCGA-DU-A76K	0.398783	0.132412	51.8929	12.0946	0.0213643	8.18152	0.0604858	1.24392	19.6498	260.901	19.1414	0.706092	208.583	85.4366	5.85555	0.210361	100.876	16.1748	67.452	8.59013	51.0685	83.8992	53.6283	14.1138	69.8951	19.2575	24.5105	189.39	0.838448	10.505	0.86173	2.86933	13.7055	1108.24	1.45352	1.13958	27.6564	0.240159	5.92655	1.98486	50.0841	188.388	13.2073	90.0736	23.6586	26.9151	55.9445	8.91346	263.335
TCGA-HT-A74H	0.556037	0.163032	33.8925	12.6753	0.0198715	11.7886	0.206928	1.04005	22.0949	384.83	25.4366	0.636629	162.189	81.2217	6.38319	0.141229	93.5889	16.2533	86.4374	16.1906	35.6532	129.568	57.6055	16.8739	108.897	21.1061	34.7777	147.429	2.28494	11.1953	0.83019	2.26796	13.7207	1123.59	0.529104	0.43826	34.7756	0.659448	9.89448	2.05924	70.1325	249.518	7.07306	115.886	35.6885	34.4527	169.251	9.64419	347.823
TCGA-P5-A5EW	0.232015	0.0404691	107.881	20.0407	0.0202468	37.2397	34.9523	7.46904	82.9665	62.6806	31.8684	2.72289	207.751	97.9521	8.19825	0.0644362	136.297	15.8059	88.1359	13.4533	335.828	189.968	54.2797	37.6367	12.6854	24.1334	24.6886	74.377	0.211749	3.42044	0.944757	4.9317	5.26773	342.603	9.16909	0.102793	37.4166	0.153989	22.6482	1.84713	51.0344	106.397	8.17897	103.624	29.2033	87.3492	122.961	14.3447	84.9712
TCGA-HT-7902	0.260469	0.0695392	57.1189	5.7663	0.0265981	24.9309	1.25585	2.30258	26.5319	87.5896	29.2575	1.16198	194.96	83.5192	7.8536	0.0966548	37.1156	15.7326	85.1991	6.84454	241.108	89.7783	44.5935	14.1957	11.0658	19.2739	15.0439	46.0647	0.27971	5.83718	0.876934	0.46131	4.57315	152.892	12.1027	0.201388	18.8476	0.16244	13.6994	1.5745	17.4728	95.5098	16.1581	88.1204	18.453	43.7484	36.0021	14.9495	106.48
TCGA-HT-8563	0.0503019	0.306754	91.6399	66.9272	0.186791	92.3566	30.1033	22022.3	205.819	90.9441	59.9381	2.41686	112.389	38.3804	14.2819	0.0114027	277.996	13.0985	98.3913	137.849	1832.06	3444.56	47.8846	7.43022	2.71808	27.5007	19.0811	150.827	0.187488	0.764719	0.872171	1.53396	5.32126	5.87637	5.8596	0.17052	39.2635	0.182213	171.51	11.3146	4.31015	62.4296	1.78867	1867.36	55.5332	44.7062	350.744	33.906	93.6368
TCGA-S9-A6UA	0.0194314	0.154124	125.947	12.4998	0.126625	332.765	720.31	1632.54	345.754	111.552	58.9795	5.9312	245.042	63.9379	26.2565	0.0235784	154.8	14.6501	149.193	139.008	539.716	257.288	331.141	17.9629	0.686922	26.2498	58.2289	49.6458	0.159306	2.04002	0.847757	0.144367	3.09512	11.9868	25.5921	0.245321	59.7029	0.209841	134.803	3.91998	1.4239	35.9233	7.88232	963.947	40.8205	54.6401	473.667	90.264	60.0427
TCGA-HT-A74L	0.247348	0.00699932	14.1809	1.81419	0.00576022	6.14554	1.00314	1.04678	16.0963	75.5792	13.4252	0.568788	128.106	92.4156	3.66546	0.0857921	57.7943	15.3137	49.101	2.47255	27.6176	120.485	30.284	15.6433	20.317	20.0791	19.3723	31.9464	0.275	9.08709	0.799813	2.94394	6.58011	427.714	5.0939	0.0284496	12.4993	0.0731641	7.89773	0.923728	55.1777	66.4408	13.2662	32.2717	14.9159	60.0684	47.9478	7.00902	59.9712
TCGA-E1-5311	0.0515935	0.04998	134.632	8.78426	0.016994	65.8071	138.624	16.5254	112.368	51.9752	17.475	3.45894	156.59	87.8339	5.43664	0.0487513	190.997	14.6021	81.0842	9.53783	294.532	91.3969	151.117	21.1199	0.454361	18.3004	19.9011	42.3666	0.0962402	1.70829	0.783963	1.95575	2.86591	92.8757	14.5535	0.119832	38.571	0.127137	24.6576	0.519292	5.69435	14.0316	11.1363	120.267	13.7238	66.2277	78.6651	20.7066	44.7462
TCGA-DU-5852	0.00146439	0.00194866	1.68609	6.52226	0.0181155	0.0131984	0.806616	22.4491	3.69588	96.4076	7.99099	0.277188	158.862	51.0494	0.00202978	0.00512326	89.727	13.173	204.751	5.70796	4.62211	27.778	88.6262	2.25826	0.265052	13.8246	0.718651	6.43912	0.194483	0.26863	0.458813	0.00134009	0.142479	1.46072	0.120842	0.00527003	0.0107312	0.00612705	4.0543	1.3156	0.0415336	1.95347	3.73597	18.1339	4.33513	8.93757	2.37163	0.368221	13.6835
TCGA-TM-A84C	0.015434	0.00983922	3.7318	9.24943	0.00770954	42.3742	27.619	10.2819	100.531	58.4955	22.5808	0.922183	172.583	53.8383	6.64304	0.00590656	56.9106	12.8419	143.978	20.2018	68.7622	113.596	58.2432	9.41735	4.51215	16.7422	24.833	34.7244	0.0538044	1.97332	0.745415	1.06749	2.25752	71.9919	1.31888	0.0626086	31.0123	0.0459261	22.2292	1.70728	3.8429	54.3482	2.42419	123.122	16.904	49.4913	358.886	21.7808	46.8001
TCGA-FG-6688	0.447518	0.253661	18.4561	13.3383	0.0172783	11.4767	0.0878606	1.19785	23.1187	424.271	25.6442	0.736546	158.665	71.0148	4.82489	0.0965511	132.821	15.7703	95.8524	19.588	78.8513	195.944	36.357	10.4555	67.9089	20.8925	17.8135	164.824	1.80214	5.04284	0.826944	1.40176	14.2816	1162.04	0.19747	0.407661	21.8408	0.44813	12.6167	3.40935	78.4022	272.393	4.40807	110.427	30.6614	36.544	101.961	11.6682	262.191
TCGA-QH-A6XA	0.158015	0.0167634	16.9193	2.83099	0.00829147	16.4393	3.15485	1.56297	21.8787	69.7045	21.2479	0.672894	175.158	88.3009	6.91316	0.0549589	60.2881	15.9217	81.4713	4.55216	70.9012	101.119	37.5211	20.4996	26.3044	21.4217	25.2404	47.6394	0.291801	7.89955	0.839424	2.08694	6.85888	323.627	4.54136	0.0500382	21.6376	0.160004	10.3715	1.07861	25.3957	59.1632	10.2099	55.1739	22.7128	52.6599	110.62	10.3978	79.3071
TCGA-FG-A60J	0.122446	0.015013	16.3197	7.03649	0.00806375	22.1431	7.01139	1.55561	32.9267	79.9319	21.1001	1.55309	209.629	102.105	6.06809	0.0572475	89.2884	16.5176	94.855	5.57367	100.889	88.5797	30.3093	28.7328	9.68817	22.8327	28.9394	49.9771	0.317693	8.70944	0.753076	2.83674	5.19946	281.927	8.74059	0.0439799	15.8602	0.110086	8.2748	1.89972	21.2473	77.4032	10.8414	46.0147	26.4887	45.0173	107.624	17.2767	79.0472
TCGA-HT-7479	0.180224	0.029085	9.86339	5.36025	0.0100162	11.794	3.08825	2.00532	23.4884	91.1841	27.8233	1.13234	155.903	70.6875	6.66995	0.0663174	48.3195	15.1212	79.6688	8.70806	56.1331	161.617	30.4115	17.804	51.1835	20.6099	29.7087	63.4851	0.313711	8.42901	0.835935	1.935	5.55876	441.586	1.43142	0.0526153	28.1567	0.241753	13.2647	1.45943	37.7937	112.601	7.82444	65.4658	28.2605	57.4125	218.908	9.12735	114.387
TCGA-DU-6403	0.103859	0.0947633	25.8877	10.0019	0.0281527	50.9289	1.01692	9.82542	71.6348	105.269	28.2899	0.808543	265.657	77.7512	6.92145	0.0466688	95.4819	15.4556	131.604	13.7462	504.309	207.384	88.8499	8.61444	6.13131	19.2767	15.2851	106.53	0.751493	2.90801	0.958052	0.676729	5.18946	81.6173	2.66466	0.25924	26.7549	0.612366	31.7984	1.27089	13.6965	50.2985	7.25934	216.318	11.5975	37.9451	65.3235	14.3572	85.8172
TCGA-DU-7292	0.159754	0.289439	73.4423	132.775	0.339615	10.0989	1.66861	17.6279	49.0442	227.66	13.9836	2.62103	207.517	55.0402	1.71399	0.160369	178.453	13.7852	79.1309	27.6277	128.948	220.243	129.93	6.50159	19.9022	14.6188	20.3503	166.185	2.02642	16.1385	0.632669	1.87876	2.51423	386.139	14.4965	2.40134	23.8151	0.25686	13.3259	1.62604	12.3411	145.31	24.2433	120.823	11.1582	22.3347	49.7223	4.96403	121.891
TCGA-DU-A5TT	0.183137	0.068226	24.8805	14.336	0.0150147	23.1697	2.24149	2.82969	30.5761	145.716	18.3324	1.37807	229.942	75.742	7.70638	0.0817478	66.9952	16.0855	91.6496	19.1529	222.748	173.544	66.0952	9.55259	56.8782	20.1845	30.5593	84.5522	0.344344	12.2621	0.886319	2.61829	3.45388	312.065	1.21498	0.0972598	23.6115	0.120068	13.1469	2.65162	26.6496	121.702	14.6382	51.5061	18.4934	38.2587	137.027	15.2867	137.543
TCGA-E1-A7YD	0.0650604	0.0113933	1.09423	2.6295	0.00859342	10.8124	1.07717	1.91296	25.5106	104.851	8.24582	0.669936	223.167	77.2075	5.05756	0.0422275	77.5504	15.4917	131.009	5.35551	51.8755	103.768	20.8446	3.39731	42.3385	14.2564	24.9449	50.3046	0.28929	12.8114	0.707826	1.38803	3.66593	97.0943	2.48019	0.0336713	6.67584	0.0287973	6.02947	0.767382	9.18242	46.3713	18.3097	25.1705	5.90831	16.2737	120.03	12.1678	35.3092
TCGA-P5-A72U	0.775702	0.0436392	3.1392	34.6241	0.00701302	4.75384	0.0095929	0.752633	15.6459	255.408	30.6683	0.542289	208.731	79.6907	6.02274	0.0653271	39.3604	16.558	118.519	26.1659	0.0224444	87.4926	9.83335	12.7165	187.391	23.9769	23.9184	63.0737	0.934707	8.91478	0.754884	3.28764	9.21877	381.656	0.107943	0.379351	7.39639	0.120058	3.08521	5.54261	346.273	209.296	3.08657	70.6235	30.2387	23.6719	160.907	9.61975	248.222
TCGA-TM-A84L	0.117992	0.0353687	71.4594	11.213	0.0178302	31.127	10.329	5.36905	31.4855	64.8133	23.3846	1.48781	203.92	87.4771	6.26935	0.0481025	87.4379	15.821	89.8998	11.5075	267.652	102.838	58.559	17.4953	8.60465	22.4247	17.3853	52.8011	0.160153	3.2536	0.863832	1.36814	5.14843	94.5525	4.23105	0.0729119	29.3184	0.106654	15.2956	1.8589	14.8101	65.5245	10.6102	67.3622	25.3467	41.3597	72.008	16.4507	70.7982
TCGA-E1-A7YQ	0.0138026	0.00419326	2.18868	1.21143	0.00445315	10.5663	2.27842	7.51822	13.7835	38.1205	14.4594	0.443331	135.238	50.5515	1.89912	0.0137912	27.5081	14.2686	102.029	5.71976	29.6278	209.147	20.6616	4.34058	7.72725	16.9289	11.4496	21.2977	0.140452	2.18468	0.580971	0.158231	2.11782	6.72711	1.2433	0.0124101	5.33133	0.0216977	8.32886	3.18798	1.92162	24.8972	3.12542	42.6109	11.3557	19.9116	54.5655	8.46982	41.9167
TCGA-DU-7010	0.0819866	0.0139722	37.1045	6.113	0.0117903	51.5284	106.176	16.3159	68.2351	16.891	21.0848	1.13601	232.436	76.127	5.59901	0.025062	106.03	14.7461	103.159	6.17499	919.78	112.596	59.6851	8.70158	1.00158	18.5257	20.0015	53.2074	0.133895	3.84902	0.917112	2.4703	2.20096	67.0388	7.50021	0.028772	38.6722	0.0968508	42.1835	0.312757	5.43108	23.3154	17.0346	81.9628	6.08798	58.8727	75.0601	15.1341	33.0646
TCGA-TQ-A7RQ	0.0360877	0.00957496	32.253	1.85425	0.00693525	27.7827	14.6112	4.51188	36.2112	22.9249	11.9786	1.12673	163.797	104.825	4.18723	0.0513025	90.6587	15.4286	70.2945	3.04461	51.4952	50.615	71.8034	26.3583	0.731156	19.9691	13.3159	14.6519	0.0762293	1.80787	0.78311	1.72662	2.41739	46.8927	22.0014	0.0277548	19.7228	0.0685474	11.023	0.7027	3.95252	12.6655	9.09303	49.679	12.2133	52.6567	43.3402	15.4572	20.5696
TCGA-CS-6290	0.0485917	0.0326459	10.2545	6.66853	0.0144998	28.1769	7.30484	5.89193	41.3098	71.8367	31.3539	1.33564	159.788	69.1591	8.84903	0.0468234	83.2123	15.4967	105.508	14.1101	219.294	113.002	46.3537	15.9781	8.27694	22.6104	19.5098	47.7203	0.237252	2.90843	0.862676	1.18714	4.51309	88.985	1.67044	0.0851771	28.2672	0.147566	18.013	2.79159	7.26787	50.9879	5.47419	93.8329	32.8899	41.0125	108.25	13.9636	53.4443
TCGA-HT-7854	0.116961	0.0800438	25.9452	40.324	0.0402382	53.277	14.5817	11.9153	81.1766	116.495	34.4386	5.71309	170.503	73.1713	12.6339	0.0543137	208.591	15.0841	83.5328	59.1209	349.049	202.607	54.8972	14.345	20.7615	21.6922	24.524	125.426	0.352799	4.84876	0.972161	1.75517	4.52866	147.571	5.47845	0.349527	32.9482	0.161832	24.4297	2.9092	13.0115	106.485	9.17129	159.764	48.4984	44.3333	246.561	22.5763	83.1017
TCGA-DB-A75M	0.127275	0.022575	14.6759	8.51171	0.0106786	16.2936	3.78393	2.02556	32.799	61.597	29.6263	1.20263	260.523	109.785	6.92219	0.063821	65.7412	17.0554	104.105	9.02124	62.0806	109.952	26.7753	25.4754	27.1499	26.6531	20.6046	27.6679	0.17012	4.54543	0.877021	4.21928	5.34738	141.674	4.56329	0.0562407	21.8433	0.068531	10.3481	2.70524	30.6742	81.3857	5.6837	42.1043	36.6131	48.0211	102.947	12.9515	72.2762
TCGA-VW-A8FI	0.183267	0.0140274	1.85291	0.663464	0.0035864	4.07429	0.00358715	0.377525	4.56595	250.28	20.1506	0.0573983	169.558	83.9107	2.25298	0.0264135	35.4065	16.7138	117.049	2.46478	4.71849	72.9945	13.6773	12.0623	119.648	20.7504	20.027	64.4265	1.2852	5.60827	0.765889	0.395354	8.85049	300.36	0.00467354	0.0549848	4.31811	0.419993	3.62272	1.8552	41.389	106.962	3.75794	64.6232	19.3362	30.7995	50.3134	7.17666	138.906
TCGA-CS-4938	0.784068	0.0116875	2.65574	1.72131	0.00558668	1.48846	0.23111	0.309373	9.27524	189.475	16.5958	0.36751	155.006	75.4431	3.48454	0.0930637	17.5891	15.9695	54.3949	3.00737	3.18876	361.011	9.88992	15.5037	1351.28	20.9061	31.3964	69.7479	1.05398	25.3299	0.80061	2.11143	33.4176	5562.25	0.169058	0.0514308	21.0439	0.457687	5.83336	1.92303	545.281	273.048	5.1658	40.3103	26.8498	50.7598	398.166	4.29292	335.198
TCGA-P5-A5F2	0.645979	0.0291127	12.3902	7.46637	0.0101216	8.20947	0.152043	0.704845	17.4683	143.926	20.7346	0.632382	196.195	95.2314	6.12907	0.172149	72.5923	16.7013	66.9245	4.25448	34.2353	202.344	20.4528	29.2731	221.299	22.3111	28.2863	70.228	0.825958	20.28	0.898696	3.94657	17.2183	889.568	9.31672	0.123912	22.2963	0.236625	6.69045	2.34684	152.908	226.491	11.4274	58.6087	30.1237	51.5389	121.674	7.17374	190.892
TCGA-HT-7485	0.672542	0.2938	221.211	51.2721	0.100085	41.9677	47.3644	19.9883	142.461	122.685	32.6267	13.9083	168.306	84.4966	13.7611	0.203283	196.42	14.9902	75.1385	49.84	933.793	444.542	104.376	32.8384	48.1199	21.1295	58.9196	216.441	0.510878	9.62221	0.85019	11.0794	9.00612	1820.89	34.5767	0.556498	79.8876	0.16172	40.7047	1.61277	69.4764	421.941	18.345	217.701	37.2059	77.0006	392.974	17.0667	180.944
TCGA-TM-A7C3	0.0828619	0.0134107	9.65198	3.52199	0.00999532	13.0072	1.02467	6.80042	14.2269	87.5246	16.5857	0.89466	186.344	96.922	3.37087	0.034234	80.6426	15.6282	100.33	10.0946	27.024	92.629	43.1577	9.39767	11.3649	18.7701	20.9232	48.6521	0.0918271	3.33105	0.584258	0.696728	2.94984	53.8832	0.532655	0.0378984	11.6181	0.00874807	6.46149	0.625141	18.9512	22.7082	5.67294	54.7373	12.3525	39.8528	41.5883	14.5205	44.828
TCGA-DB-5276	0.228154	0.525126	345.296	115.985	0.206861	93.0815	64.4599	68.8148	142.963	94.3239	32.3331	8.0008	187.084	62.8711	14.2141	0.068946	245.694	13.9682	87.324	83.2922	1561.92	292.662	156.609	15.0883	3.31873	19.1114	25.7023	110.634	0.208962	4.37145	0.844297	2.01637	3.07065	144.833	36.0832	1.11736	84.3187	0.183502	68.2412	1.74229	20.1929	75.4654	21.9367	244.882	22.5483	54.2353	136.162	23.8974	88.0078
TCGA-DH-5140	0.0111513	0.00693201	20.4851	2.45466	0.0128928	154.908	596.37	65.9511	231.629	16.6828	16.3459	1.68784	314.482	109.341	12.1462	0.0126715	102.206	14.684	108.72	5.01016	1676.15	94.4276	138.565	6.10922	0.0593981	18.7005	35.0645	17.2772	0.0741504	2.39294	0.752179	0.656537	1.2132	3.11187	34.2881	0.0205008	30.8554	0.0828395	47.8921	0.466833	0.474842	8.43576	25.1692	226.508	5.57263	33.4768	57.0492	36.3974	12.8399
TCGA-TM-A84J	0.00328779	0.00248212	8.21866	0.229958	0.00554509	102.466	620.757	41.105	87.1467	9.34972	13.1469	0.435033	282.374	95.8083	6.87432	0.00356727	50.7667	13.9961	112.226	1.68312	332.527	69.5133	95.8957	7.769	0.0290589	18.2455	23.7074	8.04392	0.0351409	1.22169	0.775381	0.173602	1.07107	2.44407	12.6632	0.00719767	25.7735	0.0396864	22.3408	0.0730572	0.19875	1.85909	5.0982	167.698	3.96484	60.6082	90.6113	27.1409	4.89185
TCGA-HT-A614	0.039189	0.0176156	49.8799	2.97819	0.0153464	50.8868	40.9529	7.20758	57.6618	42.6146	26.6068	1.21076	245.31	103.876	7.68319	0.0396148	93.0669	16.0524	95.1783	8.72329	389.606	63.1866	73.0786	17.6752	1.3457	23.349	21.6882	30.238	0.147809	2.73631	0.893624	1.0394	3.02919	41.1692	13.3534	0.0605484	28.2413	0.0830532	17.8073	1.12321	3.40086	28.1592	9.93744	68.5017	20.0736	46.7148	82.3077	16.0851	37.6283
TCGA-E1-5302	0.0828211	0.0392108	26.1537	11.3447	0.0185998	40.8724	97.6431	15.4261	107.1	78.6871	21.8584	3.64986	181.777	70.1018	9.14821	0.0531962	168.499	14.6626	95.2966	18.0618	366.316	160.111	78.1409	12.5674	7.29127	20.6702	22.2049	82.0718	0.23874	3.22576	0.801927	3.58862	3.77793	185.39	8.78638	0.140095	45.5567	0.18531	31.9224	1.50225	10.0326	90.2272	8.48873	134.002	18.5847	42.1782	248.065	17.2945	90.1424
TCGA-HT-A61C	0.00387379	0.016013	4.41336	2.38581	0.0154581	207.111	48.598	36.8391	235.129	62.5784	36.4991	0.740313	467.407	103.561	12.9064	0.00630429	198.135	15.7829	252.993	18.0778	388.399	117.936	279.032	10.3045	0.261475	24.4	44.4851	15.1697	0.0865423	0.935299	0.839601	0.0669777	2.96422	1.59958	11.1525	0.0389552	11.5209	0.0991697	48.4166	1.89995	0.197242	4.68749	8.36371	647.282	10.6824	36.1025	63.1526	44.7296	30.0775
TCGA-FG-6692	0.048691	0.0106631	0.870429	1.73723	0.00320673	4.81154	0.105872	0.987817	10.1927	141.61	21.2054	0.169332	217.061	74.7834	3.0674	0.00945019	19.078	15.6401	132.511	7.33588	1.07157	89.4838	17.0077	10.29	38.4154	21.8159	16.6719	31.1842	0.262521	2.95094	0.792664	0.29051	6.28685	71.2206	0.0027333	0.038583	5.24855	0.0989071	7.82577	2.13454	17.1499	39.7	2.83817	63.1728	16.1476	30.8796	73.8965	9.44738	104.519
TCGA-VM-A8C8	0.142881	0.0248551	48.5334	4.68374	0.0119302	30.274	11.304	3.63353	25.4768	67.0287	17.5957	1.66181	206.582	100.014	6.54503	0.046031	96.3898	16.3146	99.4261	10.0723	280.899	198.818	53.8012	31.1937	13.1363	23.6035	29.1002	41.8491	0.206396	5.39459	0.882877	2.08477	5.81218	238.992	7.71029	0.0528937	32.3221	0.147642	13.6627	1.80019	15.6661	57.7327	8.45523	66.3702	27.0963	58.3564	110.727	13.8756	110.415
TCGA-DU-7300	0.213154	0.127481	71.8225	12.875	0.026641	38.318	9.88671	5.89127	61.3091	107.192	25.5569	2.37909	169.347	77.6386	9.69665	0.0995036	216.898	14.9395	76.2213	11.9981	185.72	166.754	110.524	30.6906	6.87526	18.6736	25.7496	96.9692	0.379277	7.18165	0.818152	3.91588	5.86828	350.946	15.4278	0.48942	56.1688	0.343894	22.1686	1.17574	29.6169	74.1187	11.5152	122.283	23.1149	55.1078	153.812	15.7682	123.948
TCGA-QH-A870	0.702081	0.0246867	25.9528	8.95941	0.0112308	8.99782	0.456062	0.956015	20.9578	151.753	20.1735	1.20357	184.606	96.2682	8.1419	0.244505	74.9849	16.3721	72.1231	5.26377	73.3956	217.76	26.4203	23.3574	274.649	21.4012	32.3994	53.7151	0.533584	12.3247	0.884845	4.75437	25.5877	1110.83	19.9764	0.110909	24.1236	0.117726	7.67444	1.495	136.479	322.253	10.3735	60.5795	25.722	58.6638	117.421	6.83719	234.731
TCGA-S9-A89V	0.0542401	0.0129081	208.987	12.2551	0.0213322	85.7942	81.4958	43.3226	54.8173	41.9218	14.6589	4.80097	138.918	62.0496	10.875	0.0428092	60.9115	12.6263	54.3675	21.1693	205.688	136.567	104.885	5.0891	0.395814	14.4906	10.827	27.7037	0.0707161	2.1066	0.632057	0.493661	1.75081	16.1928	25.4645	0.0317806	33.0339	0.0441877	24.3469	0.500157	5.13147	32.7849	14.1406	99.5698	5.9614	31.2037	68.757	36.873	31.996
TCGA-HT-7880	1.00187	0.146666	54.6488	9.19922	0.0193858	8.40037	0.0202907	0.716872	9.49258	187.942	20.4268	0.376529	171.022	75.0365	6.53741	0.218549	57.5732	15.8121	61.1742	3.61701	22.8511	91.0863	29.8758	21.1204	62.2122	17.9341	29.8212	155.429	2.10384	30.1369	0.871901	2.43723	14.8588	1581.16	5.65869	0.933803	24.7602	0.658365	4.45085	2.02097	94.0267	252.024	15.5785	77.8675	25.0935	33.0477	66.6604	7.17064	269.002
TCGA-HT-7469	0.00825482	0.00318138	40.6522	1.73886	0.00500208	131.242	1316.99	208.525	104.141	7.33859	8.53934	5.70344	230.756	100.226	3.54344	0.00515714	151.55	14.2399	107.982	15.1498	1791.56	98.6618	76.2047	5.24783	0.0181713	18.3936	7.10214	11.6576	0.0163743	0.261094	1.02148	2.58837	1.36497	14.2073	4.26454	0.0028273	27.223	0.0231008	47.6424	0.0923023	0.421595	5.52932	5.74392	38.6152	2.77255	59.3729	139.957	45.5959	4.07607
TCGA-HT-7873	0.0615239	0.00842985	98.0957	7.95507	0.019061	53.7325	54.4774	25.5412	50.9065	23.5697	20.778	3.21799	197.586	94.8934	5.24679	0.0236095	93.1891	15.3416	73.9829	10.4148	634.479	81.948	52.4803	14.3245	0.462052	21.5468	13.2119	11.5404	0.0544376	1.29667	0.873481	1.28065	1.75086	16.5688	6.537	0.0175557	28.659	0.0123477	29.1086	0.763568	6.09252	23.3501	12.9523	53.1814	13.5046	50.4864	42.7376	19.8845	9.69471
TCGA-FG-A70Z	0.0727875	0.0511618	17.797	24.0743	0.0235616	32.6877	5.00509	13.4865	69.88	92.4229	16.6626	1.38361	195.417	61.3827	8.44761	0.0349759	87.9691	14.4407	112.309	33.0026	115.109	103.636	81.1403	7.48528	4.34056	17.9949	25.347	68.2367	0.329862	4.77449	0.625342	1.84644	3.26875	58.4277	3.35137	0.188804	34.1278	0.103477	18.1005	1.92731	8.89138	46.6026	8.97698	101.549	12.6039	18.4153	112.11	12.653	70.2658
TCGA-S9-A6WG	0.0680497	0.0139918	5.6385	1.03561	0.00417988	14.0675	1.03469	0.623924	4.58451	77.8714	28.3769	0.277141	177.575	77.3171	3.64382	0.0105297	50.2959	15.603	100.796	3.27357	2.91524	56.6502	14.9994	14.7809	18.7261	21.8257	26.5489	28.6385	0.274628	6.74448	0.97376	0.42123	5.01655	62.6823	0.0395865	0.038647	7.50421	0.129864	5.08864	2.33983	15.3037	52.2027	7.24215	41.9174	29.8409	46.1746	43.2672	11.1831	97.0949
TCGA-FG-8188	0.0805808	0.013829	21.7698	2.83607	0.00762504	22.9972	39.5108	3.62095	31.1254	52.6193	22.7354	1.19487	177.293	83.2205	4.77192	0.0323478	52.2651	15.2974	78.7523	5.23703	154.507	89.8346	45.0355	20.5587	6.05632	21.2227	15.5292	31.9427	0.133064	3.48903	0.8402	1.47089	3.05079	110.868	2.58835	0.0218284	21.0468	0.0920501	17.0676	0.765523	12.2401	31.2736	10.2901	42.046	20.642	63.8168	84.865	14.2804	56.2013
TCGA-DU-5870	0.0981208	0.00579815	7.24236	0.571012	0.00195571	6.74212	0.354797	0.669655	5.03697	62.4146	14.8462	0.262778	171.227	97.9636	3.90538	0.0448729	27.8212	16.2203	83.0325	1.83466	1.86272	61.1964	25.4827	29.3137	8.60043	20.9949	15.0019	9.28024	0.135528	4.0659	0.646443	1.25328	3.69636	131.518	1.95086	0.012272	13.7295	0.0835466	2.97822	1.01475	30.3904	24.8486	6.30403	28.5096	16.3104	39.7474	53.7311	7.63151	62.301
TCGA-E1-A7YL	0.0230708	0.0203652	24.7989	29.4074	0.00652515	61.7804	13.1415	73.0414	102.29	126.881	15.956	0.921761	203.028	68.5832	10.6851	0.0228177	311.985	14.671	162.19	34.7584	908.232	57.0865	74.8898	5.24033	0.463235	21.0883	10.0106	31.3044	0.111096	0.467966	0.711139	2.30729	2.25975	3.79486	1.59464	0.0265279	12.7998	0.0383178	27.9698	2.28672	2.52151	22.4345	4.12245	163.542	9.9484	22.4128	38.7171	34.4492	63.2743
TCGA-FG-7636	0.145306	0.0146526	16.7377	2.32823	0.00401336	19.733	4.17802	1.38316	35.0955	88.2005	23.6709	0.581055	215.511	104.256	5.249	0.0412889	71.5281	16.5179	91.4249	3.62984	54.7892	105.836	43.6691	33.4426	18.9625	23.1654	19.7573	24.7462	0.248048	4.24974	0.784704	2.00369	5.0258	324.042	3.53847	0.0292065	24.9249	0.175569	9.90477	1.38534	32.4707	78.7127	5.37422	79.8376	23.5677	60.7308	110.472	10.8896	136.001
TCGA-HT-8108	0.108211	0.0074387	6.8047	1.12531	0.00506835	8.58831	1.75486	1.64159	9.8776	48.0235	16.6839	0.491194	154.301	73.9976	4.05618	0.0370777	28.7148	15.3041	58.4193	3.03041	31.8994	120.609	16.1644	10.857	17.511	19.5346	16.8001	45.9018	0.333626	7.43197	0.865885	1.11747	5.04677	252.994	1.88582	0.0167847	14.8996	0.106084	6.60931	1.25322	25.4394	39.0191	7.47725	25.9636	13.9855	50.6778	71.432	6.80359	52.4184
TCGA-DB-5273	0.102817	0.0757341	88.4074	50.9765	0.053601	82.4419	558.219	98.3328	166.254	64.0413	45.1183	7.44233	256.987	78.9198	15.3951	0.0376123	157.027	15.2252	140.155	78.727	1007.47	209.248	123.213	18.4256	2.76801	24.6926	22.1155	28.6939	0.101164	2.10319	0.786976	3.94524	1.85807	63.4947	9.6325	0.172489	62.9774	0.0505493	78.1115	1.75902	16.0938	42.2107	10.4864	154.723	27.0027	64.5125	243.132	25.3137	52.7975
TCGA-HT-7692	1.14488	0.0044459	1.02138	0.482049	0.00183646	0.316014	0.00286078	0.122891	1.17122	159.552	12.7028	0.0762344	141.434	91.6422	2.09292	0.0745176	10.7959	16.8905	47.8411	1.26234	0.00586621	108.804	4.41885	31.4679	823.461	21.983	23.8006	22.5668	1.08808	41.1312	0.730696	1.83393	15.5392	2747.23	0.0580466	0.0211927	6.34299	0.212614	1.56206	2.01619	934.968	181.433	6.32454	14.8123	27.0544	48.463	95.8573	3.23985	185.274
TCGA-P5-A5EV	0.512245	0.0167508	26.9173	5.08789	0.0045212	8.56771	0.396376	1.11277	12.9446	135.873	19.2348	0.380155	193.704	86.799	5.1724	0.128239	40.9085	15.9608	72.1817	2.66882	45.3114	134.814	32.8619	27.4813	77.8865	20.0434	28.9298	37.0883	0.424561	14.9908	0.745178	2.23426	10.9042	720.838	9.95408	0.0345528	18.4327	0.102556	4.1817	2.06871	105.383	131.851	8.37266	58.9759	24.7	44.6054	116.405	6.47992	189.092
TCGA-FG-7643	0.762386	0.21063	67.4013	44.6371	0.0433525	25.6799	0.307587	2.47363	34.2944	203.981	21.54	1.57254	175.194	66.3593	12.1485	0.272982	107.438	14.8099	65.8414	10.0239	70.2337	145.301	64.767	14.3666	29.918	16.3245	33.1717	201.03	1.18675	27.7437	0.770417	3.17101	6.68861	693.262	23.3319	1.72803	38.033	0.439367	10.6646	1.83128	77.5676	223.505	25.0921	137.572	19.2286	32.2028	115.034	13.9647	233.959
TCGA-TQ-A7RO	0.160482	0.0533343	229.867	15.4714	0.0376052	28.1438	5.65584	8.47748	69.1365	55.2011	20.2944	2.37041	168.845	93.736	5.6703	0.0824429	130.215	15.2511	59.1778	7.82104	120.599	91.0067	78.3495	16.5129	4.43481	20.3467	13.3998	45.9934	0.127826	2.34574	0.899921	3.28509	3.72249	137.619	21.6525	0.305799	35.1432	0.0691396	12.4325	1.05867	11.6014	30.7665	20.8531	109.261	17.4976	64.5629	33.583	12.1461	50.1344
TCGA-S9-A6WL	0.2316	0.0179581	13.788	3.65348	0.00764063	8.3703	0.569406	0.890667	12.6733	111.337	13.547	0.513395	142.94	68.7715	4.92109	0.0741372	65.7305	14.5385	56.0158	2.96603	5.51747	111.466	35.334	16.2652	32.5945	15.7047	29.6542	53.7829	0.496995	16.8254	0.775239	1.9608	9.22582	586.881	3.62035	0.110772	22.2993	0.245278	5.60808	0.891489	39.1947	56.1213	9.25819	56.8944	15.4383	34.8685	128.887	11.3968	134.068
TCGA-P5-A5EX	0.18056	0.514256	544.259	204.276	0.360548	231.45	614.818	5189.65	458.785	306.79	69.8261	15.929	193.492	68.4575	29.145	0.124871	708.797	14.4808	146.651	864.835	2096.41	1427.66	360.563	25.3368	7.0353	24.5893	48.2377	70.2712	0.115311	1.68086	0.711038	4.62333	5.48173	80.8582	63.1653	1.98773	104.596	0.0497227	176.824	5.2663	18.4385	161.028	6.46082	1263.39	56.917	63.3546	1055.74	52.6002	144.441
TCGA-S9-A6U0	0.0434461	0.0320184	3.88797	6.22892	0.0156818	26.8885	2.77674	13.1487	42.4199	119.772	18.5364	0.612844	179.983	44.1528	3.24401	0.00572699	74.2633	12.8654	111.478	47.4744	25.4552	73.3264	48.5466	4.97181	4.21094	17.9152	26.0497	30.428	0.338923	3.6658	0.688803	0.300699	2.06305	18.5415	0.00408483	0.164293	11.636	0.13688	39.6257	1.58287	11.2124	23.2209	3.581	109.644	12.3391	27.4042	51.9642	10.2621	35.081
TCGA-S9-A7QW	0.0267227	0.0114062	36.3597	0.79098	0.00477538	44.5141	73.6775	6.74666	42.3029	25.0311	18.7846	0.968796	213.189	96.4396	7.09429	0.0300355	54.6746	15.8763	102.001	3.83526	200.938	67.3316	108.671	26.2742	0.808289	22.6819	21.9077	20.781	0.0994862	2.80977	0.867054	1.11335	2.60302	65.7823	15.9823	0.0200937	31.8507	0.0857397	15.7244	0.592207	2.57947	17.7722	11.7981	42.4176	16.5397	52.7681	92.78	14.1115	36.7986
TCGA-DU-6406	0.00234951	0.0515179	38.8898	9.29627	0.0699375	217.623	289.709	8278.19	387.351	17.1002	38.7641	2.28733	401.973	84.9939	13.4009	0.00517824	60.5814	14.7003	205.82	33.8784	1344.65	83.9021	226.452	6.56683	0.0748182	23.1768	26.7414	32.8619	0.0301945	0.713444	0.772004	0.0722636	0.738288	1.78484	8.2616	0.109476	37.677	0.0130467	89.4692	0.971141	0.115937	4.33338	7.25402	158.409	9.647	60.946	29.0619	52.9462	9.18975
TCGA-RY-A840	0.103013	0.0134223	79.212	12.5592	0.0134965	29.6175	88.9297	8.16785	99.2144	88.1152	25.4832	3.0784	245.678	126.267	6.5898	0.0843696	189.994	16.2697	93.5881	11.5849	400.826	192.445	161.087	53.7584	3.60022	22.227	33.0164	12.5925	0.0811036	3.75205	0.645001	5.15549	2.68923	86.7739	39.2456	0.0534871	46.1896	0.022524	18.1724	1.72242	10.8106	33.22	22.2911	100.155	26.822	43.8098	92.6965	12.7602	57.7416
TCGA-HT-7690	0.0241751	0.0244472	112.065	17.2089	0.0221519	117.557	876.844	320.014	188.856	28.6075	27.7392	4.7802	246.887	83.4175	9.619	0.0149665	280.617	14.8764	151.021	35.1399	1559.62	176.268	162.561	16.9722	0.233658	21.9884	16.5702	34.0843	0.0501865	1.36132	0.740542	2.74529	1.59185	8.49034	10.4081	0.0302195	54.5535	0.0320811	69.8192	1.54775	1.81297	15.2129	12.9319	140.395	15.0832	43.2121	142.834	31.164	27.3746
TCGA-DU-8162	0.814862	0.141143	45.6064	31.2801	0.0639964	12.4918	0.224717	2.63598	24.8289	172.316	14.5627	0.978052	149.544	54.3228	7.78335	0.217491	122.066	14.0044	51.7038	6.34424	87.4634	216.638	56.9677	10.3762	76.0273	13.8068	29.4421	222.536	2.1535	43.603	0.729978	3.06541	8.31216	1154.71	19.7345	1.30774	46.2082	0.501361	10.5669	1.49918	70.9348	231.149	26.9418	82.3178	11.7018	33.77	150.778	8.61915	216.233
TCGA-DU-7294	0.035266	0.00674468	50.8006	1.89169	0.00412756	42.1299	190.264	9.24482	64.1022	32.2691	15.8423	3.15731	148.568	88.8764	4.13029	0.0292924	122.882	14.3579	97.4613	5.4908	203.424	67.3383	134.258	39.4518	0.184857	17.7965	13.683	13.6472	0.0558675	1.22235	0.744898	1.34399	1.65035	73.0721	16.6737	0.0111207	30.8714	0.0548742	27.5	0.290051	3.83266	7.13506	7.60983	72.2514	12.2548	75.6337	71.7993	17.7981	23.8539
TCGA-TM-A84H	0.0625076	0.022066	88.1037	7.04576	0.0303362	57.5758	29.5196	6.3801	70.7228	62.4336	25.2665	2.67792	217.185	137.225	8.68796	0.0643556	227.062	16.6834	88.9506	15.1771	458.363	152.744	128.394	22.1371	2.06223	24.0233	39.0978	37.2496	0.210081	4.10783	1.02712	2.62724	3.82165	104.393	38.4639	0.0834904	20.268	0.0664439	17.1711	0.788365	6.35263	57.4838	15.7149	105.062	18.3997	55.774	83.0279	31.014	38.5905
TCGA-S9-A6WM	0.00984454	0.0136068	6.41029	11.7829	0.0148701	26.2579	104.257	129.807	91.959	43.3613	18.1268	1.05753	211.71	62.8542	1.51905	0.00969799	84.3526	13.7928	116.722	32.4739	303.575	73.2234	141.071	4.16475	0.426386	18.402	14.5101	37.5686	0.113415	1.58833	0.53303	0.373108	0.621154	2.19453	2.23475	0.0349805	6.0904	0.00846458	26.019	0.62033	1.09776	6.00892	9.79959	72.1235	8.37047	22.3986	41.5852	7.14254	19.2558
TCGA-TQ-A7RG	0.074463	0.0133537	34.0701	6.05838	0.0119442	23.9545	22.5521	6.62806	52.5768	44.1323	19.2131	1.87304	173.957	92.7945	5.18214	0.0540083	78.942	15.1533	70.7274	8.80351	80.4685	95.9246	63.9369	19.9568	3.77152	21.148	12.7791	15.4536	0.077124	2.16034	0.762098	1.95098	2.68576	50.4545	16.4523	0.0423602	24.5211	0.0337435	14.5677	1.0287	8.0549	23.3226	10.3189	68.2249	17.6501	47.5551	68.0771	11.9719	30.1704
TCGA-S9-A7R7	0.190433	0.0608618	27.6653	25.82	0.0471495	19.0328	31.5748	20.0933	81.6373	172.011	32.1936	1.95537	175.719	59.0106	4.0894	0.0163181	176.832	13.8733	100.702	75.8328	194.549	319.5	48.6229	9.94825	27.6381	22.4028	19.2298	82.6082	0.252802	2.25027	0.814083	2.3889	6.6532	131.151	0.397455	0.15274	68.6305	0.126787	37.1478	3.63181	38.4931	118.096	3.27462	227.322	29.7346	41.3134	337.524	13.9253	156.184
TCGA-HT-8010	4.08908	0.087186	31.5313	11.4415	0.0190804	3.61435	0.00708718	0.453592	9.41585	288.542	19.2807	0.391815	145.898	79.3483	5.68514	0.598143	63.0867	16.1516	50.9377	4.48012	7.95052	148.189	16.2483	18.6733	358.577	19.9136	34.0363	151.273	3.82989	51.5579	0.891046	5.58239	29.4774	7386.67	5.26697	1.1838	20.9128	0.539483	3.76334	2.62733	561.476	557.714	13.1417	62.1957	30.9085	38.3012	93.9232	4.9277	371.522
TCGA-DU-5853	0.147333	0.0130271	24.9823	1.93457	0.00585281	11.797	1.78894	1.22349	19.4117	68.9772	17.9855	0.481286	139.517	76.1292	3.9476	0.0425464	66.9219	15.1822	65.1789	3.18434	56.0231	94.4062	26.5823	12.5793	15.0894	18.9332	16.6332	58.6492	0.306747	4.86702	0.835664	1.5603	7.42093	360.66	1.4264	0.0531819	16.5503	0.22995	7.07855	0.861498	25.4275	60.9141	6.18985	62.6414	15.1309	46.1766	86.2999	7.66649	96.9939
TCGA-CS-5394	1.49835	0.0164189	68.3857	4.64735	0.00849259	4.97597	0.920172	1.61578	14.9223	99.4615	19.7076	0.826527	150.917	86.7415	2.72102	0.205197	68.9115	15.202	55.5406	2.94669	14.9986	153.459	33.5025	26.3978	28.1443	19.1025	14.0055	36.673	0.277237	7.13527	0.760555	5.21884	7.62447	679.35	4.87162	0.0557169	31.2067	0.0994073	6.46438	1.00156	255.469	66.029	11.2631	39.7778	17.965	72.7375	65.9786	5.50993	139.998
TCGA-HT-7481	0.883259	0.0755768	93.6185	7.99681	0.0189155	16.4841	0.336285	1.5694	24.6094	146.177	23.4919	1.05268	163.548	81.6941	6.99455	0.214368	97.2896	15.235	65.0291	5.96704	92.1343	135.669	60.3765	20.3712	29.2851	17.5166	29.4403	104.089	0.844288	14.9101	0.884103	2.4734	9.47973	1131.7	9.74845	0.467311	36.5802	0.341162	10.1705	0.874319	86.2213	187.047	19.3288	96.4411	18.4626	48.2484	65.3227	9.26988	178.723
TCGA-WY-A85A	0.195932	0.0211899	38.2584	2.31782	0.00663594	17.3196	0.708181	1.22907	15.4555	76.5586	28.1736	0.39976	195.206	105.666	5.45491	0.0473016	68.4913	16.8607	88.7533	3.32827	52.1513	85.7203	37.304	39.0683	15.1924	22.6858	23.1797	65.8742	0.376797	6.39373	0.969684	1.7438	6.855	392.008	2.10023	0.0746085	21.6416	0.224335	6.22187	1.28212	23.5815	61.9999	8.82565	70.6896	29.9324	55.8898	43.7519	10.1692	114.349
TCGA-FG-7634	0.0381723	0.0221815	52.6659	8.67137	0.0270824	51.3969	56.8534	20.4553	103.303	63.9024	22.7914	4.18447	176.04	73.5468	6.03202	0.0292674	92.0419	13.9318	82.782	13.5094	298.826	170.111	95.6198	11.812	1.45467	17.9292	17.8575	17.7218	0.063058	1.64135	0.787652	1.29543	2.55839	43.5651	7.36378	0.0451981	37.6144	0.0552767	36.9955	0.720415	4.69013	21.0521	9.13944	151.734	11.8728	77.0335	107.765	19.4952	37.0305
TCGA-P5-A781	0.441775	0.0203472	15.2949	2.54335	0.00758471	4.35991	0.23707	0.797815	12.156	106.252	19.471	0.481077	139.109	87.6747	4.23544	0.129828	52.3979	15.8979	65.6536	3.37555	7.28304	104.501	25.8447	22.8741	77.4945	20.0119	23.6308	44.3672	0.495594	10.9775	0.799628	2.76136	10.3441	778.281	2.19168	0.106953	19.9417	0.161263	5.32614	1.18312	76.376	99.694	9.99011	49.5538	24.1611	44.611	70.8176	5.02323	126.169
TCGA-HT-8011	0.0156818	0.00995932	8.45182	2.49042	0.00531392	47.7349	9.66248	23.2906	52.6334	35.8531	17.8182	0.95322	308.475	75.641	4.22632	0.0179018	131.392	14.3975	147.625	5.78767	488.286	173.746	66.2962	5.09293	0.379369	18.109	11.0594	33.1347	0.0513411	0.74549	0.677671	2.01275	1.88655	7.31412	7.26061	0.00852206	12.9286	0.0152664	20.2775	0.320219	1.30017	10.4789	6.40601	44.2704	5.98326	36.6769	89.9771	12.6674	31.5552
TCGA-S9-A7J1	0.158535	0.028596	64.6764	19.3182	0.0219748	24.3422	7.66836	7.24188	43.6919	45.1093	20.643	2.95433	165.687	85.7433	8.72109	0.123961	60.0652	15.0923	63.972	13.6211	147.892	130.984	64.5488	22.282	5.37791	19.8442	17.5155	29.1815	0.143408	4.27472	0.868481	2.68012	3.49402	156.861	43.8757	0.122089	31.3051	0.0633819	13.7417	1.48751	15.4824	53.4423	16.7761	81.4316	18.6417	47.1564	79.5603	12.5888	47.7367
TCGA-HT-7681	0.182284	0.0751274	119.934	27.1637	0.0402052	37.3775	30.0688	18.4121	96.1489	74.857	23.1353	2.44418	190.917	79.5218	8.9509	0.0914257	178.062	15.2226	88.7509	16.4726	280.195	146.544	137.817	31.1806	5.14495	20.2441	32.4039	58.6856	0.192912	6.3305	0.744848	4.36499	4.28275	144.62	30.1666	0.35384	69.1431	0.117482	26.3424	1.72203	15.2603	59.6874	19.6833	134.685	23.9299	43.262	127.767	11.1022	80.1964
TCGA-DU-6408	0.0998722	0.0102889	31.0831	2.71263	0.00512102	23.3987	38.0875	4.04629	43.8424	35.7034	23.7803	0.708175	190.801	79.5635	6.61984	0.0381529	66.9295	15.5482	90.1669	4.05966	147.111	77.1325	40.1678	17.3467	4.94118	22.2151	15.2289	26.6027	0.164263	2.70557	0.820034	2.94239	3.02812	123.021	4.64951	0.0352431	30.5304	0.136237	17.5613	1.27765	13.3841	56.6658	8.16318	51.2883	19.5387	51.9361	130.75	10.3379	52.9586
TCGA-HT-7607	1.15568	0.381536	239.945	66.1022	0.135329	33.4351	1.28626	7.00615	57.7714	179.831	20.0594	2.78314	163.75	65.947	14.0775	0.345842	258.708	14.5194	59.8392	13.7997	356.304	269.347	109.336	18.8527	24.9766	16.2249	37.5664	202.101	1.00056	24.825	0.812324	9.20824	9.75882	1427.48	50.5131	4.64729	93.9298	0.468631	20.1021	1.60274	85.4508	276.885	27.3226	169.206	18.3798	43.1743	131.2	12.6771	215.282
TCGA-S9-A6WH	0.014299	0.0111473	16.3839	0.632143	0.00455669	26.9748	142.154	5.19307	52.036	26.6589	11.7966	1.96091	182.545	120.037	3.11584	0.0318835	125.763	16.2433	90.8177	4.93938	96.7306	84.8642	166.127	32.8912	0.433304	20.8597	15.8724	9.96532	0.0644978	1.72811	0.711587	1.57383	2.21351	21.9959	8.73061	0.0146626	20.8687	0.070877	15.5054	0.685768	1.95212	4.52428	4.60287	40.4367	12.7711	52.4142	100.212	14.9642	32.7512
TCGA-CS-4941	0.114869	0.234918	220.293	233.246	0.455107	297.685	108.221	830.196	248.245	107.044	44.248	25.5563	222.001	69.9117	29.1593	0.0679442	208.696	15.1334	170.453	393.123	2844.18	519.296	181.556	9.42472	5.11202	19.4153	52.9877	134.418	0.199842	3.95903	0.765667	3.76751	2.49058	100.66	38.0958	0.661177	91.9482	0.0525983	71.9863	2.21984	9.03164	92.8205	7.4757	383.388	16.2329	46.7224	376.137	56.7501	83.4517
TCGA-HW-8319	0.0972645	0.0457557	231.961	8.02967	0.0267219	41.9283	11.069	9.98387	58.6223	36.1198	21.5053	1.8864	178.016	87.2604	6.01391	0.0463587	127.093	15.1354	70.7078	7.37049	633.634	94.4531	84.0277	13.2051	1.83354	18.5182	15.404	55.1095	0.167532	2.40978	0.91521	2.52756	4.07239	144.824	14.3022	0.157123	38.7221	0.120299	18.2675	0.609555	7.27136	54.1903	16.2032	110.326	12.685	49.9816	52.6233	13.9641	55.7075
TCGA-DB-5279	0.314496	0.111287	60.756	36.7694	0.0525648	27.2608	20.7397	6.66578	65.3095	124.605	29.406	4.57682	181.55	86.4215	10.0426	0.369679	258.194	14.6804	62.1894	13.1721	463.597	430.619	74.3974	44.2274	17.988	18.9105	31.1232	111.016	0.264058	13.3302	0.761212	10.6431	4.70527	583.576	33.9858	0.265061	37.6567	0.13902	23.2951	2.45243	34.9289	109.858	34.0701	78.9582	37.5062	74.0225	97.4865	11.9675	109.341
TCGA-HT-8106	0.0141812	0.0208202	15.2596	2.18719	0.024383	65.6236	24.1273	160.275	57.3793	39.9558	38.8971	0.450997	93.7264	40.0414	4.91337	0.0059513	103.665	13.2458	77.0342	14.7867	740.773	209.659	38.7797	5.84874	0.176637	23.9221	5.65577	30.108	0.12098	0.617045	0.78446	0.269624	1.90129	4.38706	0.513199	0.0431178	20.4658	0.148192	48.729	12.9126	1.27523	9.77132	1.84293	253.202	29.2297	32.647	95.8745	14.0864	37.288
TCGA-HT-A4DS	0.00517916	0.0127575	13.5035	8.59985	0.0096385	248.657	1496.65	359.541	205.457	157.931	21.711	0.868544	400.457	81.0012	13.0733	0.00636427	204.868	16.0577	438.533	49.3427	2402.63	58.839	478.039	15.1787	0.126165	22.2784	32.3663	4.53933	0.0444887	0.787665	0.593275	0.0692226	0.908824	0.434264	3.49168	0.0157221	25.4289	0.0267406	71.8228	3.95496	0.185733	7.04266	5.69205	254.172	20.3178	17.0634	91.0081	67.2144	23.741
TCGA-DB-A4X9	0.0750193	0.0459187	47.9452	11.1094	0.0330735	30.6719	22.0636	7.44954	81.5818	54.9327	13.6091	4.87037	215.284	85.4592	6.47507	0.0625805	101.202	15.2429	76.2436	20.1666	752.451	210.894	102.15	9.94164	13.7513	19.2395	21.6903	55.0654	0.129581	4.22401	0.790496	2.88416	4.9577	223.887	15.0905	0.121835	36.1622	0.0877099	25.8033	1.01778	10.5334	52.8883	15.7184	47.9899	12.8541	37.7013	119.8	12.2074	53.9025
TCGA-TQ-A7RJ	0.143798	0.00989232	13.3742	2.79465	0.00576731	9.8289	0.845096	1.27106	13.3726	63.1563	21.3209	0.525583	187.201	98.4924	4.11579	0.0586878	50.7427	16.3564	80.4885	3.87512	52.9996	92.1585	21.6567	18.4457	21.702	22.5886	17.2195	44.1573	0.242361	5.95081	0.903222	2.56689	6.79792	223.226	2.49728	0.0344234	14.9725	0.136117	6.33521	1.63745	27.0032	60.402	6.27558	35.6766	24.5096	48.747	70.8015	8.69208	78.7803
TCGA-DB-A4XE	0.065545	0.0190505	32.9138	4.88307	0.0109937	28.632	7.56837	4.83591	40.7839	38.104	15.3508	1.30008	211.477	78.335	5.71645	0.0419473	80.8329	14.9634	85.8005	5.81081	278.159	104.685	66.7598	12.4186	3.48162	19.2397	17.1547	41.1895	0.145072	3.84166	0.791328	2.39274	3.64878	81.0248	17.3039	0.0372492	27.2876	0.0770423	14.0338	0.853591	7.17705	26.2173	14.2118	50.2692	11.2998	37.6745	80.3882	11.4023	45.2282
TCGA-DB-A75O	0.0501708	0.0508028	17.6499	35.2613	0.016122	46.6569	12.2104	7.34612	71.9732	78.1754	37.122	2.30321	275.78	99.492	10.9899	0.0508813	130.348	16.6202	171.281	29.8596	419.391	114.129	62.9693	30.5161	3.42478	27.4883	18.075	34.2576	0.148136	2.40291	0.819495	3.77133	2.76365	63.9061	4.22569	0.103368	29.3299	0.0995869	22.781	4.49013	7.50046	78.1068	4.12036	92.7992	42.6061	41.9809	116.831	22.5147	64.5742
TCGA-FG-5965	0.105245	0.0213336	93.6875	5.84349	0.0165686	38.2314	32.983	13.515	63.5011	86.1269	27.0993	1.55367	240.337	82.2813	5.53475	0.144405	127.367	14.7002	72.462	8.75609	335.73	170.555	33.0139	5.15956	10.4802	18.5423	12.2449	27.9211	0.167897	2.95889	1.15116	3.25146	3.29889	177.591	7.80428	0.127327	43.7945	0.11288	19.8957	3.39834	21.222	85.308	11.5545	88.3089	11.293	63.9764	67.7499	11.4605	77.614
TCGA-WY-A85D	0.151957	0.0334918	12.0434	4.73535	0.0111595	10.3154	0.601654	1.15909	16.8047	107.542	28.265	0.733106	210.647	111.243	5.48723	0.0758284	97.2481	17.1866	99.1877	7.48563	89.5313	111.841	28.0833	21.2416	32.9283	24.4346	23.39	50.2085	0.244984	5.24625	0.908415	3.07325	8.25982	210.321	2.90749	0.113509	16.4869	0.112829	5.95288	1.96205	22.307	75.1167	7.29528	61.1753	32.6101	43.6092	65.734	6.80792	108.333
TCGA-DU-A7TI	0.0205284	0.0373039	37.8987	19.2696	0.0217306	84.7693	86.0799	19.512	80.1648	31.9001	30.7693	3.15621	209.953	83.3385	12.8234	0.0423105	149.855	15.5237	90.0388	8.01313	692.177	81.6219	82.1075	22.7686	0.753816	23.0785	49.749	81.549	0.18053	5.04929	0.929927	1.08481	1.3547	49.0027	29.4105	0.071562	28.3815	0.0655945	20.6771	2.33185	2.07507	17.0071	26.958	92.6565	33.2785	65.0676	85.5104	27.7803	30.4463
TCGA-HT-8018	0.0830557	0.262134	148.496	94.7539	0.231767	131.761	32.3334	104.449	119.673	70.6054	25.6249	2.88882	212.264	56.956	20.746	0.0514391	362.568	14.0963	85.6269	30.7474	1225.11	156.889	159.466	16.7625	1.45288	18.7657	32.7156	111.884	0.245522	6.27312	0.79577	3.55165	2.75512	40.1974	52.1605	1.95474	87.4746	0.183822	45.4947	3.59602	4.61194	46.8925	19.7604	264.593	19.3434	37.9301	128.254	29.2201	65.3575
TCGA-P5-A731	0.652896	0.0402074	8.68223	5.02093	0.0110706	4.35162	0.0930848	0.874533	15.2089	219.262	16.4636	0.424489	162.178	70.8662	5.2138	0.144155	44.2779	15.5222	64.9659	4.88371	3.96051	150.155	22.4047	13.4855	200.573	18.9696	42.7286	97.8599	1.46792	38.4692	0.770045	2.55348	17.1894	1374.86	1.3714	0.189694	23.5391	0.293924	6.50391	1.80294	171.058	235.525	12.0881	55.3664	21.5516	34.159	183.015	6.21378	236.885
TCGA-DU-8163	0.123457	0.00771723	7.02711	1.19709	0.00430022	5.50121	0.455158	0.974533	8.65836	51.4304	16.3475	0.32065	146.031	69.3419	3.13431	0.0303366	20.4122	14.9478	61.8895	2.68422	12.3294	93.052	15.2225	9.55828	19.161	18.5286	13.0882	33.5135	0.244262	5.19353	0.778374	0.934337	4.66726	224.963	0.644796	0.017077	10.7074	0.107256	4.39198	1.15567	31.9064	46.7072	5.16001	27.0356	13.7264	39.8492	93.278	6.3162	73.2815
TCGA-FG-8182	0.057129	0.00346184	6.35421	0.506498	0.00348555	11.2353	1.58554	1.27757	13.0067	29.8801	14.7574	0.542228	150.996	83.0313	4.32616	0.0290321	26.6397	15.1544	64.3752	2.15277	32.5754	72.4241	19.4393	10.7024	7.54071	18.291	16.7709	24.0358	0.15958	4.68702	0.784243	0.877373	3.81381	94.1	2.04098	0.00912904	10.5018	0.0981982	4.94992	0.750997	10.8436	24.5913	6.96804	29.7532	10.8994	43.1939	88.6705	10.2708	39.2466
TCGA-P5-A5EY	1.67817	0.143153	28.6619	12.4576	0.0242507	9.21455	0.041612	0.870092	18.8728	320.762	24.7024	0.549305	166.042	71.3055	8.18187	0.242399	53.03	15.8087	62.8932	9.11416	14.3757	185.895	24.5572	19.354	277.495	19.2971	36.6159	168.686	3.31159	35.0666	0.897373	2.93677	23.9306	4777.02	0.949316	2.86942	36.1818	0.814102	6.56898	2.45754	246.242	526.07	9.4736	99.2651	37.7859	34.1708	201.86	7.73572	338.539
TCGA-TQ-A7RN	0.0878046	0.0084201	39.7993	2.75488	0.00730748	17.6286	21.2202	4.46178	43.5202	51.0497	21.4605	2.0612	184.955	96.4927	3.98751	0.0616255	73.8215	15.5312	71.5875	6.16812	88.5659	113.962	67.6325	22.3214	4.45787	20.8903	14.8059	17.4975	0.0878988	2.63144	0.81445	2.4588	3.12574	132.644	9.74593	0.0215529	28.9892	0.0409607	13.7919	0.756427	12.5304	24.6212	9.44468	44.6324	17.9273	58.7565	95.0667	10.924	43.3536
TCGA-FG-5963	0.0150306	0.00438452	11.4265	1.13886	0.00747252	78.5803	38.8975	9.68176	99.8014	26.4629	22.3166	0.794742	304.068	77.8138	6.01854	0.00451512	43.7497	14.2356	121.067	3.84698	241.728	85.3977	70.5353	5.31088	1.19046	20.1451	77.5719	21.6028	0.190137	3.8635	0.924364	0.208205	1.90491	6.62885	6.35363	0.0196042	45.7651	0.0998462	29.2576	0.176146	0.801313	25.5595	3.75719	114.011	3.89613	78.4296	95.936	16.3166	57.6086
TCGA-HT-A615	0.053552	0.0117824	33.697	2.23365	0.00652681	22.243	7.77129	4.21101	29.1204	55.8104	24.1425	1.07248	133.359	86.4609	6.66583	0.05937	130.086	15.35	83.3804	5.88599	76.7965	87.155	70.0394	34.4918	3.2667	20.6167	17.0553	22.0175	0.121109	2.51333	0.733125	1.37349	3.83453	62.3635	7.98047	0.0290981	21.6967	0.064139	10.8331	1.37268	9.65152	21.6856	7.13345	66.7502	24.6409	47.6954	54.0438	11.7923	35.3991
TCGA-CS-4943	0.0135235	0.0147158	62.9836	4.33364	0.00765764	177.947	715.15	63.415	114.166	20.9518	28.8342	3.05544	419.376	122.764	9.4549	0.0219324	324.87	15.9918	171.457	5.22918	1651.94	115.829	147.622	25.816	0.0386591	22.1942	20.5848	21.7414	0.0601966	1.1763	0.975815	4.8415	1.46077	7.39719	16.0919	0.0130772	44.6105	0.091039	41.065	0.189773	1.10759	6.6703	10.0965	75.1509	8.10002	102.574	133.184	36.2038	24.4314
TCGA-HT-7686	0.039094	0.037305	204.232	44.8985	0.0396765	174.25	2116.26	3270.2	298.732	51.2117	33.8432	6.05813	173.829	56.9384	15.8604	0.012252	527.724	13.4987	156.443	141.035	4349.28	249.216	175.71	11.3311	0.100684	21.6824	17.62	38.0831	0.0671021	0.780681	0.770819	1.63399	1.09178	10.8273	13.2615	0.0750195	86.717	0.0563771	138.045	2.04965	3.84118	18.7858	5.45631	320.589	21.5079	42.9433	141.614	29.9316	36.9943
TCGA-DU-8164	0.172296	0.00924232	55.7647	4.29378	0.00832086	14.283	7.54163	4.15526	33.0284	42.5591	14.5564	1.33746	154.437	83.7018	4.28112	0.0744402	82.696	14.68	55.2703	4.16323	54.5859	106.365	57.3236	13.4284	3.65931	17.41	10.8366	21.984	0.0989047	3.42147	0.759325	2.78565	3.63663	161.21	11.1268	0.0402456	33.5951	0.0619412	11.382	0.516866	19.8015	26.3386	12.5707	52.2845	9.43892	51.5846	60.8664	9.04154	43.7243
TCGA-RY-A847	0.402521	0.0228492	12.7527	2.0156	0.00590611	4.76687	0.0915023	0.534408	8.45846	111.643	17.7045	0.239334	138.049	78.1844	3.91764	0.0953266	47.3307	15.7956	58.518	2.29463	8.00959	84.388	25.8381	24.5573	56.7083	19.7404	22.7341	64.4943	0.789559	15.5297	0.776556	2.19253	9.78875	806.142	1.77653	0.117688	15.4118	0.317977	4.10639	1.54358	64.0191	100.286	9.78266	46.329	23.2829	37.9503	71.4264	4.6726	137.714
TCGA-FG-A4MW	0.232295	0.217924	58.105	6.66198	0.0162266	21.1669	0.0673692	1.66019	17.8963	176.722	28.4239	0.474823	229.421	85.5476	6.21936	0.0527024	79.9131	15.932	115.666	9.17136	36.3278	74.2679	50.1064	15.5223	12.0364	21.158	17.6498	124.25	0.519919	3.4676	0.850678	0.497232	8.12244	206.517	0.785055	0.645491	14.6374	0.246311	8.25562	1.48152	31.8297	77.7754	11.1515	150.969	23.6694	37.8786	30.8925	12.7374	162.101
TCGA-HW-7486	0.460179	0.0672363	70.686	7.01573	0.0167888	20.1128	0.936177	1.67011	32.342	131.758	32.4425	1.14518	174.128	90.4908	8.40114	0.173113	58.4509	15.887	87.6773	5.97679	138.471	126.232	55.3907	28.1073	18.4878	19.7795	18.1909	57.5457	0.393572	7.64336	0.802387	1.25142	7.09635	580.757	10.5672	0.207548	27.3854	0.233221	11.6536	1.53457	43.9668	142.978	14.1059	112.127	25.018	50.5043	61.0781	12.2417	166.271
TCGA-DB-A64V	0.159808	0.0553698	17.6739	6.84208	0.0100582	21.4476	1.90519	1.85162	28.1882	167.937	29.7444	0.719584	180.408	90.6496	7.9647	0.0669361	119.766	16.3904	121.061	11.746	70.7705	125.721	55.8493	32.0616	17.8732	24.2423	15.0963	38.9217	0.337968	3.21108	0.757964	1.26269	6.20567	130.983	1.96142	0.120963	23.3892	0.194124	13.2002	2.61729	25.6748	85.1768	4.42787	115.051	33.6526	40.0286	106.908	13.3036	140.146
TCGA-FG-A711	0.14155	0.0352471	71.9809	8.5208	0.012875	34.8897	7.35131	6.1438	54.4452	83.1244	20.3515	1.4302	214.959	88.9669	8.33858	0.112513	134.804	15.9249	96.5649	8.71974	346.77	104.397	100.806	22.8316	7.55925	21.1931	21.8012	43.3319	0.196301	5.49016	0.775851	3.01619	4.38254	205.906	27.326	0.0956057	33.2735	0.0728491	13.9465	1.37844	15.4499	62.584	16.5594	84.7752	21.0679	38.2965	98.3842	12.7724	84.4775
TCGA-DH-A66G	0.149989	0.0318773	65.8804	28.4732	0.025684	29.1012	3.39342	4.98228	41.9212	80.5943	16.8483	1.4504	173.415	66.8711	6.32904	0.0773234	159.978	14.6045	64.5489	6.04349	197.263	121.569	40.9947	11.5042	7.56288	19.1215	29.6793	115.683	0.435349	8.40424	0.90039	3.33252	4.44091	321.9	21.8711	0.236053	31.6021	0.205876	18.3801	1.95825	18.2036	83.9967	13.8686	97.0754	15.9585	50.7875	80.4147	15.4814	79.5936
TCGA-DB-A4XB	0.0280634	0.0094689	134.197	5.02965	0.01336	69.3178	228.827	26.4507	129.905	22.2505	13.6791	2.7	233.373	100.748	6.71463	0.0303475	171.6	15.1391	79.249	5.56649	721.271	78.0998	90.6093	9.56079	0.44253	19.6232	21.8715	23.8593	0.0810584	1.88538	0.843685	3.8624	2.31458	27.5202	47.0792	0.0238089	45.3084	0.0441127	21.5237	0.422566	2.79147	25.8488	13.5268	74.8856	6.49112	48.8089	97.9335	25.4386	16.5247
TCGA-HT-8109	1.15685	0.0466923	39.5557	11.3493	0.0215939	8.94412	0.345627	1.38738	19.2023	137.659	17.4095	1.12382	133.341	68.5261	6.32428	0.267697	103.001	14.6186	47.9217	4.82254	52.8835	175.36	36.7003	19.6189	61.3883	16.5887	23.7032	103.556	0.79295	21.1152	0.774177	5.19364	11.0871	1889.03	12.7005	0.342121	35.6612	0.273621	8.73137	1.26387	161.881	186.677	14.4685	54.9319	17.1861	49.2025	122.642	6.98462	174.368
TCGA-HW-8322	0.0299548	0.00400286	11.8575	0.315701	0.00352878	16.8106	3.05679	2.08101	25.4733	35.2842	11.4115	0.694381	157.238	90.188	3.75907	0.045905	60.198	14.7384	56.3905	1.91627	28.2982	74.4826	55.7902	11.3034	1.10232	17.0889	9.83395	11.9522	0.0929321	1.92469	0.766673	0.922536	3.58201	93.28	10.4843	0.0114375	12.5888	0.0499971	7.82962	0.290009	5.25246	19.1082	4.98543	38.0843	6.57726	45.1747	49.6581	13.602	29.2734
TCGA-HT-7483	0.228389	0.0146681	27.0113	4.12635	0.00767617	15.4382	9.4401	3.04754	25.1913	61.6716	22.4632	1.17504	165.04	69.9909	4.70525	0.0415417	61.8158	14.8091	68.8915	6.94165	98.6996	166.915	49.7546	21.7606	12.2168	19.1403	23.0669	54.8445	0.249677	8.29222	0.837689	2.54546	4.13076	358.592	2.31611	0.0481618	33.561	0.11695	16.7722	0.682227	47.9065	59.2952	10.7741	48.2924	16.8885	61.8446	126.607	8.50636	86.0811
TCGA-FN-7833	0.0146789	0.0776553	26.4699	16.6408	0.0539725	106.688	29.7298	68.4883	114.607	19.8513	63.5223	2.75976	245.017	83.8037	18.0157	0.0236901	152.378	16.0363	111.838	19.6819	1251.08	149.157	86.2196	20.9427	0.994802	29.903	43.2413	49.6807	0.160817	2.48186	1.21528	1.19008	1.46034	14.7197	24.1017	0.0754772	38.9608	0.0757119	45.094	3.15441	1.44005	21.0411	8.73781	104.116	54.753	77.48	57.7494	25.6989	21.2868
TCGA-HT-7467	1.33644	0.0814118	35.2208	4.90702	0.0107789	6.68815	0.0183954	0.480259	7.8119	180.869	20.7482	0.350645	147.142	75.1887	5.42956	0.210651	38.7318	15.5427	58.8867	2.68548	12.6068	105.398	24.2254	21.5175	72.9146	17.2835	22.0337	121.586	1.56461	26.159	0.860989	1.523	13.5774	1818.64	3.70765	0.420866	17.5115	0.641161	4.58486	1.513	127.057	239.419	13.6776	67.5034	21.1674	41.5774	72.3929	7.86692	276.665
TCGA-S9-A6TZ	0.0784752	0.0144745	17.7312	11.9229	0.0154426	26.783	13.0475	8.27946	57.673	37.0931	24.0165	2.6984	193.871	99.0684	7.69459	0.0880784	124.057	15.6631	81.6638	8.07725	217.953	205.443	48.5187	17.5495	11.1593	22.1215	35.044	27.1999	0.136959	5.64329	0.8881	4.36925	4.73544	93.4333	42.6191	0.0292738	36.0851	0.0424333	14.9483	1.29699	16.4979	52.4404	10.1323	63.7463	20.4824	68.2305	86.8111	11.5735	53.2948
TCGA-CS-6670	0.556458	0.0447448	25.8248	3.30327	0.00897916	7.95136	0.199934	0.779569	16.583	145.436	21.6796	0.534933	167.157	89.5566	4.90967	0.148113	63.0914	16.0643	63.5619	3.80867	16.7922	105.26	34.0251	20.196	54.6824	20.7997	21.6798	76.7605	0.849037	12.3138	0.846036	3.08779	10.7078	1962.51	2.6426	0.256373	23.2012	0.349889	6.20042	1.45036	101.265	178.684	8.90098	63.87	25.3991	46.1085	84.1338	7.01645	187.034
TCGA-HT-7482	0.347116	0.0738768	84.9761	38.7118	0.0264659	44.7148	9.51541	6.39757	51.7044	112.619	27.4026	3.3767	156.939	78.5248	12.1562	0.109045	163.835	14.9932	87.3626	21.6078	409.991	202.42	57.2612	22.4869	18.4291	20.9389	37.4731	109.095	0.291669	7.33907	0.812765	5.01095	4.59929	428.357	10.2293	0.120686	46.2093	0.230102	27.008	1.13145	46.2687	198.08	14.7586	126.424	24.4516	72.8675	138.891	17.1933	100.296
TCGA-F6-A8O3	0.0302809	0.00545525	36.9325	6.85753	0.00449374	36.1553	430.984	10.2319	68.7236	28.2785	11.4497	2.30551	203.696	94.4198	3.65251	0.0256552	79.4347	14.8445	86.3457	4.73603	126.778	87.9299	100.606	53.1611	0.939406	20.0353	12.5013	8.73795	0.0333193	1.34696	0.661746	2.16421	1.99283	31.4883	16.0502	0.0134824	36.2603	0.0354747	23.1417	1.01821	2.57196	5.52517	13.1633	57.0527	14.2	62.5208	87.2965	22.4848	17.4084
TCGA-DU-7007	0.0176367	0.0168191	37.4159	10.2127	0.0200728	116.304	4218.81	682.635	166.503	30.6003	87.6343	5.84221	263.074	86.2828	11.9222	0.0155033	143.113	14.681	153.111	6.56791	828.926	87.4058	74.2603	35.4844	0.0329753	23.6346	41.3682	34.3804	0.0458284	0.579192	0.905068	5.39604	0.864446	9.50855	1.64868	0.0679141	35.8032	0.0202832	40.6787	1.59176	1.37086	11.5439	1.01678	276.793	29.3657	105.156	1596.1	25.3672	142.737
TCGA-S9-A6TW	2.043	0.00571911	0.88378	0.113739	0.00085212	0.0630246	0.000205127	0.0567244	0.09491	301.219	8.43323	0.0344455	107.624	71.5111	1.07684	0.0954796	7.74557	16.4883	54.4959	0.802229	0	86.1286	2.51882	17.5061	989.174	17.8915	23.5323	48.8233	3.79973	51.4366	0.755913	0.818268	47.6555	6483.49	0.00101954	0.0231055	3.75811	0.629294	0.594936	1.33658	1830.69	169.563	3.39342	13.9812	18.2327	26.5959	151.841	2.62162	453.401
TCGA-S9-A7R3	0.223083	0.00972286	3.54284	3.32718	0.00560583	4.85601	0.602403	0.767745	9.75448	88.7676	26.7251	0.831837	175.714	97.051	4.2053	0.0819186	41.3501	16.6338	80.5029	5.21389	18.8556	200.581	13.6136	32.3279	144.911	23.9782	25.6759	33.1113	0.275566	12.2293	0.822862	2.90907	9.53154	373.143	4.86588	0.0282033	13.0842	0.086538	5.34305	2.64475	56.6619	84.6451	7.00726	33.3882	36.2537	56.2833	108.984	5.18526	140.718
TCGA-HT-7694	0.613542	0.192084	132.023	69.6025	0.119039	35.2546	5.2743	11.41	67.5183	118.785	17.416	3.68804	178.324	65.3013	13.8688	0.327736	193.239	14.2837	55.177	16.5774	422.726	257.816	121.72	17.3245	18.8818	15.806	38.7545	146.271	0.488011	29.5595	0.766255	7.46312	6.61298	601.533	73.2672	1.93505	89.2862	0.298153	25.4435	1.33084	50.7193	162.121	39.0209	120.999	14.7612	39.4012	180.519	12.9364	139.141
TCGA-HT-7676	0.0543932	0.00901017	14.5112	0.78569	0.00425835	24.1247	11.3689	2.97281	30.769	53.3128	25.7733	0.454052	169.02	84.6412	4.50116	0.0165615	69.0079	15.4444	93.662	4.17284	87.0396	91.3259	45.9081	18.0263	5.53771	20.5831	18.0055	35.3339	0.202419	2.3908	0.826023	1.29082	3.76485	125.328	0.541367	0.0186759	25.3189	0.195446	10.7037	1.04335	9.26948	26.7052	5.29529	68.6634	21.2826	50.1251	133.517	9.96269	70.6161
TCGA-DB-5270	0.386336	0.355404	188.596	44.3916	0.0697846	41.6587	3.47501	8.70454	66.8335	111.333	23.0644	1.6635	194.223	69.4533	11.7944	0.131735	177.003	15.1158	77.0701	10.9387	379.021	169.762	115.191	22.8217	8.23865	18.7393	31.2903	177.474	0.674469	13.3833	0.812584	4.76386	6.40661	468.833	34.4284	1.68664	61.8049	0.420168	19.5807	2.19179	29.1215	133.587	22.366	161.693	20.5908	40.2977	129.748	12.3128	156.952
TCGA-HT-7620	0.320042	0.017607	8.16574	1.52397	0.00773394	4.43274	0.1805	0.754734	10.2725	101.707	19.9845	0.65892	135.368	71.9455	4.99258	0.174037	26.0506	14.991	57.4259	3.57108	22.6063	90.7922	22.1847	13.246	49.1593	17.2025	16.2707	41.1536	0.42309	13.1687	0.78726	0.923452	7.31456	525.149	2.83755	0.0636615	16.1997	0.165453	6.03883	1.04857	46.5877	133.192	12.1912	32.9193	16.6737	39.4012	71.5291	6.35298	110.176
TCGA-TM-A84F	0.0452069	0.0174625	18.9256	5.25429	0.00879198	27.6369	3.5641	4.47727	27.2878	66.6563	27.397	0.758557	158.122	74.7633	5.66897	0.0249484	88.274	15.7164	115.375	10.1905	147.095	57.4143	49.1299	18.5681	1.16032	23.0952	17.0776	29.175	0.176684	2.3987	0.803357	0.719398	2.45693	34.7637	1.50559	0.057777	15.3736	0.0842549	9.86848	3.00298	5.11472	25.5534	6.86249	86.4893	32.768	27.4755	41.0139	12.5372	40.9681
TCGA-HT-7874	1.46745	0.211391	209.245	53.059	0.105768	27.8741	0.906076	4.76438	39.1298	163.289	16.307	2.33969	155.646	65.781	11.3888	0.388494	181.988	14.4355	51.518	9.26145	275.132	222.347	82.6671	18.6065	24.888	15.5457	30.9846	180.905	0.930884	29.2939	0.791029	6.96626	10.5906	1372.28	69.8684	2.84922	69.978	0.397426	14.4729	1.56255	110.833	247.526	28.6677	126.603	14.8578	40.3542	111.362	11.1587	202.917
TCGA-HT-7611	0.0818978	0.0157369	44.8895	9.4094	0.0110908	26.4436	125.415	12.0716	77.0058	40.7123	32.0406	3.47241	194.099	86.4143	6.01392	0.0284285	132.164	15.1443	96.0808	13.7062	325.567	159.355	61.6302	24.506	6.90988	21.6408	21.0486	49.4632	0.0943085	2.26956	0.886813	2.98221	3.38509	130.842	3.5878	0.0300295	52.9662	0.0569692	25.8207	1.09616	14.1114	58.9901	4.75924	76.1806	23.6341	75.1082	209.83	14.6059	81.2095
TCGA-E1-A7YJ	0.0039665	0.02288	18.7253	40.6678	0.0656312	23.6665	50.5464	2271.99	124.099	61.0665	21.795	1.84161	246.949	81.1016	0.792229	0.00536482	147.721	15.3292	289.461	127.852	738.275	117.387	204.315	4.65058	0.576607	23.859	8.04736	35.4754	0.0452551	0.468545	0.68374	0.105455	0.497853	0.752312	0.0610351	0.0749239	5.42302	0.00202192	59.8803	3.1344	0.203137	3.12915	6.73999	78.4467	12.3212	23.5557	21.2999	10.8518	12.4695
TCGA-DB-A64S	0.108002	0.00900469	9.30245	1.74483	0.004084	11.3138	3.60365	1.70235	15.0038	69.8263	23.5305	0.451635	168.04	76.7835	4.14238	0.0200908	59.7538	15.6727	82.4015	5.03984	34.8708	114.185	23.997	17.8409	15.2143	22.5915	16.0854	35.9587	0.178301	3.24587	0.849539	1.17777	4.74696	145.663	0.457106	0.0218636	18.5508	0.128577	9.87423	1.3085	28.5452	35.6576	4.46888	43.5221	25.966	55.6483	119.922	8.71068	79.7751
TCGA-HT-7689	0.131219	0.0207951	55.2648	16.1697	0.0120812	48.4699	41.8109	10.3959	47.7321	82.4257	25.1827	3.98155	191.964	85.4794	10.2803	0.0775802	99.0549	15.163	92.0059	13.6192	518.704	207.913	81.2258	30.6673	11.4229	20.1161	21.5254	35.1191	0.158811	4.15408	0.758584	2.46679	4.15482	138.271	27.2874	0.0301245	47.6453	0.0617271	23.3566	1.10847	23.05	79.0541	9.63781	87.1041	20.7297	71.968	122.159	18.8652	100.794
TCGA-S9-A6TX	0.300915	0.0120627	4.54615	0.801946	0.0026888	2.26081	0.0540522	0.329434	4.13299	97.4465	16.1717	0.158366	166.419	101.758	3.15515	0.115188	28.376	17.0022	74.5843	1.53049	0.612831	69.0563	13.5243	29.2602	71.115	22.0997	14.4541	25.1803	0.350339	9.48941	0.788998	1.74346	9.51876	405.788	0.855005	0.0347469	8.14399	0.161869	2.53271	2.01652	83.4202	61.1907	5.63777	25.8885	23.9933	40.1039	49.9675	5.75928	146.524
TCGA-HT-7474	0.572862	0.138901	100.412	24.5825	0.0420515	18.3528	1.46612	3.19644	46.451	117.884	20.9231	1.62891	173.495	71.3995	8.37758	0.180673	124.779	15.1362	69.3849	9.71517	181.718	159.993	69.2424	16.6068	30.4077	17.7122	40.9155	142.53	0.6438	19.7838	0.86489	3.76388	9.83138	813.867	19.0059	1.17553	52.2164	0.302134	15.0998	1.51624	50.9808	162.722	22.6052	118.852	21.5918	40.5784	95.797	9.42171	172.493
TCGA-DU-5849	0.297308	0.0267475	24.4783	4.88549	0.00822494	10.7772	0.869509	1.39229	21.8426	126.032	18.8022	0.616753	176.328	85.4876	5.70315	0.127536	75.9551	15.7414	70.0089	4.27494	28.518	108.682	45.5212	23.6525	23.4528	20.0021	20.9247	61.7313	0.446068	9.5683	0.816347	2.59242	8.54081	669.32	6.14689	0.112832	24.4995	0.262758	8.44653	1.37058	61.0943	86.5722	8.41965	55.6436	21.1092	46.879	94.3051	10.3906	153.271
TCGA-QH-A6XC	0.0694437	0.093502	26.0439	21.2754	0.0161958	19.1488	0.149908	3.69132	28.7858	143.729	18.1223	0.380764	252.869	77.3206	5.95198	0.0602991	88.9756	15.735	120.338	8.22184	50.8575	55.2507	77.8141	12.8099	6.96669	19.6438	17.8191	80.3516	0.292059	5.15792	0.681389	1.35297	3.34843	68.5065	4.19058	0.456336	15.9541	0.108267	7.93569	2.57343	8.0421	55.6588	10.4004	84.109	17.1284	21.9174	32.5711	9.26436	97.0904
TCGA-QH-A65S	0.631586	0.0291698	10.694	1.91964	0.00608587	4.98833	0.213452	0.581498	10.0632	186.164	25.8318	0.313871	169.803	84.2332	3.37999	0.048379	39.2868	16.1893	89.1144	5.40571	25.2424	124.792	17.6143	17.2337	81.586	21.5142	19.9136	51.5529	0.751882	7.6918	0.830481	1.39176	10.0337	929.732	0.200196	0.0735676	15.8463	0.386928	6.55686	1.585	123.888	133.612	4.92747	62.9563	26.6295	43.5688	114.807	6.02695	224.585
TCGA-TM-A7C4	0.454148	0.0293318	27.3472	6.03687	0.00992366	7.61667	0.149152	1.01472	11.953	87.2899	18.6868	0.364243	174.377	78.1744	4.83526	0.0913897	65.0534	15.6515	63.6492	3.00445	32.1021	94.3257	33.1359	19.4293	36.9685	18.1492	26.6028	108.463	0.649999	16.7784	0.867561	3.58143	8.88093	767.086	4.09532	0.191776	29.274	0.354915	5.64666	1.02447	53.2228	95.3273	14.2637	52.7532	18.2446	43.3232	70.888	6.21339	143.197
TCGA-E1-5307	0.073396	0.041637	132.18	17.3726	0.0255765	106.72	465.833	56.2684	121.822	42.749	31.7877	5.61587	205.911	96.6323	7.84026	0.0404319	209.207	15.3084	93.0124	18.3798	1353.23	155.895	153.684	37.4053	0.479098	22.4687	19.1041	31.5315	0.101422	2.10036	0.788649	2.60685	2.50943	68.8307	42.4523	0.0625237	52.6951	0.0949093	33.0858	1.15802	9.58691	38.4986	12.3327	131.127	24.3396	86.2578	105.506	21.5735	41.9039
TCGA-HT-7616	0.265171	0.0685486	19.043	5.2258	0.0154204	16.5768	0.634503	2.48204	14.8053	130.496	30.218	1.20715	111.207	79.8471	8.62471	0.10657	238.36	15.0757	67.285	6.70025	55.4683	309.221	35.9262	23.9442	14.631	20.7376	23.7783	75.4711	0.43967	7.07735	0.85243	4.22222	8.22247	173.097	2.50434	0.164001	20.5499	0.183287	13.5589	2.31178	46.4779	61.7728	6.73473	84.7894	38.1036	60.0228	83.0688	12.0125	122.593
TCGA-DU-A76L	0.0102343	0.0584724	10.7428	6.12962	0.0264782	131.594	57.2923	106.019	182.204	98.3054	47.9817	1.2596	211.632	59.7544	17.723	0.0046856	138.37	13.2317	153.306	36.285	282.332	381.688	107.519	7.23312	2.3192	18.3132	41.4846	34.5529	0.173293	2.06451	0.80723	0.0941904	4.6881	1.56239	0.661661	0.0744884	26.2943	0.140053	110.665	1.5357	1.06116	22.6046	4.09011	719.639	14.7294	66.4442	233.595	36.9432	61.5809
TCGA-E1-5303	0.0719799	0.0545453	20.2707	18.1282	0.0171938	55.7346	28.1863	6.71625	68.0034	97.4046	39.202	1.97132	185.316	81.257	13.9167	0.0555632	183.087	15.5566	125.021	19.4411	411.789	172.624	85.8794	41.1569	10.4329	24.6221	28.6512	55.7415	0.228651	3.77377	0.816918	2.04889	3.61047	177.802	5.20741	0.119452	41.8212	0.234604	30.6049	2.45485	14.111	88.7179	5.89663	180.896	40.1275	74.7196	211.903	18.7316	107.866
TCGA-P5-A5F1	0.0577003	0.432296	65.6187	83.4456	0.287007	133.507	630.457	270.966	193.902	78.5303	46.8729	11.7634	309.847	88.8213	27.2509	0.0830513	220.413	15.9734	135.91	274.445	2577.63	267.874	197.167	33.9972	10.6655	28.8116	68.9298	75.4657	0.165809	4.43344	0.928886	3.63587	2.96255	56.8183	23.4094	0.414049	78.2863	0.0683052	88.1876	2.77575	4.3048	78.1239	19.5305	157.022	68.3284	61.1001	459.164	37.7303	51.4496
TCGA-DH-5143	0.0898811	0.0854998	62.8607	16.1542	0.0246993	48.838	38.8916	11.511	100.63	64.565	36.974	2.76148	216.04	87.2836	9.59336	0.064803	153.326	15.7957	104.02	18.3344	423.42	146.33	103.842	43.9506	6.16417	23.0154	27.9475	78.9914	0.193668	3.87063	0.850221	3.35307	4.38607	232.016	14.0882	0.178657	55.7208	0.176886	21.9162	1.97671	11.4446	59.6258	10.694	155.785	37.6626	61.7226	162.282	14.4206	97.2089
TCGA-HT-7609	0.141882	0.00969837	15.6938	0.809568	0.00323758	11.5486	7.75909	1.10781	21.9175	88.4981	18.2727	0.443069	150.713	77.5308	3.43282	0.0279044	53.2372	15.2928	72.7118	2.69339	27.7742	72.7228	28.8101	16.2345	10.7107	20.0497	18.4842	42.8678	0.281183	4.01004	0.808925	1.24836	4.22077	428.756	0.586402	0.0198156	15.0693	0.16712	8.23851	0.696995	51.129	54.0902	4.962	36.9607	19.5947	56.0296	170.128	10.8686	102.473
TCGA-CS-6665	0.0167048	0.0127534	6.81653	0.740758	0.00493465	36.6764	5.68584	5.4098	17.0713	23.7066	27.7571	0.336429	141.269	62.1815	3.52166	0.00700554	41.6897	14.3738	96.3385	3.59597	126.418	68.4297	26.7793	11.7575	0.225237	21.8966	8.82857	22.1679	0.155879	1.20535	0.806786	0.227506	1.46751	7.32825	0.703475	0.00943499	13.6066	0.193587	9.03347	1.67579	1.58267	8.95974	3.51174	115.066	20.719	39.5687	26.3291	14.1816	21.5423
TCGA-DB-A64U	0.0475311	0.00779039	26.7988	0.811024	0.00534237	18.5666	8.33148	2.73833	25.7103	37.6793	20.0348	0.742051	159.802	95.585	4.11731	0.0410676	57.464	15.552	77.1935	3.65173	49.6113	55.6585	51.9444	19.4596	2.40251	20.7235	11.0989	13.6133	0.0779125	1.9742	0.805653	0.597374	2.74431	41.587	7.17893	0.0205029	12.5036	0.054874	10.6513	0.608965	5.5638	17.9927	7.6199	46.9625	14.5245	56.8111	44.5197	10.2526	27.4372
TCGA-E1-5319	0.252484	0.0502757	18.8123	14.8819	0.0243569	25.7573	12.8156	6.19444	62.372	118.071	34.2352	5.71848	169.804	80.9852	11.1261	0.179907	116.046	15.1156	80.9338	30.4665	141.994	275.966	74.1594	27.7456	21.2554	20.6806	22.4755	43.9713	0.221668	6.91092	0.788782	2.34021	4.65317	350.572	11.2331	0.210096	46.2524	0.159475	29.1947	1.76555	48.7055	96.5726	11.4039	105.775	29.2418	59.2897	200.312	12.6727	99.6813
TCGA-DU-A7TD	0.0146874	0.025733	4.72399	3.14074	0.00884239	16.8112	0.502992	17.8744	36.7531	34.0619	18.5956	0.316853	202.355	60.0984	4.00942	0.0104951	44.2767	14.2345	122.892	6.56754	87.0257	107.817	29.8401	3.45178	2.81115	18.0159	23.0581	105.22	0.485634	2.70015	0.871162	0.638587	1.61887	16.051	0.16991	0.0376889	9.06957	0.0946263	11.7705	1.34057	1.57834	15.7792	7.91603	57.1782	8.27009	31.8716	59.9896	6.55353	29.7368
TCGA-TM-A84T	0.0242981	0.00466833	13.4621	0.278353	0.00251836	21.4098	24.3169	2.33276	17.0557	27.5705	22.8242	0.453869	172.297	94.5181	3.02122	0.0112333	27.8838	15.8218	95.9837	2.69965	47.0863	42.5517	43.9465	24.8325	0.66352	22.4099	11.1078	13.7213	0.0831602	1.35627	0.86002	0.383545	2.19019	34.3889	0.87782	0.00777741	12.4691	0.0959831	7.98471	0.463635	4.1738	7.78745	4.24531	35.8276	17.8854	58.785	55.5783	12.9592	27.8346
TCGA-HW-7489	0.178362	0.078692	83.5538	22.6816	0.0269491	34.8608	3.93264	5.43761	50.8076	84.1135	20.8177	1.43524	215.933	79.6931	9.83642	0.137491	166.086	15.4734	76.1893	8.051	279.142	124.573	80.0366	22.9684	8.004	19.4061	29.9324	110.815	0.360103	10.9485	0.810767	4.34047	5.36521	300.191	33.4417	0.425969	54.1934	0.302734	14.6327	1.65011	21.0771	90.173	16.5668	107.643	19.5154	42.6338	126.033	12.7293	118
TCGA-E1-A7YI	0.00509335	0.00278157	8.83156	0.112266	0.00548492	161.726	284.921	69.8457	37.6865	16.0071	26.3452	0.339532	395.881	111.599	5.63293	0.00483414	54.6233	14.794	250.888	1.62956	495.818	51.409	76.4002	9.59705	0.0275527	20.1605	23.6076	5.43626	0.0302578	0.959964	0.848379	0.0712563	0.656814	0.584233	1.96796	0.00386767	12.6415	0.0567563	35.7272	0.185648	0.254479	2.3753	10.7215	55.216	4.3348	79.9475	24.7576	42.353	3.56635
TCGA-DB-A4XC	0.123203	0.0218484	45.0774	3.67746	0.0135741	27.9343	1.82179	2.84418	26.8719	64.4731	19.6501	1.01264	176.509	89.3014	6.27082	0.058405	100.396	15.5691	71.0508	5.36961	162.954	123.339	37.1634	11.153	10.087	20.3826	17.1141	61.6535	0.252552	4.43586	0.918268	2.61318	6.42599	226.714	6.40732	0.0950288	22.5652	0.14731	9.88371	1.23821	17.8085	67.3761	8.22536	61.0844	15.3674	45.8777	69.2956	13.6199	73.0669
TCGA-FG-A6J3	0.00691522	0.00780307	7.59947	99.6645	0.0160853	722.888	7103.38	582100	527.95	66.8683	95.4205	5.67015	553.713	92.932	14.5742	0.00297551	759.682	15.3195	538.821	421.745	6124.06	125.71	705.523	63.7407	0.00673108	38.1354	25.8997	5.52175	0.0241546	0.174362	0.590758	1.00714	0.407098	0.0508501	1.21666	0.0179585	35.7452	0.0495798	305.686	5.96829	0.255961	6.67565	3.02864	2698.18	47.4193	54.2306	263.141	109.523	16.9182
TCGA-HT-7858	0.0496738	0.00997295	7.86182	2.58299	0.00443112	23.069	18.7894	2.97832	32.0414	66.9626	24.3313	1.22936	179.038	89.0529	5.82835	0.026088	80.9438	15.6698	99.8484	7.08949	118.171	147.18	35.0102	18.9054	4.75173	20.9492	17.0984	21.3324	0.129865	2.01042	0.811726	1.34828	3.86884	61.7812	2.41916	0.0112325	20.0433	0.0945671	13.1524	1.18006	12.1648	31.9421	3.99561	73.9854	17.8997	57.0879	157.095	17.8269	67.5981
TCGA-HT-7877	0.210981	0.0234436	59.7453	3.69232	0.0129	14.9139	1.39456	2.35893	20.7421	68.608	20.1617	0.940174	151.445	81.2045	4.29288	0.0865224	61.4962	15.094	60.4558	4.54876	57.8524	87.2094	46.9614	15.0175	8.59343	18.1881	17.5769	41.4645	0.260311	6.15979	0.934182	1.68443	4.48537	308.668	8.23135	0.129434	21.7037	0.146398	8.98612	0.916592	23.3204	61.5756	13.3541	55.0403	15.8718	51.9907	51.6298	8.08853	73.4202
TCGA-HT-7884	0.266938	0.01295	19.8584	2.28689	0.0102163	7.14851	0.335001	0.863148	12.7152	91.2547	15.393	0.641222	171.766	99.1089	4.70706	0.0930146	41.1635	16.1318	64.8633	3.46568	38.101	101.706	21.2168	13.2154	44.7127	19.8728	20.4351	36.6866	0.37374	7.9885	0.946596	1.14604	9.8468	439.672	4.65895	0.0640022	14.6126	0.12414	6.60622	1.16196	52.614	103.924	8.19099	43.5313	15.477	45.5355	40.9002	9.51798	100.815
TCGA-HT-7478	0.118482	0.0489153	143.934	13.6816	0.0180569	48.2313	51.2647	29.9988	55.2547	72.5079	35.0672	1.3007	169.044	62.0172	6.54132	0.0279577	187.058	14.208	97.7335	15.0004	487.66	163.281	49.1692	9.5053	1.55065	20.2222	13.889	43.6437	0.169994	1.79761	0.871497	2.01117	1.9883	72.5484	1.75384	0.108293	48.7498	0.101169	28.7931	3.34158	20.369	30.9839	6.44597	130.142	20.8765	55.5593	90.6803	14.6717	94.8332
TCGA-HT-A616	0.573074	0.144458	134.192	14.4305	0.0376535	32.1722	1.92272	3.14611	29.4834	95.2697	22.7779	0.588067	179.073	75.7129	10.9586	0.122039	147.359	15.2611	59.8899	5.12786	168.488	122.381	84.7933	20.7881	21.7649	19.2524	41.1832	155.229	0.921245	22.0629	0.872996	3.90795	7.15181	766.702	20.1661	0.805789	41.4053	0.43263	11.5599	1.22215	59.2974	159.729	26.862	70.5895	24.6059	49.2137	109.048	9.89111	121.89
TCGA-DH-5142	0.0187969	0.00841565	53.1768	4.47821	0.00525422	73.7059	729.78	52.2789	138.261	23.0924	20.2988	0.915586	180.247	71.438	4.21659	0.00700309	156.414	14.7693	117.764	6.33424	625.033	67.8157	87.8932	10.1621	0.0645495	23.8477	7.91991	12.624	0.0455756	0.430533	0.67968	1.16424	1.0173	3.78458	2.71152	0.0132536	19.5196	0.0549454	41.0864	1.41123	1.93774	9.46472	3.98759	122.743	12.3815	39.4529	70.7249	19.5489	19.1429
TCGA-HW-7495	0.166748	0.0851913	156.124	21.8878	0.0549005	57.7982	29.3173	15.5345	78.3746	60.4681	23.138	4.54601	182.32	79.4181	11.0175	0.110496	116.42	14.5113	70.6804	11.9682	480.452	136.455	128.511	20.5926	2.03386	18.2723	16.8371	49.0623	0.122784	5.16632	0.818365	2.62455	2.82457	164.182	83.8965	0.24337	39.2917	0.105205	28.865	1.11672	9.85091	52.9147	25.2275	104.985	17.7445	57.7682	81.1611	16.6917	56.5153
TCGA-P5-A72X	0.454001	0.0148562	4.06899	1.33852	0.00468356	1.5855	0.0357754	0.338295	4.01005	111.467	19.5655	0.201286	177.846	81.528	3.3784	0.0810698	17.1301	16.5803	66.8317	2.52493	1.12297	95.7945	6.86896	15.9251	296.255	22.7868	20.2755	49.9594	0.650335	16.9373	0.930242	1.80712	16.9633	1006.61	0.147962	0.0667379	10.2059	0.252628	2.76474	2.06897	151.314	155.472	4.39631	23.9179	29.5595	39.6111	104.427	5.34329	171.919
TCGA-FG-A713	1.79536	0.247214	80.9381	24.5411	0.0251119	10.146	0.0116023	0.707636	11.7442	205.762	16.7039	0.388289	181.492	79.7612	8.67704	0.394911	117.365	16.0197	62.2093	3.35658	19.3705	96.1952	38.405	26.9264	68.4639	17.7468	26.3681	173.944	2.42325	40.5597	0.780134	5.2958	16.5163	1681.84	18.2594	2.42546	36.0774	0.80274	4.75001	2.67557	146.744	274.615	19.1839	87.674	20.7424	32.0891	70.0242	8.36772	282.423
TCGA-S9-A7QY	0.371828	0.0285897	24.2552	1.32891	0.00488429	5.91176	0.0292215	0.41265	5.2076	149.224	21.1451	0.249877	165.795	98.3094	4.56494	0.122437	48.838	16.7347	72.7364	2.20863	8.16201	72.5156	31.8353	34.5215	43.107	20.7028	16.3649	59.4553	0.719629	10.0523	0.886558	1.03417	15.0026	1021.05	1.77478	0.106507	11.8342	0.379068	3.88441	1.54945	51.5698	92.6225	7.62661	51.6083	28.3951	45.3148	39.5978	8.24623	199.788
TCGA-DU-A5TU	0.0389391	0.011574	23.3909	4.35705	0.00703371	43.037	29.6794	12.7329	35.4033	72.1604	23.2604	0.568041	226.644	84.94	6.8932	0.0166027	108.998	15.6384	162.348	7.42635	316.855	68.4193	64.9845	16.7476	0.546906	22.7763	16.0633	28.8453	0.129772	1.40538	0.813309	0.781555	1.68673	23.2139	1.11848	0.0310086	16.1692	0.115153	18.5421	1.89526	4.4103	16.434	3.67451	85.5056	19.3631	35.199	100.201	19.1553	59.4052
TCGA-DU-A76O	0.049363	0.00881181	16.124	0.776119	0.0031655	11.6978	0.476851	1.21823	9.62468	41.2225	18.9393	0.163632	195.625	88.1014	3.31687	0.0253876	36.1199	16.3586	94.6124	2.18129	33.5756	51.6613	27.879	15.1903	4.61544	22.419	11.229	18.0835	0.1702	2.46082	0.813017	0.812784	4.6812	59.1399	0.76071	0.0248221	12.1851	0.124976	4.1032	2.58581	7.31492	19.6568	4.51474	44.6359	17.3533	27.1873	38.5296	7.27166	65.3667
TCGA-P5-A5ET	0.121834	0.0164137	54.7077	2.35511	0.00763282	15.2954	3.34879	2.2774	31.185	66.323	19.9085	0.667413	187.662	98.0292	4.32379	0.066059	77.6768	16.0887	78.0388	4.40058	60.0388	65.8759	56.7446	23.8596	7.46272	21.6731	15.042	25.2608	0.160521	3.2751	0.810852	1.63254	4.90007	171.064	8.75703	0.0622113	23.5597	0.0879924	9.82977	1.07044	15.0029	46.9016	10.2194	65.5104	19.5718	42.4442	46.1068	8.61574	56.1789
TCGA-FG-6689	0.469755	0.0688056	83.0277	17.8468	0.0167467	25.5501	3.93634	3.16307	46.2738	135.397	24.2113	0.999739	169.591	80.7236	7.96534	0.0868547	162.883	15.4494	89.9146	8.99622	218.779	166.66	58.6835	19.7104	20.9285	20.7707	26.2276	96.9688	0.472421	6.97023	0.824163	3.89382	6.91144	538.227	5.44772	0.243359	37.3113	0.274843	15.2941	1.48726	84.7591	150.457	9.70359	136.138	22.1535	48.3323	94.7877	12.2088	187.628
TCGA-S9-A6WQ	0.114291	0.0324118	24.6817	3.43722	0.007589	23.3225	7.15582	2.07125	29.0626	93.4161	27.6292	0.659127	196.121	95.7643	6.19063	0.0319991	87.1748	16.6123	134.075	7.73598	136.78	86.3195	51.3043	31.6686	5.7428	24.6027	12.2768	35.1544	0.224697	2.41365	0.836947	0.808396	4.6647	100.695	1.92436	0.0651625	17.1867	0.184641	12.439	2.02542	18.6355	35.9586	4.88229	89.7839	30.0754	45.4991	68.9644	16.2373	116.452
TCGA-DU-7302	0.084281	0.0266736	106.252	28.2228	0.0430377	73.7987	43.5044	48.2909	88.482	27.4824	19.7181	8.35871	156.224	75.4418	11.7194	0.13428	231.108	13.8757	65.1444	11.1793	499.593	185.876	157.146	26.7166	1.21507	15.8027	25.2863	54.3233	0.111943	5.74167	0.765162	5.17347	2.52174	87.0312	147.038	0.138861	78.0438	0.088471	31.0799	0.814777	7.7136	28.2165	24.8098	127.012	12.3602	59.1349	75.7947	21.3856	27.8815
TCGA-HT-A5R5	0.0472501	0.337478	49.6569	59.2919	0.1555	73.7176	45.2459	27.4394	129.72	107.588	34.0657	5.382	233.001	78.2833	14.3011	0.0970508	171.416	15.543	104.568	47.4295	976.558	200.108	115.585	21.6533	6.84943	25.3166	36.5685	145.929	0.288226	5.80232	0.960686	2.98652	4.82386	184.884	28.3247	0.585441	39.9797	0.162151	35.2964	5.49093	4.73325	79.0332	19.2023	197.39	47.3937	49.534	108.325	20.7514	77.043
TCGA-TQ-A7RW	0.037152	0.0109065	36.4946	4.16614	0.00531283	38.5029	49.7779	5.6897	27.869	42.8988	17.6055	1.11398	161.279	79.7363	5.16442	0.0177322	93.3841	14.7919	88.1898	4.79992	255.559	79.1503	56.5212	17.0554	2.1276	19.8085	15.9004	17.0948	0.0851679	1.54232	0.82579	0.87101	2.22912	54.4111	6.98944	0.0122483	21.2705	0.0552776	13.1818	0.598155	4.65874	21.8441	4.54299	49.2904	16.083	64.733	102.062	19.4212	43.3175
TCGA-P5-A5F0	0.46002	0.0317593	53.1124	7.7643	0.0115137	8.36883	0.122781	1.30039	14.2943	95.8915	13.6625	0.408666	171.863	82.6979	4.85855	0.138994	70.8859	15.5247	56.0414	2.86958	21.3949	92.7241	39.7429	16.4023	19.9526	17.9722	15.6544	63.3168	0.496329	9.4769	0.730708	2.9177	6.53489	579.943	9.09419	0.202566	23.453	0.189603	5.31923	1.40796	56.855	90.6871	13.9264	53.0399	12.9835	36.6397	53.8039	6.99546	118.24
TCGA-S9-A6TY	0.313448	0.00880095	5.83682	0.835287	0.00262663	2.17812	0.031458	0.312141	3.55988	109.49	11.9041	0.248245	140.509	83.7036	2.76821	0.116417	37.0325	15.808	58.428	1.62491	1.13204	95.1279	20.5255	19.5939	79.3357	17.2609	22.998	45.3247	0.631616	15.5336	0.766818	2.3556	12.1387	1611.17	1.273	0.0282925	11.5025	0.236499	2.44929	0.718909	103.647	76.3276	7.52726	21.3245	14.3912	45.4123	103.847	5.09535	159.041
TCGA-FG-7638	0.61043	0.0228098	11.2688	5.41898	0.00730944	4.09912	0.383208	0.890481	17.5508	103.823	19.5137	0.563331	150.273	72.0281	4.67698	0.121318	34.839	15.4027	62.913	5.55832	5.16999	121.445	26.2874	21.5981	83.631	20.3705	26.9822	54.1888	0.5093	15.6979	0.809692	2.94414	8.12005	1320.53	2.25274	0.15338	22.2782	0.225814	7.00323	1.41677	138.755	118.769	8.69481	47.6744	25.7787	48.2474	126.273	4.74474	141.901
TCGA-S9-A7R1	0.291948	0.0161415	7.9469	1.28016	0.00362802	5.72205	0.327527	0.439824	9.5674	165.94	14.0166	0.279282	150.05	101.995	3.72096	0.120148	76.4868	16.6469	65.8935	1.73613	2.29808	77.8225	30.9923	31.8177	42.7513	20.5221	19.6668	71.6888	0.729383	10.4289	0.816568	2.18342	11.4721	1991.43	2.13381	0.0763573	13.5905	0.253896	4.13595	1.24488	91.847	108.96	6.65835	52.5496	20.5993	51.6104	68.0441	9.04714	165.202
TCGA-HT-7605	0.553154	0.105514	109.539	25.4708	0.0497007	21.6408	5.14223	6.19447	53.695	107.281	19.8193	2.57876	163.326	70.251	9.29239	0.2123	121.035	14.6766	60.7624	12.8975	230.984	184.099	91.5919	19.3188	22.9646	18.097	36.1405	91.8481	0.421365	16.847	0.794291	5.11424	7.44831	666.417	32.8404	0.591032	56.5725	0.189989	19.3059	1.35942	48.7533	144.635	25.5533	95.1379	20.7996	43.2994	149.116	9.61911	115.863
TCGA-S9-A6U8	0.0716848	0.0198614	24.1339	5.00069	0.0116964	34.4789	14.5756	3.74324	41.6012	55.7947	24.9253	1.22697	190.156	92.9355	7.12431	0.0328197	79.7698	15.6961	88.0207	8.03039	146.24	110.938	43.9151	23.3407	7.30465	22.2425	18.8277	37.8415	0.167999	3.14661	0.851183	1.24744	4.34156	76.7935	5.09102	0.0359937	23.3689	0.130803	13.3026	1.47292	9.61146	36.152	6.78156	69.6201	23.3018	53.0058	98.8132	16.6799	62.1344
TCGA-HT-A5R7	0.237839	0.170164	180.11	34.1204	0.0515576	47.2686	2.22533	7.78816	35.6777	93.2371	21.7322	1.39004	200.168	73.0765	10.7533	0.123573	164.961	15.0754	75.0477	8.21337	416.479	110.846	83.5339	17.7683	4.5687	18.445	21.0247	134.674	0.44205	10.0168	0.82741	3.45332	4.08789	194.939	38.5243	0.671261	44.5887	0.247179	15.308	1.93687	15.8809	95.9761	25.4206	101.535	18.2544	36.4976	62.2675	14.6768	93.5325
TCGA-FG-8186	0.0686434	0.0350111	63.901	16.197	0.0337093	49.9457	46.2467	35.5339	89.5879	66.8268	21.1686	3.35751	173.808	79.8841	12.9512	0.0990293	177.372	15.0987	84.2981	15.1702	594.388	153.516	130.869	19.249	2.53393	21.7669	17.7232	31.7549	0.0853376	2.54108	0.825049	2.49205	3.20412	86.0335	55.2408	0.0971713	40.8767	0.025064	34.8722	2.10525	6.75542	37.4263	14.446	93.3523	20.6217	46.536	77.6207	18.1131	36.7061
TCGA-QH-A6CV	0.0231287	0.178212	189.344	46.0726	0.0543032	141.764	72.9499	415.676	130.537	238.771	27.7062	1.88844	297.701	91.6585	11.6198	0.0198634	234.927	16.1108	220.591	38.9712	1061.52	187.966	301.391	13.9892	0.949271	21.413	17.4105	42.5078	0.044045	1.16154	0.581492	0.184898	1.40714	3.47741	2.98013	0.109347	26.6694	0.0186064	35.9397	3.0027	1.83186	13.4572	5.32178	266.805	19.9328	35.7663	103.864	53.679	79.8843
TCGA-FG-8181	0.73576	1.03978	227.038	57.0742	0.0721101	30.2766	0.0910621	2.65787	24.8089	156.211	18.8143	0.880894	181.312	64.0872	12.8488	0.322988	272.43	14.7771	52.0632	4.61871	153.445	121.027	91.6692	20.5766	15.2448	15.289	48.4019	365.654	2.38285	53.5539	0.843243	5.33286	8.05376	1171.83	50.6371	9.8931	66.4478	1.0155	9.71805	1.89768	45.5275	210.173	40.2257	160.798	18.6745	34.5763	83.513	10.0032	252.308
TCGA-HT-7470	0.741222	0.132493	164.224	16.8318	0.0310499	22.9443	1.22128	2.70436	40.8531	122.291	23.8094	0.982688	170.559	77.0051	7.50451	0.121335	128.99	15.1289	66.222	6.93136	210.941	149.662	59.1134	19.2849	19.9931	18.3172	23.2267	146.644	0.783766	11.1039	0.892404	3.47167	8.06025	900.807	10.2565	0.785589	46.6848	0.435162	13.8364	1.16242	63.9509	195.354	15.7737	131.427	19.6396	51.7671	69.8865	10.1867	174.688
TCGA-HW-A5KM	0.00841107	0.103213	12.1683	14.4515	0.0425062	151.46	47.0827	198.272	142.807	18.0165	86.2607	1.79092	190.458	67.4044	22.3083	0.00908221	162.564	15.5401	137.11	28.2733	1454.68	209.267	89.8888	26.3488	0.173625	31.2621	26.5912	51.8364	0.186975	0.9373	0.968338	0.474159	1.416	4.19186	9.6241	0.0852794	31.8282	0.138695	58.0015	6.14374	0.910068	7.99804	3.04626	285.812	57.948	66.6127	82.6975	34.939	14.6948
TCGA-FG-8187	0.263734	0.0196083	5.90001	1.60872	0.00690464	5.57407	0.233893	0.558803	9.59384	96.4694	20.5441	0.592988	146.002	81.6841	4.74148	0.112567	31.6198	15.8129	59.0895	2.91897	14.9255	92.1231	16.6789	17.9426	56.9624	19.7696	24.6399	46.9133	0.456379	18.8065	0.825421	1.47981	6.19856	677.396	3.08606	0.0602383	10.3623	0.186741	5.37132	1.34691	34.4773	95.6026	12.8975	31.1606	25.0344	47.6584	78.4982	6.41728	112.477
TCGA-DB-A64X	0.127223	0.00658997	4.73937	0.864637	0.00255168	5.11896	2.2846	0.741214	5.42705	69.3434	17.0809	0.203051	185.959	85.6968	3.07226	0.0281975	28.3684	16.4595	87.0226	3.35984	17.047	72.3641	23.4675	21.2152	26.2001	22.7854	18.6324	30.6539	0.255922	7.4612	0.828225	1.28588	4.69755	366.311	0.351299	0.0184815	9.55836	0.151281	5.84091	0.92214	48.4638	34.1555	4.97447	19.9147	23.4168	49.0682	93.6817	6.56807	97.5105
TCGA-FG-5962	0.313266	0.15566	107.124	55.9883	0.0668799	37.4643	7.99808	6.98226	66.8497	95.5582	15.7491	3.46401	192.782	83.9709	10.066	0.247633	187.099	15.1509	61.2667	9.57743	261.931	226.743	96.0324	31.1224	17.4329	18.8371	29.7027	99.0282	0.418966	14.5647	0.763821	9.73112	7.82308	558.686	74.9238	0.605659	68.1355	0.26034	18.8693	2.04772	24.63	111.979	31.3049	113.707	19.9802	49.1932	129.651	16.5528	118.501
TCGA-DB-A64Q	0.0488958	0.00948924	26.204	2.70542	0.0112953	25.5833	43.4614	4.98209	69.2638	39.0597	19.7872	3.82008	161.659	106.254	4.1264	0.054573	227.39	15.1665	73.5578	10.8955	200.386	106.565	73.113	24.1188	1.66801	21.1602	20.5716	11.7433	0.0919497	2.87845	0.730435	3.0196	1.85548	24.6546	34.1873	0.0391855	21.3045	0.0126995	13.1913	0.627681	5.27946	18.5834	29.2975	51.3506	14.5576	55.5881	35.9707	8.54276	15.7708
TCGA-S9-A6U2	0.0725239	0.0283561	37.7957	5.12684	0.0238603	20.7189	14.4867	7.50236	60.8751	36.5055	21.8285	3.2782	156.114	88.1761	4.70962	0.0588143	82.0072	14.9979	68.7469	10.2885	80.3548	99.8395	66.2141	14.3641	3.04664	20.1241	10.95	26.771	0.0604221	1.62608	0.852654	3.43306	2.73674	89.2795	17.7931	0.114683	26.7973	0.0282534	11.1844	0.924201	6.6894	22.6748	10.8432	64.292	19.9102	54.2545	81.1127	9.7151	34.5363
TCGA-DU-7009	0.341609	0.0184267	42.2725	1.71623	0.00587531	10.7776	1.77654	1.18651	18.6032	99.4777	20.193	0.570481	145.868	91.4852	4.15962	0.0967985	66.6025	15.4565	68.475	2.36191	28.8094	95.8141	48.896	35.8428	12.814	18.589	15.2992	43.266	0.279312	5.73627	0.807125	2.29228	5.79828	611.813	4.47334	0.0567563	18.8208	0.188087	7.54495	0.677254	57.0782	58.3992	8.52155	49.664	17.4221	68.4338	71.7829	8.58195	118.923
TCGA-DU-7015	0.101156	0.0212146	12.8836	4.06702	0.00903568	17.9018	18.4359	4.03927	40.0986	42.6709	19.0643	1.19687	154.569	69.6614	6.35355	0.0335024	62.0299	14.9042	78.9702	7.80994	87.9578	176.495	39.8962	14.3587	10.6944	20.2899	20.5889	49.0632	0.252492	3.94375	0.76576	2.12797	3.99704	326.981	2.342	0.0399822	28.0398	0.157659	15.5312	1.272	27.7108	53.8433	4.71081	56.8854	19.1708	55.4584	219.217	10.9568	60.2721
TCGA-DH-5141	0.701248	0.0631598	25.5083	5.44576	0.00955515	6.92072	0.877385	1.21686	20.7716	146.818	30.5033	0.658136	172.956	86.3905	4.57376	0.131456	68.7165	16.299	78.9873	7.95891	18.4697	144.327	49.7672	38.2974	73.4275	23.3144	27.6319	70.9396	0.632129	13.2679	0.828562	2.48855	8.95842	1154.08	1.60857	0.205366	27.1316	0.270761	9.28327	1.75855	167.971	102.398	10.5024	58.8392	40.5884	57.3421	113.143	5.32132	231.783
TCGA-HT-7695	0.475439	0.0702144	182.133	22.943	0.0410959	28.655	5.0737	6.83683	49.7256	82.6073	18.1761	2.2356	165.685	70.9823	8.46404	0.172383	132.528	14.4346	56.5853	7.80228	211.774	168.366	87.9208	19.1816	9.02747	16.467	22.9915	75.9895	0.321609	11.1203	0.778498	4.84872	4.92164	543.473	44.9421	0.469998	58.2477	0.179379	16.1725	1.09842	41.8289	94.5392	23.6625	90.4667	13.8456	47.7098	106.938	10.3933	102.606
TCGA-FG-8189	0.477117	0.957068	583.278	184.807	0.799811	69.1087	4.87856	33.3881	81.6025	91.2608	13.6468	4.05579	208.106	58.3493	18.8743	0.300557	351.859	13.9873	46.2545	12.2763	725.279	219.156	188.728	15.2773	5.20957	13.4778	39.7895	259.941	0.901143	39.7274	0.721468	10.2146	4.80983	351.469	263.563	11.96	151.699	0.678264	27.012	1.89988	25.1192	128.086	65.0828	151.785	9.75805	31.6958	187.412	16.3723	116.241
TCGA-FG-A4MT	0.0155927	0.00231726	10.4447	0.369169	0.00144484	22.4596	34.7535	2.67475	19.2977	22.756	18.9507	0.472259	265.885	110.368	2.95466	0.0165664	25.567	16.9306	126.781	1.84322	32.9848	45.0226	33.0247	33.3165	1.07006	23.5102	12.2064	2.65306	0.047354	1.20833	0.795266	0.511622	2.08592	9.58957	11.8565	0.00254393	18.5984	0.028821	6.45898	0.977074	2.27704	7.11917	2.47527	27.5059	17.0908	49.0213	56.6601	10.463	25.6112
TCGA-CS-6666	0.0585563	0.0122691	32.5397	2.28529	0.00685673	50.6592	128.978	7.22091	24.9834	32.0274	27.8601	1.27806	226.21	94.9925	7.52919	0.0158776	63.6189	15.5097	128.016	6.23536	137.307	108.352	40.9997	25.7641	1.56621	24.221	18.3334	8.97336	0.100242	2.4148	0.907553	1.38173	1.9253	61.6747	3.76143	0.0163781	32.5628	0.0632583	17.397	0.443506	19.155	28.8362	3.28102	40.8201	20.8359	97.4314	137.328	25.7687	50.3608
TCGA-E1-A7Z4	0.0957635	0.00819479	4.85478	3.42767	0.00426443	8.25042	1.10904	0.93457	11.9976	54.5778	20.7603	0.471711	205.325	102.779	4.4209	0.049989	46.0999	16.7974	87.7565	3.99033	23.1808	98.3931	16.5757	21.2224	49.8831	25.3004	23.1398	29.7841	0.301241	7.09873	0.797312	1.81323	5.88569	130.971	3.13625	0.0247387	11.7343	0.0825896	4.84108	2.09563	26.4249	59.5205	5.81213	32.372	27.256	42.6157	107.99	7.28871	77.971
TCGA-DH-A66F	0.353885	0.0145743	23.8418	11.9151	0.0100035	7.0628	2.71256	2.08202	28.5109	105.711	18.6265	1.93841	154.419	88.4991	4.55792	0.245015	110.036	15.485	69.5607	11.2289	38.448	112.726	42.9257	23.7153	26.9569	21.8806	20.6986	28.1871	0.201244	6.19489	0.779818	5.58443	6.17179	347.714	10.8807	0.0860939	22.8277	0.0458269	10.4131	1.38557	82.5525	113.052	9.00924	43.9082	24.4769	48.6633	115.096	6.6036	75.1472
TCGA-FG-7637	0.147858	0.0108209	48.0973	1.94499	0.00576924	24.5574	12.5869	2.8899	39.1239	77.2381	14.8529	1.17357	139.608	90.4045	4.10747	0.0631443	128.221	14.5349	72.6026	3.27343	59.5606	106.961	81.7097	35.5838	2.28876	18.7684	11.0305	19.3081	0.100326	1.76839	0.70492	3.48781	3.15622	384.109	6.36798	0.0292643	26.7299	0.0724318	12.8496	0.506162	32.759	38.8021	6.42967	63.6642	13.3878	69.8955	87.4798	11.4663	61.0745
TCGA-HT-7468	0.0625003	0.0276958	108.831	5.7702	0.0224021	42.8624	98.9966	21.6902	138.776	36.7706	18.5446	3.56967	164.296	89.6272	4.66117	0.0343628	153.234	14.0475	76.1596	11.7434	245.456	141.22	132.941	12.9394	0.87317	17.9983	12.842	16.1346	0.0447614	0.864117	0.737278	2.56986	1.81427	69.2047	14.4864	0.0546224	46.2907	0.0292369	29.7176	0.267228	7.69761	19.4176	10.5622	113.361	11.2607	81.1504	77.9183	12.4392	30.159
TCGA-HT-A5R9	0.037024	0.00277236	2.03248	0.0252953	0.000713158	3.12432	0.144226	0.219664	2.12413	58.9452	10.1901	0.0824543	141.257	92.941	1.12467	0.0211849	28.0885	15.9063	75.4609	0.742332	0.067422	35.9508	15.3339	14.5305	5.92782	17.9434	9.12737	19.2278	0.290569	3.04631	0.838897	0.537543	7.83119	334.521	0.107747	0.00514066	3.15206	0.266735	1.81815	0.313337	13.6451	11.0961	2.00917	17.7897	9.51095	50.9019	67.3057	7.53343	80.2611
TCGA-DU-A6S7	0.212807	0.00718082	4.68144	0.645505	0.00351954	4.24249	0.230331	0.412969	5.13827	75.856	18.9291	0.18979	194.863	110.137	2.86641	0.0374107	26.902	17.4366	80.0719	1.8181	5.17406	80.1171	7.70451	17.6719	65.0195	24.8698	10.274	23.4796	0.23555	5.12655	0.857403	1.30273	8.81978	196.753	0.386153	0.0190411	10.4365	0.138898	3.16795	2.19447	57.2758	43.6841	4.10861	24.7598	23.3371	47.9189	53.6343	6.95549	114.985
TCGA-DB-A64R	0.0544281	0.00429805	20.8612	0.906465	0.00466595	11.465	4.5749	2.24563	29.8927	30.1144	14.3395	0.689603	157.807	103.36	2.75772	0.0442495	53.5062	15.6308	61.5349	2.87919	23.3809	83.833	41.8849	15.2095	4.116	20.5412	11.2047	11.9853	0.0887924	2.68539	0.743606	1.50024	2.97653	87.6831	11.1365	0.0154165	17.0855	0.0482347	7.7058	0.598295	9.79841	21.0824	6.42275	35.4158	11.2623	53.6371	59.534	7.84693	28.8051
TCGA-FG-8191	0.041367	0.0302661	11.741	5.56904	0.00939694	27.8642	40.3954	4.51224	53.8034	51.8156	40.058	3.34401	182.225	91.9039	9.14498	0.0539638	109.628	15.38	96.0678	6.22035	173.192	193.139	67.9786	25.0509	25.0598	22.4053	49.3645	46.8062	0.103287	7.17184	0.876563	0.889231	1.76463	112.795	12.9931	0.0273491	26.9468	0.056443	21.0388	1.54078	7.81391	31.7645	25.1287	83.0658	35.5019	99.3902	160.278	14.5822	76.1285
TCGA-DB-5278	0.140189	0.0443372	193.614	27.2033	0.0502386	55.6168	62.5599	27.6925	130.788	54.4716	20.9094	4.52087	195.937	84.4307	9.85653	0.0894019	155.148	14.7105	75.8423	20.9334	413.667	189.511	138.358	18.1409	3.1283	19.915	17.2802	31.3995	0.0894565	3.07273	0.723773	3.66392	3.06875	117.008	73.0585	0.20215	63.2167	0.047646	29.9095	1.15758	12.1002	48.2645	16.0535	154.634	15.703	46.3587	123.087	15.2799	45.2786
TCGA-S9-A89Z	0.0575508	0.043861	52.2632	27.0164	0.04022	109.659	47.5264	81.9722	138.357	64.8687	38.6251	1.8356	257.223	84.0368	5.79736	0.0120956	338.649	14.7816	151.068	38.071	1139.11	243.02	113.277	14.3809	1.56147	24.4914	17.8418	55.658	0.0897417	1.29462	0.702426	3.26163	1.97349	12.043	5.90522	0.0927713	35.6447	0.0789093	66.5336	1.63401	5.60271	32.8162	6.30523	226.684	19.6504	60.6046	89.0542	26.8242	53.2725
TCGA-HT-7601	0.0789727	0.0586803	88.9458	23.5532	0.0544741	54.6646	48.9754	88.6728	103.142	70.6506	27.6486	3.01556	149.409	53.3513	8.44326	0.0222603	119.957	13.7331	85.6993	39.5603	912.157	322.017	81.8058	8.64836	1.35887	20.5148	13.4349	42.0956	0.159703	1.56737	0.757992	1.53209	2.06581	51.6609	6.70491	0.116637	55.4131	0.115396	55.2421	2.35117	7.77359	40.5655	8.2541	215.44	18.4799	40.0543	147.775	19.2703	50.2157
TCGA-HT-7603	0.0827386	0.268731	656.228	120.978	0.286537	192.975	535.941	1052.66	220.909	62.1514	26.2433	8.69431	211.055	68.4798	23.4318	0.0967135	715.504	13.6546	84.707	42.2467	4037.87	219.107	510.12	33.6692	0.606293	15.7364	80.32	125.786	0.153053	13.4654	0.692432	5.65633	1.7026	56.8978	222.781	1.18182	174.536	0.189493	83.8928	0.613147	4.70748	40.6107	74.7451	274.281	15.8524	53.6081	230.304	19.5805	51.295
TCGA-HT-7475	0.170675	0.0234497	28.4519	1.8274	0.00489116	17.3996	1.17116	1.29255	12.5216	101.418	15.3314	0.246551	208.962	84.9479	4.20186	0.0704731	59.6779	15.5617	72.3016	1.9363	41.347	77.2544	38.5136	12.7339	11.4292	17.3567	17.753	44.0446	0.422179	8.0841	0.978802	1.58947	7.54973	297.007	5.27893	0.0443324	18.5427	0.273234	6.56698	0.898188	22.403	73.9213	10.438	45.5566	13.0982	48.5102	56.0112	9.57382	114.525
TCGA-DH-A66D	0.040798	0.00845496	34.2242	3.36264	0.00593096	35.4478	29.2445	7.85356	52.1523	33.991	18.9791	1.15661	196.974	87.2481	5.14516	0.0203604	73.84	15.6991	106.302	7.35173	174.084	71.9884	49.2731	14.1619	0.851721	23.1958	11.3752	18.9674	0.0884128	1.26742	0.905121	1.32006	2.6929	32.3021	3.68001	0.0197239	22.8698	0.0830055	17.1931	1.29449	4.93268	23.0494	4.76522	68.3947	14.9993	45.6915	72.7857	18.0837	28.4383
TCGA-HT-7480	0.146107	0.013984	32.7626	3.207	0.00785023	11.5358	3.20835	2.18517	28.854	46.0115	14.0648	0.963099	147.553	86.9664	4.04838	0.0673454	59.5735	15.0561	60.8588	3.62411	25.2434	98.2717	42.6843	13.8681	7.73115	18.2131	15.126	26.3135	0.131849	3.98294	0.827092	2.87423	4.22789	290.164	7.93	0.0422106	22.8374	0.0960238	9.36993	0.685762	22.6715	40.8456	7.96124	49.9663	13.3862	53.4293	76.7001	9.64501	60.1617
TCGA-QH-A86X	0.117645	0.0089843	21.7148	3.67415	0.00682937	10.5501	3.18347	2.22302	24.3484	47.031	15.8309	0.891271	173.783	91.5182	4.59322	0.0755519	57.999	15.5865	63.2969	5.06009	28.2048	86.6791	39.0085	16.4408	10.5358	20.9625	13.3005	19.7187	0.122577	3.80901	0.800633	2.36048	3.82032	183.706	10.7875	0.0446443	20.6164	0.0558684	8.38191	1.16719	18.2237	38.968	9.72041	43.4904	16.2088	47.4424	66.5749	8.67692	45.5049
TCGA-TM-A84R	0.660765	0.229067	291.528	48.8462	0.0705024	34.7329	1.25158	5.84834	37.9021	126.572	17.1676	1.51258	176.2	69.7642	10.9822	0.270792	244.317	14.6939	58.417	6.73139	249.636	162.521	121.411	24.311	12.2835	15.3586	36.506	193.79	0.812094	28.4797	0.770261	7.08995	8.39908	609.041	59.8267	2.22205	83.9106	0.50995	13.773	1.37166	42.9842	150.739	35.3137	125.934	15.2347	36.1926	108.468	11.132	200.874
TCGA-DU-A6S6	0.139732	0.035122	49.8203	9.75539	0.0129971	14.0574	0.505373	1.99386	25.0471	72.3555	16.2321	0.623231	238.885	99.819	5.52822	0.120269	62.4014	16.5129	70.3751	3.43128	27.8022	65.7023	56.5358	27.4177	9.50558	21.5142	12.6788	40.0398	0.242171	5.58692	0.78803	2.86972	6.34076	188.711	18.7295	0.154768	25.9776	0.169883	7.2781	2.67281	14.1786	58.0354	12.1474	63.8678	19.5531	33.1924	41.4096	10.5749	70.8792
TCGA-DB-A75P	2.25217	0.248411	24.0016	25.3397	0.030879	12.0944	0.010286	0.485975	16.8571	584.88	24.7838	0.430325	214.179	94.371	11.0586	0.313033	50.7343	17.3785	87.2969	9.99102	2.81503	98.7927	21.0388	33.5768	498.225	23.1924	37.2518	132.94	3.71905	33.1457	0.83063	1.71923	27.5059	3405.85	1.07987	3.73167	22.205	0.748522	4.88692	6.14449	482.449	619.576	8.95638	116.292	49.9369	29.9803	116.932	15.3692	346.9
TCGA-VM-A8CE	0.0760402	0.0112413	24.6074	2.06375	0.00573981	15.0088	5.17871	2.05764	26.1198	57.0521	21.5575	0.746711	174.254	94.5862	4.17789	0.0465711	41.988	15.8817	83.3373	5.05731	21.0623	63.7393	43.2011	20.8731	7.10341	22.0637	10.8886	16.6625	0.0991352	2.07561	0.847595	0.85068	3.76168	100.943	3.49804	0.0330984	13.5998	0.0708703	9.56017	1.23792	10.3448	31.7933	6.11461	60.6072	21.2753	47.1761	69.9613	12.1196	47.4006
TCGA-HT-7881	0.375726	0.165303	119.909	36.246	0.107327	41.0414	4.05554	7.95532	53.3207	98.4348	22.3876	3.32438	194.689	73.8698	12.9701	0.21471	132.642	14.81	63.0939	13.6584	461.259	183.775	86.7476	15.7024	13.6179	16.9651	29.8901	90.4611	0.41966	16.6166	0.8056	4.29463	4.92815	363.518	60.7772	1.02728	61.9677	0.207038	20.673	1.43116	19.5027	122.105	35.0942	122.49	16.5901	40.0637	121.754	14.926	109.971
TCGA-DB-A64P	0.448803	0.0105946	5.12181	1.47911	0.00392839	2.41794	0.151098	0.512181	7.82711	135.599	18.0096	0.350388	157.631	83.0238	2.68415	0.121107	45.5783	15.9395	61.5184	2.73932	2.91814	144.215	15.9252	20.4513	112.028	21.0907	22.8082	43.8587	0.573637	16.2922	0.825754	2.38559	10.592	887.354	0.784584	0.0483045	15.0833	0.186147	5.00346	1.22744	209.052	82.0612	6.14889	27.1977	21.9401	50.8171	161.331	5.03678	167.999
TCGA-HT-8105	0.0518256	0.0272971	43.3556	2.20535	0.0106496	37.6332	16.5321	3.62043	30.5478	66.7294	14.9578	1.60207	138.14	95.6538	6.27226	0.0947813	271.107	14.9824	65.2354	3.97582	99.924	111.114	110.929	21.1132	1.73679	17.6068	29.1396	38.7291	0.169758	4.9739	0.820883	2.47182	5.06372	140.461	14.0214	0.0819254	33.6297	0.127472	14.0813	0.600549	8.26075	25.6312	10.9384	67.156	14.7733	68.6869	61.812	16.2088	73.8995
TCGA-RY-A843	0.586069	0.0205542	7.66899	4.57697	0.00883931	3.97354	0.142572	0.730693	9.46648	104.955	15.9329	0.354844	159.564	69.2273	3.51113	0.0853723	31.2308	15.3535	51.7674	3.59834	9.23356	148.4	16.0603	11.8328	99.1326	19.4049	35.833	86.8407	0.830526	40.6365	0.849234	2.5676	9.66985	1163.08	2.1441	0.120466	15.201	0.225294	4.62537	1.34961	116.739	94.7595	17.4777	32.4866	19.6985	44.198	103.905	4.20223	132.628
TCGA-QH-A65V	0.173748	0.0605791	24.3309	10.2859	0.017707	23.4156	7.31439	2.81852	39.8538	126.494	28.149	1.65485	198.514	92.5245	7.13798	0.115413	94.7074	16.1306	91.4417	12.0563	164.215	114.445	62.4158	35.1306	14.3664	23.7809	20.1986	34.6766	0.239181	6.31617	0.788765	1.5499	4.91977	160.697	11.6988	0.130166	23.1925	0.143997	16.5973	2.00359	17.3364	56.7571	13.4607	86.2814	33.3249	52.1289	80.2651	9.92904	85.3173
TCGA-HT-7688	0.182975	0.11889	182.79	45.4317	0.0561865	70.5939	27.9576	24.6998	69.8471	53.2652	17.2667	3.93487	205.584	72.4458	15.3636	0.126726	316.83	14.3475	65.0909	9.13725	814.255	202.569	151.618	20.754	2.67229	15.5165	48.8646	144.891	0.374409	20.8675	0.804812	5.50386	3.357	181.074	132.739	0.379288	89.9897	0.26702	25.6556	0.868874	12.3088	63.5008	34.7435	106.671	12.1116	50.6905	118.487	16.1369	82.2082
TCGA-DB-5281	0.111102	0.0305883	68.7069	12.6772	0.0210893	31.8521	14.4519	7.66176	35.4342	79.2657	19.369	1.9804	209.839	72.9761	5.20039	0.0476716	102.985	14.336	66.1938	8.93611	201.413	180.257	59.2918	18.9131	5.51821	18.6812	19.3524	71.8968	0.247489	5.64373	0.838393	2.08375	3.97251	337.14	8.27435	0.110975	34.2324	0.201109	19.8507	1.14699	17.6727	43.9061	11.2617	86.7822	15.8936	60.9565	151.124	15.2412	91.9152
TCGA-DU-5851	0.514976	0.0987135	136.574	24.0669	0.0311469	31.6043	1.44423	3.59461	45.263	145.872	24.1244	1.4337	175.242	77.9761	9.76029	0.199181	124.323	15.3364	74.981	8.24759	218.477	145.607	62.468	19.4802	16.8823	18.1834	20.8277	105.467	0.589005	7.76255	0.906678	3.0595	8.7413	600.66	23.6227	0.592203	47.8731	0.4295	13.9984	1.66095	49.7892	164.756	12.7971	156.78	19.889	44.5106	88.1691	15.3308	175.585
TCGA-QH-A6CW	0.0628732	0.0107976	5.91852	1.80833	0.00376959	18.2853	1.91009	0.943234	12.5965	43.6616	25.2914	0.408035	248.681	110.938	5.98057	0.0333486	48.6743	17.0864	85.4565	2.39689	27.5928	62.4642	17.3974	25.7581	11.3229	28.7318	18.2917	27.1346	0.204663	4.38807	0.903385	1.89129	3.82411	100.949	2.08715	0.0159661	10.2141	0.0990663	5.10587	3.02181	14.9478	36.1488	5.9854	28.3979	37.0932	61.6517	63.8413	15.9389	53.0993
TCGA-DU-5855	0.0790362	0.0734618	62.349	38.5605	0.0259296	100.558	42.2108	18.5463	118.377	88.9625	31.2225	3.93929	254.439	95.737	16.3583	0.041321	220.321	15.6129	131.593	24.069	1100.89	455.892	162.711	23.3248	5.36603	24.9872	32.4485	43.5682	0.138818	2.90827	0.874121	3.36762	2.85101	136.311	49.1628	0.0751875	37.6626	0.0954275	35.2918	1.86122	21.2442	50.9334	7.1694	185.015	24.3372	94.9959	185.79	26.1565	95.7361
TCGA-HT-8107	2.43839	0.724247	288.845	35.5884	0.078769	17.1599	0.0264981	1.46597	15.4554	220.362	14.8751	0.682444	154.045	63.1611	9.79172	0.424715	130.278	14.6302	45.6995	3.38776	71.9247	147.758	54.8036	18.0748	37.7437	14.4517	30.4007	352.214	3.6965	55.6996	0.854872	5.27877	15.2545	2403.16	37.3431	9.44038	49.132	1.11505	5.85804	1.67252	146.432	369.479	30.593	112.908	14.6158	35.4809	90.2148	9.43956	363.638
TCGA-IK-8125	0.233904	0.0106634	12.7479	1.99411	0.00518805	5.64644	0.478461	0.961553	10.2243	86.8791	14.3368	0.442495	133.911	74.6712	3.77001	0.091123	45.5551	15.0522	57.3241	2.86366	4.18271	91.2067	27.8914	19.7723	31.4199	17.6713	21.4322	41.2922	0.427886	10.8874	0.810492	1.92646	7.39461	729.005	2.91214	0.0535937	21.4608	0.189053	4.79785	0.851836	52.3749	58.0834	7.90223	42.5836	16.5446	45.5853	100.18	6.49466	101.938
TCGA-CS-6668	0.0129576	0.00500149	31.0296	0.562384	0.00625934	52.0057	116.643	9.82012	55.6294	13.6829	18.4484	2.77683	168.979	116.068	5.99339	0.0349974	91.4186	14.9282	66.0756	2.45945	186.269	75.7368	112.514	22.4853	0.150722	18.2319	12.0368	6.82328	0.0484323	1.0881	0.733102	1.13599	1.39851	19.3449	57.9887	0.00925653	23.4696	0.0582683	13.3339	0.224406	1.15843	5.57369	5.60404	71.5856	7.96049	79.041	33.9432	16.6634	13.5003
TCGA-VW-A7QS	0.139558	0.00551201	7.44192	2.61174	0.00375995	9.00539	2.77899	1.60858	6.46082	109.783	13.9805	0.465477	143.548	78.8089	5.19377	0.117998	58.035	15.1078	63.9546	1.803	10.2876	108.327	42.9554	40.7303	12.4767	19.7292	17.1737	19.2392	0.129837	7.11344	0.632295	1.36832	6.18957	135.564	9.11472	0.0143632	10.6564	0.0499103	5.65372	1.59732	37.7495	25.2531	14.9419	32.0009	21.0224	51.4987	84.3166	8.33138	87.6877
TCGA-HT-A61A	1.61372	0.253113	192.928	23.4741	0.0552379	20.7023	0.0845668	1.73756	22.2423	188.703	16.8831	0.676488	163.597	70.1244	11.553	0.247197	175.484	15.1008	57.6387	4.96915	68.6895	129.892	65.5298	18.7315	41.1976	15.3603	37.8455	233.203	2.6849	39.978	0.77492	3.96511	11.3331	1333.7	18.8026	3.46676	62.2938	0.851097	7.6321	1.69687	95.5902	244.697	29.0202	134.467	17.4679	28.6187	118.708	8.90281	270.306
TCGA-TQ-A7RI	0.0954422	0.0168872	53.869	5.22637	0.0123103	20.4732	15.8572	6.33557	47.6588	58.2872	17.9686	1.28443	172.507	89.1021	5.21152	0.0655388	63.0969	15.3218	71.831	7.39579	142.53	105.421	69.1432	15.7333	3.56126	20.4094	12.0256	25.7494	0.109358	2.79783	0.83748	1.27384	2.82334	105.136	14.613	0.0498977	16.157	0.051067	17.3078	1.22348	11.1284	31.5901	11.7741	61.7486	16.1879	44.8102	73.7697	12.3705	39.8758
TCGA-HT-8012	0.123934	0.0224493	32.4444	2.22044	0.0103631	15.2966	1.85136	1.94479	31.7	55.3718	16.0077	0.716839	168.737	107.399	3.68557	0.0631396	82.8777	16.0239	67.3269	4.4056	25.8522	84.0583	55.1776	19.3381	6.88384	21.3796	14.8237	26.0544	0.1333	2.71696	0.791498	1.57663	4.96833	150.968	4.92279	0.0745518	19.5287	0.111168	8.98104	1.19951	22.4181	35.4252	7.68971	63.0987	17.2779	48.1409	47.2697	9.54776	63.3415
TCGA-DU-6399	0.0890235	0.0137987	23.2814	5.95482	0.00874894	31.6087	26.4189	4.36894	49.1214	45.4933	22.8666	1.59295	213.222	87.4671	6.22576	0.0457688	65.2187	15.3499	79.9788	6.54175	178.266	136.868	41.9985	20.5663	6.32306	22.2345	21.0433	38.1139	0.217873	4.68468	0.837251	2.77389	4.52238	167.774	5.58823	0.0286952	27.2929	0.13522	16.4489	1.21847	18.1426	56.0415	8.52336	59.1127	18.2067	60.0709	150.64	14.8666	66.8168
TCGA-DU-A7TG	0.685752	0.347293	194.789	26.265	0.0417566	24.5753	0.10397	2.10839	19.1066	160.909	21.7213	0.675923	172.921	74.8578	10.2793	0.245359	185.415	15.4192	59.9138	4.14402	101.71	116.318	65.4245	24.9912	20.8164	16.676	28.7071	231.112	1.60992	22.551	0.860366	4.8155	10.9017	943.649	25.5239	3.23161	54.2119	0.781215	6.71551	1.87134	48.6997	183.155	22.779	132.388	21.8551	36.0768	71.0658	9.83702	255.326
TCGA-CS-5390	0.0314861	0.0101118	19.4216	0.516642	0.00416764	29.4256	33.1651	2.63107	36.1242	41.3799	15.9802	0.920146	172.176	98.5535	3.96372	0.0346526	77.132	15.337	90.2988	2.67139	26.9781	67.1672	67.3722	30.3572	0.765551	18.7565	11.2265	15.1681	0.106634	1.81016	0.774985	1.15923	2.93037	101.313	7.42817	0.0168215	21.2404	0.132141	10.6335	0.349602	5.23103	9.95059	4.29728	51.358	11.3365	69.305	85.8662	17.8283	45.4775
TCGA-E1-A7YW	0.028842	0.0104334	41.2591	3.85114	0.0109689	68.7908	89.2703	12.5098	66.1963	32.2133	24.9217	2.04868	218.347	109.302	7.97208	0.0339727	135.516	15.9707	97.5036	9.62734	479.947	101.437	78.7724	18.5525	1.7643	24.6402	17.8943	23.6107	0.057557	1.98446	0.973714	1.97149	2.49515	34.7067	18.229	0.0224155	23.6346	0.0482016	24.7703	1.03025	3.26172	18.9478	12.2851	62.9729	24.4411	67.3834	81.4637	28.4345	19.5115
TCGA-HT-A618	0.234796	0.0221163	25.3041	3.05359	0.00870749	11.878	1.25928	1.96287	13.6738	102.114	21.5768	0.227873	128.062	64.627	3.25698	0.0249247	91.4184	14.9771	81.6589	4.76559	54.885	95.5925	24.9431	9.94299	13.6837	20.0839	15.168	54.5599	0.346806	3.40996	0.790655	0.844622	6.32626	97.8969	0.410832	0.0705541	19.1418	0.181137	8.60831	1.67735	36.6657	60.791	6.10763	88.1838	21.991	33.5353	60.1396	6.497	94.6199
TCGA-P5-A737	0.341864	0.00875675	4.17662	0.692783	0.00223449	1.21911	0.00919624	0.174561	3.9503	137.825	11.427	0.115362	151.282	96.3121	2.10081	0.11425	23.3516	16.7537	57.9943	1.03913	0.376553	55.0598	10.6452	22.4588	155.244	20.5145	17.8372	45.2701	1.14598	14.9582	0.779019	2.16527	19.1094	1951.45	0.210197	0.0364419	9.56385	0.500568	2.24756	1.35032	114.574	145.962	4.52687	29.0865	19.1789	36.2621	56.9038	4.96106	163.795
TCGA-CS-6667	0.240451	0.00896916	5.52319	0.988661	0.00400877	5.24724	1.16072	0.828958	7.45118	92.732	21.2601	0.479272	154.246	73.1874	3.6248	0.0467695	26.7469	15.5243	69.8887	3.90244	11.0287	121.68	19.9596	16.0905	47.6127	20.766	22.1069	36.8415	0.243221	10.7708	0.901812	1.11112	6.22908	463.914	0.316908	0.0271933	15.3894	0.158474	7.26652	0.828422	100.357	54.0457	5.83972	23.1935	25.5901	62.3204	129.612	6.02084	121.504
TCGA-DU-8168	0.0578974	0.0156442	133.585	12.7395	0.015551	52.8591	15.9326	19.0872	71.6546	22.1518	11.7695	6.54368	207.065	95.084	5.74624	0.0777123	229.814	14.4478	61.465	6.47079	509.647	132.375	138.473	19.4254	0.267327	16.495	15.8146	24.7332	0.0829902	2.59895	0.785169	4.61207	2.62999	75.4163	65.1109	0.0277677	59.8962	0.0497118	25.6494	0.440732	4.62318	22.7415	16.7224	59.3158	4.92013	64.3018	56.6661	24.5786	19.1372
TCGA-DU-6392	0.0357634	0.0153495	12.9801	2.51724	0.0101595	50.5186	48.6596	14.7401	55.281	44.4259	20.5839	0.583712	295.133	74.8767	4.94588	0.0206927	62.3679	14.5048	122.042	5.01334	195.437	105.694	51.3066	6.26305	2.55833	17.404	12.407	25.4021	0.127509	2.29776	0.853825	0.729479	2.33394	24.8439	3.66498	0.027667	40.3181	0.132712	18.6044	2.73105	3.54201	18.7883	4.86012	95.6528	8.01536	39.1253	73.3687	17.7927	60.5059
TCGA-QH-A6X5	0.437759	0.0152162	5.36845	2.50798	0.00463554	4.2912	0.131184	0.379517	9.80634	142.012	17.0024	0.328976	162.946	99.8772	4.81608	0.161484	31.0296	16.8585	81.1333	2.75818	3.82795	77.6358	15.4102	26.5874	80.4295	22.1694	20.2353	37.8166	0.565388	13.1115	0.747754	2.41232	9.73375	735.011	2.90093	0.0607409	9.20904	0.171373	3.72519	2.02062	77.8211	108.13	6.91155	41.9799	22.8061	38.4657	76.1176	6.98927	155.071
TCGA-HT-7471	0.018077	0.0139975	55.1829	20.6994	0.0234617	96.0063	587.545	192.725	146.409	25.2786	17.8269	6.37108	237.547	91.0915	8.81208	0.0363971	219.862	15.0234	131.243	22.1894	1040.52	132.097	183.614	15.2567	0.189128	21.8209	17.6813	18.8243	0.0566427	1.04123	0.764564	3.2957	1.82188	10.1834	32.8639	0.0324451	46.7993	0.0388378	70.1932	0.978253	1.20781	10.0065	10.8826	99.6271	11.267	49.4254	91.0165	30.8696	14.6382
TCGA-HT-7473	0.260921	0.0452939	23.7434	8.40175	0.0157662	18.1641	2.77698	2.94571	39.108	111.67	29.4523	1.21723	135.968	67.2254	5.74438	0.0452212	93.9179	14.8733	68.6895	9.90215	116.562	217.124	35.081	17.2016	52.3069	20.4301	29.1429	111.715	0.536574	6.67196	0.886914	2.00946	7.96606	492.444	1.07305	0.0965722	31.8212	0.295138	14.2051	2.10111	52.6489	189.532	4.06553	94.6018	31.2791	65.1117	305.538	10.3455	176.818
TCGA-E1-A7YK	0.0790768	0.0244591	11.2476	4.50145	0.01129	31.9591	3.6809	4.47982	32.6594	121.802	40.0848	0.491569	187.999	76.8512	5.68534	0.0215328	75.3958	15.9397	137.493	12.0947	168.776	142.248	40.1467	19.2124	9.194	25.0385	13.9479	29.2977	0.195425	2.00968	0.860997	0.457903	4.99932	28.7456	0.578323	0.0630184	17.8713	0.240194	21.3555	4.35638	8.48686	56.7992	4.00291	142.81	37.4298	39.9181	111.513	18.7279	98.0005
TCGA-HT-8114	0.120476	0.0692938	267.604	25.8676	0.0497918	79.2677	127.201	46.3861	96.8933	78.9804	27.2379	4.82385	170.277	75.42	11.6049	0.050487	298.967	14.65	84.1445	22.8398	1202.38	175.847	119.451	17.892	1.72146	22.1226	33.1335	52.0587	0.139007	2.8838	0.820234	2.48874	2.47313	121.058	25.7243	0.212021	56.2784	0.0585527	42.6416	1.5932	21.4757	57.6221	9.19615	126.268	23.4744	72.0307	101.051	21.117	66.6794
TCGA-HT-7691	0.112	0.483216	29.1651	198.433	0.144596	129.933	80.9065	132.85	148.972	285.859	79.1826	12.4618	212.37	87.9232	25.718	0.0635524	243.073	15.4834	151.05	755.911	371.451	670.643	87.6658	144.906	11.7643	26.7089	66.1788	101.52	0.442621	5.58821	0.801419	3.73724	4.34444	103.282	10.9647	0.326719	64.1647	0.148844	52.7487	8.75142	8.78897	114.047	10.0672	421.553	148.852	72.084	666.804	44.3746	118.46
TCGA-DU-A7T8	0.0106631	0.00566291	15.3113	0.772878	0.00243213	46.0608	82.0432	5.44845	29.2977	25.2978	16.9304	0.617751	231.14	92.5856	4.78076	0.0101715	46.3689	15.5671	109.167	3.05726	141.621	41.6039	65.7449	16.1553	0.188072	21.3237	9.54181	12.623	0.0516981	0.816412	0.835521	0.656377	1.75318	17.7347	2.25391	0.00622076	12.8783	0.0541593	10.3071	0.940992	1.28358	9.19406	3.60778	35.919	14.897	45.9134	63.6724	26.976	27.7164
TCGA-QH-A6X4	0.111214	0.0124063	14.6672	2.62073	0.00502058	9.65719	0.616668	1.11248	14.5298	50.7599	15.0998	0.659985	189.477	106.938	4.93277	0.121802	49.3361	16.68	71.3917	2.82543	24.8566	80.9876	41.1255	21.91	19.7077	21.543	17.3677	18.5087	0.187595	4.89636	0.779426	1.52846	5.45917	124.252	6.52123	0.0352597	19.4691	0.139659	7.70681	1.5741	15.0098	49.9267	8.80055	34.4836	16.9221	37.9498	38.1328	10.5433	62.8827
TCGA-FG-6691	0.13882	0.0144886	11.6859	2.23795	0.00637123	12.5032	2.24001	1.91926	18.3919	69.3502	22.8656	0.650921	142.156	69.376	3.46743	0.0329311	43.3464	14.9228	70.7117	4.4926	70.1014	144.659	25.9526	16.409	13.5615	20.8185	12.6676	52.0142	0.340774	4.52378	0.790001	1.11373	5.16465	250.292	1.02873	0.0233777	16.1334	0.16925	8.40443	1.99333	36.9729	49.8085	4.27853	39.7516	22.9425	54.3425	154.997	6.72243	103.453
TCGA-TM-A84M	0.0330887	0.00657918	37.9321	2.65885	0.00658016	26.9206	36.2946	5.58734	59.1979	29.7146	18.997	2.37621	201.41	118.389	3.93423	0.0406602	134.177	15.6535	75.5841	4.8171	88.4111	70.9111	100.554	21.8215	0.50575	21.1195	15.9247	8.15117	0.0703521	1.91629	0.756414	1.49106	1.45204	46.3548	21.2261	0.0180356	19.6678	0.026242	13.4761	0.484772	4.44675	11.6947	17.0098	70.0392	11.8653	60.7256	37.5991	17.6977	17.1965
TCGA-QH-A6X9	0.404005	0.0210264	13.4139	2.78564	0.00791731	8.84261	0.0661505	0.694779	12.4366	84.0391	13.5836	0.6004	167.977	90.118	6.6569	0.103722	49.3296	15.9058	60.6907	3.37089	36.5162	146.911	26.4799	13.1892	56.3547	18.7372	30.2086	96.1903	0.986281	22.0467	0.843886	4.0456	11.404	1394.69	4.62304	0.0903977	16.8075	0.291197	4.98747	0.896389	81.0246	108.875	10.475	35.2588	12.0668	43.0662	101.817	9.04845	117.012
TCGA-S9-A7J3	0.0924082	0.0170779	36.6606	4.522	0.0129101	19.7472	5.45015	4.11405	37.4932	52.6893	18.4043	1.55749	168.188	90.9089	5.85184	0.0973987	62.1806	15.4087	68.2051	6.48156	87.492	87.3657	66.4092	16.3217	5.21256	20.3992	15.5912	28.4076	0.144021	4.15523	0.860657	1.67034	3.92933	110.046	11.4624	0.0856507	23.5211	0.0893317	11.9177	1.189	12.0082	37.2677	12.1589	58.461	16.9534	45.2653	54.4639	11.2282	47.7609
TCGA-DU-8167	0.128687	0.0100249	8.80993	0.461068	0.00301451	7.45338	0.647263	0.655963	5.77084	80.3981	20.1317	0.187887	152.286	84.0238	3.98784	0.0230584	45.266	16.1411	91.1053	2.23326	16.975	79.9806	22.0164	19.6315	15.1847	21.6265	13.7072	38.078	0.418199	4.53405	0.799627	0.588927	5.02913	236.602	0.178625	0.0217982	9.28915	0.30264	5.94132	1.029	34.2642	48.8392	4.28325	40.8164	20.1782	48.5153	76.7149	8.74682	118.844
TCGA-DU-6401	0.311567	0.0148782	4.59867	0.991538	0.00418216	3.27823	1.57966	0.593039	11.4748	101.972	23.2198	0.319265	158.346	74.3986	2.59526	0.0415854	26.9772	15.853	66.4778	3.19137	4.28756	112.928	16.1155	16.1515	91.9981	22.6622	21.2931	56.8129	0.452373	11.2842	0.926813	1.2291	7.66586	736.504	0.182097	0.0427789	12.2305	0.242837	7.36618	1.12522	185.8	66.9056	5.17249	27.6473	25.3649	67.8081	134.567	5.0514	168.951
TCGA-VM-A8CF	0.195593	0.0610753	13.1824	18.7583	0.0141849	60.7021	15.1502	4.75854	37.6143	285.039	36.9182	0.962178	233.307	102.161	10.7356	0.0313928	183.466	17.345	176.483	33.4581	257.447	175.234	80.69	42.4912	28.128	27.8256	28.3122	31.0517	0.225624	2.23635	0.790124	1.81642	8.25139	42.9944	0.466098	0.0551518	27.3752	0.391206	21.0873	3.66924	17.8724	109.272	4.28352	227.015	58.9239	49.4661	282.382	29.17	187.817
TCGA-DB-A4XD	0.0677318	0.0112919	35.6881	1.84845	0.00645182	30.9279	22.6974	3.35814	28.3011	44.4886	21.4056	1.51791	183.64	94.9444	4.63782	0.0265233	60.0961	15.1456	68.2545	3.85492	142.998	79.4722	37.7586	17.9747	2.3256	20.506	13.4115	28.2121	0.102803	2.46618	0.889425	1.25695	2.80666	111.133	6.2613	0.0177574	16.153	0.0770179	10.327	0.483307	8.60876	22.928	8.55486	46.692	15.7006	69.8061	61.467	16.127	38.5889
TCGA-DU-6407	0.0105628	0.00441046	9.8285	1.09293	0.00198553	77.0293	414.85	22.3839	33.3508	29.5241	17.4417	0.3703	249.746	85.9038	4.48704	0.00605712	93.392	15.5068	236.272	3.87842	638.751	47.2688	160.011	22.0657	0.0573136	22.7442	14.8153	10.22	0.0254942	0.835302	0.64369	0.713132	0.703219	5.32876	3.53751	0.00299836	17.2566	0.0345574	21.9026	0.459788	0.826191	3.90812	6.10851	38.0516	13.7391	53.0201	59.3733	24.6432	24.7026
TCGA-HT-7856	1.33573	0.263763	217.758	19.9096	0.0339165	20.4681	0.0470163	1.23721	17.2898	200.132	20.8387	0.608129	179.73	84.084	7.73965	0.305088	135.039	15.9268	58.2334	4.35623	82.1445	110.401	53.16	22.5739	38.6987	17.8868	20.9481	190.473	1.67626	16.9077	0.896133	3.51741	17.0376	1330.27	12.6437	2.70994	38.944	0.831205	6.96847	1.88187	92.6635	259.375	18.7134	125.877	21.5339	36.4555	57.1567	11.4743	288.994
TCGA-WY-A85B	0.0599278	0.00342853	3.18926	0.17845	0.00147619	3.89264	0.504965	0.57195	3.98004	44.1908	20.0155	0.126842	179.616	92.6609	1.96796	0.013953	22.34	16.3015	82.9142	1.42141	5.29609	66.9018	11.2774	16.4857	11.0701	21.0265	13.4403	18.845	0.20723	3.59804	0.832599	0.702681	4.8197	97.7125	0.143834	0.006119	10.4056	0.12754	2.73079	0.727641	15.0053	19.0186	2.52116	25.0938	16.1482	45.8455	68.5599	5.34256	87.7004
TCGA-P5-A77X	0.670473	0.0174612	21.9292	2.11933	0.00585002	3.66144	0.0212185	0.561309	4.75205	107.441	17.6537	0.269672	127.226	82.4866	4.19012	0.151965	42.8968	15.5939	53.2441	2.21445	4.89872	94.7561	22.4768	26.5876	54.831	18.059	20.7514	52.337	0.689559	15.4346	0.773434	2.71325	9.70213	1026.7	3.05145	0.109666	15.8087	0.249026	3.15931	1.1582	90.0948	112.921	10.7885	45.616	23.1046	41.0485	48.1307	4.53381	143.723
TCGA-HW-8320	0.0476999	0.0069955	31.9416	2.33347	0.00395994	28.5353	41.0066	4.7983	30.9125	33.4163	24.9493	1.31485	202.231	95.2597	5.56119	0.0264213	73.3318	15.5928	88.3548	4.54275	169.769	77.7091	43.4282	27.8242	1.48102	22.4443	17.8528	27.0242	0.102289	2.30219	0.896049	1.78294	2.2001	96.8538	6.83057	0.0127117	18.1504	0.0557587	10.0527	0.789451	10.4873	26.8286	5.63876	42.1193	21.534	77.366	87.1464	17.8039	49.9156
TCGA-QH-A6X3	0.187932	0.00732471	4.22885	0.709662	0.00379413	4.09834	0.562763	0.635351	6.19971	69.2714	16.4546	0.415047	144.806	72.8392	4.09067	0.0569688	32.6793	15.1985	51.4949	2.46444	10.3365	156.681	15.7945	11.7821	73.923	19.2803	30.1495	51.0671	0.399755	19.2624	0.825335	1.92286	7.80534	803.048	2.21408	0.0229501	12.184	0.130555	5.3908	0.591694	76.6804	68.5826	10.2819	17.8776	16.7645	65.1035	147.485	5.19561	107.056
TCGA-HT-7604	0.0265427	0.0270899	186.375	5.02301	0.0227355	149.898	2041.24	163.434	110.653	21.757	33.4372	5.0258	273.089	104.858	10.8045	0.0262612	186.614	14.9456	116.241	9.08363	2624.52	113.71	220.6	28.3018	0.0376712	21.5635	25.4221	27.842	0.0375334	1.38472	0.80238	2.86996	0.936134	27.7248	34.214	0.0219888	39.25	0.0298417	47.0757	0.346438	3.8038	7.47166	8.77425	45.553	15.6429	116.812	170.21	31.4428	25.694
TCGA-DU-7298	0.055935	0.0133221	72.6279	7.51194	0.0100966	66.9078	127.584	24.5322	61.3816	51.2512	18.9944	3.4328	198.1	77.7566	7.47946	0.0454627	145.677	14.6041	100.248	8.41025	626.308	143.537	111.544	14.6448	1.0512	17.1733	24.2422	17.6521	0.102143	2.57401	0.792683	1.19997	2.37613	37.0216	27.0794	0.0200008	46.636	0.0705892	30.913	0.424521	6.42177	29.7514	11.1881	92.3869	8.2232	53.847	87.7524	21.0923	34.2415
TCGA-WY-A858	0.489717	0.00768211	1.08805	0.241329	0.0019569	0.668912	0.00396293	0.176552	0.856931	145.324	19.8041	0.0565292	126.601	67.2984	2.20698	0.0342189	11.0158	16.2783	65.7366	1.72274	0.0402741	90.7961	4.94952	15.8781	263.643	21.7488	21.0386	39.5481	1.20919	21.1471	0.884627	0.5152	13.5166	1008.98	0.00674021	0.0270247	6.31884	0.484249	1.98755	1.77119	267.61	113.678	3.13188	23.4498	30.1086	39.1026	103.388	3.20274	208.591
TCGA-TQ-A7RM	0.0116837	0.00417421	41.4914	4.3012	0.00798088	81.1647	420.518	34.7358	78.737	5.30749	11.0343	3.95173	383.259	98.3023	2.96587	0.0167219	143.582	14.5081	129.507	6.08924	2602	72.3647	125.43	5.73954	0.00781465	18.4511	23.4913	14.0326	0.0634579	1.43574	0.867379	2.69938	1.26165	5.43092	84.8535	0.0074826	21.6859	0.0292623	39.2801	0.0179627	0.599838	6.05247	11.4529	26.843	2.82099	57.6232	52.9064	19.5791	12.546
TCGA-HT-7677	0.0252843	0.00800801	101.55	8.73108	0.0146871	73.3696	561.85	58.5601	111.481	22.1436	17.0123	8.23534	190.24	94.5353	6.776	0.0575023	168.173	14.4371	70.9176	14.9682	424.261	113.283	167.346	14.62	0.286188	19.3822	15.2	12.5396	0.0415959	1.23576	0.812706	1.82991	1.44537	28.5102	76.2197	0.0181046	34.2186	0.015621	34.1348	0.540325	2.08422	11.1073	11.3987	66.9226	10.6339	58.3897	95.6878	24.4201	10.5926
TCGA-HT-7687	0.0564864	0.0203311	49.5578	3.20016	0.0144903	36.6757	22.3778	9.39813	55.6435	39.0595	16.7893	2.41211	173.188	85.0197	6.86913	0.0618348	126.112	14.4688	62.6626	6.68995	128.839	128.763	123.363	15.0819	1.42822	17.8594	22.5938	32.624	0.161289	4.65223	0.790246	1.90548	2.47351	95.4927	23.2548	0.0562283	40.9976	0.102879	18.9094	0.538493	6.1051	21.9927	12.6205	75.8671	11.3752	57.0375	88.1671	15.0949	39.0211
TCGA-RY-A83X	0.154487	0.0126535	28.4153	1.81431	0.00688602	8.1456	0.900356	1.27867	18.4025	62.2542	19.5605	0.691157	163.857	111.816	3.54314	0.0704249	55.7878	16.5632	80.794	3.70989	29.6072	86.1108	34.7951	23.3518	11.2216	21.8926	13.2159	20.704	0.107894	2.92482	0.816451	1.35147	4.22657	133.973	4.89305	0.0464118	14.1838	0.0539333	5.87419	1.12787	22.3265	26.1957	9.38615	46.6144	20.0186	46.7937	33.2417	7.09647	57.3596
TCGA-HW-7487	0.369861	0.0834159	143.999	17.4789	0.023601	31.7632	4.66325	4.8283	40.2934	107.88	18.374	1.6097	153.124	79.4526	8.85265	0.183867	219.977	14.9619	67.9561	7.56407	224.03	141.657	117.633	26.1261	8.26061	17.3273	31.8161	116.088	0.471142	10.7395	0.805329	4.40484	7.05424	548.165	35.5107	0.447117	53.7975	0.317842	17.3194	0.890367	36.3715	82.3401	18.3925	107.386	17.7307	52.6842	89.339	11.9528	143.129
TCGA-W9-A837	0.187897	0.0363126	52.7679	7.59778	0.0177054	21.463	7.13983	4.25338	36.7825	67.1621	19.1936	1.38263	160.105	82.5293	5.49517	0.0916464	105.256	15.0385	61.2707	5.55731	141.285	123.524	69.7151	19.4318	7.09471	18.7059	19.0861	51.0329	0.183881	6.84965	0.807348	4.13343	4.14736	276.042	18.7896	0.158052	31.7085	0.115026	12.9042	0.859423	18.849	45.9382	18.7185	58.2366	18.3223	49.8359	85.5753	9.05118	66.9682
TCGA-HT-7472	0.124875	0.0188777	66.8834	9.38438	0.0135323	33.7639	28.8895	8.51173	63.7854	58.4117	22.8405	2.65213	161.647	70.7603	6.83601	0.0480913	96.0156	14.2048	67.7532	9.87797	262.132	208.979	58.7026	12.9905	7.56622	18.7769	17.7859	41.5999	0.169921	3.52911	0.812229	2.63212	3.80154	228.275	12.7205	0.0533032	41.187	0.103462	24.5504	0.732757	22.198	60.2471	7.54594	80.5848	15.1842	59.2804	117.226	14.3267	68.1265
TCGA-HT-A74J	0.132367	0.0189513	12.6032	2.82906	0.00690228	8.98306	0.411386	1.19169	15.1069	82.2444	16.9935	0.475099	200.734	95.8755	4.4355	0.0770866	49.2558	16.5276	82.4707	3.78279	22.285	64.7616	22.8649	15.8919	27.6682	22.1175	19.1771	36.2251	0.269981	6.34837	0.902009	1.57803	5.71928	211.764	3.99914	0.0454817	14.4969	0.118704	5.11118	2.34682	29.1167	80.8783	7.09173	38.1087	25.164	32.2319	78.8196	10.8029	87.3958
TCGA-DB-5277	0.0748342	0.0225368	48.2632	2.76759	0.00688255	43.3952	20.9629	4.09316	28.1265	39.7891	21.4849	0.893469	238.216	105.554	3.49246	0.0329563	107.428	16.2592	122.289	3.94191	749.929	127.979	50.1869	20.8723	0.375258	20.8509	14.9014	28.5301	0.218646	2.59748	0.828337	1.97871	1.57787	87.751	3.24366	0.0493014	28.9673	0.0975291	14.0402	0.345868	6.25157	28.7361	5.40933	67.8786	10.357	61.529	64.3855	13.7553	71.0312
TCGA-FG-A60L	0.00753874	0.00831177	65.0375	4.79438	0.00630478	259.101	15123.8	448.357	135.495	52.2482	27.7816	2.88451	299.562	91.3194	9.49687	0.00490811	183.86	15.8585	336.518	58.6026	2301.26	40.9631	480.497	38.0304	0.00137652	26.1227	7.91469	4.94543	0.0191297	0.177501	0.660801	0.348618	0.549436	1.54328	1.89953	0.0111702	29.9309	0.025113	86.7254	1.6037	0.381743	2.83482	4.96957	113.941	24.1736	36.5608	129.121	70.3755	16.4911
TCGA-HT-A4DV	0.127503	0.0932302	109.949	14.8228	0.0220643	48.0926	8.22078	5.93769	53.4743	98.4563	27.1135	1.74137	232.558	95.8233	8.47646	0.104584	104.053	16.2711	113.755	13.8508	315.948	83.8271	105.468	28.7307	2.99212	22.6878	16.7707	34.1542	0.176153	3.72599	0.776034	1.18089	3.65619	52.2281	26.2914	0.216523	28.9965	0.139279	18.9371	2.51591	7.83223	44.9282	16.2438	118.784	27.4711	37.9757	59.2874	17.1998	79.3625
TCGA-S9-A6TS	0.106147	0.0188523	16.0344	5.37378	0.0114863	21.8488	22.8957	4.79163	33.406	68.884	26.7898	0.926508	222.828	94.951	5.59885	0.0355038	84.5646	16.381	102.987	11.4826	163.352	127.288	69.1032	28.4762	6.98322	24.6376	23.0342	28.2848	0.105087	4.0232	0.838242	1.09737	3.90499	77.1729	3.50045	0.047694	25.8198	0.067806	16.2752	1.58222	21.4018	25.946	9.42765	71.2821	26.32	52.2702	100.901	11.5576	68.4838
TCGA-FG-A70Y	0.192668	0.043126	55.0406	13.3895	0.0202704	37.0583	13.8072	5.6315	37.8056	103.507	30.9448	1.43461	215.855	87.3636	7.904	0.0553048	86.5514	16.2664	98.4022	16.1423	293.976	136.141	70.5126	31.0718	13.6233	24.5887	22.588	55.9638	0.216659	5.35154	0.888913	1.44465	5.26528	202.562	5.44061	0.123823	35.8053	0.14926	19.4494	2.36772	25.0817	72.8776	10.9792	83.5735	39.362	50.1394	117.379	15.129	88.1081
TCGA-DH-A66B	0.0273454	0.0164557	86.7902	7.70014	0.0122607	104.859	615.77	39.5947	133.115	37.1572	36.0735	1.10304	251.257	89.8622	5.52404	0.00854252	310.672	15.3842	131.4	9.79569	1147.56	144.068	94.662	23.1073	0.54205	26.5071	17.8333	23.3475	0.0869647	1.28969	0.839177	1.1068	1.81063	8.85638	9.8554	0.026501	35.0628	0.0998117	59.5179	1.49374	3.13577	15.1503	3.80068	126.953	27.281	83.7046	127.358	25.4188	36.6895
TCGA-DU-7019	0.306414	0.0781663	63.6664	28.4348	0.0323813	33.9831	30.3269	14.1947	63.2784	116.976	33.6707	3.86003	175.976	75.9783	11.5121	0.100762	141.71	15.1426	79.1531	24.7026	401.627	323.458	86.5105	64.3459	19.4346	23.0337	50.8059	92.0867	0.27763	12.7008	0.902492	2.47036	6.1365	340.444	20.447	0.202414	55.1236	0.140365	27.6804	2.12671	59.4309	73.1795	17.7611	125.043	43.2479	85.2878	195.142	14.4588	110.315
TCGA-FG-A4MY	0.351831	0.0350059	25.9872	2.71074	0.00598852	12.3522	0.353627	0.666269	12.6297	215.207	25.9135	0.458295	201.307	100.395	4.76165	0.0683034	87.3052	16.9895	100.831	6.14976	45.7451	114.75	29.6504	22.7789	42.8451	23.3817	14.8839	47.6807	0.600473	4.71016	0.975941	0.709142	11.9855	400.598	0.709825	0.0926735	12.0003	0.406614	11.2785	1.41615	99.4124	128.861	4.31071	73.4912	24.7806	52.4145	61.3386	14.0154	215.731
TCGA-HT-7477	0.035928	0.0355242	62.7533	2.78161	0.0216416	141.791	114.689	30.7613	16.1245	17.3342	36.9112	1.15195	465.741	116.996	6.75457	0.0197053	160.359	16.817	142.681	6.35681	691.122	103.569	96.5559	15.1464	0.331995	28.6342	12.5692	17.2499	0.0614759	1.18221	1.036	1.6325	1.48588	3.16719	6.26229	0.0264052	24.1776	0.0386181	19.3839	0.620343	3.34472	16.166	13.422	29.2636	13.1623	83.3438	62.7877	43.528	20.5897
TCGA-S9-A7R4	0.286524	0.00698838	3.75442	0.293694	0.00234092	1.56849	0.0454637	0.298629	1.69623	78.6821	16.1317	0.103958	124.777	69.1828	2.28245	0.0327134	17.4934	15.3244	55.6999	1.38314	0.408972	87.6187	6.91329	13.1584	82.5665	18.9814	21.194	53.9657	0.735041	18.1811	0.855368	0.765444	9.33914	774.429	0.0791448	0.0224163	7.5547	0.302775	2.33432	0.75481	118.881	67.3941	4.71475	19.9994	18.2798	49.3909	86.3387	4.05377	148.851
TCGA-WY-A85E	0.0737757	0.0135118	26.2553	1.03536	0.00393088	21.0458	2.74751	1.84401	21.6459	56.3661	16.7112	0.416895	187.885	102.208	5.54219	0.0326323	95.7169	16.1848	94.2789	3.00775	90.1241	73.8987	63.167	21.0779	3.42617	20.1434	16.3369	49.9136	0.227264	3.50125	0.828423	1.76202	3.49455	218.852	4.17264	0.0247107	20.0878	0.161545	8.9356	0.524659	10.4104	35.4713	9.92342	51.6801	12.0287	55.134	71.4547	13.0317	76.7142
TCGA-DU-7011	1.08896	0.0100869	1.78404	0.515571	0.00263276	0.456839	0.00736537	0.196388	1.86036	163.427	14.2549	0.0954515	111.37	58.4998	2.31304	0.0613707	15.1647	15.1549	46.0799	1.59329	0.0592259	134.16	5.02502	11.2885	496.294	18.1203	27.3216	87.4254	2.19736	37.1378	0.785591	1.46873	19.7206	3541.3	0.012917	0.0456129	10.8258	0.602903	2.26691	1.24908	607.333	209	4.44933	25.3208	19.6915	39.6368	212.933	2.40969	279.337
TCGA-DU-A7TC	0.0955727	0.0651275	57.5193	11.0128	0.0127441	42.5273	10.2772	5.7867	34.3292	70.42	28.3188	0.741496	259.367	92.198	8.2449	0.0488072	119.81	16.4633	104.329	5.8093	274.519	86.0494	107.31	43.3332	3.39273	22.5784	30.1792	57.6568	0.226051	7.18186	0.82041	2.21521	4.00824	106.699	13.0044	0.115035	39.7191	0.1959	11.8624	1.55473	7.31047	30.6445	19.5717	78.408	29.5982	45.992	80.402	12.6643	89.8312
TCGA-S9-A7IZ	0.463767	0.0262978	16.6527	8.06436	0.0101034	8.0965	0.733887	1.24657	18.388	141.541	18.1007	0.66145	175.725	72.338	5.5336	0.0773779	67.0176	15.6118	72.919	9.29256	37.0316	149.303	38.6461	15.7622	66.4954	19.4003	21.9733	75.1493	0.505591	12.2721	0.852389	1.3966	9.75391	1193.18	3.1523	0.203655	21.8744	0.237143	10.8101	1.72131	167.746	115.849	7.88125	47.2169	20.8097	37.4619	130.359	8.66845	161.329
TCGA-S9-A6WE	0.0322285	0.00739072	11.5576	2.13469	0.0060411	24.7702	64.6677	6.82574	67.705	30.0316	18.0406	1.61308	169.677	92.0721	4.51699	0.0401591	65.9823	14.9587	78.4996	5.54403	99.8485	98.1169	82.891	17.6753	1.82191	21.1235	18.2581	14.9583	0.0614308	2.76511	0.685882	1.8042	1.9133	47.4257	15.4025	0.0175828	25.4319	0.0455868	17.3505	0.629503	4.3473	13.4788	11.4986	60.9281	13.7765	52.3811	115.424	11.021	25.4149
TCGA-P5-A733	2.5603	0.0169713	4.17095	0.776876	0.00350722	0.791549	0.00718481	0.206928	1.92321	192.545	18.1746	0.125888	136.31	74.0154	3.42527	0.124221	16.7031	16.3729	58.4027	2.03659	0.391492	129.483	8.16839	16.4664	556.187	20.2384	39.1083	110.478	2.85524	64.1087	0.919412	1.60188	27.3605	8286.79	0.109066	0.116119	11.8771	0.637215	2.22281	1.16224	915.103	251.77	6.82416	23.8828	29.0052	45.0835	128.711	2.93091	363.017
TCGA-QH-A6CU	0.926982	0.0638046	7.15046	9.29847	0.0122287	6.56281	0.165698	0.60814	19.7689	376.586	23.5573	0.636762	176.779	89.4925	6.46454	0.215523	68.6207	16.868	86.7508	9.8153	21.8645	144.033	24.4959	29.4578	193.349	24.249	29.1919	60.0869	1.15984	19.1521	0.813303	2.75847	17.1691	1461.63	2.79591	0.20821	13.9994	0.282268	7.68643	3.59035	158.517	275.365	9.14192	67.8241	43.9261	39.061	165.572	6.64937	252.866
TCGA-HT-8013	0.0307877	0.00333991	3.88716	0.3544	0.00206063	8.88984	0.911689	1.25904	6.42624	35.9122	19.8528	0.145717	151.965	78.6522	2.78087	0.0108911	30.5495	15.7938	97.5209	2.03987	14.1261	55.044	14.5623	14.0247	3.24389	22.5327	6.77035	14.2162	0.0861128	1.10026	0.780077	0.485256	3.04089	22.7045	0.247372	0.0056474	7.03709	0.115327	4.13882	1.84593	6.58503	13.3266	1.92192	35.4966	18.5499	36.3981	56.8194	9.02816	50.7067
TCGA-DH-A669	0.00333904	0.00776121	25.8671	11.01	0.00378202	180.51	21919.8	940.684	202.938	32.1179	14.318	2.41084	371.851	95.5486	5.14268	0.00853949	236.884	15.6621	299.739	14.0147	1507.99	53.1597	618.943	29.9426	0.0009711	23.3153	14.4435	2.98231	0.00657882	0.23567	0.502273	0.422516	0.868732	0.184156	14.1201	0.00409634	40.6549	0.00415872	69.2673	0.991705	0.111835	0.765231	10.4507	184.222	11.5845	25.7484	135.849	50.2175	11.3635
TCGA-TM-A84S	0.247931	0.0288794	53.7382	15.2703	0.0162791	20.7678	13.9022	4.07336	63.8788	96.9531	19.2237	2.05096	168.259	91.7406	6.38688	0.122032	116.481	15.7492	85.2876	13.8206	113.669	106.188	68.5645	22.8719	15.0138	22.073	23.421	39.7851	0.18816	4.07399	0.751755	5.48092	5.83615	350.774	11.6858	0.111292	35.5613	0.0793008	15.2669	1.2548	28.9039	107.798	9.15615	85.3927	23.0071	42.0797	123.404	11.2863	81.3985
TCGA-VM-A8C9	0.0594802	1.45107	79.4475	118.952	0.253957	381.589	2036.75	1783.54	276.528	339.005	103.018	11.4754	331.761	89.1541	34.2317	0.0216277	350.643	16.5846	428.883	30893.7	1003.03	406.995	442.165	83.61	0.863418	33.2123	13.2571	26.9379	0.0945971	0.590302	0.681384	0.919338	3.36056	10.7569	1.71108	0.504291	121.699	0.246197	137.568	10.3713	3.37005	79.6945	6.85355	2005.63	114.394	34.6478	531.8	101.751	151.391
TCGA-DU-5871	0.0949683	0.0370573	42.0387	11.3138	0.0115361	37.0185	19.9391	5.65421	42.1085	59.363	34.5687	1.73075	209.295	91.0086	8.39321	0.0392204	108.667	15.7041	108.278	12.0059	301.93	120.495	73.5311	32.8744	5.83555	23.9663	23.8935	49.933	0.154412	3.06051	0.943185	2.18158	3.68867	206.739	9.15072	0.0603252	27.9272	0.133691	16.2633	1.12304	20.0645	39.677	5.1803	83.4252	32.6012	83.833	139.868	15.8105	97.3991
TCGA-HT-7476	1.27619	0.0397605	19.7027	2.82868	0.006881	5.77056	0.0295403	0.405298	4.7577	185.613	23.2487	0.141952	159.543	79.9784	4.51921	0.078587	50.4581	16.1633	65.392	2.44456	5.34128	97.8313	19.3771	29.8807	125.818	20.2839	29.3305	129.959	2.33165	27.362	0.880434	1.85701	14.4299	2027.69	0.379616	0.209779	19.2988	0.756533	3.85662	1.46549	253.105	210.002	9.53624	48.6467	31.1001	51.0306	84.3685	6.23379	295.185
TCGA-DU-7018	0.0234749	0.00344386	5.49505	0.554978	0.0015459	13.3714	37.6799	1.88788	22.7012	37.9777	8.37845	1.6068	151.215	77.5931	2.32274	0.0198154	43.0569	14.5385	93.9017	2.84669	9.99395	69.0494	61.8318	19.5596	0.938379	16.2033	15.3933	9.90253	0.0732191	2.03704	0.681896	1.46548	2.43166	133.262	2.63114	0.00443708	20.8157	0.0915588	9.50881	0.186147	4.97702	5.08905	3.91824	31.4153	7.52036	54.8718	160.606	12.2897	35.78
TCGA-P5-A5EU	0.0297116	0.0195511	33.4593	5.62076	0.0112402	67.7236	49.5125	31.7304	79.1846	47.0567	17.3628	0.492068	248.697	70.3912	4.89531	0.010583	64.1334	14.3727	145.984	8.4985	418.521	283.919	67.1032	6.02046	5.48657	20.2206	20.9805	32.019	0.227989	2.70316	0.872137	1.81902	4.01189	7.08014	1.60644	0.0143247	31.7378	0.10252	45.2445	0.952537	5.17433	36.5025	7.25641	206.298	10.5358	51.8622	112.785	16.7761	44.9287
TCGA-CS-5393	0.249638	0.028012	39.247	1.55516	0.00699395	16.8591	0.556668	1.24362	16.5175	98.6779	28.012	0.351516	162.78	89.6047	3.95123	0.0447474	64.6315	16.0128	82.6168	3.31886	35.0988	94.5887	32.0567	24.7866	12.5041	20.9514	13.9528	54.7888	0.466863	4.39559	0.941413	0.976814	7.08272	470.481	0.97416	0.0681292	17.9038	0.350545	5.89971	1.2451	42.699	81.296	5.55557	86.9273	24.7721	57.9096	64.3098	9.61647	135.485
TCGA-DB-A4XG	0.0563761	0.00795666	29.186	1.36706	0.0045337	17.8856	10.4306	2.51481	32.4262	41.0965	18.2257	0.970137	170.955	99.4864	3.07442	0.0443516	78.5944	15.2133	64.9686	2.71513	41.1257	89.127	57.6727	22.2019	2.72859	19.4043	16.3872	20.1262	0.113522	3.45705	0.778658	2.34916	3.03908	114.697	7.95562	0.0218794	23.4631	0.0832523	8.77203	0.402115	9.42587	19.302	8.47432	43	14.1024	69.0076	58.7732	11.1281	41.8664
TCGA-E1-A7YH	0.0885764	0.0144009	14.5596	1.48158	0.00677289	17.2931	3.66507	1.47706	14.9779	72.6213	21.0861	0.73497	190.635	95.5188	4.85495	0.029213	55.5998	16.1976	102.357	4.4457	91.3396	69.2326	34.112	17.3273	7.24509	21.7164	14.8979	28.8419	0.148203	3.4855	0.876337	0.601528	3.91847	89.3886	1.41579	0.0380272	9.96878	0.126032	7.91144	1.25354	14.4243	32.019	6.59612	44.943	21.9558	44.7503	49.201	15.1178	71.1569
TCGA-HW-A5KL	1.90871	0.00218423	0.367889	0.0207924	0.000702722	0.00462944	1.62228e-05	0.0337895	0.0255156	176.565	10.2228	0.0147317	109.161	79.9562	0.975753	0.073919	3.0384	17.0214	43.6899	0.436579	0	63.934	0.255059	12.7013	2111.47	19.3619	16.5502	42.5964	4.92989	54.5808	0.807886	0.887039	47.8964	9806.14	0.000190541	0.0103648	1.85395	0.629691	0.257881	1.47245	2609.4	251.59	1.86671	7.85841	18.7936	33.2446	100.682	1.46778	357.273
TCGA-DB-A64W	0.0304582	0.00917013	49.5034	2.50867	0.00629273	54.9165	9.07699	7.48013	35.7662	27.1169	12.7252	1.01888	222.97	96.1122	4.92994	0.0424876	183.696	15.0255	84.648	2.90853	140.651	65.7077	98.8282	14.6673	0.416236	17.0402	16.367	35.6478	0.113596	3.06482	0.783049	2.77546	2.89844	33.2331	47.2382	0.0178311	40.4395	0.112641	14.9726	0.197289	1.99713	8.78096	15.6736	50.4348	6.51058	49.2612	50.6338	18.7294	22.2957
TCGA-P5-A5EZ	12.2391	0.0180236	5.82221	0.0954839	0.00120214	0.136384	3.1955e-07	0.0357492	0.024876	436.024	17.8798	0.0103119	117.402	93.7551	1.57898	0.161683	13.1755	17.7511	54.8107	0.415518	0.000357296	57.5997	1.21475	21.3388	1113.03	19.5549	14.204	127.082	35.9495	38.4312	0.935923	0.835378	75.9495	17898.8	0.00214301	0.070756	3.39301	1.76056	0.295939	1.49729	2791.43	633.103	2.40618	31.5141	26.6897	40.7646	24.6603	1.95713	920.769
TCGA-P5-A780	0.112237	0.01331	7.59063	1.37362	0.00467959	9.79257	1.36789	1.23915	11.3413	94.7296	20.0287	0.541355	168.928	78.8353	4.53349	0.0345722	34.4494	15.6134	78.8595	4.79751	15.0953	96.4686	27.0177	17.8435	17.0957	21.2381	25.4379	31.2464	0.491487	9.38079	0.969588	0.49828	4.34905	326.893	0.794118	0.0293152	16.623	0.255742	10.8024	0.702724	36.214	47.5854	5.21551	38.6205	19.464	69.709	93.8638	12.422	81.8572
TCGA-S9-A6U9	0.262982	0.0151839	2.11176	1.16522	0.00348734	2.13169	0.0148377	0.230286	3.35227	118.878	20.1744	0.151611	153.01	83.0343	3.24269	0.0557906	32.637	16.4171	65.5118	1.73863	1.0639	83.981	5.97746	15.6638	255.724	22.7868	28.6393	72.5316	0.95715	20.9246	0.842158	1.21155	10.6196	601.73	0.121068	0.041058	6.92047	0.333689	2.3433	2.89936	102.13	112.784	4.88849	30.0958	33.4051	46.5597	83.6681	4.9661	200.384
TCGA-E1-5305	0.187077	0.034182	80.4014	13.7378	0.0173231	63.6176	71.8263	14.2582	66.6742	76.355	34.8769	3.69484	209.705	81.0821	11.3715	0.092927	154.163	15.0611	86.5957	14.0581	493.175	171.254	74.6299	27.8136	7.16943	20.7575	28.8895	39.1612	0.195662	4.63015	0.940584	3.86099	4.01321	228.796	34.8561	0.0803504	60.495	0.179836	28.4221	1.13983	26.4336	84.2938	12.9402	104.499	26.0022	84.0263	153.534	16.1226	87.2994
TCGA-DU-A6S8	0.046865	0.00338733	5.45447	0.403814	0.00175042	7.63533	0.507525	0.740361	6.37973	49.5314	10.8778	0.400368	179.909	107.006	4.18977	0.0386835	39.6393	16.1528	87.9125	1.55427	4.19972	64.6855	39.1949	24.6837	8.88895	19.1666	20.935	15.8683	0.1746	5.9985	0.712541	1.33724	4.22212	140.739	3.75918	0.00672457	11.8192	0.102807	3.63574	0.561433	8.6981	17.9073	4.86199	32.8288	12.1583	44.1388	79.3873	12.7163	55.6342
TCGA-S9-A6WP	0.0623008	0.0118959	9.06329	1.3163	0.00433599	16.3598	2.44947	1.42703	16.7614	64.0585	18.8452	0.550356	177.272	93.7743	4.37686	0.0422496	56.1733	16.2882	90.236	3.79856	18.445	92.2373	45.3993	29.1294	7.16994	21.9305	15.6481	22.0002	0.189967	3.2401	0.799546	0.700742	5.46762	79.9555	3.05189	0.0280825	16.1671	0.157445	7.54128	1.25394	10.7666	22.5081	4.76467	58.417	19.5805	40.9931	71.5722	13.3481	66.8994
TCGA-R8-A6MO	0.0427483	0.016338	17.9608	2.11842	0.00736132	33.3364	25.9359	4.96218	43.751	48.166	23.1086	1.17053	191.801	103.633	5.88898	0.034997	80.5747	15.9589	97.6561	7.88859	124.767	93.2753	99.6194	21.5194	2.29973	23.5291	16.4734	16.2961	0.0988936	2.34009	0.756455	0.642498	2.27457	25.0636	5.25836	0.0339317	20.131	0.0905232	19.541	1.26396	4.78889	14.0437	10.3831	71.8531	20.5654	49.2533	58.6851	16.7291	34.7471
TCGA-DB-A64L	0.172146	0.00978451	7.09044	0.655628	0.00373391	5.12746	0.108611	0.733938	3.02177	109.401	18.1651	0.267085	160.423	91.1997	3.50796	0.1959	70.5808	15.6016	57.5442	2.00756	3.88522	130.887	12.7878	10.0971	52.1385	15.9184	19.7079	29.3609	0.456582	16.9856	0.931486	2.45085	7.79328	317.657	2.12829	0.0621605	14.6598	0.187775	2.15045	3.08859	49.7559	49.4599	7.18572	28.8799	13.2774	45.4333	76.4659	4.61729	132.51
TCGA-DU-7301	0.056856	0.0191953	12.7512	3.16548	0.00562377	34.7573	100.012	4.86008	63.8237	87.2573	18.5046	2.51403	175.344	70.2035	6.51052	0.0255864	88.1511	14.2876	86.6276	9.18239	241.967	153.431	66.2064	14.451	4.71974	18.4351	22.4018	59.5446	0.15912	3.34382	0.754873	2.01563	2.94412	469.616	1.26873	0.0254332	26.1178	0.175865	33.5162	0.491032	20.4183	39.6409	6.56601	53.5528	12.1079	81.6959	296.296	20.5581	88.8245
TCGA-RY-A845	0.0501287	0.0143985	28.3942	2.8578	0.00866353	26.5407	23.3967	5.26321	36.2088	42.896	16.5208	1.39239	189.117	87.9048	5.23334	0.0293187	62.1723	15.3733	87.6036	6.14346	247.695	87.1279	73.1793	14.2198	2.58221	19.7328	15.2327	39.296	0.108096	2.81109	0.767938	1.6365	3.11508	92.4748	8.16462	0.030825	20.5451	0.0581134	12.9608	0.839992	5.63105	23.9709	9.87938	45.7897	14.1873	40.8267	66.9732	12.1678	46.2792
TCGA-HT-8019	4.49059	0.299372	84.7242	13.0062	0.0174589	4.91781	0.000537876	0.331241	4.01567	305.239	16.3968	0.144092	164.693	74.2786	5.7285	0.430624	84.2936	16.1504	52.6703	1.77795	5.65203	83.0384	24.387	26.7748	135.446	16.4356	27.0571	289.344	7.25287	65.8393	0.838451	4.05492	31.7951	4142.65	6.35065	4.61296	31.1018	1.72573	2.27327	2.31122	315.048	461.662	19.3522	81.214	21.7683	28.6595	63.5878	4.77278	495.702
TCGA-QH-A6CY	0.761376	0.05065	48.7447	10.916	0.0138434	10.6981	0.29839	1.12841	20.883	127.95	16.4947	0.656148	154.458	79.5786	6.49587	0.204219	95.3595	15.4628	62.51	4.17306	41.2824	112.33	48.5124	25.1159	43.5679	17.8347	32.0106	96.2684	0.85831	24.6023	0.778814	3.61002	10.3337	1000.35	13.0438	0.369322	30.4983	0.315385	7.64395	1.35819	91.724	162.531	20.9001	69.5084	18.1626	40.9092	78.5052	6.92013	171.472
TCGA-S9-A7QX	0.0581143	0.0042009	4.12223	0.267966	0.00173889	5.54529	3.72352	0.868297	5.52172	52.5891	18.4883	0.205833	161.466	79.9387	2.50353	0.0177272	16.9477	15.8374	90.9754	1.88619	9.81842	59.5044	20.5446	21.8078	9.35684	21.105	12.0391	16.5522	0.125498	3.01937	0.778432	0.493226	3.85151	129.754	0.221845	0.00667887	11.0927	0.111383	4.51297	0.687778	20.2686	17.9095	3.16632	25.7804	19.0037	51.6061	89.553	7.903	77.4593
TCGA-S9-A6WD	0.0854825	0.0218478	17.254	1.46615	0.00484743	15.8662	7.78677	1.81467	24.4451	68.1291	20.8533	1.09961	157.496	90.4619	5.12497	0.0576464	68.0982	15.641	81.3399	4.56589	50.9302	124.071	73.8242	23.4384	8.39024	18.9484	23.0068	28.9292	0.119803	4.1058	0.747279	2.04237	4.56455	156.59	4.88018	0.0292665	22.4834	0.106546	8.22297	0.590899	12.0254	22.9808	7.94543	58.3349	21.5269	50.9058	137.683	9.36383	100.232
TCGA-P5-A72W	0.0853471	0.00544133	2.98113	0.850151	0.00168763	6.215	4.11861	0.735957	10.9112	53.0776	18.6856	0.248063	227.549	100.216	4.17395	0.0233949	29.9645	17.2148	132.08	3.66633	16.8543	61.443	25.6071	31.0696	24.1377	25.063	24.0831	14.3751	0.170582	4.51355	0.696693	1.40482	5.92144	190.139	0.123679	0.0110417	13.5894	0.116813	6.61564	1.21004	33.4383	39.2682	3.31387	28.3139	23.1405	46.1912	122.113	8.05607	119.896
TCGA-DH-A7UV	0.123751	0.00843417	9.37369	0.628293	0.00303295	6.95892	0.270126	0.581355	4.43437	81.9615	18.8466	0.223843	176.178	103.567	3.15217	0.0513847	35.1364	16.8307	78.215	2.14848	19.5166	64.9679	17.5723	21.558	16.6686	22.8398	11.2331	31.4412	0.209216	3.38007	0.894826	0.706564	6.67831	265.704	0.631747	0.0176702	7.93635	0.130067	3.4996	1.60764	29.5405	47.2636	4.07872	27.2823	26.2662	43.7627	45.5542	9.34099	91.8197
TCGA-FG-A6J1	0.00336534	0.00331351	51.7216	1.89008	0.00273185	145.767	24935.9	457.355	125.402	19.213	18.5973	1.60714	303.452	105.661	3.91805	0.00694337	113.616	15.6562	234.229	15.7032	982.003	25.0466	402.973	37.9998	0.000217655	24.4723	7.0697	1.4086	0.010786	0.168201	0.613365	0.494438	0.494261	0.770149	5.13944	0.00471609	29.0782	0.00679462	47.0827	2.07434	0.149077	0.925611	4.48608	73.5846	15.0558	33.0511	75.6505	37.9301	6.06176
TCGA-HT-7684	0.245598	0.0555074	1.91001	26.0552	0.0103651	15.085	1.7137	1.93034	34.7833	241.954	31.4154	2.28294	191.83	83.2674	12.5888	0.114891	76.2458	16.3849	118.62	31.7402	22.9576	296.072	40.0922	38.9235	119.761	24.1433	102.886	66.1472	0.9304	34.7177	0.698152	3.83554	8.61128	615.19	1.12033	0.138348	21.6029	0.173632	12.0695	3.44327	102.585	147.379	11.2717	94.2586	59.3031	43.3176	810.676	10.5202	219.419
TCGA-DB-A4XF	1.05182	0.0822618	35.5141	10.7823	0.0264298	11.6752	0.387212	1.32655	22.4507	174.152	24.8305	1.01141	183.649	80.1288	6.24583	0.129361	102.668	15.5171	65.8044	7.63866	46.9863	318.592	32.3581	16.3432	142.568	20.9915	47.8891	124.933	1.55263	31.5826	0.91595	3.5002	11.4175	3207.76	6.04614	0.369777	32.4475	0.435055	13.6744	1.21117	277.013	269.107	13.9488	63.4724	22.5751	66.3084	151.927	10.3462	213.677
TCGA-S9-A6WO	0.0414835	0.00667877	13.3412	1.03978	0.00385928	18.5209	7.34441	2.13493	15.2288	40.8974	22.185	0.569616	177.547	91.7019	4.71374	0.0278064	46.3347	15.6312	86.543	2.88772	60.0931	68.553	29.4577	19.6144	4.10042	21.6741	12.6264	23.1729	0.0840944	1.98683	0.871705	1.00973	3.33796	103.102	2.38101	0.0115708	14.1893	0.09713	7.6096	0.953131	8.32772	23.6271	4.26707	37.0635	19.5559	67.334	88.5613	12.173	48.6463
TCGA-FG-A60K	0.055	0.00604608	24.3265	1.92564	0.0068235	16.058	14.1115	3.98038	35.1793	32.9922	17.4865	1.3067	150.093	93.0513	3.31756	0.044026	68.2941	15.0981	68.3795	4.8754	46.7644	80.3405	40.5946	16.8713	2.40619	20.5306	11.4078	10.8123	0.0601941	1.78207	0.848341	1.61258	2.44222	50.5249	16.1412	0.0230937	16.2971	0.0291201	10.3007	0.795861	7.75985	17.4414	7.39234	44.6619	14.1645	61.1062	54.1762	8.26402	22.8249
TCGA-DU-7299	0.0655378	0.0189952	26.5224	7.29086	0.0133304	49.3718	21.557	6.25423	51.6802	36.8842	23.0606	1.86611	186.681	92.3745	8.46777	0.0431808	69.2522	15.3186	87.9128	5.93619	354.562	150.948	61.6822	29.8032	2.86154	19.9758	23.8946	38.1158	0.178341	4.93897	0.887175	1.80618	2.9769	91.4574	10.3667	0.0504274	36.0393	0.180783	16.0537	1.11636	7.89114	19.4465	9.62678	66.6884	18.202	70.5054	79.5823	19.36	61.0092
TCGA-DB-A4XA	0.244177	0.0118478	5.61654	1.29121	0.00326391	3.61885	0.171596	0.495585	7.79941	119.125	15.7074	0.273733	155.189	82.9713	3.23693	0.0682306	35.7922	16.149	75.0294	2.93708	1.91119	84.2375	17.7096	18.9761	55.2342	21.2563	13.5539	28.5601	0.347321	4.60748	0.7459	1.61614	11.2706	398.394	0.384853	0.0350188	11.8971	0.175643	3.99559	1.6409	66.755	62.0392	3.57147	40.2618	21.8737	35.178	107.959	6.44356	126.563
TCGA-TQ-A7RR	0.0501796	0.0270999	85.3445	6.56085	0.0129675	39.449	42.3774	9.42408	45.8768	44.6548	26.4208	1.26118	179.006	93.2705	5.84647	0.0237964	129.095	15.6396	109.917	8.29669	530.446	69.1693	89.4981	19.7927	0.478307	21.4378	12.0455	30.8871	0.0970253	1.34188	0.856279	0.800986	2.1948	31.4648	8.62631	0.0560794	21.5771	0.054608	17.4707	1.10338	4.23961	21.5709	7.54833	97.2487	21.292	43.8381	43.9012	17.9002	52.1985
TCGA-VM-A8CA	0.179207	0.0541739	11.9712	15.1746	0.0110253	15.122	0.37746	1.53639	30.8993	180.406	25.7716	0.643946	182.813	87.8924	6.87265	0.0993042	152.903	16.1475	117.967	9.46761	35.0725	126.383	58.468	45.8703	34.5593	21.4074	44.9821	70.6976	0.483819	12.2999	0.751641	3.78352	7.30605	408.19	4.73293	0.36703	27.3594	0.200057	7.96507	3.23393	24.4242	147.164	7.99018	141.047	43.548	35.463	159.252	8.32359	228.704
TCGA-P5-A77W	0.0634708	0.00362112	2.86436	0.0364332	0.000764621	1.37562	0.124059	0.225826	2.1342	65.5903	11.9021	0.0939497	109.923	88.7687	1.26346	0.0298776	19.8355	15.8275	85.2154	0.683513	0.0168606	37.7692	17.2416	29.0787	5.28698	17.0443	10.7506	13.2872	0.170141	3.06599	0.724966	0.50316	5.34405	398.085	0.119405	0.0051275	5.64554	0.141756	1.54012	0.268715	24.4445	11.8828	2.11751	24.1029	13.782	47.4909	58.338	5.39031	79.0739
TCGA-HT-8113	1.23545	0.184445	125.439	32.5465	0.0530412	17.4016	0.11788	2.22753	18.9099	165.202	15.008	0.740991	173.953	67.0825	9.65456	0.462956	167.83	14.7169	50.9033	4.07245	86.0954	170.282	51.1766	15.1775	39.3912	14.469	33.2846	190.442	1.44128	52.6084	0.811344	7.70773	11.7614	1223.88	48.7969	2.53943	65.3838	0.577385	7.1172	2.52922	113.969	240.15	31.8245	95.6227	13.0283	31.9923	112.091	7.74077	258.944
TCGA-HT-A74K	0.0283442	0.0310387	15.6843	6.98781	0.00562507	57.6342	127.427	13.7057	58.1048	103.039	28.0673	1.00241	301.637	98.4917	6.05772	0.0162876	111.309	16.031	217.351	16.3602	215.774	60.793	217.26	53.7254	0.373491	25.0067	17.0026	7.77654	0.0622495	0.841925	0.63783	0.912776	1.81419	9.28908	1.17785	0.0302524	31.2367	0.0789338	32.0938	2.33743	2.67417	10.8527	4.52	161.567	28.7229	37.8112	88.7943	20.1568	71.9734
TCGA-HW-8321	0.214521	0.0123624	21.7958	3.36092	0.00606617	17.193	2.45829	1.62795	13.2833	94.5381	18.8655	0.79251	169.396	80.3553	5.78084	0.0558661	51.6551	15.3509	72.8615	4.24581	61.7194	157.778	27.3176	17.5876	17.0524	20.1176	20.2899	48.3466	0.30456	7.33271	0.848134	1.63248	4.68921	427.877	2.8171	0.0287773	18.5193	0.160574	12.727	1.01096	67.7097	48.5885	7.79573	38.3708	17.7415	69.1748	119.919	14.7894	118.96
TCGA-QH-A65X	0.00562999	0.00746408	15.2208	1.1553	0.00236716	76.9866	1362.4	32.2408	76.3539	33.7352	21.1801	1.98686	332.253	108.133	4.31493	0.00809109	76.8679	16.5375	284.888	11.6384	209.554	36.7828	371.628	79.2507	0.0168584	26.2906	16.7751	2.3662	0.0236599	0.46646	0.549607	0.496784	0.801987	2.6824	1.81029	0.00715967	28.6918	0.0229389	33.3204	1.84924	0.425207	1.79299	4.05788	60.331	21.2827	40.3955	79.3124	32.1299	18.1428
TCGA-E1-A7YO	0.230313	0.024574	69.7107	1.85131	0.0076441	14.8153	0.657421	1.2169	17.03	87.9168	16.5829	0.728959	140.507	97.1198	4.35118	0.114603	125.18	15.7164	61.6518	3.17324	17.7283	83.3481	48.7222	20.4665	9.3423	19.2083	14.9525	46.3433	0.322623	4.58513	0.923077	2.16678	8.29566	496.737	4.67539	0.155835	18.1707	0.229161	6.53755	0.906605	32.2864	57.8884	6.83414	64.5277	18.9589	51.5821	48.8253	12.5812	102.045
TCGA-HW-A5KJ	0.93383	0.00309354	0.357887	0.0157511	0.000567293	0.0211708	5.49654e-05	0.0399875	0.0532495	222.424	9.60425	0.00954298	114.712	77.491	0.937209	0.0573976	6.25637	16.751	49.4009	0.443368	0	50.17	1.53682	16.5453	831.655	18.9525	19.2803	43.8993	3.21451	45.3901	0.725748	0.754228	29.3264	6427.8	0.000126805	0.0132435	1.99642	0.657815	0.396447	1.11616	1205.87	161.066	2.30009	10.6679	18.116	32.1116	81.9391	1.48571	373.697
TCGA-FG-A710	0.0344866	0.0113773	14.4501	2.58945	0.00584299	25.6084	10.2409	5.17581	40.1088	43.2557	20.3788	0.565097	178.313	84.9486	5.22436	0.025097	68.2262	15.828	103.452	5.71294	43.8371	69.8947	64.7498	26.7265	1.69713	23.7577	11.699	11.5778	0.0877305	1.67404	0.711968	1.15737	2.50192	27.7669	3.89569	0.0332063	21.307	0.0657868	12.6839	2.08561	4.24038	14.5632	5.2706	84.6097	20.4303	40.3071	65.9776	11.8917	34.5845
TCGA-S9-A7IS	0.00359633	0.0046454	4.33804	0.448988	0.00548307	98.8304	457.226	21.4629	76.8833	13.5554	19.4954	0.859669	418.874	100.284	5.19124	0.00447011	60.8384	15.3916	194.126	2.67431	323.535	58.8338	102.045	11.0908	0.135696	21.5883	19.5037	6.62479	0.0309415	1.08556	0.919778	0.192348	1.08163	1.4843	7.21059	0.00553832	30.0203	0.0261658	24.2341	0.27257	0.283872	1.98517	8.27535	54.3416	5.16965	90.1866	43.714	31.1133	10.3722
[truncated: 117 more rows]
[truncated: 149 more columns]

## Sheet: LIHC
Sensitivity of various tumors to 198 drugs in the TCGA database
[truncated: 371 more rows]
[truncated: 149 more columns]
