# Supplementary material for: ANGPT1 as a Key Regulator in Tumor Microenvironment and Immunotherapy Response Across Multiple Cancers: A Pan-cancer Analysis
Source: Research Square preprint supplement (doi:10.21203/rs.3.rs-8265672/v1), 2025-12-25
Supplement: Supplementary file 3 [file c306f82ee74aa04af8771103.docx]

| **ID sample** | **Gender** | **Age** | **Source** | **Diagnosis** | **Prognosis** | **ANGPT1 expression(FPKM)** |
| --- | --- | --- | --- | --- | --- | --- |
| S25 | F | 25 | BM | AML | NR | 14.79229 |
| S14 | M | 36 | BM | AML | NR | 6.026754 |
| S13 | M | 41 | BM | AML | NR | 3.474575 |
| S20 | F | 28 | BM | AML | NR | 2.134299 |
| S33 | M | 26 | BM | AML | NR | 0.960369 |
| S22 | M | 46 | BM | AML | NR | 0.923401 |
| S26 | F | 31 | BM | AML | NR | 0.738251 |
| S37 | M | 29 | BM | AML | CR | 0.625035 |
| S36 | F | 34 | BM | AML | CR | 0.54012 |
| S38 | M | 33 | BM | AML | NR | 0.409892 |
| S21 | M | 35 | BM | AML | NR | 0.344641 |
| S31 | M | 39 | BM | AML | CR | 0.198964 |
| S3 | M | 28 | BM | AML | CR | 0.019552 |

**Supplementary Table 4**

Specific characteristics of AML patients
