# Supplementary material for: ANGPT1 as a Key Regulator in Tumor Microenvironment and Immunotherapy Response Across Multiple Cancers: A Pan-cancer Analysis
Source: Research Square preprint supplement (doi:10.21203/rs.3.rs-8265672/v1), 2025-12-25
Supplement: Supplementary file 4 [file ec3341d8e8e741754b012b61.docx]

**Supplementary Table 3**

| **ID sample** | **Gender** | **Age** | **Source** | **FAB subtype** | **Cell count(×10^9/L)** | | | **BM Blast(%)** | **Mutant** | **Karyotype** | **Fusion Gene** |
| --- | --- | --- | --- | --- | --- | --- | --- | --- | --- | --- | --- |
| **WBC** | **HB** | **PLT** |
| AML 01 | F | 22 | BM | M2 | 25.45 | 106 | 66 | 41.05 | IDH2-4exon | 46,XX,t(8；21）（q22，q22）/46,XY/46,XX | WT1,AML1-ETO |
| AML 02 | M | 43 | BM | M4 | 55.11 | 68 | 89 | 22.47 | FLT3-D835 | 46,XY | WT1 |
| AML 03 | M | 47 | BM | M2 | 3.6 | 61 | 49 | 54.92 | c-kit-17exon | 46,XY,t(8；21）（q22，q22）/46,XY | AML1-ETO |
| AML 04 | M | 44 | BM | M4/M5 | 45.1 | 70 | 67 | 48.83 | c-kit-18exon | 46,XY | WT1 |
| AML 05 | M | 26 | BM | M2 | 0.57 | 61 | 28 | 56.98 | FLT3-ITD | 46,XY | WT1 |
| AML 06 | M | 59 | BM | M2 | 1.25 | 65 | 17 | 31.59 | IDH2-4exon | 46,XY | WT1 |
| AML 07 | M | 31 | BM | M5 | 77.79 | 61 | 27 | 48.62 |  | 46,XY | WT1 |
| AML 08 | M | 43 | BM | M2 | 24.19 | 49 | 2 | 35.06 | FLT3-D835,ASXL1-13exonA | 46,XY,t(8；21）（q22，q22）/46,XY | WT1,AML1-ETO |
| AML 09 | F | 42 | BM | M4 | 47.41 | 66 | 46 | 81.55 | FLT3-D835,CEBPA-11exonA，CEBPA-11exonB | 46,XX,(-17,-22) | WT1 |
| AML 10 | M | 25 | BM | M5 | 25.52 | 74 | 35 | 21.31 | FLT3-ITD | 46,XY | WT1 |

Specific characteristics of AML patients with disease and healthy individuals.

**AML patients:**

**Healthy Individuals**:

| **ID sample** | **Gender** | **Age** | **Hematological index** | | |
| --- | --- | --- | --- | --- | --- |
| **WBC(G/L)** | **HGB(G/L)** | **PLT(G/L)** |
| HD01 | M | 31 | 8.75 | 157 | 216 |
| HD02 | F | 26 | 6.48 | 120 | 269 |
| HD03 | F | 26 | 4.87 | 124 | 220 |
| HD04 | M | 28 | 4.84 | 125 | 236 |
| HD05 | M | 42 | 7.37 | 137 | 250 |
| HD06 | F | 23 | 7.19 | 123 | 122 |
| HD07 | F | 22 | 6.4 | 121 | 202 |
| HD08 | M | 47 | 5.02 | 139 | 242 |
| HD09 | F | 35 | 6.75 | 125 | 139 |
| HD10 | M | 23 | 5.42 | 142 | 149 |
